# Supplementary material for: SF3B1-mutated chronic lymphocytic leukemia shows evidence of NOTCH1 pathway activation including CD20 downregulation
Source: PubMed Central journal article supplement — Haematologica. 2020 Oct 29;106(12):3125–35. doi: 10.3324/haematol.2020.261891 (PMC8634191; doi:10.3324/haematol.2020.261891), 2020-10-29
Supplement: 2020_261891_POZZO_SUPPL.pdf [file 2020_261891_POZZO_SUPPL.pdf]

## **SF3B1-mutated chronic lymphocytic leukemia shows evidence of NOTCH1 pathway activation including CD20 downregulation**

**Federico Pozzo,<sup>1</sup> Tamara Bittolo,<sup>1</sup> Erika Tissino,<sup>1</sup> Filippo Vit,<sup>1,2</sup> Elena Vendramini,<sup>1</sup> Luca Laurenti,<sup>3</sup> Giovanni D'Arena,<sup>4</sup> Jacopo Olivieri,<sup>5</sup> Gabriele Pozzato,<sup>6</sup> Francesco Zaja,<sup>6</sup> Annalisa Chiarenza,<sup>7</sup> Francesco Di Raimondo,<sup>7</sup> Antonella Zucchetto,<sup>1</sup> Riccardo Bomben,<sup>1</sup> Francesca Maria Rossi,<sup>1</sup> Giovanni Del Poeta,<sup>8</sup> Michele Dal Bo<sup>1</sup> and Valter Gattei<sup>1</sup>**

<sup>1</sup>Clinical and Experimental Onco-Hematology Unit, Centro di Riferimento Oncologico di Aviano (CRO) IRCCS, Aviano; <sup>2</sup>Department of Life Science, University of Trieste, Trieste; <sup>3</sup>Hematology Institute, Catholic University of the Sacred Heart, Fondazione Policlinico A. Gemelli, Rome; <sup>4</sup>Hematology Service, S. Luca Hospital, Vallo Della Lucania; <sup>5</sup>Clinica Ematologica, Centro Trapianti e Terapie Cellulari "Carlo Melzi", Azienda Sanitaria Universitaria Integrata di Udine, Udine; <sup>6</sup>Department of Internal Medicine and Hematology, Maggiore General Hospital, University of Trieste, Trieste; <sup>7</sup>Division of Hematology, Ferrarotto Hospital, Catania and <sup>8</sup>Division of Hematology, S. Eugenio Hospital and University of Tor Vergata, Rome, Italy

©2021 Ferrata Storti Foundation. This is an open-access paper. doi:10.3324/haematol.2020.261891

Received: June 11, 2020.

Accepted: October 6, 2020.

Pre-published: October 29, 2020.

Correspondence: *FEDERICO POZZO* - federico.pozzo@cro.it

*VALTER GATTEI* - vgatei@cro.it

---

## Supplementary Information for

### ***SF3B1*-mutated chronic lymphocytic leukemia shows evidence of NOTCH1 pathway activation including CD20 downregulation**

Federico Pozzo<sup>1</sup>, Tamara Bittolo<sup>1</sup>, Erika Tissino<sup>1</sup>, Filippo Vit<sup>1,2</sup>, Elena Vendramini<sup>1</sup>, Luca Laurenti<sup>3</sup>, Giovanni D'Arena<sup>4</sup>, Jacopo Olivieri<sup>5</sup>, Gabriele Pozzato<sup>6</sup>, Francesco Zaja<sup>6</sup>, Annalisa Chiarenza<sup>7</sup>, Francesco Di Raimondo<sup>7</sup>, Antonella Zucchetto<sup>1</sup>, Riccardo Bomben<sup>1</sup>, Francesca Maria Rossi<sup>1</sup>, Giovanni Del Poeta<sup>8</sup>, Michele Dal Bo<sup>1</sup> and Valter Gattei<sup>1</sup>.

<sup>1</sup> Clinical and Experimental Onco-Hematology Unit, Centro di Riferimento Oncologico di Aviano (CRO) IRCCS, Aviano (PN), Italy; <sup>2</sup> University of Trieste, Trieste, Italy; <sup>3</sup> Hematology Institute, Catholic University of the Sacred Heart, Fondazione Policlinico A. Gemelli, Rome, Italy; <sup>4</sup> Hematology Service, S. Luca Hospital, Vallo Della Lucania (SA), Italy; <sup>5</sup> Clinica Ematologica, Centro Trapianti e Terapie Cellulari "Carlo Melzi", Azienda Sanitaria Universitaria Integrata di Udine, Italy; <sup>6</sup> Department of Internal Medicine and Hematology, Maggiore General Hospital, University of Trieste, Trieste, Italy; <sup>7</sup> Division of Hematology, Ferrarotto Hospital, Catania, Italy; <sup>8</sup> Division of Hematology, S. Eugenio Hospital and University of Tor Vergata, Rome, Italy.

#### Supplementary Information:

- **Supplemental Materials and Methods**
- **Supplemental Figure Legends**
- **Supplemental Figures**
  - Supplemental Figure 1. Distributions of recurrent mutations in the *NOTCH1* gene and analysis of Time-to-First-treatment.
  - Supplemental Figure 2. *SF3B1* mutations induce alternative splicing.
  - Supplemental Figure 3. Gene expression profile.
  - Supplemental Figure 4. GSEA analysis of *NOTCH1*-related datasets.
  - Supplemental Figure 5. Analysis of CD20 expression.
- **Supplemental Tables**
  - Supplemental Table 1. Characteristics of the study cohort.
  - Supplemental Table 2. Association between *SF3B1* mutations and other prognosticators.
  - Supplemental Table 3. Differentially expressed probes between *SF3B1*-mut and WT CLL cases.
  - Supplemental Table 4. Differentially expressed probes between *NOTCH1*-mut and WT CLL cases.
  - Supplemental Table 5. Gene Set Enrichment Analysis of *NOTCH1*-related datasets.

## Supplementary Methods

### Next Generation Sequencing

For targeted sequencing, specific PCR primers were designed and modified according to Illumina (San Diego, CA). Multiplex PCR products were a high fidelity Taq polymerase (Phusion High-Fidelity DNA Polymerase, ThermoFisher Scientific, Waltham, MA) and subsequently tagged with specific index according to modified procedures for NexteraXT (Illumina). Purified libraries were pooled, and paired-end sequenced in a MiSeq instrument (Illumina). For NexteraXT-based sequencing, PCR amplicons were generated using a high fidelity Taq polymerase (Phusion High-Fidelity DNA Polymerase, ThermoFisher Scientific), fragmented and subjected to NGS on a MiSeq sequencer (Illumina). Data were analyzed with MiSeq Reporter (Illumina) or aligned using HISAT2<sup>1</sup> against human genome assembly hg19, analyzed with custom pipelines and visualized with IGV software<sup>2</sup>. Results were expressed as Variant Allele Frequency (VAF). Variants with a “Strand Bias” or “LowGQ” flag were discarded.

### Targeted splicing variant analysis

Target genes *DVL2*, *GCC2* and *MAP3K7* were selected among the highest-scoring alternatively-spliced transcripts identified by Wang et al.<sup>3</sup>. For determination of alternative splicing variant abundance by NGS, single amplicons spanning the alternative splice site were sequenced by ultradeep NGS and the coverage across the spliced and not spliced regions was computed using the SAMtools *depth* command. A “percent spliced-in” (PSI) metric was defined as the ratio between the abundance of the alternative spliced isoform and the abundance of the total transcript. Alternative splicing of *DVL2* (*altDVL2*) by RT-qPCR was evaluated using the reported<sup>3</sup> hydrolysis assay and normalized against total *DVL2*.

### Quantitative Real-Time PCR

RNA for Quantitative Real-Time PCR (RT-qPCR) was extracted with TRIZOL Reagent (ThermoFisher Scientific) or the RNeasy MicroKit (Qiagen, Hilden, Germany) with DNaseI digestion; reverse transcription was carried out using oligodT primers and ImpromII reverse transcriptase with RNaseIn RNase inhibitors (all from Promega, Madison, WI). Transcript expression of genes of interest was assessed on a CFX96 Real-Time PCR system (Bio-Rad, Hercules, CA) using FastStart Universal PCR Master Mix (Roche, Basel, Switzerland) using hydrolysis probe-based assays (total *DVL2* Hs.PT.58.40551087, *DTX1* Hs.PT.58.26105230, *HES1* Hs.PT.58.4181121, *HEY1* Hs.PT.58.4299267, *MS4A1* Hs.PT.56a.24784282 IDT Integrated DNA Technologies, Leuven, Belgium; *CD300A* Hs00381974\_m1, *IL1R2* Hs00174759\_m1, *HES4* Hs00368353\_g1 ThermoFisher Scientific) and normalized against total beta-2-microglobulin (forward primer, CCTGAATCTTTGGAGTACGCT; reverse primer, GGCATTCCTGAAGCTGACA; probe, CTAAGGCCACGGAGCGAGACATC, IDT). Abundance of the alternatively spliced *DVL2* was evaluated using the reported assay<sup>3</sup> and normalized against total *DVL2*.

### Gene expression profiling (GEP) and data mining tools

CLL cases for GEP experiments were selected among those with a CD5+ purity >90%, unmutated IGHV status and absence of trisomy 12. Total RNA for GEP was extracted using the TRIZOL Reagent (Thermo Fisher Scientific) and validated for integrity using the 2200 TapeStation system (Agilent Technologies, Santa Clara, CA). RNA samples were labeled with the Low Input Quick Amp Gene Expression Labeling Kits, hybridized on oligonucleotide microarray slides (SurePrint G3 Human GE v2 8x60K Microarray 8x60K, Agilent design ID 039494, <https://earray.chem.agilent.com/earray/>) and acquired with a microarray scanner (all reagents and instruments from Agilent Technologies) as previously described<sup>4</sup>. The hybridization signal values for the multiple probes were generated with the use of Agilent Feature Extraction Software 10.7.3 (Agilent Technologies, Santa Clara, CA). Microarray data are available at GEO (<http://www.ncbi.nlm.nih.gov/geo/>) under accession number GSE137024.

Bioinformatic analyses were performed using GeneSpringGX 11.5 software (Agilent Technologies). Differentially expressed genes were selected by moderated t-test with Bonferroni-Holm correction for multiple testing for a p value <0.05 and a fold change >1.5. For clustering purposes, only known genes were employed, excluding unannotated probes, generic ORFs, antisense RNAs, long intergenic RNAs and uncharacterized loci. Unsupervised hierarchical clustering was performed using Cluster3 (<http://bonsai.hgc.jp/~mdehoon/software/cluster/>),<sup>5</sup> applying complete-linkage method with Euclidean distance.

Gene Set Enrichment Analysis (GSEA, <http://www.broad.mit.edu/gsea/index.jsp>) was performed with GSEA-3 and 1000 phenotype permutations on all detected probes. In presence of multiple probes per gene, the one with the greatest difference in fold change between phenotypes was included. NOTCH1-related gene sets were either collected from the Molecular Signature Database v6.2 (<http://software.broadinstitute.org/gsea/msigdb>) or manually loaded from published signatures.<sup>6</sup> Gene sets were assessed as significantly enriched in one of the phenotypes if the nominal p value was less than 0.05 and, for multiple hypothesis correction, a FDR-q value less than 0.1.

### **Western blot (WB)**

Total proteins were extracted in RIPA lysis buffer (Santa Cruz Biotechnology, Heidelberg, Germany), quantified through Bradford assay (Bio-Rad) and ran in 4-20% SDS-PAGE precast gels (Bio-Rad) prior to transfer to nitrocellulose membranes (Trans-Blot Turbo pack, Bio-Rad). Immunoblotting was performed with anti-NICD (cleaved NOTCH1 Val1744 D3B8, Cell Signaling Technology, Leiden, The Netherlands), anti-DVL2 (30D2, Cell Signaling Technology) and anti- $\beta$ -actin (AC15, Sigma-Aldrich, Milan, Italy) as loading control. Detection was performed with HRP -conjugated antibodies (Bethil Labs, Montgomery, TX) and ClarityECL (Bio-Rad) on a ChemiDoc Touch Imaging System (Bio-Rad). Image analysis and quantification was performed with ImageLab software (Bio-Rad).

### **Cell Sorting**

CD19+/CD5+ CLL cells from selected *SF3B1*-mutated cases were sorted according to CD20 expression using a PE-conjugated anti-CD20 antibody (clone L27, BD Biosciences, Milan, Italy) utilizing a FACSAriaIII cell sorter (BD Biosciences). High and low gates were set on the distribution tails to include about 15% and no more than 20% of the entire population.

### **Mantle Cell Lymphoma samples and Cell lines**

Mantle Cell Lymphoma samples (CD19+/CD5+/CD23-/BCL1<sup>t(11;14)</sup>) used for CD20 expression comparison derive from diagnostic routine. CLL-like MEC1 cells were obtained by DSMZ and maintained in RPMI1640 medium (Sigma-Aldrich) supplemented with 10% heat-inactivated fetal bovine serum (FBS Superior; Merck). The Notch CSL reporter HEK293 cell line was obtained by BPS Bioscience (San Diego, CA) and maintained according to manufacturer's protocol.

### **DVL2 expression vectors generation**

DVL2 and altDVL2 expression vectors were generated as previously reported<sup>4</sup> by PCR amplification of *DVL2* from a CLL sample bearing the *SF3B1* K700E mutation and subsequent cloning in a pCR3.1-NT/GFP backbone (ThermoFisher Scientific).

### **Transfection of RBPJ (CSL) reporter- HEK293 cell line and luciferase assay**

RBPJ (CSL) reporter- HEK293 cells were seeded at 30% confluency; the day after were transfected using calcium phosphate and 8 $\mu$ g of DVL2 vector. After 48 hours, luciferase was detected using the ONE-Glo Luciferase Assay System (Promega) on a Infinite 1000Pro (TECAN, Männedorf, CH). For western blot analyses, 25 $\mu$ L were taken and subjected to SDS-PAGE as previously reported. For control of NOTCH1

inhibition, cells were treated with 10 $\mu$ M DAPT (D5942, Sigma-Aldrich). Experimental transfections were performed three times in triplicate, while controls were performed three times in duplicate.

#### **Transfection with small interfering RNA (siRNA)**

CLL-like MEC1 cells were transfected with siRNA for *DVL2* (TriFECTa DsiRNA kit hs.Ri.DVL2.13, IDT) using Amaxa Nucleofector, L kit and program C-005(Lonza, Basel, Switzerland). Cells were resuspended in 0.5mL of pre-warmed RPMI+20%FBS, let stand for 15 minutes and seeded in the appropriate volume.

#### **Complement-dependent cytotoxicity (CDC) assay**

For CDC assay, 2x10<sup>5</sup> primary CLL cells were incubated with rituximab (5 $\mu$ g/ml) in a final volume of 150  $\mu$ l for 10 min at room temperature prior to the addition of pooled normal human serum (25%) and a further incubation at 37° C for 1 hour.

#### **Statistical analyses**

For clinical evaluation, TTFT was defined as the time between diagnosis and initiation of first therapy. Patients who did not receive any treatment were censored at their last confirmed treatment-free follow-up date. Probability of treatment was estimated by the Kaplan–Meier method, and patients alive and untreated were censored at the last follow-up. The log-rank test was used to compare probabilities between subgroups.

#### **References**

1. Kim D, Langmead B, Salzberg SL. HISAT: a fast spliced aligner with low memory requirements. *Nat Methods* 2015;12:357-360.
2. Thorvaldsdottir H, Robinson JT, Mesirov JP. Integrative Genomics Viewer (IGV): high-performance genomics data visualization and exploration. *Brief.Bioinform.* 2013;14:178-192.
3. Wang L, Brooks AN, Fan J et al. Transcriptomic Characterization of SF3B1 Mutation Reveals Its Pleiotropic Effects in Chronic Lymphocytic Leukemia. *Cancer Cell.* 2016;30:750-763.
4. Pozzo F, Bittolo T, Vendramini E et al. NOTCH1-mutated chronic lymphocytic leukemia cells are characterized by a MYC-related overexpression of nucleophosmin 1 and ribosome-associated components. *Leukemia.* 2017;10.
5. de Hoon, M. J., et al. Open source clustering software. *Bioinformatics* 2004;20:1453-1454.
6. Fabbri G, Holmes AB, Viganotti M et al. Common nonmutational NOTCH1 activation in chronic lymphocytic leukemia. *Proc.Natl.Acad.Sci.U.S.A.* 2017;114:E2911-E2919.

## Supplementary Figure Legends.

### Supplementary Figure 1. Analysis of Time-to-First-treatment.

(A) Upper panel: Kaplan-Meier survival analysis for Time-to-First-Treatment in 180 CLL cases with unmutated (UM) IGHV status and mutations of *SF3B1* (n= 24), *NOTCH1* (n=46) or none of them (WT, n=110; p=0.0244, Log-rank test); Lower panel: Kaplan-Meier survival analysis for Time-to-First-Treatment in 195 CLL cases with mutated (M) IGHV status and mutations of *SF3B1* (n= 10), *NOTCH1* (n=5) or none of them (WT, n=180; p=0.0285, Log-rank test). (B) Kaplan-Meier survival analysis for Time-to-First-Treatment in 382 CLL cases, as from Figure 1C, dissecting the contribution of cases with concomitant mutations of *SF3B1* and *NOTCH1* (n=3; p<0.0001, Log-rank test).

### Supplementary Figure 2: Analysis of CD20 expression.

(A) Box-and-whiskers plots showing CD20 expression in Mantle Cell Lymphoma cells (MCL, n=13), normal B cells (n=26) or CLL (n=537), further dissected for the presence (n=121) or absence (n=416) trisomy 12. (B) Pie plot showing frequency of *SF3B1* and *NOTCH1* mutations in 537 CLL cases with respect of trisomy 12. Percentages are relative to the number of cases within the trisomy 12/non-trisomy 12 categories. (C) Gating strategy for analysis of the CD20dim population. P1 denotes a linear gate from peak value comprising the whole CD20-bright population (black area); dashed line indicates subtraction of P1 from residual population, mirrored from the right side of the histogram; grey area indicates the differential area between the left and the right sides corresponding to the CD20dim population. (D) Prototypical CD20 expression of two CLL cases with a homogeneous (left panel) or heterogeneous (right panel) CD20 expression. The histogram within the P1 gate is indicated in black, the CD20dim fraction is indicated in grey. The corresponding CD19/CD20 dot-plot is reported below. (E) Stability of CD20dim fraction in consecutive samples of 10 untreated CLL cases; upper panel: absolute CD20dim fraction values; lower panel: absolute difference of CD20dim fraction at each timepoint from initial sample, black line represents the mean value at each timepoint, error bars represent standard deviation. (F) Expression of CD20 MFI and CD20dim fraction as determined by flow cytometry in *SF3B1*-mut (*SF3B1*, n=42), *NOTCH1*-mut (*NOTCH1*, n=41), *SF3B1/NOTCH1*-mut (*SF3B1*+*NOTCH1*, n=6) or unmutated (WT, n=327) CLL cases. (G) Expression of CD20 MFI and CD20dim fraction as determined by flow cytometry or RT-qPCR in *SF3B1*-mut (*SF3B1*, n=6), *NOTCH1*-mut (*NOTCH1*, n=36) or unmutated (WT, n=79) CLL cases with trisomy 12. MFI, mean fluorescence intensity. Data are shown by Tukey's box and whisker plots. Outliers indicate data outside the 1.5 interquartile range. \* p≤0.05, \*\* p≤0.01, \*\*\* p≤0.001, n.s. not significant, as determined by two-sided Mann-Whitney rank-test.

**Supplementary Figure 3: Gene expression profile.** (A) Heat map generated with 1274 known genes (see Table S4) found to be differentially expressed between *NOTCH1*-mut (n=6) and WT (n=13) cases and applied to all cases including *SF3B1*-mut cases (n=9) for unsupervised clustering. (B) Heat map generated with 443 known genes (see Table S3) found to be differentially expressed between *SF3B1*-mut (n=9) and WT (n=13) cases and applied to all cases including *NOTCH1*-mut cases (n=6) for unsupervised clustering. Color codes for gene expression values refer to mean centered log-ratio values. (C) Validation of microarray results: log2 ratios of array data of selected genes are plotted in comparison with log2 of Efficiency<sup>-ΔCt</sup> values obtained from RT-qPCR using hydrolysis probes. (D) *MS4A1* expression as determined by RT-qPCR in the GEP samples; data are shown by Tukey's box and whisker plots. \*\*\* p≤0.001, n.s. not significant, as determined by two-sided Mann-Whitney rank-test.

**Supplementary Figure 4: GSEA analysis of NOTCH1-related datasets.** (A-B) GSEA enrichment plots of NOTCH1-related datasets depicting a significant enrichment of the NOTCH1 pathway in *NOTCH1*-mut cases (A) and *SF3B1*-mut cases (B). A brief description of each datasets is provided in Table S5. Reported are the heatmaps relative to the FABBRI\_NOTCH\_SIGNALING gene set.

**Supplementary Figure 5. Analysis of NICD expression.** (A) Immunoblot of the NOTCH1 intracytoplasmic domain (NICD) in WT (n=15), *SF3B1*-mut (n=13) and *NOTCH1*-mut (n=7) cases.  $\beta$ -actin was used as loading control. Plus symbols indicate NICD staining positivity according to densitometric evaluation. Asterisk denotes a *NOTCH1*-mut sample loaded in both gels to normalize densitometric signals. Letter T denotes the *NOTCH1*-mut sample with the lowest normalized NICD intensity used as threshold for positivity. (B) Transcript expression of the NOTCH1 target genes *DTX1* and *CD300A* in the WB cohort, according to NICD staining positivity.

**Supplementary Figure 6: *SF3B1* mutations induce alternative splicing.** (A) Depiction of alternative splicing events triggered by *SF3B1* mutations on *GCC2* and *MAP3K7* as from IGV software. Gapped alignments are presented in light blue. Blue and red arches represent canonical and alternative splicing events, respectively. (B) Fraction of alternatively spliced isoforms in *SF3B1*-mut (n=34) or WT (n=39) cases. (C) Correlation of *altDVL2* fraction determined either by NGS or RT-qPCR. The Spearman's rank correlation coefficient ( $\rho$ ) and p-value are reported for *SF3B1*-mut (n=34) cases. WT cases (n=39) are reported for comparison. (D) *altDVL2* expression in relation with *SF3B1* mutations according to the mutated amino-acid residue and burden (n=35). WT cases (n=155) are reported for comparison. See also Figure 4D. (E) Expression of total *DVL2* transcript expression in *SF3B1*-mut (*SF3B1*, n=35), *NOTCH1*-mut (*NOTCH1*, n=32) or unmutated (WT, n=155) CLL cases. Data are shown by Tukey's box and whisker plots. Outliers indicate data outside the 1.5 interquartile range. \*\*\*  $p \leq 0.001$ , n.s. not significant, as determined by two-sided Mann-Whitney rank-test.

**Supplementary Figure 7: Correlation between NOTCH1 signaling, *DVL2* expression and CD20 downregulation.** (A) Activity of the NOTCH1 pathway in a HEK293-CSL reporter cell line with constitutively active signaling, transfected with either a wild-type *DVL2* or *altDVL2*. Controls include transfection with no DNA (Mock), treatment with the gamma-secretase inhibitor DAPT, no transfection (Pos ctrl) and no luciferase reagent (No Luc). Mock vs. *DVL2*,  $p=0.0244$ ; Mock vs. *altDVL2*,  $p=0.96$ ; *DVL2* vs. *altDVL2*,  $p=0.0040$ . RLU: Relative Luciferase Units. Transfections were performed three times in triplicate, while controls were performed three times in duplicate. Data are shown by Tukey's box and whisker plots. Outliers indicate data outside the 1.5 interquartile range. Right panel: western blot analyses for transfection of *DVL2/altDVL2* in transfected cells. (B) Density plots (log10 density) of *DTX1* expression versus CD20dim fraction for WT (n=155), *SF3B1*-mut (n=35) and *NOTCH1*-mut (n=32) cases. Quadrant gates were set at the modal value of each parameter for WT cases; population frequency of each quadrant is reported. (C) Transcript expression of *MS4A1* determined by RT-qPCR (left panel) and *SF3B1* variant allele frequency determined by NGS in the CD20-High and CD20-Low subpopulations of sorted samples (n=9). Data are shown as dot-and-line diagrams. (D) Correlation between CD20 expression and percentage of relative lysis by complement-dependent cytotoxicity in *SF3B1*-mut, *NOTCH1*-mut and WT CLL cases. The Spearman's rank correlation coefficient ( $\rho$ ) and p-value are reported.  
\*  $p \leq 0.05$ , \*\*  $p \leq 0.01$ , \*\*\*  $p \leq 0.001$ , n.s. not significant, as determined by two-sided Mann-Whitney rank-test.

## Supplementary Figure 1

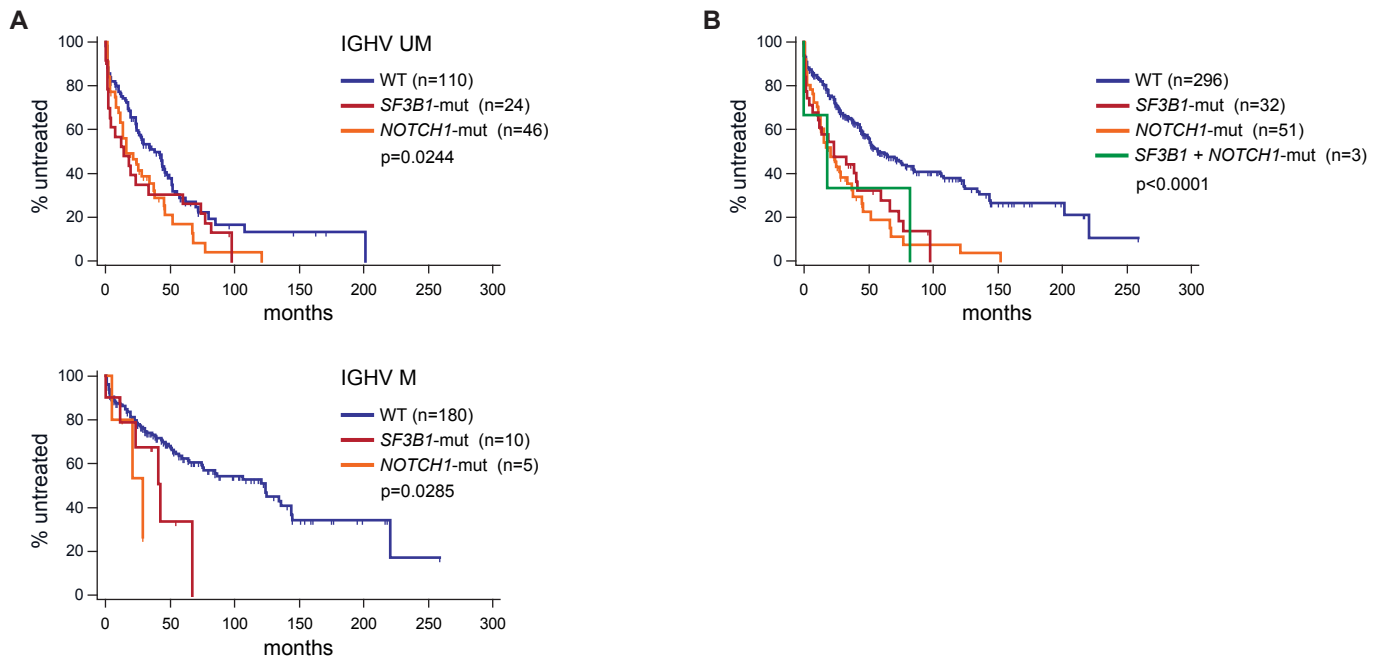

**Supplementary Figure 1: Analysis of Time-to-First-treatment.** (A) Upper panel: Kaplan-Meier survival analysis for Time-to-First-Treatment in 180 CLL cases with unmutated (UM) IGHV status and mutations of *SF3B1* (n=24), *NOTCH1* (n=46) or none of them (WT, n=110; p=0.0244, Log-rank test). Lower panel: Kaplan-Meier survival analysis for Time-to-First-Treatment in 195 CLL cases with mutated (M) IGHV status and mutations of *SF3B1* (n=10), *NOTCH1* (n=5) or none of them (WT, n=180; p=0.0285, Log-rank test); (B) Kaplan-Meier survival analysis for Time-to-First-Treatment in 382 CLL cases, as from Figure 1C, dissecting the contribution of cases with concomitant mutations of *SF3B1* and *NOTCH1* (n=3; p<0.0001, Log-rank test).



## Supplementary Figure 2

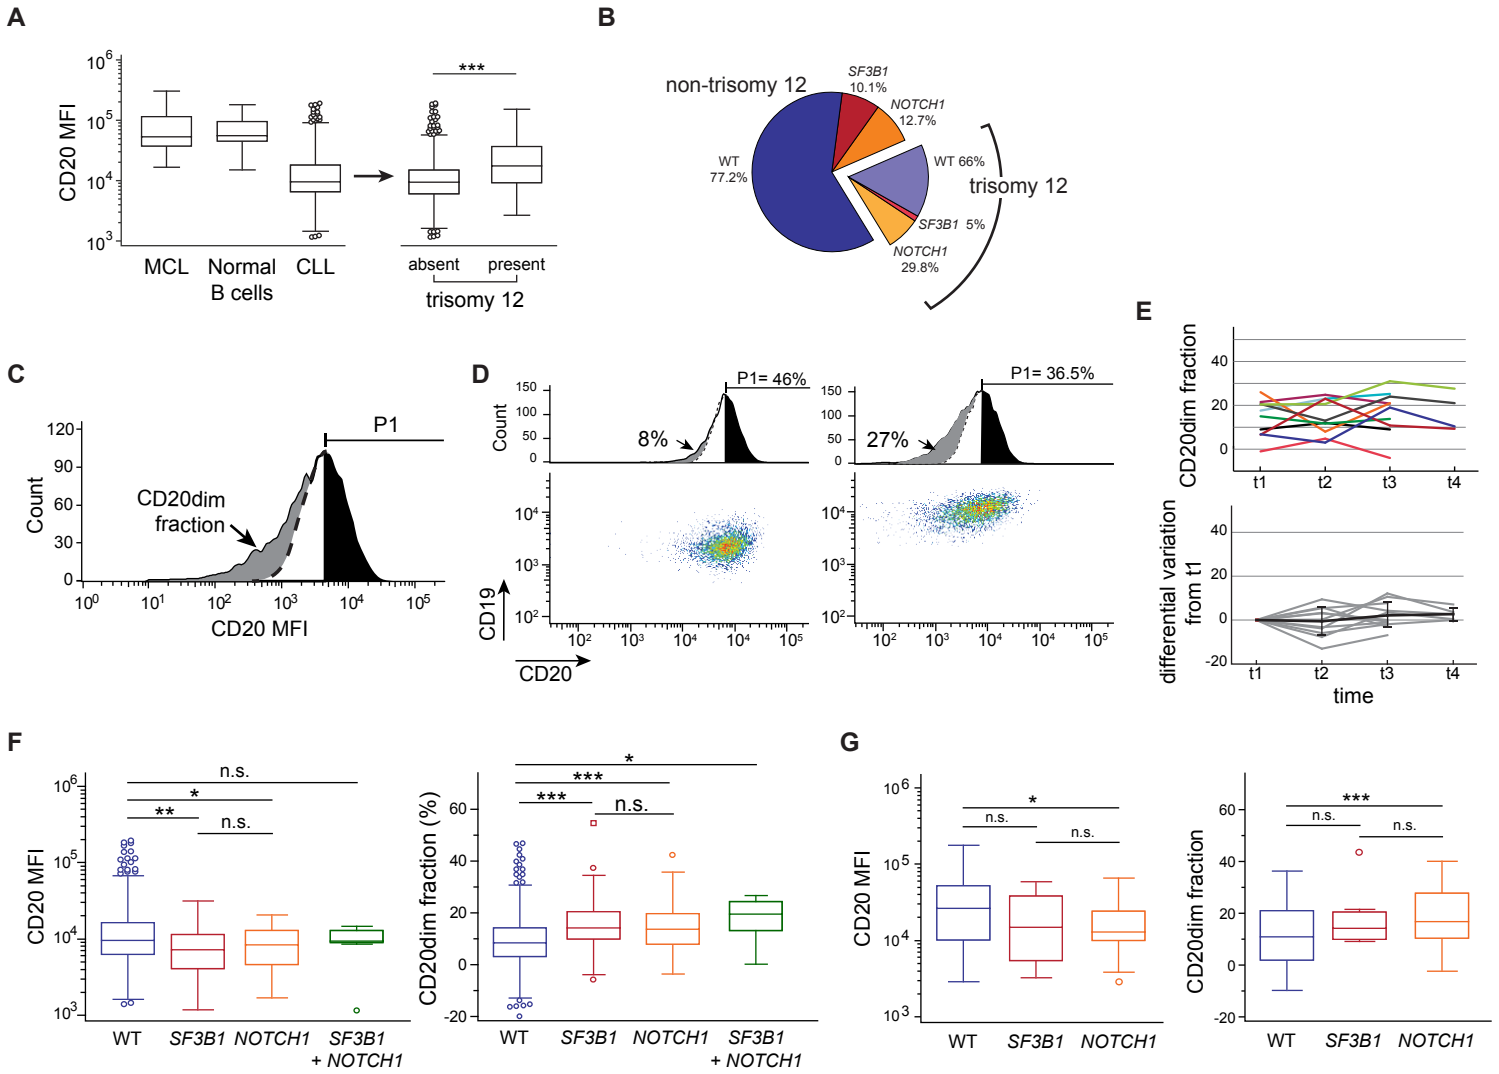

**Supplementary Figure 2: Analysis of CD20 expression.** (A) Box-and-whiskers plots showing CD20 expression in Mantle Cell Lymphoma cells (MCL, n=13), normal B cells (n=26) or CLL (n=537), further dissected for the presence (n=121) or absence (n=416) trisomy 12. (B) Pie plot showing frequency of *SF3B1* and *NOTCH1* mutations in 537 CLL cases with respect of trisomy 12. Percentages are relative to the number of cases within the trisomy 12/non-trisomy 12 categories. (C) Gating strategy for analysis of the CD20dim population. P1 denotes a linear gate from peak value comprising the whole CD20-bright population (black area); dashed line indicates subtraction of P1 from residual population, mirrored from the right side of the histogram; grey area indicates the differential area between the left and the right sides corresponding to the CD20dim population. (D) Prototypical CD20 expression of two CLL cases with a homogeneous (left panel) or heterogeneous (right panel) CD20 expression. The histogram within the P1 gate is indicated in black, the CD20dim fraction is indicated in grey. The corresponding CD19-CD20 dot-plot is reported below. (E) Stability of CD20dim fraction in consecutive samples of 10 untreated CLL cases; upper panel: absolute CD20dim fraction values; lower panel: absolute difference of CD20dim fraction at each timepoint from initial sample, black line represents the mean value at each timepoint, error bars represent standard deviation. (F) Expression of CD20 MFI and CD20dim fraction as determined by flow cytometry in *SF3B1*-mut (*SF3B1*, n=42), *NOTCH1*-mut (*NOTCH1*, n=41), *SF3B1/NOTCH1*-mut (*SF3B1*+*NOTCH1*, n=6) or unmutated (WT, n=327) CLL cases. (G) Expression of CD20 MFI and CD20dim fraction as determined by flow cytometry in *SF3B1*-mut (*SF3B1*, n=6), *NOTCH1*-mut (*NOTCH1*, n=36) or unmutated (WT, n=79) CLL cases with trisomy 12. MFI, mean fluorescence intensity. Data are shown by Tukey's box and whisker plots. Outliers indicate data outside the 1.5 interquartile range. \* p<0.05, \*\* p<0.01, \*\*\* p<0.001, n.s. not significant, as determined by two-sided Mann-Whitney rank-test.

Supplementary Figure 3

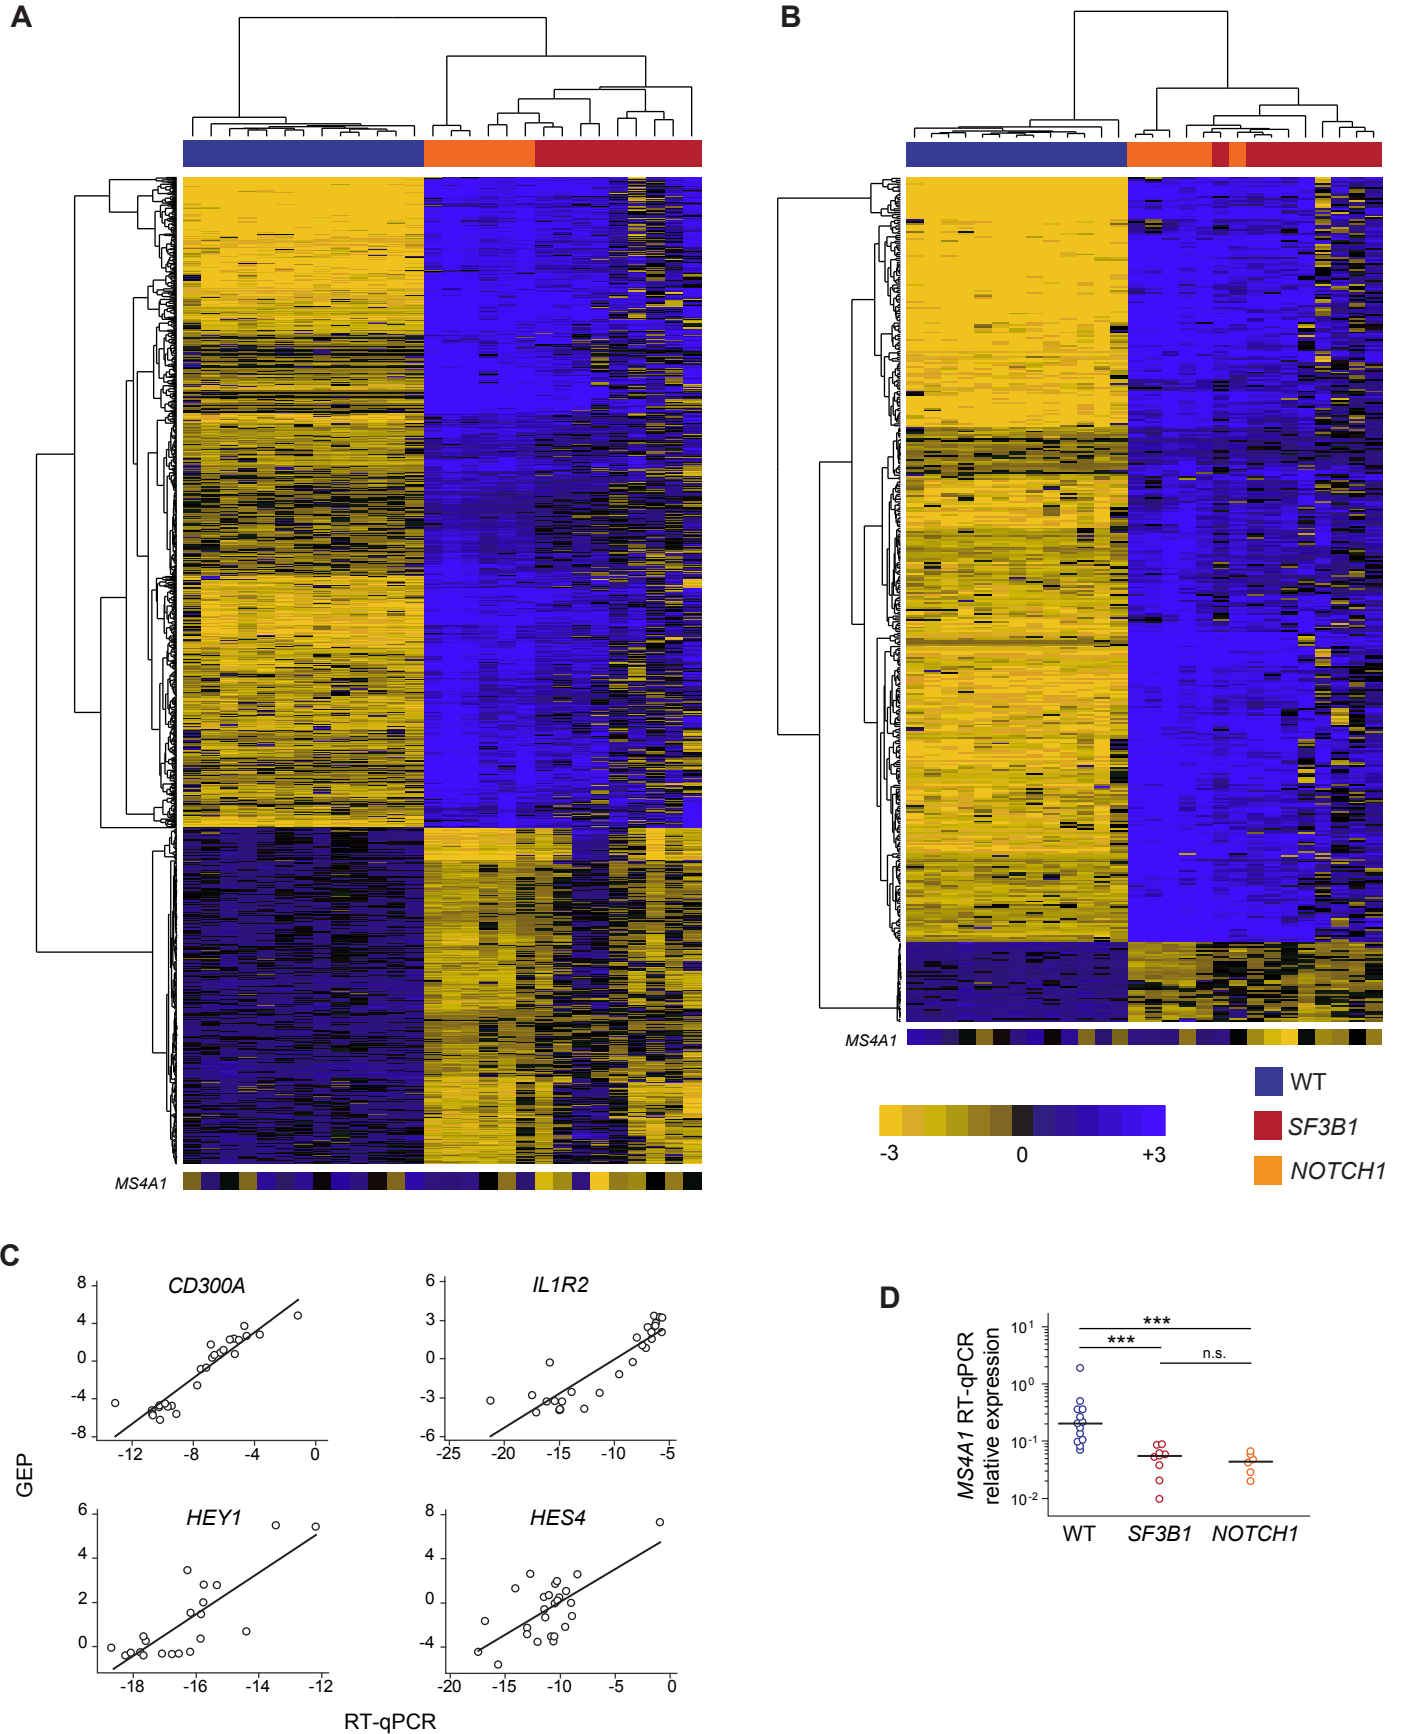

**Supplementary Figure 3: Gene expression profile.** (A) Heat map generated with 1274 known genes (see Table S4) found to be differentially expressed between *NOTCH1*-mut (*NOTCH1*, n=6) and WT (n=13) cases and applied to all cases including *SF3B1*-mut cases (n=9) for unsupervised clustering. (B) Heat map generated with 443 known genes (see Table S3) found to be differentially expressed between *SF3B1*-mut (*SF3B1*, n=9) and WT (n=13) cases and applied to all cases including *NOTCH1*-mut cases (n=6) for unsupervised clustering. The inset row corresponds to the probe to *MS4A1*. Color codes for gene expression values refer to mean centered log<sub>2</sub>-ratio values. (C) Validation of microarray results: log<sub>2</sub> ratios of array data of selected genes are plotted in comparison with log<sub>2</sub> values obtained from RT-qPCR using hydrolysis probes. (D) *MS4A1* expression as determined by RT-qPCR in the GEP samples; data are shown by Tukey's box and whisker plots. \*\*\* p≤0.001, n.s. not significant, as determined by two-sided Mann-Whitney rank-test.

Supplementary Figure 4

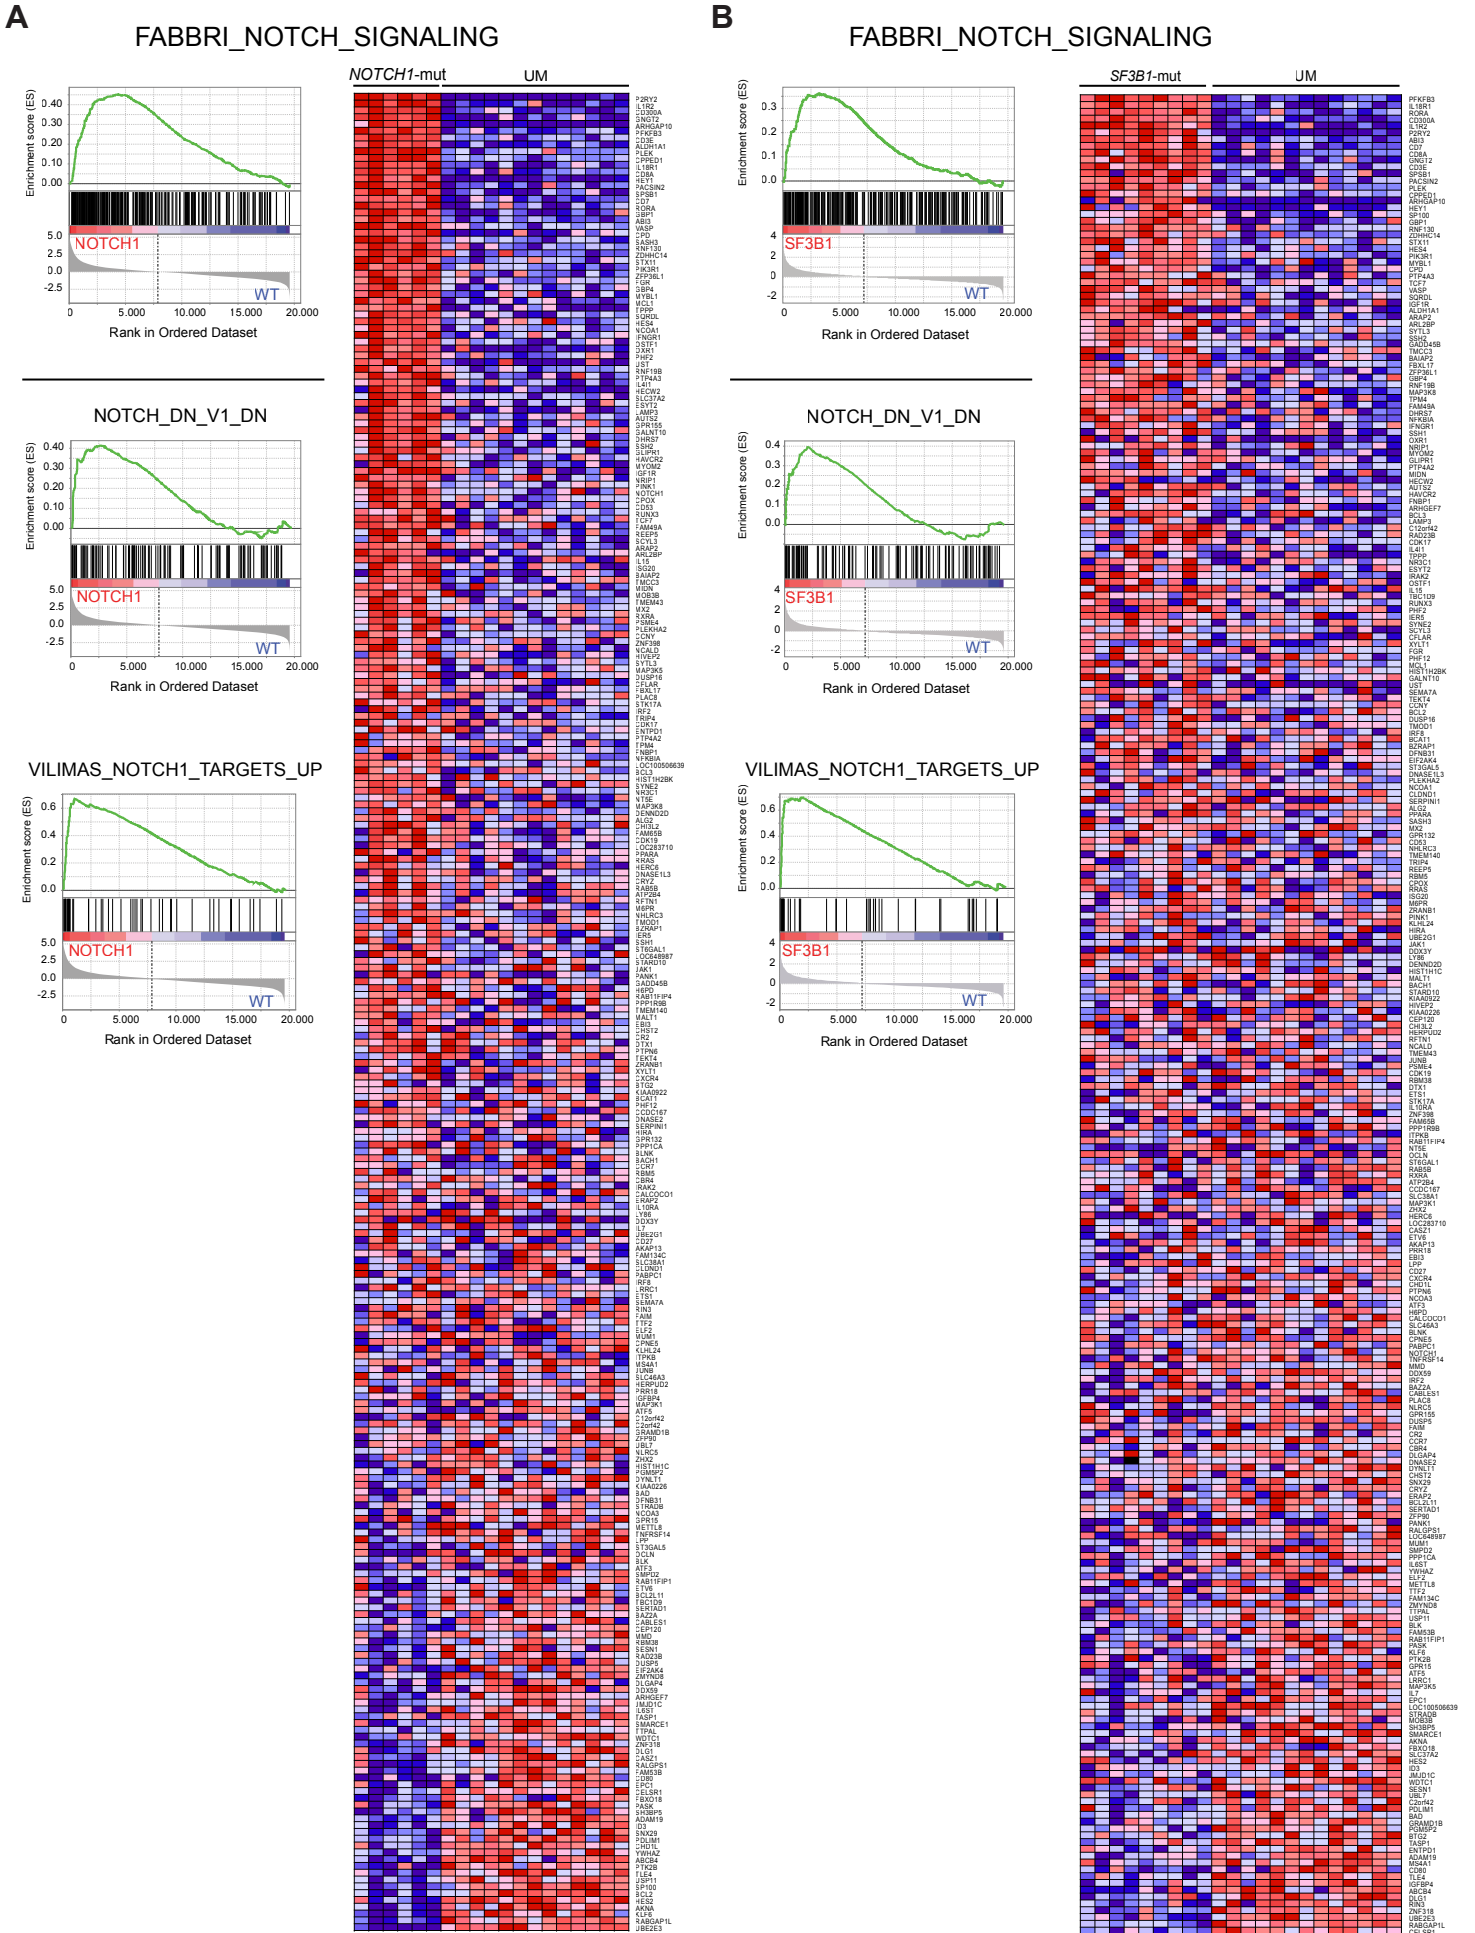

Supplementary Figure 4: GSEA analysis of NOTCH1-related datasets. (A-B) GSEA enrichment plots of NOTCH1-related datasets depicting a significant enrichment of the NOTCH1 pathway in *NOTCH1*-mut cases (A) and *SF3B1*-mut cases (B). A brief description of each datasets is provided in Table S5. Reported are the heatmaps relative to the FABBRI\_NOTCH\_SIGNALING gene set.

## Supplementary Figure 5

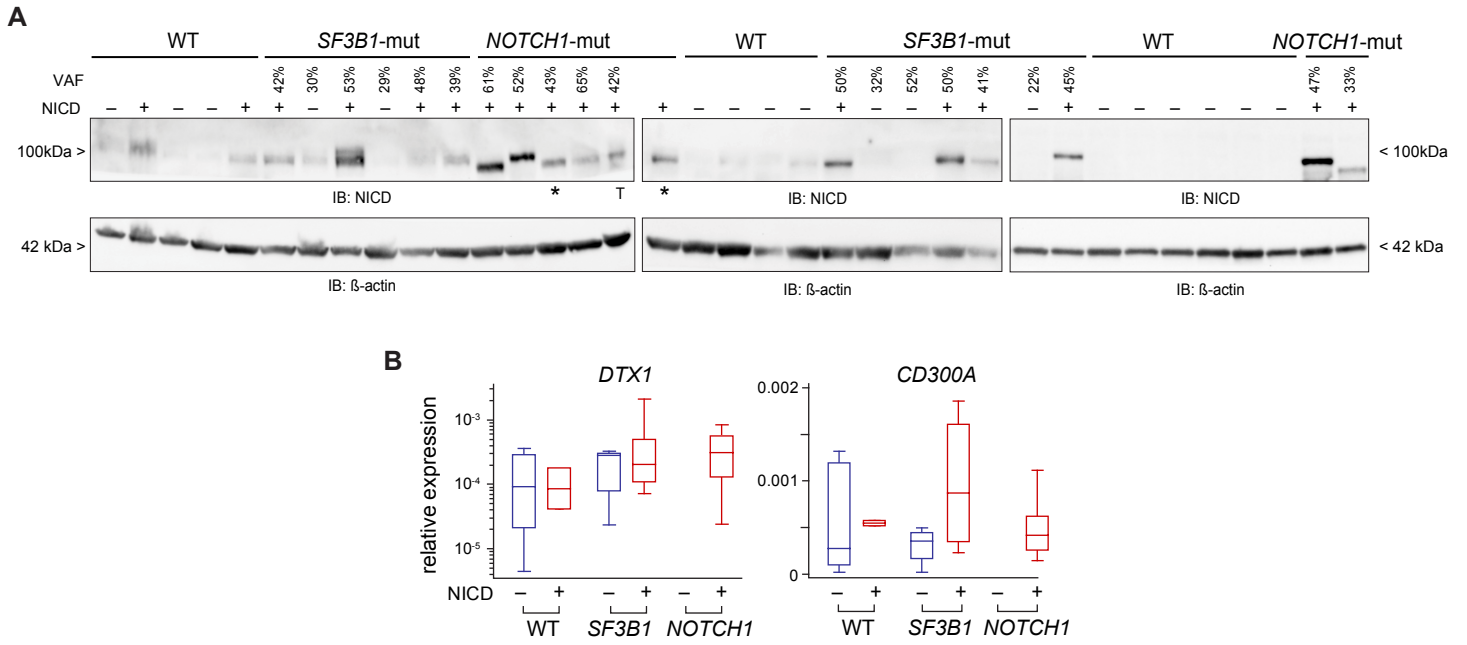

**Supplementary Figure 5. Analysis of NICD expression.** (A) Immunoblot of the NOTCH1 intracytoplasmic domain (NICD) in WT (n=15), *SF3B1*-mut (n=13) and *NOTCH1*-mut (n=7) cases.  $\beta$ -actin was used as loading control. Plus symbols indicate NICD staining positivity according to densitometric evaluation. Asterisk denotes a *NOTCH1*-mut sample loaded in both gels to normalize densitometric signals. Letter T denotes the *NOTCH1*-mut sample with the lowest normalized NICD intensity used as threshold for positivity. (B) Transcript expression of the NOTCH1 target genes *DTX1* and *CD300A* in the WB cohort, according to NICD staining positivity.

Supplementary Figure 6

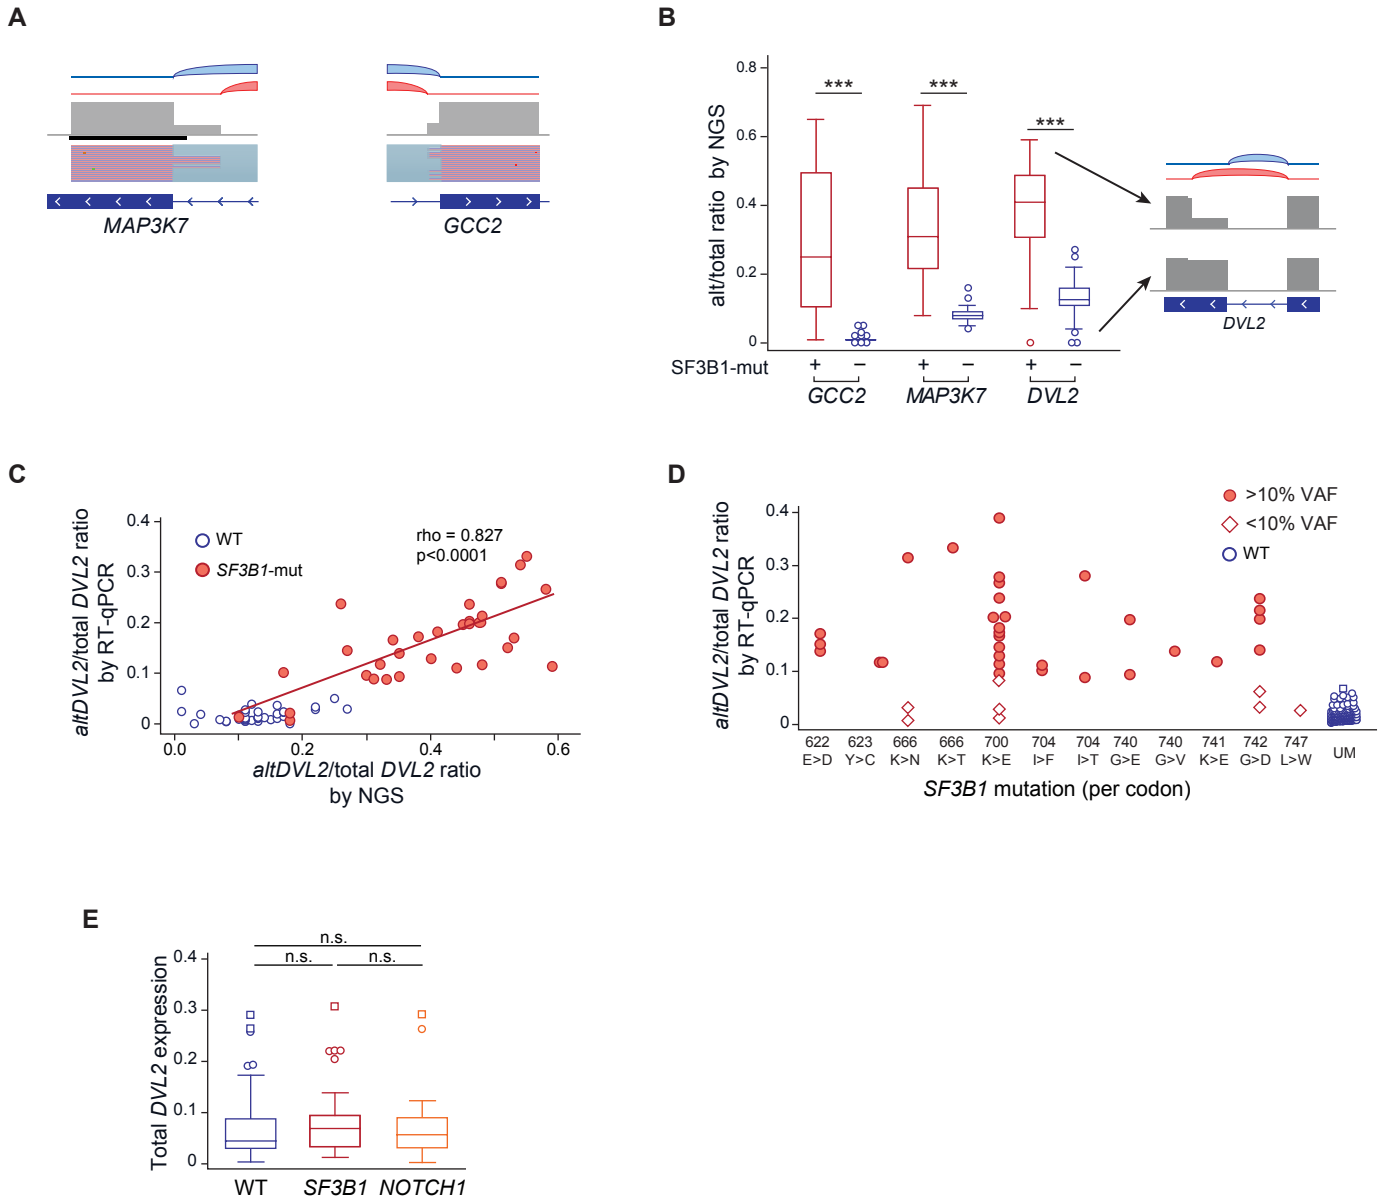

**Supplementary Figure 6: SF3B1 mutations induce alternative splicing.** (A) Depiction of alternative splicing events triggered by *SF3B1* mutations on *GCC2* and *MAP3K7* as from IGV software. Gapped alignments are presented in light blue. Blue and red arches represent canonical and alternative splicing events, respectively. (B) Fraction of alternatively spliced isoforms in *SF3B1*-mut (n=34) or WT (n=39) cases. (C) Correlation of *altDVL2* fraction determined either by NGS or RT-qPCR. The Spearman's rank correlation coefficient ( $\rho$ ) and p-value are reported for *SF3B1*-mut (n=34) cases. WT cases (n=39) are reported for comparison. (D) *altDVL2* expression in relation with *SF3B1* mutations according to the mutated amino-acidic residue and burden (n=35). WT cases (n=155) are reported for comparison. Horizontal line represents the median. See also Figure 2D. (E) Expression of total *DVL2* transcript expression in *SF3B1*-mut (*SF3B1*, n=35), *NOTCH1*-mut (*NOTCH1*, n=32) or unmutated (WT, n=155) CLL cases. Data are shown by Tukey's box and whisker plots. Outliers indicate data outside the 1.5 interquartile range. \*  $p \leq 0.05$ , \*\*  $p \leq 0.01$ , \*\*\*  $p \leq 0.001$ , n.s. not significant, as determined by two-sided Mann-Whitney rank-test.

## Supplementary Figure 7

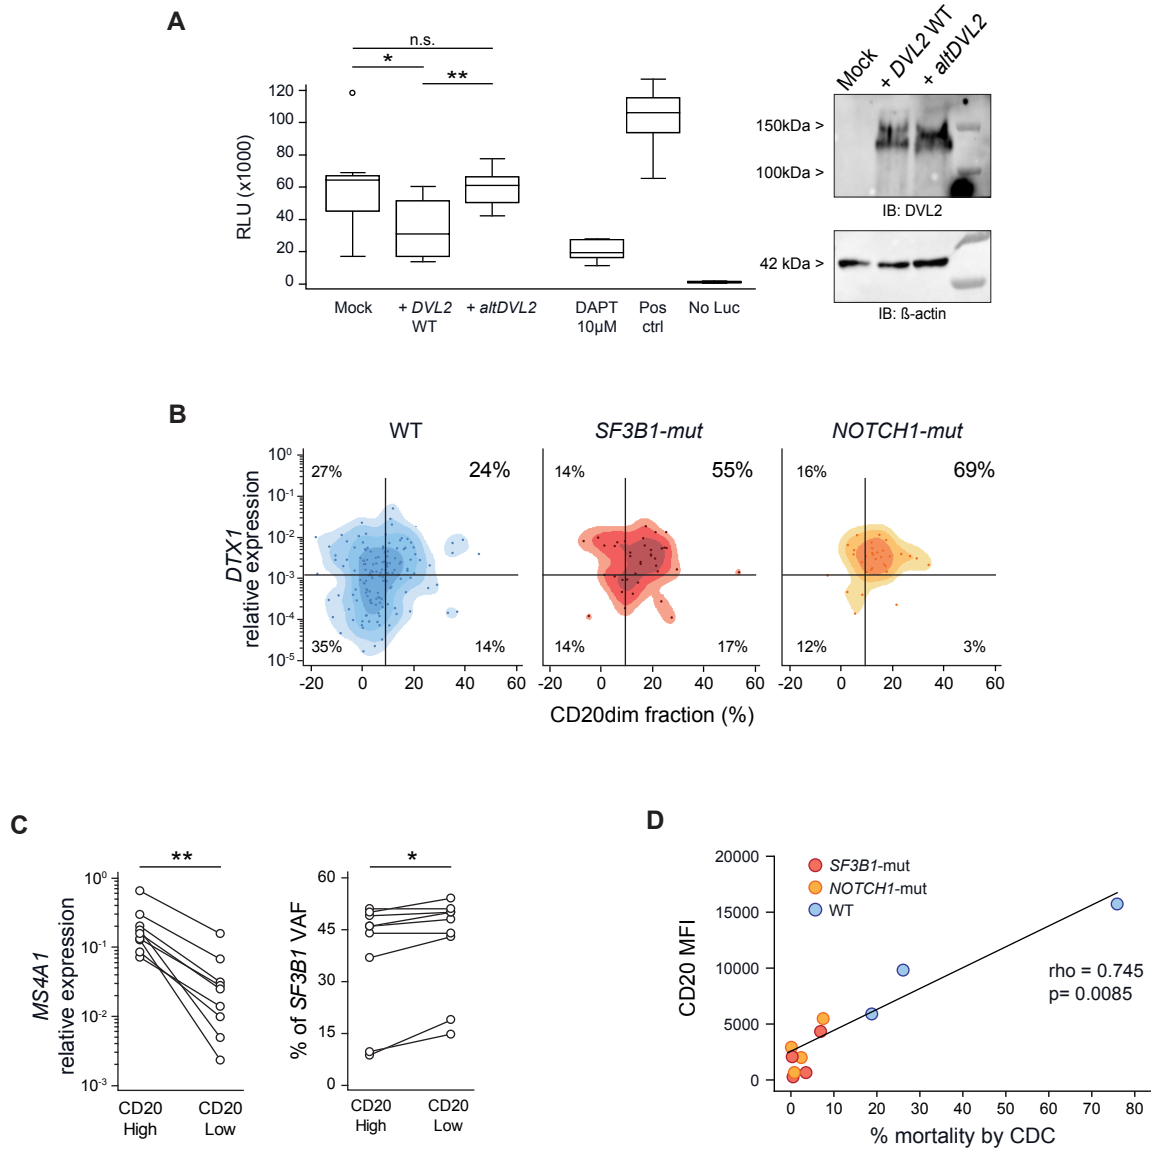

**Supplementary Figure 7: Correlation between NOTCH1 signaling, DVL2 expression and CD20 downregulation.** (A) Activity of the NOTCH1 pathway in a HEK293-CSL reporter cell line with constitutively active signaling, transfected with either a wild-type *DVL2* or *altDVL2*. Controls include transfection with no DNA (Mock), treatment with the gamma-secretase inhibitor DAPT, no transfection (Pos ctrl) and no luciferase reagent (No Luc). Mock vs. *DVL2*, p=0.0244; Mock vs. *altDVL2*, p=0.96; *DVL2* vs. *altDVL2*, p= 0.0040. RLU: Relative Luciferase Units. Transfections were performed three times in triplicate, while controls were performed three times in duplicate. Data are shown by Tukey's box and whisker plots. Outliers indicate data outside the 1.5 interquartile range. Right panel: western blot analyses for transfection of *DVL2/altDVL2* in transfected cells. (B) Density plots (log10 density) of *DTX1* expression versus CD20dim fraction for WT (n=155), *SF3B1-mut* (n=35) and *NOTCH1-mut* (n=32) cases. Quadrant gates were set at the modal value of each parameter for WT cases; population frequency of each quadrant is reported. (C) Transcript expression of *MS4A1* determined by RT-qPCR (left panel) and *SF3B1* variant allele frequency determined by NGS in the CD20-High and CD20-Low subpopulations of sorted samples (n=9). Data are shown as dot-and-line diagrams. (D) Correlation between CD20 expression and percentage of relative lysis by complement-dependent cytotoxicity in *SF3B1-mut*, *NOTCH1-mut* and WT CLL cases. The Spearman's rank correlation coefficient (rho) and p-value are reported. \* p<0.05, \*\* p<0.01, \*\*\* p<0.001, n.s. not significant, as determined by two-sided Mann-Whitney rank-test.

Supplementary Table 1. Biological characterization of the CLL cohort (537 cases).

| ID   | FISH <sup>A</sup> | Trisomy 12 | IGHV <sup>B</sup> | SF3B1 status <sup>C</sup> | NOTCH1 status <sup>C</sup>         | TP53 status <sup>C</sup> | CD20 MFI | CD20dim fraction (%) |
|------|-------------------|------------|-------------------|---------------------------|------------------------------------|--------------------------|----------|----------------------|
| 2469 | del11q            | absent     | UM                | wt                        | wt                                 | mut                      | 76203    | 2,4                  |
| 2473 | del17p            | present    | UM                | wt                        | p.P2514Rfs*4 17%;<br>p.L2457V 2.7% | wt                       | 6619     | 19,2                 |
| 2476 | tris12            | present    | M                 | wt                        | wt                                 | wt                       | 84636    | 1                    |
| 2480 | del11q            | absent     | UM                | wt                        | wt                                 | wt                       | 5243     | 27                   |
| 2483 | del17p            | absent     | UM                | wt                        | wt                                 | wt                       | 10456    | 28,2                 |
| 2495 | del11q            | present    | UM                | wt                        | p.P2514Rfs*4 3.3%                  | n.a.                     | 16262    | 7,4                  |
| 2496 | del17p            | absent     | M                 | wt                        | wt                                 | mut                      | 1397     | 12,6                 |
| 2499 | del13q            | absent     | M                 | wt                        | wt                                 | wt                       | 14526    | 11,2                 |
| 2521 | del11q            | absent     | n.a.              | p.G742D 17%               | p.P2514Rfs*4 30%                   | wt                       | 9828     | 29,4                 |
| 2526 | del13q            | absent     | M                 | wt                        | wt                                 | wt                       | 6530     | 8,6                  |
| 2528 | tris12            | present    | M                 | wt                        | wt                                 | wt                       | 113087   | 3,2                  |
| 2530 | tris12            | present    | n.a.              | wt                        | p.P2514Rfs*4 37.5%                 | wt                       | 10013    | 16                   |
| 2548 | del13q            | absent     | M                 | wt                        | wt                                 | wt                       | 5284     | 13,6                 |
| 2561 | del13q            | absent     | M                 | wt                        | wt                                 | wt                       | 14899    | 14,2                 |
| 2581 | tris12            | present    | UM                | wt                        | wt                                 | wt                       | 2820     | 33                   |
| 2586 | del11q            | absent     | UM                | wt                        | p.Q2444* 17%                       | wt                       | 4240     | 50,4                 |
| 2598 | normal            | absent     | M                 | wt                        | p.P2514Rfs*4 35%                   | wt                       | 7576     | 34,4                 |
| 2601 | tris12            | present    | M                 | wt                        | p.P2514Rfs*4 11.8%                 | wt                       | 27337    | 12,8                 |
| 2604 | del13q            | absent     | UM                | p.K700E 22%               | wt                                 | wt                       | 2606     | 31,4                 |
| 2607 | tris12            | present    | M                 | wt                        | wt                                 | wt                       | 25350    | 8,4                  |
| 2612 | del17p            | absent     | UM                | wt                        | wt                                 | wt                       | 7421     | 14                   |
| 2621 | del13q            | absent     | UM                | wt                        | wt                                 | wt                       | 7695     | 4,4                  |
| 2622 | del17p            | absent     | UM                | wt                        | p.P2514Rfs*4 1.59%                 | mut                      | 1738     | 41,6                 |
| 2623 | tris12            | present    | UM                | wt                        | wt                                 | wt                       | 32150    | 10,4                 |
| 2630 | tris12            | present    | UM                | p.K666R 7%                | wt                                 | wt                       | 4796     | 9,8                  |
| 2631 | normal            | absent     | UM                | wt                        | wt                                 | wt                       | 6094     | 17,2                 |
| 2635 | tris12            | present    | UM                | wt                        | wt                                 | mut                      | 7961     | 20,8                 |
| 2649 | tris12            | present    | UM                | wt                        | p.P2514Rfs*4 18.5%                 | n.a.                     | 11168    | 36                   |
| 2655 | del11q            | absent     | UM                | wt                        | wt                                 | wt                       | 7687     | 12,6                 |
| 2660 | del13q            | absent     | M                 | wt                        | wt                                 | wt                       | 6779     | 9,6                  |
| 2663 | del11q            | absent     | UM                | wt                        | wt                                 | wt                       | 3590     | 45,6                 |
| 2674 | tris12            | present    | M                 | wt                        | wt                                 | wt                       | 4957     | 11,8                 |
| 2682 | normal            | absent     | UM                | p.K700E 21%               | p.P2514Rfs*4 20.9%                 | wt                       | 1182     | 58,8                 |
| 2685 | del11q            | absent     | UM                | wt                        | wt                                 | wt                       | 4994     | 35                   |
| 2688 | del13q            | absent     | M                 | wt                        | wt                                 | wt                       | 15304    | 15                   |
| 2690 | tris12            | present    | M                 | wt                        | wt                                 | wt                       | 102820   | 9,4                  |
| 2692 | tris12            | present    | UM                | wt                        | wt                                 | wt                       | 13203    | 21                   |
| 2703 | del17p            | absent     | UM                | wt                        | wt                                 | mut                      | 6574     | 21,6                 |
| 2707 | tris12            | present    | UM                | wt                        | p.P2514Rfs*4 61%                   | wt                       | 31230    | 7                    |
| 2710 | del11q            | absent     | UM                | wt                        | wt                                 | wt                       | 7030     | 44,8                 |
| 2714 | del17p            | absent     | M                 | wt                        | wt                                 | mut                      | 53604    | 5,4                  |
| 2715 | del13q            | absent     | n.a.              | wt                        | wt                                 | wt                       | 6432     | 12,6                 |
| 2717 | del13q            | absent     | UM                | wt                        | wt                                 | wt                       | 4279     | 26,4                 |
| 2719 | del13q            | absent     | UM                | wt                        | wt                                 | wt                       | 12289    | 13,2                 |
| 2723 | del13q            | absent     | M                 | wt                        | wt                                 | wt                       | 4949     | 13,6                 |
| 2730 | del11q            | absent     | UM                | wt                        | wt                                 | n.a.                     | 9421     | 16,8                 |
| 2731 | tris12            | present    | M                 | wt                        | wt                                 | mut                      | 13518    | 13                   |
| 2735 | tris12            | present    | UM                | wt                        | wt                                 | wt                       | 3110     | 36                   |
| 2738 | tris12            | present    | UM                | wt                        | wt                                 | wt                       | 6401     | 22                   |
| 2741 | tris12            | present    | UM                | wt                        | wt                                 | wt                       | 3125     | 24                   |
| 2749 | normal            | absent     | M                 | wt                        | wt                                 | wt                       | 9620     | 9,8                  |
| 2750 | normal            | absent     | M                 | wt                        | wt                                 | wt                       | 4694     | 30                   |
| 2757 | del13q            | absent     | M                 | wt                        | wt                                 | wt                       | 13437    | 13,4                 |
| 2759 | normal            | absent     | n.a.              | wt                        | wt                                 | wt                       | 11252    | 12                   |
| 2763 | del17p            | absent     | M                 | wt                        | wt                                 | mut                      | 54336    | 7,8                  |
| 2764 | normal            | absent     | UM                | wt                        | p.P2514Rfs*4 6%                    | wt                       | 4177     | 33,4                 |
| 2766 | normal            | absent     | M                 | wt                        | wt                                 | wt                       | 6637     | 5,6                  |
| 2768 | del13q            | absent     | UM                | wt                        | p.P2514Rfs*4 15%                   | n.a.                     | 19128    | 25,6                 |
| 2769 | tris12            | present    | M                 | wt                        | wt                                 | wt                       | 73263    | 0,2                  |
| 2770 | del13q            | absent     | UM                | wt                        | wt                                 | wt                       | 8403     | 20,4                 |
| 2774 | tris12            | present    | M                 | wt                        | wt                                 | wt                       | 17437    | 9,4                  |
| 2778 | del13q            | absent     | UM                | p.K741N 35%               | p.P2514Rfs*4 23%                   | wt                       | 9971     | 12,2                 |
| 2782 | tris12            | present    | UM                | wt                        | wt                                 | wt                       | 21315    | 27                   |
| 2786 | normal            | absent     | M                 | wt                        | wt                                 | wt                       | 4530     | 22,2                 |
| 2787 | tris12            | present    | UM                | wt                        | wt                                 | wt                       | 8040     | 24                   |
| 2795 | del17p            | present    | UM                | wt                        | wt                                 | mut                      | 29372    | 14,2                 |
| 2798 | del13q            | absent     | UM                | wt                        | wt                                 | wt                       | 22855    | 25,4                 |
| 2799 | del11q            | absent     | M                 | wt                        | wt                                 | mut                      | 27842    | 6                    |
| 2803 | tris12            | present    | M                 | wt                        | wt                                 | wt                       | 76416    | 1,4                  |
| 2823 | del11q            | absent     | UM                | wt                        | p.P2514Rfs*4 48%                   | wt                       | 4708     | 34,6                 |
| 2825 | del17p            | present    | UM                | wt                        | p.P2514Rfs*4 68%                   | mut                      | 49530    | 28                   |
| 2832 | del13q            | absent     | M                 | p.K700E 6%                | wt                                 | wt                       | 2749     | 25                   |
| 2833 | normal            | absent     | M                 | wt                        | wt                                 | wt                       | 3808     | 36,2                 |
| 2836 | del13q            | absent     | UM                | wt                        | wt                                 | wt                       | 13427    | 9                    |
| 2837 | del11q            | absent     | UM                | wt                        | p.P2514Rfs*4 42%;<br>p.Q2444* 2%   | wt                       | 9679     | 24,2                 |
| 2839 | del13q            | absent     | M                 | wt                        | wt                                 | wt                       | 7264     | 10,4                 |
| 2840 | tris12            | present    | M                 | wt                        | wt                                 | wt                       | 6049     | 21,6                 |
| 2841 | normal            | absent     | M                 | wt                        | wt                                 | wt                       | 13788    | 13,6                 |
| 2842 | del13q            | absent     | M                 | wt                        | wt                                 | wt                       | 15781    | 16,8                 |
| 2843 | del17p            | absent     | M                 | wt                        | wt                                 | mut                      | 43564    | 10,2                 |
| 2845 | normal            | absent     | UM                | wt                        | p.P2514Rfs*4 15%                   | wt                       | 7602     | 25                   |

| ID   | FISH <sup>A</sup> | Trisomy 12 | IGHV <sup>B</sup> | SF3B1 status <sup>C</sup> | NOTCH1 status <sup>C</sup>                                           | TP53 status <sup>C</sup> | CD20 MFI | CD20dim fraction (%) |
|------|-------------------|------------|-------------------|---------------------------|----------------------------------------------------------------------|--------------------------|----------|----------------------|
| 2846 | del13q            | absent     | UM                | wt                        | wt                                                                   | wt                       | 6120     | 9,2                  |
| 2848 | del11q            | absent     | UM                | wt                        | p.P2514Rfs*4 43%                                                     | wt                       | 4471     | 19,8                 |
| 2849 | tris12            | present    | UM                | wt                        | c.*7668+371A>G 52%                                                   | wt                       | 3887     | 28                   |
| 2850 | del13q            | absent     | M                 | wt                        | wt                                                                   | wt                       | 2698     | 8,6                  |
| 2851 | tris12            | present    | UM                | wt                        | wt                                                                   | wt                       | 33202    | 10,8                 |
| 2854 | del13q            | absent     | UM                | wt                        | wt                                                                   | wt                       | 8389     | 14,4                 |
| 2859 | normal            | absent     | M                 | wt                        | wt                                                                   | wt                       | 32455    | 15                   |
| 2862 | tris12            | present    | UM                | wt                        | wt                                                                   | wt                       | 11938    | 4,2                  |
| 2863 | normal            | absent     | UM                | wt                        | wt                                                                   | mut                      | 3520     | 38,8                 |
| 2866 | del13q            | absent     | M                 | wt                        | wt                                                                   | mut                      | 10020    | 31                   |
| 2867 | normal            | absent     | M                 | wt                        | wt                                                                   | wt                       | 43074    | 9,2                  |
| 2868 | normal            | absent     | UM                | p.K700E 18%               | c.*7668+371A>G 25%;<br>p.P2514Rfs*4 1%                               | wt                       | 13350    | 9                    |
| 2869 | del13q            | absent     | M                 | wt                        | wt                                                                   | mut                      | 3877     | 44,6                 |
| 2872 | del13q            | absent     | M                 | wt                        | p.P2514Rfs*4 3%<br>p.F2296fs*56 2%                                   | wt                       | 2625     | 38,8                 |
| 2874 | del13q            | absent     | UM                | wt                        | p.P2514Rfs*4 54%                                                     | mut                      | 4605     | 22                   |
| 2876 | del13q            | absent     | M                 | wt                        | wt                                                                   | wt                       | 35267    | 0,6                  |
| 2877 | del13q            | absent     | UM                | wt                        | p.S2274Pfs*79 50%                                                    | mut                      | 17125    | 21,8                 |
| 2878 | tris12            | present    | UM                | wt                        | wt                                                                   | wt                       | 11674    | 17,6                 |
| 2879 | del13q            | absent     | M                 | wt                        | wt                                                                   | wt                       | 8222     | 11,6                 |
| 2880 | del17p            | present    | UM                | wt                        | p.P2514Rfs*4 81%                                                     | mut                      | 36080    | 21,8                 |
| 2881 | del13q            | absent     | M                 | wt                        | wt                                                                   | wt                       | 7512     | 8                    |
| 2883 | del17p            | absent     | UM                | p.E622D 30%               | wt                                                                   | mut                      | 9424     | 30,2                 |
| 2884 | normal            | absent     | UM                | wt                        | c.*7668+378A>G 16%;<br>p.Q2503* 2%;<br>p.Q2501* 22%;<br>n.Y2490* 11% | wt                       | 9325     | 18,8                 |
| 2887 | del13q            | absent     | M                 | wt                        | wt                                                                   | wt                       | 34485    | 5,4                  |
| 2888 | del13q            | absent     | M                 | wt                        | wt                                                                   | wt                       | 2620     | 15,2                 |
| 2889 | del13q            | absent     | M                 | wt                        | wt                                                                   | wt                       | 39914    | -5,6                 |
| 2890 | normal            | absent     | M                 | wt                        | wt                                                                   | wt                       | 6418     | 14,2                 |
| 2891 | del13q            | absent     | M                 | wt                        | wt                                                                   | wt                       | 21087    | 19,4                 |
| 2892 | del13q            | absent     | M                 | wt                        | wt                                                                   | wt                       | 7999     | 4                    |
| 2893 | normal            | absent     | UM                | p.G742D 41%               | wt                                                                   | wt                       | 8263     | 31                   |
| 2895 | del13q            | absent     | M                 | wt                        | wt                                                                   | wt                       | 8198     | 29,4                 |
| 2896 | normal            | absent     | UM                | wt                        | wt                                                                   | wt                       | 6138     | 26,6                 |
| 2898 | del13q            | absent     | M                 | wt                        | wt                                                                   | wt                       | 10856    | 5,2                  |
| 2899 | del13q            | absent     | M                 | wt                        | wt                                                                   | wt                       | 14242    | 9,6                  |
| 2900 | del17p            | absent     | UM                | wt                        | wt                                                                   | mut                      | 45539    | 9,8                  |
| 2901 | normal            | absent     | M                 | wt                        | wt                                                                   | wt                       | 7920     | 13,6                 |
| 2902 | del13q            | absent     | M                 | wt                        | wt                                                                   | wt                       | 36261    | -4,8                 |
| 2905 | tris12            | present    | UM                | wt                        | c.*7668+371A>G 45.9%                                                 | wt                       | 13843    | 11,8                 |
| 2906 | del11q            | absent     | M                 | wt                        | wt                                                                   | wt                       | 13146    | 32                   |
| 2907 | del17p            | absent     | M                 | wt                        | wt                                                                   | mut                      | 65039    | 3,8                  |
| 2908 | del13q            | absent     | UM                | wt                        | wt                                                                   | mut                      | 3737     | 26,4                 |
| 2909 | del11q            | absent     | UM                | wt                        | wt                                                                   | wt                       | 8731     | 13,8                 |
| 2912 | del17p            | absent     | UM                | wt                        | c.*7668+378A>G 33.3%                                                 | mut                      | 8438     | 13,2                 |
| 2913 | del13q            | absent     | UM                | wt                        | wt                                                                   | wt                       | 3372     | 37,4                 |
| 2914 | del13q            | absent     | M                 | wt                        | wt                                                                   | wt                       | 51540    | 9,8                  |
| 2915 | del13q            | absent     | M                 | wt                        | wt                                                                   | wt                       | 8365     | 14                   |
| 2917 | tris12            | present    | UM                | wt                        | wt                                                                   | wt                       | 7886     | 4,6                  |
| 2921 | del13q            | absent     | UM                | wt                        | c.*7668+371A>G 47.4%                                                 | wt                       | 7314     | 34,2                 |
| 2923 | del13q            | absent     | UM                | wt                        | wt                                                                   | wt                       | 6293     | 16,6                 |
| 2925 | normal            | absent     | M                 | wt                        | wt                                                                   | wt                       | 2619     | -14                  |
| 2926 | del17p            | absent     | M                 | wt                        | wt                                                                   | mut                      | 54015    | 2,2                  |
| 2928 | normal            | absent     | M                 | wt                        | wt                                                                   | wt                       | 178310   | 3,2                  |
| 2929 | del13q            | absent     | M                 | wt                        | wt                                                                   | wt                       | 66826    | 5,8                  |
| 2933 | del11q            | absent     | UM                | p.K700E 40%               | wt                                                                   | n.a.                     | 1219     | 71,2                 |
| 2934 | del13q            | absent     | M                 | wt                        | wt                                                                   | wt                       | 8025     | 23,2                 |
| 2935 | normal            | absent     | M                 | wt                        | wt                                                                   | wt                       | 9782     | 5,2                  |
| 2936 | normal            | absent     | M                 | wt                        | wt                                                                   | wt                       | 4880     | 27,6                 |
| 2937 | normal            | absent     | M                 | wt                        | wt                                                                   | wt                       | 4420     | 10                   |
| 2938 | tris12            | present    | n.a.              | wt                        | wt                                                                   | wt                       | 43153    | -4,8                 |
| 2941 | del13q            | absent     | UM                | wt                        | wt                                                                   | wt                       | 3115     | 23,4                 |
| 2942 | del11q            | absent     | UM                | wt                        | wt                                                                   | wt                       | 5019     | 25,2                 |
| 2943 | normal            | absent     | M                 | wt                        | wt                                                                   | wt                       | 79864    | 8,4                  |
| 2944 | del13q            | absent     | M                 | wt                        | wt                                                                   | wt                       | 5630     | 3                    |
| 2945 | del13q            | absent     | M                 | wt                        | wt                                                                   | wt                       | 5255     | 14                   |
| 2948 | normal            | absent     | UM                | wt                        | c.*7668+378A>G 9%                                                    | n.a.                     | 7366     | 10,6                 |
| 2950 | del17p            | absent     | UM                | wt                        | wt                                                                   | mut                      | 28641    | -2,2                 |
| 2956 | normal            | absent     | M                 | wt                        | wt                                                                   | wt                       | 1837     | 31                   |
| 2957 | tris12            | present    | M                 | wt                        | wt                                                                   | wt                       | 28679    | 12                   |
| 2959 | del11q            | absent     | UM                | wt                        | wt                                                                   | wt                       | 9912     | -6,2                 |
| 2960 | del13q            | absent     | M                 | wt                        | wt                                                                   | wt                       | 3939     | 27,2                 |
| 2964 | del13q            | absent     | UM                | p.G740E 44%               | wt                                                                   | wt                       | 9078     | 11                   |
| 2966 | tris12            | present    | UM                | wt                        | p.P2514Rfs*4 24%                                                     | wt                       | 12268    | 25                   |
| 2971 | del17p            | absent     | UM                | wt                        | wt                                                                   | mut                      | 36347    | 17,4                 |
| 2972 | del13q            | absent     | M                 | wt                        | wt                                                                   | wt                       | 6158     | 4                    |
| 2973 | del13q            | absent     | UM                | wt                        | wt                                                                   | wt                       | 6592     | 13,2                 |
| 2974 | normal            | absent     | M                 | wt                        | wt                                                                   | mut                      | 5148     | 16,4                 |
| 2975 | del17p            | absent     | UM                | p.K666N 53%               | wt                                                                   | mut                      | 10524    | 1                    |
| 2976 | normal            | absent     | M                 | wt                        | wt                                                                   | wt                       | 9756     | 4,2                  |
| 2977 | tris12            | present    | UM                | wt                        | wt                                                                   | wt                       | 6571     | 22,8                 |
| 2979 | normal            | absent     | M                 | wt                        | wt                                                                   | wt                       | 108669   | 15,6                 |
| 2982 | tris12            | present    | UM                | wt                        | wt                                                                   | wt                       | 7133     | 8,4                  |



| ID   | FISH <sup>A</sup> | Trisomy 12 | IGHV <sup>B</sup> | SF3B1 status <sup>C</sup> | NOTCH1 status <sup>C</sup>                                     | TP53 status <sup>C</sup> | CD20 MFI | CD20dim fraction (%) |
|------|-------------------|------------|-------------------|---------------------------|----------------------------------------------------------------|--------------------------|----------|----------------------|
| 2983 | del13q            | absent     | M                 | p.G742D 34%               | wt                                                             | mut                      | 1144     | 62,8                 |
| 2984 | del13q            | absent     | UM                | wt                        | wt                                                             | mut                      | 5124     | 23,6                 |
| 2985 | tris12            | present    | UM                | wt                        | p.P2514Rfs*4 18.9%                                             | wt                       | 10735    | 18,2                 |
| 2986 | tris12            | present    | UM                | wt                        | p.P2514Rfs*4 48%                                               | mut                      | 19725    | 15,8                 |
| 2987 | del13q            | absent     | UM                | wt                        | wt                                                             | wt                       | 4787     | 34                   |
| 2989 | del17p            | absent     | M                 | wt                        | wt                                                             | wt                       | 42545    | 1                    |
| 2994 | tris12            | present    | M                 | wt                        | wt                                                             | wt                       | 39813    | -3,4                 |
| 2995 | normal            | absent     | UM                | wt                        | wt                                                             | wt                       | 5853     | 19,2                 |
| 2996 | tris12            | present    | M                 | p.I704T 10.4%             | wt                                                             | wt                       | 34410    | 12,6                 |
| 2997 | tris12            | present    | M                 | wt                        | wt                                                             | wt                       | 98101    | -4                   |
| 3001 | tris12            | present    | UM                | wt                        | p.Q2444* 36%                                                   | wt                       | 11025    | 11,6                 |
| 3002 | normal            | absent     | M                 | wt                        | wt                                                             | wt                       | 2396     | 10,2                 |
| 3003 | del13q            | absent     | M                 | wt                        | wt                                                             | wt                       | 9991     | 21,8                 |
| 3004 | del13q            | absent     | M                 | wt                        | wt                                                             | wt                       | 12499    | 53,2                 |
| 3007 | tris12            | present    | M                 | wt                        | wt                                                             | wt                       | 32394    | 13                   |
| 3009 | del13q            | absent     | UM                | wt                        | wt                                                             | wt                       | 7423     | 16,8                 |
| 3011 | tris12            | present    | UM                | wt                        | wt                                                             | mut                      | 16756    | 7,8                  |
| 3012 | tris12            | present    | M                 | wt                        | wt                                                             | wt                       | 29959    | 2,6                  |
| 3013 | del17p            | absent     | M                 | wt                        | wt                                                             | mut                      | 34423    | 4,4                  |
| 3015 | del17p            | absent     | UM                | wt                        | wt                                                             | mut                      | 16545    | 12,4                 |
| 3016 | normal            | absent     | UM                | wt                        | wt                                                             | wt                       | 6649     | -2,4                 |
| 3019 | tris12            | present    | M                 | wt                        | p.Q2501* 22%;<br>p.P2514Rfs*4 0.9%                             | wt                       | 23162    | 15,6                 |
| 3020 | normal            | absent     | UM                | wt                        | wt                                                             | wt                       | 63697    | 5,6                  |
| 3021 | del11q            | absent     | UM                | wt                        | wt                                                             | wt                       | 9164     | 26,4                 |
| 3026 | tris12            | present    | M                 | wt                        | wt                                                             | wt                       | 27775    | 15                   |
| 3027 | tris12            | present    | M                 | wt                        | wt                                                             | wt                       | 93672    | 3                    |
| 3028 | normal            | absent     | UM                | wt                        | wt                                                             | wt                       | 183025   | 2,6                  |
| 3029 | del13q            | absent     | M                 | wt                        | wt                                                             | wt                       | 51176    | -4,2                 |
| 3030 | normal            | absent     | UM                | wt                        | wt                                                             | wt                       | 8274     | 15                   |
| 3033 | del17p            | absent     | UM                | wt                        | wt                                                             | mut                      | 10145    | 1,4                  |
| 3034 | del13q            | absent     | M                 | wt                        | wt                                                             | wt                       | 12252    | 9,4                  |
| 3035 | tris12            | present    | UM                | wt                        | wt                                                             | wt                       | 9427     | -7,8                 |
| 3038 | normal            | absent     | M                 | wt                        | wt                                                             | wt                       | 3706     | 23                   |
| 3040 | del11q            | present    | UM                | wt                        | wt                                                             | wt                       | 4063     | 29,8                 |
| 3043 | del17p            | absent     | UM                | wt                        | wt                                                             | wt                       | 22232    | 23,4                 |
| 3044 | del17p            | absent     | UM                | wt                        | wt                                                             | mut                      | 2048     | 54,6                 |
| 3045 | del13q            | absent     | UM                | wt                        | wt                                                             | wt                       | 6248     | 19,6                 |
| 3049 | tris12            | present    | M                 | wt                        | wt                                                             | wt                       | 52716    | 2                    |
| 3050 | del11q            | absent     | UM                | p.G742D 46%               | wt                                                             | wt                       | 10855    | 46,2                 |
| 3051 | del13q            | absent     | UM                | wt                        | wt                                                             | wt                       | 5158     | 17,8                 |
| 3053 | del13q            | absent     | UM                | wt                        | p.P2514Rfs*4 13%                                               | mut                      | 17841    | 12,6                 |
| 3055 | del13q            | absent     | UM                | wt                        | p.P2514Rfs*4 5%;<br>p.Q2404* 2%                                | wt                       | 4128     | 18,2                 |
| 3059 | del17p            | absent     | M                 | wt                        | wt                                                             | mut                      | 11960    | 17,2                 |
| 3060 | del17p            | absent     | UM                | p.G742D 45%               | wt                                                             | mut                      | 1971     | 39,8                 |
| 3061 | normal            | absent     | UM                | wt                        | p.P2514Rfs*4 37%                                               | wt                       | 7197     | 15,8                 |
| 3062 | normal            | absent     | UM                | wt                        | wt                                                             | wt                       | 44954    | -23,2                |
| 3065 | del11q            | absent     | UM                | wt                        | p.Q2409* 58%                                                   | wt                       | 6104     | 22                   |
| 3066 | tris12            | present    | M                 | p.E768K 34%               | wt                                                             | wt                       | 26463    | 16,4                 |
| 3072 | del13q            | absent     | UM                | wt                        | wt                                                             | wt                       | 10648    | 17                   |
| 3081 | normal            | absent     | M                 | wt                        | wt                                                             | wt                       | 8792     | 26,6                 |
| 3082 | normal            | absent     | M                 | wt                        | wt                                                             | wt                       | 8372     | 12                   |
| 3083 | normal            | absent     | UM                | wt                        | wt                                                             | wt                       | 64332    | 22,2                 |
| 3086 | del17p            | absent     | M                 | wt                        | wt                                                             | mut                      | 36362    | -6,2                 |
| 3088 | del17p            | absent     | UM                | wt                        | wt                                                             | mut                      | 13341    | 21,8                 |
| 3090 | normal            | absent     | UM                | wt                        | c.*7668+371A>G 38.7%;<br>p.P2514Rfs*4 3.5%                     | wt                       | 12396    | 19,6                 |
| 3092 | tris12            | present    | UM                | wt                        | p.Q2440* 48%                                                   | wt                       | 7297     | 39,6                 |
| 3094 | del13q            | absent     | M                 | wt                        | wt                                                             | wt                       | 9368     | 21,8                 |
| 3096 | del13q            | absent     | UM                | wt                        | wt                                                             | wt                       | 3994     | 41,8                 |
| 3097 | del13q            | absent     | UM                | wt                        | wt                                                             | wt                       | 9536     | 16,6                 |
| 3099 | del17p            | absent     | M                 | wt                        | wt                                                             | mut                      | 113557   | 1,4                  |
| 3100 | del11q            | absent     | M                 | wt                        | p.P2514Rfs*4 43%                                               | wt                       | 6303     | 29                   |
| 3101 | del13q            | absent     | M                 | wt                        | p.P2514Rfs*4 6%                                                | wt                       | 11223    | 26,8                 |
| 3102 | del11q            | absent     | M                 | p.K700E 42%               | wt                                                             | wt                       | 27553    | 25,2                 |
| 3103 | tris12            | present    | M                 | wt                        | wt                                                             | wt                       | 91161    | 5,2                  |
| 3104 | del13q            | absent     | M                 | wt                        | wt                                                             | n.a.                     | 6736     | 15,6                 |
| 3106 | del13q            | absent     | M                 | wt                        | wt                                                             | wt                       | 53586    | 20                   |
| 3107 | del11q            | absent     | UM                | wt                        | wt                                                             | wt                       | 4264     | 25,4                 |
| 3108 | del11q            | absent     | UM                | wt                        | wt                                                             | wt                       | 21291    | 23,4                 |
| 3109 | tris12            | present    | M                 | wt                        | wt                                                             | wt                       | 153103   | 0,6                  |
| 3110 | tris12            | present    | UM                | wt                        | p.P2514Rfs*4 51%                                               | mut                      | 2646     | 36                   |
| 3114 | normal            | absent     | UM                | p.K700E 41%               | p.P2514Rfs*4 3%                                                | n.a.                     | 9840     | 35,8                 |
| 3118 | normal            | absent     | UM                | wt                        | p.P2514Rfs*4 84%                                               | wt                       | 11504    | 15,6                 |
| 3119 | normal            | absent     | M                 | wt                        | wt                                                             | wt                       | 45932    | 20,6                 |
| 3120 | del11q            | absent     | UM                | wt                        | wt                                                             | mut                      | 6582     | 14,4                 |
| 3124 | normal            | absent     | M                 | wt                        | wt                                                             | wt                       | 13672    | 26,8                 |
| 3125 | normal            | absent     | UM                | wt                        | p.V2278Gfs*75 21%;<br>c.*7668+371A>G 4%;<br>p.P2514Rfs*4 0.47% | wt                       | 4292     | 20,2                 |
| 3126 | del13q            | absent     | M                 | wt                        | wt                                                             | wt                       | 6732     | 9                    |
| 3127 | normal            | absent     | UM                | p.I704T 11%               | wt                                                             | wt                       | 4839     | 1,6                  |
| 3132 | tris12            | present    | M                 | wt                        | p.P2514Rfs*4 33%                                               | wt                       | 15891    | 8                    |
| 3133 | normal            | absent     | M                 | wt                        | wt                                                             | wt                       | 5346     | 29,8                 |
| 3134 | del13q            | absent     | M                 | wt                        | wt                                                             | wt                       | 8547     | 18,6                 |
| 3136 | normal            | absent     | M                 | wt                        | wt                                                             | wt                       | 9995     | -10,4                |

| ID   | FISH <sup>A</sup> | Trisomy 12 | IGHV <sup>B</sup> | SF3B1 status <sup>C</sup> | NOTCH1 status <sup>C</sup>               | TP53 status <sup>C</sup> | CD20 MFI | CD20dim fraction (%) |
|------|-------------------|------------|-------------------|---------------------------|------------------------------------------|--------------------------|----------|----------------------|
| 3137 | del17p            | absent     | M                 | wt                        | wt                                       | mut                      | 80419    | -12,6                |
| 3138 | del13q            | absent     | M                 | wt                        | wt                                       | wt                       | 9981     | 17,2                 |
| 3140 | del11q            | absent     | UM                | wt                        | wt                                       | wt                       | 5821     | 30,6                 |
| 3142 | tris12            | present    | UM                | wt                        | wt                                       | mut                      | 13529    | 21                   |
| 3143 | tris12            | present    | n.a.              | wt                        | p.S2274Pfs*79 12%;<br>p.P2514Rfs*4 29.5% | wt                       | 10378    | 26,2                 |
| 3144 | tris12            | present    | UM                | wt                        | wt                                       | wt                       | 19867    | 6,6                  |
| 3146 | del13q            | absent     | M                 | wt                        | wt                                       | wt                       | 6895     | 31                   |
| 3147 | del17p            | present    | M                 | wt                        | wt                                       | wt                       | 8746     | 15,2                 |
| 3148 | normal            | absent     | M                 | wt                        | wt                                       | wt                       | 138107   | 6,2                  |
| 3155 | del17p            | absent     | M                 | wt                        | wt                                       | mut                      | 2566     | 29,4                 |
| 3156 | tris12            | present    | UM                | wt                        | p.L2482* 25.2%;<br>p.P2514Rfs*4 1.8%     | wt                       | 15753    | 18                   |
| 3157 | normal            | absent     | M                 | wt                        | wt                                       | wt                       | 4310     | 14,8                 |
| 3159 | del13q            | absent     | M                 | wt                        | wt                                       | wt                       | 7378     | -2,2                 |
| 3160 | del13q            | absent     | M                 | wt                        | wt                                       | wt                       | 7149     | 15,4                 |
| 3161 | del13q            | absent     | M                 | wt                        | wt                                       | wt                       | 6175     | 18,2                 |
| 3164 | tris12            | present    | UM                | wt                        | p.P2465Afs*13 51%                        | wt                       | 33004    | 19                   |
| 3165 | del11q            | absent     | M                 | wt                        | wt                                       | wt                       | 35776    | 5                    |
| 3166 | normal            | absent     | M                 | wt                        | wt                                       | wt                       | 5270     | 10                   |
| 3167 | normal            | absent     | M                 | p.K700E 9%                | wt                                       | wt                       | 11548    | 15,6                 |
| 3168 | tris12            | present    | M                 | wt                        | wt                                       | wt                       | 47828    | 16,8                 |
| 3169 | normal            | absent     | M                 | wt                        | wt                                       | wt                       | 6777     | 35,8                 |
| 3170 | del11q            | absent     | UM                | wt                        | wt                                       | wt                       | 6009     | 35,6                 |
| 3171 | del13q            | absent     | M                 | wt                        | wt                                       | wt                       | 7574     | 22,6                 |
| 3172 | del13q            | absent     | M                 | p.Y623C 50%               | wt                                       | mut                      | 5880     | 43,4                 |
| 3175 | tris12            | present    | M                 | wt                        | wt                                       | wt                       | 47103    | 2                    |
| 3176 | del13q            | absent     | M                 | wt                        | wt                                       | wt                       | 10014    | 13,8                 |
| 3177 | del11q            | absent     | UM                | wt                        | p.P2514Rfs*4 46%                         | wt                       | 13341    | 29,4                 |
| 3178 | del13q            | absent     | M                 | wt                        | wt                                       | wt                       | 36822    | -3,4                 |
| 3179 | del13q            | absent     | M                 | wt                        | wt                                       | wt                       | 43479    | -6,8                 |
| 3180 | normal            | absent     | M                 | wt                        | wt                                       | wt                       | 75008    | -7                   |
| 3182 | del13q            | absent     | M                 | wt                        | wt                                       | wt                       | 15251    | 14,4                 |
| 3184 | del17p            | absent     | UM                | wt                        | wt                                       | mut                      | 58079    | -1,2                 |
| 3185 | tris12            | present    | UM                | wt                        | wt                                       | mut                      | 4327     | 19,2                 |
| 3186 | del11q            | absent     | UM                | wt                        | wt                                       | wt                       | 57210    | 12,6                 |
| 3189 | normal            | absent     | M                 | wt                        | wt                                       | wt                       | 94075    | 20,2                 |
| 3190 | del13q            | absent     | M                 | wt                        | wt                                       | wt                       | 21073    | 30                   |
| 3191 | del13q            | absent     | M                 | wt                        | wt                                       | wt                       | 16663    | 15,4                 |
| 3192 | del11q            | absent     | UM                | wt                        | c.*7668+378A>G 51%                       | wt                       | 12949    | 16                   |
| 3193 | normal            | absent     | M                 | wt                        | p.P2514Rfs*4 5.1%                        | wt                       | 13449    | 7,2                  |
| 3195 | del11q            | absent     | M                 | wt                        | wt                                       | wt                       | 7662     | 12                   |
| 3196 | del11q            | absent     | M                 | wt                        | wt                                       | wt                       | 7293     | -7,6                 |
| 3202 | del11q            | absent     | UM                | wt                        | wt                                       | wt                       | 12511    | 17,8                 |
| 3203 | normal            | absent     | M                 | wt                        | wt                                       | wt                       | 4761     | 22,4                 |
| 3205 | del13q            | absent     | n.a.              | wt                        | wt                                       | wt                       | 17715    | 9,6                  |
| 3206 | tris12            | present    | UM                | wt                        | wt                                       | wt                       | 17978    | 21                   |
| 3211 | del13q            | absent     | UM                | wt                        | wt                                       | wt                       | 19140    | 14,4                 |
| 3212 | del17p            | absent     | M                 | wt                        | wt                                       | mut                      | 8652     | 18,4                 |
| 3213 | tris12            | present    | UM                | wt                        | p.P2514Rfs*4 37.7%                       | wt                       | 16932    | 6                    |
| 3214 | del11q            | absent     | UM                | p.K700E 5%                | wt                                       | wt                       | 1406     | 14,4                 |
| 3215 | del13q            | absent     | UM                | p.delQ699 41%             | p.P2514Rfs*4 53%                         | wt                       | 14358    | 33                   |
| 3220 | del17p            | absent     | M                 | wt                        | wt                                       | mut                      | 15215    | 29,4                 |
| 3221 | del13q            | absent     | M                 | wt                        | wt                                       | wt                       | 36365    | 15,6                 |
| 3222 | del17p            | absent     | M                 | wt                        | wt                                       | mut                      | 9271     | 11,2                 |
| 3223 | del13q            | absent     | UM                | wt                        | wt                                       | wt                       | 7435     | 25,2                 |
| 3225 | del17p            | absent     | M                 | wt                        | wt                                       | wt                       | 23590    | 12,8                 |
| 3226 | del13q            | absent     | M                 | wt                        | wt                                       | mut                      | 9915     | 11,2                 |
| 3228 | normal            | absent     | M                 | wt                        | wt                                       | wt                       | 10044    | 15,8                 |
| 3230 | normal            | absent     | M                 | wt                        | wt                                       | wt                       | 7867     | 12,8                 |
| 3234 | tris12            | present    | M                 | wt                        | wt                                       | wt                       | 41445    | 3,56                 |
| 3236 | del11q            | present    | UM                | wt                        | p.P2514Rfs*4 42%                         | wt                       | 21319    | 4,4                  |
| 3237 | del17p            | absent     | UM                | p.I704T 46%               | wt                                       | mut                      | 6933     | 58,8                 |
| 3239 | del11q            | absent     | M                 | wt                        | wt                                       | wt                       | 7684     | 29,6                 |
| 3240 | del13q            | absent     | M                 | wt                        | wt                                       | wt                       | 5289     | 8,8                  |
| 3241 | del11q            | absent     | UM                | wt                        | wt                                       | wt                       | 5028     | 34,8                 |
| 3244 | del13q            | absent     | M                 | wt                        | wt                                       | wt                       | 6043     | 7,6                  |
| 3245 | normal            | absent     | UM                | wt                        | p.S2432Rfs*4 45%                         | wt                       | 6774     | 9,8                  |
| 3246 | tris12            | present    | n.a.              | wt                        | wt                                       | wt                       | 25438    | 21,4                 |
| 3249 | normal            | absent     | UM                | wt                        | wt                                       | mut                      | 3945     | 29                   |
| 3250 | del17p            | absent     | M                 | wt                        | wt                                       | mut                      | 51333    | 12                   |
| 3251 | del13q            | absent     | M                 | wt                        | wt                                       | wt                       | 9270     | 17,6                 |
| 3252 | del13q            | absent     | UM                | p.I704F 18%               | wt                                       | wt                       | 22427    | 41,2                 |
| 3253 | normal            | absent     | UM                | wt                        | wt                                       | wt                       | 19442    | 6,6                  |
| 3254 | del13q            | absent     | M                 | wt                        | wt                                       | wt                       | 8323     | 10,8                 |
| 3255 | normal            | absent     | M                 | wt                        | wt                                       | wt                       | 10560    | 20,4                 |
| 3257 | del17p            | absent     | M                 | wt                        | wt                                       | mut                      | 12849    | 14,4                 |
| 3258 | del13q            | absent     | M                 | wt                        | wt                                       | wt                       | 17172    | 10,2                 |
| 3259 | del17p            | absent     | M                 | wt                        | wt                                       | mut                      | 66120    | 1,4                  |
| 3260 | del13q            | absent     | M                 | wt                        | wt                                       | wt                       | 7795     | 23,2                 |
| 3261 | del13q            | absent     | UM                | wt                        | wt                                       | wt                       | 8030     | 13,4                 |
| 3264 | del13q            | absent     | M                 | wt                        | wt                                       | wt                       | 14941    | 12,6                 |
| 3266 | tris12            | present    | UM                | wt                        | wt                                       | wt                       | 31291    | 32,8                 |
| 3267 | del11q            | absent     | UM                | p.G742D 29%               | wt                                       | wt                       | 9567     | 14,4                 |
| 3268 | del17p            | absent     | UM                | wt                        | wt                                       | mut                      | 6273     | 27,4                 |
| 3269 | tris12            | present    | M                 | wt                        | wt                                       | wt                       | 47057    | 2,8                  |

| ID   | FISH <sup>A</sup> | Trisomy 12 | IGHV <sup>B</sup> | SF3B1 status <sup>C</sup>                  | NOTCH1 status <sup>C</sup>                       | TP53 status <sup>C</sup> | CD20 MFI | CD20dim fraction (%) |
|------|-------------------|------------|-------------------|--------------------------------------------|--------------------------------------------------|--------------------------|----------|----------------------|
| 3270 | del13q            | absent     | UM                | wt                                         | wt                                               | wt                       | 9461     | 12,8                 |
| 3271 | tris12            | present    | UM                | wt                                         | p.P2514Rfs*4 45%                                 | wt                       | 12255    | 13,2                 |
| 3276 | del11q            | absent     | UM                | p.K700E 18%                                | wt                                               | mut                      | 2346     | 36,8                 |
| 3278 | normal            | absent     | UM                | wt                                         | p.P2514Rfs*4 22%;<br>p.Q2519* 7%                 | wt                       | 11428    | 23,4                 |
| 3280 | del11q            | absent     | UM                | wt                                         | p.P2514Rfs*4 23%                                 | wt                       | 2316     | 33,6                 |
| 3281 | normal            | absent     | M                 | wt                                         | wt                                               | wt                       | 191301   | 5,4                  |
| 3282 | normal            | absent     | n.a.              | wt                                         | p.P2514Rfs*4 50%                                 | wt                       | 1653     | 28,2                 |
| 3284 | normal            | absent     | M                 | wt                                         | wt                                               | wt                       | 7499     | 7,4                  |
| 3286 | del13q            | absent     | UM                | wt                                         | wt                                               | wt                       | 13877    | 11,4                 |
| 3287 | tris12            | present    | n.a.              | wt                                         | p.P2514Rfs*4 23%;<br>p.Q2487* 9%;<br>p.Q2459* 8% | wt                       | 9695     | 31,6                 |
| 3289 | normal            | absent     | n.a.              | wt                                         | wt                                               | wt                       | 12598    | 18,8                 |
| 3290 | normal            | absent     | M                 | wt                                         | wt                                               | wt                       | 16477    | 9,2                  |
| 3293 | del11q            | present    | UM                | wt                                         | p.S2492* 23%                                     | wt                       | 9571     | 35,4                 |
| 3294 | normal            | absent     | UM                | wt                                         | p.P2514Rfs*4 4%;<br>p.S2471Rfs*6 9%              | wt                       | 15503    | 10,4                 |
| 3296 | del17p            | absent     | UM                | wt                                         | wt                                               | mut                      | 4875     | 51,2                 |
| 3297 | normal            | absent     | UM                | wt                                         | p.P2514Rfs*4 7.9%                                | wt                       | 4362     | 29                   |
| 3299 | del17p            | absent     | M                 | wt                                         | wt                                               | mut                      | 58621    | 3                    |
| 3300 | del13q            | absent     | UM                | wt                                         | wt                                               | mut                      | 4432     | 35,4                 |
| 3301 | normal            | absent     | UM                | p.R625C 10%;<br>p.G740E 6%;<br>p.G742D 13% | wt                                               | mut                      | 3525     | 36,8                 |
| 3302 | tris12            | present    | UM                | wt                                         | wt                                               | wt                       | 6833     | 15,8                 |
| 3303 | tris12            | present    | UM                | wt                                         | wt                                               | wt                       | 31358    | 29                   |
| 3304 | normal            | absent     | M                 | wt                                         | wt                                               | wt                       | 11012    | 10,4                 |
| 3308 | del13q            | absent     | M                 | wt                                         | wt                                               | wt                       | 10761    | 9,6                  |
| 3309 | normal            | absent     | n.a.              | wt                                         | wt                                               | wt                       | 165113   | -7,8                 |
| 3320 | normal            | absent     | M                 | wt                                         | wt                                               | wt                       | 10621    | 11,2                 |
| 3322 | normal            | absent     | M                 | p.K700E 46%                                | wt                                               | wt                       | 4787     | 13,2                 |
| 3324 | tris12            | present    | M                 | wt                                         | wt                                               | wt                       | 12353    | 19,6                 |
| 3325 | del13q            | absent     | M                 | wt                                         | wt                                               | wt                       | 23375    | 12,6                 |
| 3329 | normal            | absent     | M                 | wt                                         | wt                                               | wt                       | 5319     | 12,8                 |
| 3330 | del17p            | present    | UM                | wt                                         | wt                                               | mut                      | 4063     | 29,6                 |
| 3333 | normal            | absent     | UM                | wt                                         | wt                                               | wt                       | 16171    | 11,4                 |
| 3336 | normal            | absent     | n.a.              | wt                                         | wt                                               | mut                      | 19655    | 37                   |
| 3337 | del13q            | absent     | M                 | wt                                         | wt                                               | wt                       | 3212     | 15,2                 |
| 3338 | tris12            | present    | UM                | wt                                         | wt                                               | wt                       | 11085    | -5,6                 |
| 3339 | del13q            | absent     | UM                | p.E622D 39.2%                              | wt                                               | wt                       | 11165    | 12                   |
| 3340 | del13q            | absent     | M                 | wt                                         | wt                                               | wt                       | 10099    | 9,6                  |
| 3349 | del13q            | absent     | M                 | wt                                         | wt                                               | wt                       | 11305    | 10,4                 |
| 3352 | normal            | absent     | M                 | wt                                         | wt                                               | wt                       | 137364   | 11,4                 |
| 3353 | del11q            | absent     | M                 | wt                                         | wt                                               | wt                       | 9147     | 23,8                 |
| 3355 | tris12            | present    | M                 | wt                                         | wt                                               | wt                       | 32676    | -5                   |
| 3356 | normal            | absent     | UM                | wt                                         | wt                                               | wt                       | 5052     | 37                   |
| 3357 | del13q            | absent     | UM                | wt                                         | p.Q2501* 48%                                     | wt                       | 13661    | 1,8                  |
| 3362 | normal            | absent     | M                 | wt                                         | wt                                               | wt                       | 10791    | 14,4                 |
| 3363 | normal            | absent     | UM                | wt                                         | wt                                               | wt                       | 47956    | 40,4                 |
| 3365 | tris12            | present    | n.a.              | wt                                         | wt                                               | wt                       | 80283    | -3,6                 |
| 3366 | tris12            | present    | UM                | wt                                         | p.P2514Rfs*4 65%                                 | wt                       | 14135    | 8,4                  |
| 3368 | normal            | absent     | M                 | wt                                         | wt                                               | wt                       | 41776    | 2,6                  |
| 3369 | normal            | absent     | UM                | wt                                         | wt                                               | wt                       | 54740    | 4,6                  |
| 3371 | del13q            | absent     | M                 | wt                                         | wt                                               | wt                       | 8323     | 14                   |
| 3372 | normal            | absent     | UM                | wt                                         | p.P2514Rfs*4 12%                                 | wt                       | 9901     | 18,2                 |
| 3373 | tris12            | present    | UM                | wt                                         | p.P2514Rfs*4 16.6%                               | wt                       | 8773     | 13,6                 |
| 3374 | normal            | absent     | n.a.              | wt                                         | wt                                               | mut                      | 1445     | -7,4                 |
| 3375 | tris12            | present    | n.a.              | wt                                         | wt                                               | wt                       | 19646    | 9,8                  |
| 3380 | tris12            | present    | M                 | wt                                         | p.P2514Rfs*4 19%;<br>p.L2482* 4%                 | wt                       | 47388    | 4                    |
| 3381 | del17p            | absent     | UM                | wt                                         | p.P2514Rfs*4 47.3%                               | mut                      | 15085    | 27,2                 |
| 3383 | tris12            | present    | M                 | wt                                         | wt                                               | wt                       | 127962   | -1,4                 |
| 3384 | del13q            | absent     | M                 | wt                                         | wt                                               | wt                       | 11186    | 44                   |
| 3385 | normal            | absent     | M                 | wt                                         | wt                                               | wt                       | 42965    | 6                    |
| 3386 | del11q            | absent     | UM                | wt                                         | wt                                               | wt                       | 2470     | 50,4                 |
| 3387 | del13q            | absent     | UM                | wt                                         | wt                                               | wt                       | 7244     | 36                   |
| 3388 | normal            | absent     | UM                | p.I704F 28%                                | wt                                               | wt                       | 4870     | 31,8                 |
| 3390 | del11q            | absent     | UM                | wt                                         | wt                                               | wt                       | 9958     | 20,4                 |
| 3391 | normal            | absent     | M                 | p.K700E 36%                                | wt                                               | wt                       | 6657     | 10,8                 |
| 3393 | del13q            | absent     | UM                | p.G740E 46%                                | wt                                               | mut                      | 1753     | 35,2                 |
| 3396 | del11q            | absent     | UM                | wt                                         | wt                                               | wt                       | 9149     | 18,8                 |
| 3398 | normal            | absent     | UM                | wt                                         | p.Q2391* 42%                                     | wt                       | 10514    | 30,8                 |
| 3399 | del17p            | absent     | M                 | wt                                         | wt                                               | mut                      | 53018    | 10,2                 |
| 3400 | del11q            | absent     | UM                | wt                                         | c.*7668+378A>G 12%                               | wt                       | 9927     | 23,4                 |
| 3401 | del13q            | absent     | DISC              | wt                                         | wt                                               | wt                       | 12064    | 11,8                 |
| 3402 | del13q            | absent     | UM                | wt                                         | p.L2482* 33%                                     | wt                       | 10563    | 33,4                 |
| 3405 | tris12            | present    | UM                | wt                                         | c.*7668+378A>G 36%                               | wt                       | 5686     | 28,6                 |
| 3406 | del17p            | absent     | UM                | wt                                         | p.P2514Rfs*4 48%                                 | mut                      | 15128    | 8,8                  |
| 3407 | del13q            | absent     | UM                | wt                                         | wt                                               | wt                       | 8577     | 24,6                 |
| 3409 | del17p            | absent     | M                 | wt                                         | wt                                               | mut                      | 7065     | 19,2                 |
| 3410 | del11q            | absent     | UM                | wt                                         | wt                                               | wt                       | 12609    | 39,4                 |
| 3411 | normal            | absent     | M                 | wt                                         | wt                                               | wt                       | 9422     | 8,2                  |
| 3413 | tris12            | present    | M                 | wt                                         | p.Q2403fs*19 25%                                 | wt                       | 58794    | 8,4                  |
| 3414 | tris12            | present    | M                 | wt                                         | wt                                               | wt                       | 92236    | -2,2                 |
| 3415 | normal            | absent     | M                 | wt                                         | wt                                               | wt                       | 10087    | 36,2                 |
| 3417 | tris12            | present    | UM                | wt                                         | wt                                               | wt                       | 12961    | 11,6                 |

| ID   | FISH <sup>A</sup> | Trisomy 12 | IGHV <sup>B</sup> | SF3B1 status <sup>C</sup> | NOTCH1 status <sup>C</sup>         | TP53 status <sup>C</sup> | CD20 MFI | CD20dim fraction (%) |
|------|-------------------|------------|-------------------|---------------------------|------------------------------------|--------------------------|----------|----------------------|
| 3423 | del13q            | absent     | M                 | wt                        | wt                                 | wt                       | 4209     | 43,6                 |
| 3424 | normal            | absent     | n.a.              | wt                        | wt                                 | wt                       | 6928     | 15                   |
| 3425 | normal            | absent     | UM                | wt                        | wt                                 | mut                      | 13039    | 21,4                 |
| 3426 | tris12            | present    | UM                | wt                        | wt                                 | wt                       | 30250    | 10,8                 |
| 3428 | n.a.              | absent     | M                 | wt                        | p.Q2503* 8%                        | wt                       | 9264     | 13,2                 |
| 3430 | normal            | absent     | UM                | wt                        | wt                                 | mut                      | 4550     | 21,8                 |
| 3431 | del13q            | absent     | M                 | wt                        | wt                                 | wt                       | 15428    | 2,6                  |
| 3432 | del13q            | absent     | n.a.              | wt                        | wt                                 | wt                       | 11261    | 15                   |
| 3433 | tris12            | present    | M                 | wt                        | wt                                 | wt                       | 13376    | 16,2                 |
| 3435 | normal            | absent     | UM                | p.K741E 34%               | wt                                 | wt                       | 15079    | 20                   |
| 3436 | del17p            | absent     | UM                | wt                        | wt                                 | mut                      | 6640     | 43,8                 |
| 3437 | tris12            | present    | n.a.              | p.Y765del 26%             | wt                                 | wt                       | 53227    | 10,4                 |
| 3438 | del13q            | absent     | M                 | wt                        | wt                                 | wt                       | 22640    | 8,8                  |
| 3439 | del13q            | absent     | M                 | wt                        | wt                                 | wt                       | 8779     | 25                   |
| 3440 | tris12            | present    | M                 | wt                        | wt                                 | wt                       | 44450    | 4,4                  |
| 3442 | normal            | absent     | M                 | wt                        | wt                                 | wt                       | 11329    | 9,4                  |
| 3443 | del13q            | absent     | M                 | wt                        | wt                                 | wt                       | 10431    | 16,6                 |
| 3444 | normal            | absent     | UM                | wt                        | wt                                 | wt                       | 4214     | 19,2                 |
| 3447 | normal            | absent     | UM                | wt                        | p.P2514Rfs*4 42%                   | wt                       | 3486     | 32,2                 |
| 3449 | tris12            | present    | M                 | wt                        | wt                                 | wt                       | 55293    | 5,4                  |
| 3450 | normal            | absent     | M                 | wt                        | wt                                 | wt                       | 8641     | 9,6                  |
| 3452 | del13q            | absent     | M                 | wt                        | wt                                 | wt                       | 15241    | 14,8                 |
| 3453 | del13q            | absent     | UM                | wt                        | wt                                 | wt                       | 6561     | 11                   |
| 3454 | tris12            | present    | M                 | wt                        | wt                                 | wt                       | 5627     | 27                   |
| 3455 | normal            | absent     | M                 | wt                        | wt                                 | wt                       | 9988     | 23,2                 |
| 3458 | del13q            | absent     | UM                | wt                        | wt                                 | wt                       | 10130    | 57,6                 |
| 3460 | normal            | absent     | M                 | wt                        | wt                                 | wt                       | 5603     | 18,8                 |
| 3461 | del13q            | absent     | UM                | wt                        | wt                                 | wt                       | 15498    | 41,6                 |
| 3462 | tris12            | present    | UM                | wt                        | wt                                 | wt                       | 3419     | 36                   |
| 3465 | del13q            | absent     | M                 | wt                        | wt                                 | wt                       | 9538     | 12                   |
| 3467 | del13q            | absent     | M                 | wt                        | wt                                 | wt                       | 11223    | 24                   |
| 3468 | del17p            | absent     | M                 | wt                        | wt                                 | mut                      | 11846    | 19,8                 |
| 3469 | normal            | absent     | M                 | wt                        | wt                                 | wt                       | 16280    | 10,6                 |
| 3473 | del13q            | absent     | UM                | wt                        | wt                                 | wt                       | 16283    | 13,2                 |
| 3475 | tris12            | present    | n.a.              | wt                        | wt                                 | wt                       | 17849    | -7,2                 |
| 3477 | normal            | absent     | UM                | p.E622D 32%               | wt                                 | wt                       | 9251     | 9,2                  |
| 3478 | normal            | absent     | M                 | wt                        | wt                                 | wt                       | 71946    | 16,4                 |
| 3479 | normal            | absent     | UM                | wt                        | wt                                 | mut                      | 7471     | 26,4                 |
| 3480 | del11q            | absent     | UM                | wt                        | wt                                 | wt                       | 9144     | 20,4                 |
| 3489 | del13q            | absent     | M                 | wt                        | wt                                 | wt                       | 12546    | 15,8                 |
| 3490 | del13q            | absent     | M                 | wt                        | wt                                 | wt                       | 7249     | 17,6                 |
| 3491 | tris12            | present    | M                 | wt                        | wt                                 | wt                       | 47591    | 1                    |
| 3492 | normal            | absent     | M                 | wt                        | wt                                 | wt                       | 7389     | 12                   |
| 3494 | tris12            | present    | UM                | wt                        | p.P2514Rfs*4 49.5%;<br>p.R2104H 2% | wt                       | 12031    | -2,4                 |
| 3499 | normal            | absent     | M                 | wt                        | wt                                 | wt                       | 37639    | 6,6                  |
| 3501 | del13q            | absent     | M                 | wt                        | wt                                 | mut                      | 16624    | 5,4                  |
| 3503 | del13q            | absent     | M                 | wt                        | wt                                 | wt                       | 10190    | 26,8                 |
| 3505 | del13q            | absent     | M                 | wt                        | wt                                 | wt                       | 9844     | 11                   |
| 3510 | del13q            | absent     | M                 | wt                        | wt                                 | wt                       | 6177     | 26,2                 |
| 3512 | del13q            | absent     | M                 | wt                        | wt                                 | wt                       | 6753     | 27,4                 |
| 3513 | del13q            | absent     | M                 | wt                        | wt                                 | wt                       | 13778    | 14,6                 |
| 3514 | del17p            | absent     | UM                | p.K666N 33%               | wt                                 | mut                      | 16616    | 21,8                 |
| 3515 | tris12            | present    | UM                | wt                        | wt                                 | wt                       | 8823     | 33,8                 |
| 3518 | del13q            | absent     | UM                | wt                        | wt                                 | wt                       | 5220     | 17                   |
| 3525 | normal            | absent     | M                 | wt                        | wt                                 | wt                       | 5736     | 35,6                 |
| 3526 | normal            | absent     | M                 | wt                        | wt                                 | wt                       | 5199     | 27,6                 |
| 3527 | normal            | absent     | M                 | wt                        | wt                                 | wt                       | 48900    | 21,6                 |
| 3528 | del17p            | absent     | M                 | wt                        | wt                                 | mut                      | 8561     | 18,6                 |
| 3529 | normal            | absent     | M                 | wt                        | wt                                 | wt                       | 113648   | 1                    |
| 3531 | normal            | absent     | M                 | wt                        | wt                                 | wt                       | 5257     | 24,8                 |
| 3532 | normal            | absent     | M                 | wt                        | wt                                 | wt                       | 4417     | 21,6                 |
| 3533 | normal            | absent     | M                 | wt                        | wt                                 | wt                       | 5140     | 18,4                 |
| 3536 | tris12            | present    | M                 | wt                        | wt                                 | wt                       | 66702    | 1,4                  |
| 3537 | del13q            | absent     | M                 | wt                        | wt                                 | wt                       | 24774    | 11,8                 |
| 3538 | normal            | absent     | M                 | wt                        | wt                                 | wt                       | 101582   | 10,4                 |
| 3539 | normal            | absent     | M                 | wt                        | wt                                 | wt                       | 8034     | 4,4                  |
| 3541 | del13q            | absent     | n.a.              | wt                        | wt                                 | wt                       | 14740    | 39,2                 |
| 3543 | tris12            | present    | UM                | wt                        | wt                                 | wt                       | 22322    | 27,2                 |
| 3544 | tris12            | present    | UM                | wt                        | p.P2514Rfs*4 37.8%                 | wt                       | 19970    | 17,8                 |
| 3550 | tris12            | present    | M                 | wt                        | wt                                 | wt                       | 14278    | 11,2                 |
| 3551 | del13q            | absent     | M                 | wt                        | wt                                 | wt                       | 7497     | 16                   |
| 3552 | tris12            | present    | M                 | wt                        | wt                                 | wt                       | 43002    | -9,8                 |
| 3555 | normal            | absent     | M                 | wt                        | wt                                 | n.a.                     | 11511    | 11,6                 |
| 3558 | tris12            | present    | UM                | wt                        | p.P2514Rfs*4 47%                   | wt                       | 3643     | 27,2                 |
| 3559 | normal            | absent     | UM                | p.K666T 48%               | wt                                 | mut                      | 7836     | 20,2                 |
| 3560 | normal            | absent     | UM                | wt                        | p.P2514Rfs*4 8%                    | wt                       | 5293     | 22,8                 |
| 3561 | del13q            | absent     | M                 | p.K700E 39%               | wt                                 | wt                       | 4846     | 28,4                 |
| 3564 | normal            | absent     | UM                | wt                        | wt                                 | wt                       | 81317    | 14                   |
| 3565 | del13q            | absent     | M                 | wt                        | wt                                 | wt                       | 1603     | 56,8                 |
| 3566 | normal            | absent     | UM                | p.K700E 45%               | wt                                 | mut                      | 6043     | 25,4                 |
| 3569 | normal            | absent     | M                 | wt                        | wt                                 | wt                       | 8004     | 15,6                 |
| 3570 | del13q            | absent     | UM                | wt                        | wt                                 | wt                       | 10067    | 13,8                 |
| 3571 | del13q            | absent     | n.a.              | wt                        | wt                                 | wt                       | 7925     | 11,2                 |
| 3572 | del13q            | absent     | UM                | wt                        | wt                                 | wt                       | 5481     | 18,6                 |
| 3574 | del11q            | absent     | UM                | wt                        | wt                                 | wt                       | 8333     | 15,6                 |

| ID   | FISH <sup>A</sup> | Trisomy 12 | IGHV <sup>B</sup> | SF3B1 status <sup>C</sup>     | NOTCH1 status <sup>C</sup>             | TP53 status <sup>C</sup> | CD20 MFI | CD20dim fraction (%) |
|------|-------------------|------------|-------------------|-------------------------------|----------------------------------------|--------------------------|----------|----------------------|
| 3575 | normal            | absent     | UM                | wt                            | wt                                     | wt                       | 12195    | 34,2                 |
| 3576 | tris12            | present    | UM                | p.G740E 38%                   | wt                                     | wt                       | 7370     | 42,8                 |
| 3584 | tris12            | present    | M                 | wt                            | wt                                     | wt                       | 34757    | 5,6                  |
| 3585 | del13q            | absent     | M                 | wt                            | p.P2235Gfs*12 38%                      | wt                       | 15547    | 8,2                  |
| 3586 | normal            | absent     | M                 | wt                            | wt                                     | wt                       | 18592    | 4,2                  |
| 3589 | del13q            | absent     | M                 | wt                            | wt                                     | wt                       | 10174    | 8,4                  |
| 3590 | del11q            | absent     | UM                | wt                            | wt                                     | wt                       | 16561    | 12,6                 |
| 3593 | tris12            | present    | UM                | wt                            | p.P2514Rfs*4 37.4%                     | wt                       | 5031     | 30                   |
| 3594 | normal            | absent     | M                 | p.K700E 42%                   | wt                                     | wt                       | 12915    | 20,2                 |
| 3597 | del11q            | absent     | UM                | wt                            | wt                                     | wt                       | 10509    | 23,2                 |
| 3598 | del17p            | absent     | UM                | wt                            | wt                                     | n.a.                     | 5460     | 31,6                 |
| 3599 | tris12            | present    | UM                | wt                            | p.Q2503Gfs*3 33%;<br>p.V2504L 39%      | wt                       | 11337    | 14,8                 |
| 3603 | del13q            | absent     | M                 | wt                            | wt                                     | wt                       | 9844     | 12                   |
| 3606 | normal            | absent     | M                 | wt                            | wt                                     | wt                       | 5890     | 9,2                  |
| 3610 | normal            | absent     | M                 | wt                            | wt                                     | wt                       | 39747    | 32,8                 |
| 3613 | normal            | absent     | M                 | wt                            | wt                                     | mut                      | 5298     | 23,2                 |
| 3614 | del13q            | absent     | M                 | wt                            | wt                                     | wt                       | 12301    | 7,6                  |
| 3617 | del13q            | absent     | M                 | wt                            | wt                                     | wt                       | 4891     | 9,2                  |
| 3620 | del13q            | absent     | M                 | p.G740V 44%                   | wt                                     | wt                       | 17401    | 7,4                  |
| 3621 | del13q            | absent     | UM                | wt                            | p.R2431Gfs*4 23%;<br>p.P2514Rfs*4 3.6% | wt                       | 9507     | 15,4                 |
| 3622 | del13q            | absent     | M                 | wt                            | wt                                     | wt                       | 3701     | 32,8                 |
| 3624 | del11q            | absent     | UM                | wt                            | wt                                     | wt                       | 11965    | 29,8                 |
| 3625 | tris12            | present    | M                 | wt                            | wt                                     | wt                       | 123166   | 28,6                 |
| 3626 | normal            | absent     | M                 | wt                            | wt                                     | wt                       | 9170     | 4,6                  |
| 3627 | tris12            | present    | UM                | wt                            | wt                                     | mut                      | 15166    | 17,4                 |
| 3628 | normal            | absent     | UM                | p.K700E 34%                   | wt                                     | wt                       | 6957     | 16                   |
| 3632 | normal            | absent     | UM                | wt                            | p.P2514Rfs*4 34%;<br>p.Q2395K 3%       | wt                       | 4808     | 25                   |
| 3647 | del13q            | absent     | UM                | p.K700E 41.5%;<br>p.G742D 12% | wt                                     | wt                       | 4025     | 40,8                 |
| 3652 | del13q            | absent     | M                 | wt                            | wt                                     | wt                       | 7764     | 13,2                 |
| 3655 | normal            | absent     | M                 | wt                            | wt                                     | wt                       | 4570     | 21,2                 |
| 3657 | del13q            | absent     | DISC              | wt                            | wt                                     | wt                       | 1944     | -2,8                 |
| 3658 | normal            | absent     | M                 | wt                            | wt                                     | wt                       | 9496     | 21                   |
| 3663 | normal            | absent     | M                 | wt                            | wt                                     | mut                      | 20812    | 18,6                 |
| 3664 | del13q            | absent     | UM                | wt                            | wt                                     | wt                       | 13276    | 11,2                 |
| 3667 | tris12            | present    | M                 | wt                            | wt                                     | wt                       | 49583    | -4,8                 |
| 3674 | del13q            | absent     | M                 | wt                            | wt                                     | wt                       | 11143    | 23,8                 |
| 3675 | tris12            | present    | UM                | p.P780R 50%                   | wt                                     | wt                       | 3164     | 21,2                 |
| 3678 | del13q            | absent     | M                 | wt                            | wt                                     | wt                       | 11063    | 25,4                 |
| 3684 | normal            | absent     | M                 | wt                            | wt                                     | wt                       | 2606     | 21,6                 |
| 3699 | del11q            | absent     | UM                | wt                            | wt                                     | wt                       | 11944    | 21,6                 |
| 3700 | del11q            | absent     | UM                | wt                            | wt                                     | wt                       | 7616     | 10,2                 |
| 3701 | del11q            | absent     | UM                | wt                            | wt                                     | mut                      | 6373     | 51                   |
| 3702 | del13q            | absent     | UM                | p.G740E 37%                   | wt                                     | mut                      | 6629     | 16,6                 |
| 3704 | del17p            | absent     | M                 | wt                            | wt                                     | mut                      | 11640    | 15,2                 |

A: FISH status was determined according to Dal Bo et al., Leukemia 2016.

B: IGHV status was established according to the conventional cut-off, as reported in Dal Bo et al., Leukemia 2016.

C: as determined by Next Generation Sequencing.

ID: identification number; FISH: norm, normal karyotype; n.a., not available; IGHV status: UM, IGHV unmutated, M, IGHV mutated, DISC, Discordant.

**Supplementary Table 2. Association between SF3B1 mutations and biological prognosticators for CLL.**

|               |           | <b>SF3B1 [ n (%)]</b> |          | Chi-squared |
|---------------|-----------|-----------------------|----------|-------------|
|               |           | unmutated             | mutated  |             |
| <b>del11q</b> | absent    | 432 (80.4)            | 41 (7.6) | p=0.5507    |
|               | present   | 57 (10.6)             | 7 (1.3)  |             |
| <b>del13q</b> | absent    | 251 (46.7)            | 29 (5.4) | p=0.2295    |
|               | present   | 238 (44.3)            | 19 (3.5) |             |
| <b>tris12</b> | absent    | 374 (69.6)            | 42 (7.8) | p=0.0815    |
|               | present   | 115 (21.4)            | 6 (1.1)  |             |
| <b>del17p</b> | absent    | 437 (81.4)            | 43 (8)   | p=0.9628    |
|               | present   | 52 (9.7)              | 5 (0.9)  |             |
| <b>IGHV</b>   | M         | 260 (50.7)            | 12 (2.3) | p=0.0006    |
|               | UM        | 207 (40.4)            | 34 (6.6) |             |
| <b>NOTCH1</b> | unmutated | 406 (75.6)            | 42 (7.8) | p=0.4268    |
|               | mutated   | 83 (15.5)             | 6 (1.1)  |             |
| <b>TP53</b>   | unmutated | 405 (76.9)            | 33 (6.3) | p=0.0313    |
|               | mutated   | 76 (14.4)             | 13 (2.5) |             |

Supplementary Table 3. Differentially expressed probes between SF3B1-mut and WT CLL cases.

| Gene Symbol    | Description                                                                                                                               | Feature Type      | p-value  | Corrected p-value | Regulation in NOTCH1-mut | Fold change (Mut vs WT) | Position in Heatmap |
|----------------|-------------------------------------------------------------------------------------------------------------------------------------------|-------------------|----------|-------------------|--------------------------|-------------------------|---------------------|
| A_19_P00317504 | Homo sapiens cDNA FLJ42830 fis, clone BRCAN2017905. [AK124820]                                                                            | miscellaneous     | 1.25E-02 | 4.17E-07          | down                     | -2.14                   | Not used            |
| A_21_P0005204  | not provided                                                                                                                              | unannotated probe | 3.42E-02 | 1.14E-06          | down                     | -2.31                   | Not used            |
| A_21_P0006753  | AGENCOURT_8058623 NIH_MGC_102 Homo sapiens cDNA clone IMAGE:6213075 5', mRNA sequence [BU146091]                                          | miscellaneous     | 3.04E-02 | 1.02E-06          | down                     | -2.88                   | Not used            |
| A_21_P0008460  | numb homolog (Drosophila) [Source:HGNC Symbol;Acc:HGNC:8060] [ENST00000557577]                                                            | miscellaneous     | 3.70E-02 | 1.24E-06          | down                     | 6.38                    | Not used            |
| A_21_P0008678  | not provided                                                                                                                              | unannotated probe | 1.39E-02 | 4.64E-07          | down                     | -1.92                   | Not used            |
| A_21_P0011295  | hect domain and RLD 2 pseudogene 3 [Source:HGNC Symbol;Acc:HGNC:4871] [ENST00000429926]                                                   | pseudogene        | 1.80E-02 | 5.99E-07          | down                     | -3.03                   | Not used            |
| A_21_P0013340  | CCZ1 vacuolar protein trafficking and biogenesis associated homolog (S. cerevisiae) [Source:HGNC Symbol;Acc:HGNC:21691] [ENST00000478672] | miscellaneous     | 5.57E-03 | 1.85E-07          | down                     | -2.05                   | Not used            |
| A_21_P0014281  | BX096603 Soares_testis_NHT Homo sapiens cDNA clone IMAGP998H151782, mRNA sequence [BX096603]                                              | miscellaneous     | 1.03E-02 | 3.41E-07          | up                       | 3.72                    | Not used            |
| A_21_P0014386  | not provided                                                                                                                              | unannotated probe | 2.50E-02 | 8.34E-07          | down                     | -3.29                   | Not used            |
| A_21_P0014540  | not provided                                                                                                                              | unannotated probe | 2.43E-02 | 8.11E-07          | down                     | -3.51                   | Not used            |
| A_21_P0014591  | Q25I99_MACFA (Q25I99) Brain cDNA, clone: QfIA-19334, partial (47%) [THC2602892]                                                           | miscellaneous     | 2.08E-02 | 6.92E-07          | down                     | -2.50                   | Not used            |
| A_24_P126741   | glutaredoxin (thioltransferase) pseudogene 3 [Source:HGNC Symbol;Acc:HGNC:34049] [ENST00000470810]                                        | pseudogene        | 1.23E-06 | 4.05E-11          | up                       | 16.09                   | Not used            |
| A_24_P357468   | T cell receptor alpha variable 8-2 [Source:HGNC Symbol;Acc:HGNC:12147] [ENST00000390434]                                                  | miscellaneous     | 4.61E-03 | 1.53E-07          | up                       | 3.90                    | Not used            |
| A_33_P3232688  | colony stimulating factor 2 receptor, alpha, low-affinity (granulocyte-macrophage) [Source:HGNC Symbol;Acc:HGNC:2435] [ENST00000381524]   | miscellaneous     | 3.28E-04 | 1.08E-08          | up                       | 8.20                    | Not used            |
| A_33_P3243230  | HSINTLK8M interleukin 8 (Homo sapiens) (exp=-1; wgp=0; cg=0), partial (97%) [THC2544321]                                                  | miscellaneous     | 3.72E-08 | 1.22E-12          | up                       | 225.52                  | Not used            |
| A_33_P3269019  | Homo sapiens cDNA FLJ13275 fis, clone OVARC1001032. [AK023337]                                                                            | miscellaneous     | 4.86E-03 | 1.61E-07          | down                     | -3.14                   | Not used            |
| A_33_P3321372  | contactin associated protein-like 3B [Source:HGNC Symbol;Acc:HGNC:32035] [ENST00000276974]                                                | miscellaneous     | 3.30E-06 | 1.09E-10          | up                       | 33.00                   | Not used            |
| A_33_P3331791  | not provided                                                                                                                              | unannotated probe | 2.36E-02 | 7.88E-07          | down                     | -2.26                   | Not used            |
| A_33_P3338292  | not provided                                                                                                                              | unannotated probe | 1.63E-02 | 5.43E-07          | down                     | -3.06                   | Not used            |
| A_33_P3347503  | not provided                                                                                                                              | unannotated probe | 2.86E-02 | 9.56E-07          | up                       | 11.63                   | Not used            |
| A_33_P3352980  | not provided                                                                                                                              | unannotated probe | 6.83E-03 | 2.27E-07          | down                     | -2.39                   | Not used            |
| A_33_P3397127  | Homo sapiens mRNA for T cell receptor beta variable 6, partial cds, clone: un 226. [AB306238]                                             | miscellaneous     | 1.06E-03 | 3.52E-08          | up                       | 3.47                    | Not used            |
| A_33_P3421907  | nitric oxide synthase 2 pseudogene 1 [Source:HGNC Symbol;Acc:HGNC:7875] [ENST00000580780]                                                 | pseudogene        | 4.52E-02 | 1.51E-06          | down                     | -2.73                   | Not used            |
| AAK1           | Homo sapiens AP2 associated kinase 1 (AAK1), mRNA [NM_014911]                                                                             | gene              | 1.74E-07 | 5.71E-12          | up                       | 9.53                    | 1                   |
| AAK1           | Homo sapiens AP2 associated kinase 1 (AAK1), mRNA [NM_014911]                                                                             | gene              | 9.82E-03 | 3.27E-07          | up                       | 4.37                    | Not used            |
| AAK1           | Homo sapiens cDNA clone IMAGE:5226225. [BC090950]                                                                                         | miscellaneous     | 4.07E-02 | 1.36E-06          | up                       | 2.32                    | Not used            |
| ABI3           | Homo sapiens ABI family, member 3 (ABI3), transcript variant 1, mRNA [NM_016428]                                                          | gene              | 6.03E-04 | 1.99E-08          | up                       | 3.01                    | 2                   |
| ACPP           | Homo sapiens acid phosphatase, prostate (ACPP), transcript variant 1, mRNA [NM_001099]                                                    | gene              | 2.11E-03 | 6.98E-08          | up                       | 8.37                    | 3                   |
| ACSL1          | Homo sapiens acyl-CoA synthetase long-chain family member 1 (ACSL1), transcript variant 1, mRNA [NM_001995]                               | gene              | 1.82E-02 | 6.06E-07          | up                       | 3.40                    | 4                   |
| ACSL6          | Homo sapiens acyl-CoA synthetase long-chain family member 6 (ACSL6), transcript variant 2, mRNA [NM_00109185]                             | gene              | 1.29E-02 | 4.28E-07          | up                       | 4.30                    | 5                   |
| ACTL8          | Homo sapiens actin-like 8 (ACTL8), mRNA [NM_030812]                                                                                       | gene              | 3.68E-03 | 1.22E-07          | down                     | -2.29                   | 6                   |
| ACTN1          | Homo sapiens actinin, alpha 1 (ACTN1), transcript variant 2, mRNA [NM_001102]                                                             | gene              | 9.36E-07 | 3.08E-11          | up                       | 24.29                   | 7                   |
| ACVR1C         | Homo sapiens activin A receptor, type I C (ACVR1C), transcript variant 1, mRNA [NM_145259]                                                | gene              | 1.90E-03 | 6.31E-08          | up                       | 4.39                    | 8                   |
| ADAMTS10       | Homo sapiens ADAM metalloproteinase with thrombospondin type 1 motif, 10 (ADAMTS10), transcript variant 1, mRNA [NM_030957]               | gene              | 1.14E-03 | 3.78E-08          | up                       | 7.19                    | 9                   |
| ADM            | Homo sapiens adrenomedullin (ADM), mRNA [NM_001124]                                                                                       | gene              | 1.10E-02 | 3.66E-07          | up                       | 43.98                   | 10                  |
| AGPAT9         | Homo sapiens 1-acylglycerol-3-phosphate O-acyltransferase 9 (AGPAT9), transcript variant 1, mRNA [NM_032717]                              | gene              | 7.72E-03 | 2.56E-07          | up                       | 10.08                   | 11                  |
| AIF1           | Homo sapiens allograft inflammatory factor 1 (AIF1), transcript variant 2, mRNA [NM_004847]                                               | gene              | 5.70E-05 | 1.88E-09          | up                       | 10.63                   | 12                  |
| AKR1C3         | Homo sapiens aldo-keto reductase family 1, member C3 (AKR1C3), transcript variant 1, mRNA [NM_003739]                                     | gene              | 1.51E-05 | 4.99E-10          | up                       | 12.46                   | 13                  |
| AMPD2          | Homo sapiens adenosine monophosphate deaminase 2 (AMPD2), transcript variant 1, mRNA [NM_004037]                                          | gene              | 4.72E-03 | 1.57E-07          | up                       | 3.16                    | 14                  |
| ANPEP          | Homo sapiens alanyl (membrane) aminopeptidase (ANPEP), mRNA [NM_001150]                                                                   | gene              | 4.43E-03 | 1.47E-07          | up                       | 5.62                    | 15                  |
| ANXA1          | Homo sapiens annexin A1 (ANXA1), mRNA [NM_000700]                                                                                         | gene              | 4.17E-05 | 1.38E-09          | up                       | 52.11                   | 16                  |
| ANXA3          | Homo sapiens annexin A3 (ANXA3), mRNA [NM_005139]                                                                                         | gene              | 9.63E-08 | 3.16E-12          | up                       | 70.79                   | 17                  |
| AOAH           | Homo sapiens acylxyacetyl hydrolase (neutrophil) (AOAH), transcript variant 1, mRNA [NM_001637]                                           | gene              | 9.90E-03 | 3.09E-07          | up                       | 9.53                    | 18                  |
| APBA2          | amyloid beta (A4) precursor protein-binding, family A, member 2 [Source:HGNC Symbol;Acc:HGNC:579] [ENST00000382938]                       | gene              | 8.73E-03 | 2.92E-07          | up                       | 7.57                    | 19                  |
| APOBEC3A       | Homo sapiens apolipoprotein B mRNA editing enzyme, catalytic polypeptide-like 3A (APOBEC3A), transcript variant 1, mRNA [NM_145699]       | gene              | 8.93E-12 | 2.93E-16          | up                       | 238.50                  | 20                  |
| APOBEC3B       | Homo sapiens apolipoprotein B mRNA editing enzyme, catalytic polypeptide-like 3B (APOBEC3B), transcript variant 1, mRNA [NM_004900]       | gene              | 3.01E-05 | 9.94E-10          | up                       | 15.88                   | 21                  |
| APOBR          | Homo sapiens apolipoprotein B receptor (APOBR), mRNA [NM_018690]                                                                          | gene              | 1.45E-05 | 4.78E-10          | up                       | 28.85                   | 22                  |
| AQP9           | Homo sapiens aquaporin 9 (AQP9), mRNA [NM_020980]                                                                                         | gene              | 1.99E-14 | 6.52E-19          | up                       | 722.10                  | 23                  |
| ARAP3          | Homo sapiens ArfGAP with RhoGAP domain, ankyrin repeat and PH domain 3 (ARAP3), mRNA [NM_022481]                                          | gene              | 4.39E-09 | 1.44E-13          | up                       | 61.91                   | 24                  |
| ARG1           | Homo sapiens arginase 1 (ARG1), transcript variant 1, mRNA [NM_001244338]                                                                 | gene              | 1.52E-05 | 5.00E-10          | up                       | 48.07                   | 25                  |
| ARG1           | Homo sapiens arginase 1 (ARG1), transcript variant 1, mRNA [NM_001244338]                                                                 | gene              | 1.25E-05 | 4.11E-10          | up                       | 38.38                   | Not used            |
| ARHGAP26       | Homo sapiens Rho GTPase activating protein 26 (ARHGAP26), transcript variant 1, mRNA [NM_015071]                                          | gene              | 5.31E-03 | 1.77E-07          | up                       | 8.22                    | 26                  |
| ARPC2          | Homo sapiens actin related protein 2/3 complex, subunit 2, 34kDa (ARPC2), transcript variant 1, mRNA [NM_152862]                          | gene              | 3.27E-03 | 1.09E-07          | up                       | 1.73                    | 27                  |
| ARRB2          | Homo sapiens arrestin, beta 2 (ARRB2), transcript variant 1, mRNA [NM_004313]                                                             | gene              | 5.50E-03 | 1.76E-07          | up                       | 2.78                    | 28                  |
| ASAH1          | Homo sapiens N-acylsphingosine amidohydrolase (acid ceramidase) 1 (ASAH1), transcript variant 1, mRNA [NM_177924]                         | gene              | 3.77E-02 | 1.26E-06          | up                       | 2.12                    | 29                  |
| ASGR1          | Homo sapiens asialoglycoprotein receptor 1 (ASGR1), transcript variant 1, mRNA [NM_001671]                                                | gene              | 2.10E-02 | 7.00E-07          | up                       | 8.16                    | 30                  |
| ASPH           | Homo sapiens aspartate beta-hydroxylase (ASPH), transcript variant 4, mRNA [NM_032467]                                                    | gene              | 1.17E-06 | 3.85E-11          | up                       | 48.12                   | 31                  |
| ASPH           | Homo sapiens aspartate beta-hydroxylase (ASPH), transcript variant 1, mRNA [NM_004318]                                                    | gene              | 1.81E-02 | 6.02E-07          | up                       | 3.76                    | Not used            |
| ASRGL1         | Homo sapiens asparaginase like 1 (ASRGL1), transcript variant 1, mRNA [NM_001083926]                                                      | gene              | 2.24E-04 | 7.42E-09          | down                     | -2.67                   | 32                  |
| ATF7           | Homo sapiens activating transcription factor 7 (ATF7), transcript variant 4, mRNA [NM_001206682]                                          | gene              | 4.22E-02 | 1.41E-06          | up                       | 2.00                    | 33                  |
| ATP9A          | Homo sapiens ATPase, class II, type 9A (ATP9A), mRNA [NM_006045]                                                                          | gene              | 7.41E-04 | 2.45E-08          | up                       | 8.51                    | 34                  |
| B3GNT5         | Homo sapiens UDP-GlcNAc:betaGal beta-1,3-N-acetylglucosaminyltransferase 5 (B3GNT5), mRNA [NM_032047]                                     | gene              | 1.30E-10 | 4.28E-15          | up                       | 73.62                   | 35                  |
| BAIAP2L2       | Homo sapiens BAI1-associated protein 2-like 2 (BAIAP2L2), mRNA [NM_025045]                                                                | gene              | 4.30E-02 | 1.44E-06          | down                     | -2.82                   | 36                  |
| BASP1          | Homo sapiens brain abundant, membrane attached signal protein 1 (BASP1), transcript variant 1, mRNA [NM_006317]                           | gene              | 2.52E-03 | 8.36E-08          | up                       | 6.17                    | 37                  |
| BCL11B         | Homo sapiens B-cell CLL/lymphoma 11B (zinc finger protein) (BCL11B), transcript variant 1, mRNA [NM_138576]                               | gene              | 3.73E-05 | 1.23E-09          | up                       | 20.73                   | 38                  |
| BCL2A1         | Homo sapiens BCL2-related protein A1 (BCL2A1), transcript variant 1, mRNA [NM_004049]                                                     | gene              | 2.43E-05 | 8.01E-10          | up                       | 26.03                   | 39                  |
| BID            | Homo sapiens BH3 interacting domain death agonist (BID), transcript variant 1, mRNA [NM_197966]                                           | gene              | 2.46E-04 | 8.12E-09          | up                       | 8.81                    | 40                  |
| BID            | Homo sapiens BH3 interacting domain death agonist (BID), transcript variant 1, mRNA [NM_197966]                                           | gene              | 2.85E-04 | 9.42E-09          | up                       | 8.16                    | Not used            |
| BPI            | Homo sapiens bactericidal/permeability-increasing protein (BPI), mRNA [NM_001725]                                                         | gene              | 2.71E-04 | 8.96E-09          | up                       | 40.03                   | 41                  |
| BRI3           | Homo sapiens brain protein I3 (BRI3), transcript variant 1, mRNA [NM_015379]                                                              | gene              | 4.07E-02 | 1.36E-06          | up                       | 3.18                    | 42                  |
| BST1           | Homo sapiens bone marrow stromal cell antigen 1 (BST1), mRNA [NM_004334]                                                                  | gene              | 4.27E-05 | 1.41E-09          | up                       | 12.76                   | 43                  |
| BTNL8          | Homo sapiens butyrophilin-like 8 (BTNL8), transcript variant 2, mRNA [NM_001040462]                                                       | gene              | 4.43E-03 | 1.47E-07          | up                       | 17.88                   | 44                  |
| C10orf105      | Homo sapiens chromosome 10 open reading frame 105 (C10orf105), transcript variant 1, mRNA [NM_001164375]                                  | generic ORF       | 2.90E-02 | 9.69E-07          | up                       | 6.90                    | Not used            |
| C10orf54       | Homo sapiens chromosome 10 open reading frame 54 (C10orf54), mRNA [NM_022153]                                                             | generic ORF       | 2.36E-06 | 7.77E-11          | up                       | 8.14                    | Not used            |
| C12orf75       | Homo sapiens chromosome 12 open reading frame 75 (C12orf75), mRNA [NM_001145199]                                                          | generic ORF       | 2.47E-02 | 8.25E-07          | up                       | 9.05                    | Not used            |
| C19orf38       | Homo sapiens chromosome 19 open reading frame 38 (C19orf38), mRNA [NM_001136482]                                                          | generic ORF       | 2.38E-05 | 7.86E-10          | up                       | 3.50                    | Not used            |
| C1orf21        | Homo sapiens chromosome 1 open reading frame 21 (C1orf21), mRNA [NM_030860]                                                               | generic ORF       | 2.88E-05 | 9.50E-10          | up                       | 15.21                   | Not used            |
| C4orf50        | chromosome 4 open reading frame 50 [Source:HGNC Symbol;Acc:HGNC:33766] [ENST00000531445]                                                  | generic ORF       | 8.67E-03 | 2.88E-07          | up                       | 3.93                    | Not used            |
| CSAR1          | Homo sapiens complement component 5a receptor 1 (CSAR1), mRNA [NM_001736]                                                                 | gene              | 6.09E-08 | 2.00E-12          | up                       | 116.92                  | 45                  |
| CSAR2          | Homo sapiens complement component 5a receptor 2 (CSAR2), transcript variant 1, mRNA [NM_00121749]                                         | gene              | 4.45E-02 | 1.49E-06          | up                       | 2.66                    | 46                  |
| C8orf60        | Homo sapiens cDNA FLJ12193 fis, clone MAMMA1000856. [AK022255]                                                                            | miscellaneous     | 2.04E-03 | 6.76E-08          | up                       | 22.83                   | Not used            |
| CA4            | Homo sapiens carbonic anhydrase IV (CA4), mRNA [NM_000717]                                                                                | gene              | 9.78E-05 | 3.23E-09          | up                       | 9.27                    | 47                  |
| CACNA1I        | Homo sapiens calcium channel, voltage dependent, T type, alpha 1I subunit (CACNA1I), transcript variant 1, mRNA [NM_021096]               | gene              | 1.38E-03 | 4.56E-08          | up                       | 6.19                    | 48                  |
| CADM1          | Homo sapiens cell adhesion molecule 1 (CADM1), transcript variant 3, mRNA [NM_001301043]                                                  | gene              | 2.86E-04 | 9.45E-09          | up                       | 6.78                    | 49                  |
| CAMP           | Homo sapiens cathelicidin antimicrobial peptide (CAMP), mRNA [NM_004345]                                                                  | gene              | 8.99E-05 | 2.97E-09          | up                       | 128.82                  | 50                  |
| CATSPER1       | Homo sapiens cation channel, sperm associated 1 (CATSPER1), mRNA [NM_053054]                                                              | gene              | 1.60E-03 | 5.29E-08          | up                       | 6.32                    | 51                  |
| CCDC129        | coiled-coil domain containing 129 [Source:HGNC Symbol;Acc:HGNC:27363] [ENST00000409717]                                                   | gene              | 1.12E-02 | 3.72E-07          | down                     | -2.11                   | 52                  |
| CCDC147-AS1    | Homo sapiens CCDC147 antisense RNA 1 (head to head) (CCDC147-AS1), long non-coding RNA [NR_108036]                                        | ncRNA             | 2.25E-02 | 7.52E-07          | up                       | 15.22                   | Not used            |
| CCDC149        | Homo sapiens coiled-coil domain containing 149 (CCDC149), transcript variant 1, mRNA [NM_173463]                                          | gene              | 1.58E-03 | 5.22E-08          | up                       | 6.10                    | 53                  |
| CCDC149        | Homo sapiens coiled-coil domain containing 149 (CCDC149), transcript variant 1, mRNA [NM_173463]                                          | gene              | 3.10E-03 | 1.03E-07          | up                       | 5.09                    | Not used            |
| CCL4L2         | Homo sapiens chemokine (C-C motif) ligand 4-like 2 (CCL4L2), transcript variant CCL4L2b2, mRNA [NM_001291470]                             | gene              | 8.68E-03 | 2.89E-07          | up                       | 20.07                   | 54                  |
| CCL4L2         | Homo sapiens chemokine (C-C motif) ligand 4-like 2 (CCL4L2), transcript variant CCL4L2b2, mRNA [NM_001291470]                             | gene              | 3.02E-03 | 1.00E-07          | up                       | 8.85                    | Not used            |
| CCL4L2         | Homo sapiens chemokine (C-C motif) ligand 4-like 2 (CCL4L2), transcript variant CCL4L2b2, mRNA [NM_001291470]                             | gene              | 1.97E-02 | 6.57E-07          | up                       | 5.62                    | Not used            |
| CCL5           | Homo sapiens chemokine (C-C motif) ligand 5 (CCL5), transcript variant 1, mRNA [NM_002985]                                                | gene              | 4.15E-04 | 1.37E-08          | up                       | 14.99                   | 55                  |
| CCNL1          | Homo sapiens cyclin J-like (CCNL1), mRNA [NM_024565]                                                                                      | gene              | 1.80E-03 | 5.95E-08          | up                       | 11.94                   | 56                  |
| CCNL2          | Homo sapiens cyclin L2 (CCNL2), transcript variant 1, mRNA [NM_030937]                                                                    | gene              | 1.63E-02 | 5.42E-07          | down                     | -1.93                   | 57                  |
| CCR1           | Homo sapiens chemokine (C-C motif) receptor 1 (CCR1), mRNA [NM_001295]                                                                    | gene              | 5.28E-12 | 1.73E-16          | up                       | 161.86                  | 58                  |
| CCR3           | Homo sapiens chemokine (C-C motif) receptor 3 (CCR3), transcript variant 1, mRNA [NM_001837]                                              | gene              | 1.76E-02 | 5.87E-07          | up                       | 8.67                    | 59                  |
| CCR5           | Homo sapiens chemokine (C-C motif) receptor 5 (gene/pseudogene) (CCR5), transcript variant A, mRNA [NM_000579]                            | gene              | 2.78E-03 | 9.23E-08          | up                       | 2.70                    | 60                  |
| CD14           | Homo sapiens CD14 molecule (CD14), transcript variant 3, mRNA [NM_001174104]                                                              | gene              | 2.35E-08 | 7.73E-13          | up                       | 37.46                   | 61                  |
| CD163          | Homo sapiens CD163 molecule (CD163), transcript variant 1, mRNA [NM_004244]                                                               | gene              | 1.63E-02 | 1.15E-06          | up                       | 22.03                   | 62                  |
| CD2            | Homo sapiens CD2 molecule (CD2), mRNA [NM_001767]                                                                                         | gene              | 4.01E-05 | 1.32E-09          | up                       | 15.35                   | 63                  |
| CD226          | CD226 molecule [Source:HGNC Symbol;Acc:HGNC:16961] [ENST00000280200]                                                                      | gene              | 1.58E-06 | 5.22E-11          | up                       | 3.61                    | 64                  |
| CD244          | Homo sapiens CD244 molecule, natural killer cell receptor 2B4 (CD244), transcript variant 1, mRNA [NM_016382]                             | gene              | 4.60E-05 | 1.52E-09          | up                       | 4.30                    | 65                  |
| CD247          | Homo sapiens CD247 molecule (CD247), transcript variant 1, mRNA [NM_198053]                                                               | gene              | 6.35E-05 | 2.10E-09          | up</                     |                         |                     |

| Gene Symbol | Description                                                                                                                                      | Feature Type          | p-value  | Corrected p-value | Regulation in NOTCH1-mut | Fold change (Mut vs WT) | Position in Heatmap |
|-------------|--------------------------------------------------------------------------------------------------------------------------------------------------|-----------------------|----------|-------------------|--------------------------|-------------------------|---------------------|
| CD8A        | Homo sapiens CD8a molecule (CD8A), transcript variant 1, mRNA [NM_001768]                                                                        | gene                  | 4.80E-03 | 1.59E-07          | up                       | 17.86                   | 77                  |
| CD8B        | Homo sapiens CD8b molecule (CD8B), transcript variant 5, mRNA [NM_004931]                                                                        | gene                  | 1.16E-02 | 3.87E-07          | up                       | 22.55                   | 78                  |
| CD8B        | Homo sapiens CD8b molecule (CD8B), transcript variant 4, mRNA [NM_172102]                                                                        | gene                  | 9.35E-05 | 3.09E-09          | up                       | 9.51                    | Not used            |
| CD8B        | Homo sapiens CD8b molecule (CD8B), transcript variant 5, mRNA [NM_004931]                                                                        | gene                  | 1.77E-02 | 5.91E-07          | up                       | 7.02                    | Not used            |
| CD93        | Homo sapiens CD93 molecule (CD93), mRNA [NM_012072]                                                                                              | gene                  | 3.89E-06 | 1.28E-10          | up                       | 24.05                   | 79                  |
| CDA         | Homo sapiens cytidine deaminase (CDA), mRNA [NM_001785]                                                                                          | gene                  | 3.97E-06 | 1.31E-10          | up                       | 15.81                   | 80                  |
| CDK5RAP3    | Homo sapiens CDK5 regulatory subunit associated protein 3 (CDK5RAP3), transcript variant 5, mRNA [NM_001278198]                                  | gene                  | 2.70E-02 | 9.01E-07          | down                     | -2.04                   | 81                  |
| CEACAM8     | Homo sapiens carcinoembryonic antigen-related cell adhesion molecule 8 (CEACAM8), mRNA [NM_001816]                                               | gene                  | 5.86E-06 | 1.93E-10          | up                       | 84.75                   | 82                  |
| CEBPA       | Homo sapiens CCAAT/enhancer binding protein (C/EBP), alpha (CEBPA), transcript variant 1, mRNA [NM_004364]                                       | gene                  | 1.04E-03 | 3.44E-08          | up                       | 16.25                   | 83                  |
| CEBPB       | Homo sapiens CCAAT/enhancer binding protein (C/EBP), beta (CEBPB), transcript variant 1, mRNA [NM_005194]                                        | gene                  | 2.21E-04 | 7.31E-09          | up                       | 10.75                   | 84                  |
| CEBPE       | Homo sapiens CCAAT/enhancer binding protein (C/EBP), epsilon (CEBPE), mRNA [NM_001805]                                                           | gene                  | 2.36E-02 | 7.88E-07          | up                       | 8.20                    | 85                  |
| CECR2       | PREDICTED: Homo sapiens cat eye syndrome chromosome region, candidate 2 (CECR2), transcript variant X3, mRNA [XM_006724079]                      | gene                  | 2.23E-02 | 7.43E-07          | down                     | -1.90                   | 86                  |
| CECR7       | Homo sapiens cat eye syndrome chromosome region, candidate 7 (non-protein coding) (CECR7), long non-coding RNA [NR_015352]                       | gene                  | 2.30E-02 | 7.69E-07          | down                     | -1.88                   | 87                  |
| CE1         | Homo sapiens carboxylesterase 1 (CE1), transcript variant 1, mRNA [NM_001025195]                                                                 | gene                  | 1.41E-04 | 4.66E-09          | up                       | 33.28                   | 88                  |
| CFD         | Homo sapiens complement factor D (adipsin) (CFD), mRNA [NM_001928]                                                                               | gene                  | 6.01E-04 | 1.99E-08          | up                       | 45.97                   | 89                  |
| CFP         | Homo sapiens complement factor properdin (CFP), transcript variant 1, mRNA [NM_002621]                                                           | gene                  | 2.22E-03 | 7.37E-08          | up                       | 11.07                   | 90                  |
| CHI3L1      | Homo sapiens chitinase 3-like 1 (cartilage glycoprotein-39) (CHI3L1), mRNA [NM_001276]                                                           | gene                  | 3.19E-05 | 1.05E-09          | up                       | 67.08                   | 91                  |
| CHN2        | Homo sapiens chimerin 2 (CHN2), transcript variant 4, mRNA [NM_001293007]                                                                        | gene                  | 8.56E-04 | 2.83E-08          | up                       | 7.68                    | 92                  |
| CLC         | capicua transcriptional repressor [Source:HGNC Symbol;Acc:HGNC:14214] [ENST00000572681]                                                          | gene                  | 7.06E-03 | 2.35E-07          | down                     | -1.88                   | 93                  |
| CLC         | Homo sapiens Charcot-Leyden crystal galectin (CLC), mRNA [NM_001828]                                                                             | gene                  | 8.84E-09 | 2.90E-13          | up                       | 71.75                   | 94                  |
| CLEC11A     | Homo sapiens C-type lectin domain family 11, member A (CLEC11A), mRNA [NM_002975]                                                                | gene                  | 1.24E-02 | 4.13E-07          | up                       | 6.69                    | 95                  |
| CLEC4A      | Homo sapiens C-type lectin domain family 4, member A (CLEC4A), transcript variant 1, mRNA [NM_016184]                                            | gene                  | 2.98E-02 | 9.95E-07          | up                       | 3.66                    | 96                  |
| CLEC4D      | Homo sapiens C-type lectin domain family 4, member D (CLEC4D), mRNA [NM_080387]                                                                  | gene                  | 5.79E-08 | 1.90E-12          | up                       | 36.35                   | 97                  |
| CLEC4D      | Homo sapiens C-type lectin domain family 4, member D (CLEC4D), mRNA [NM_080387]                                                                  | gene                  | 1.52E-06 | 4.99E-11          | up                       | 28.80                   | Not used            |
| CLEC7A      | Homo sapiens C-type lectin domain family 7, member A (CLEC7A), transcript variant 6, mRNA [NM_197954]                                            | gene                  | 5.51E-11 | 1.81E-15          | up                       | 61.46                   | 98                  |
| CMTM2       | Homo sapiens CDF-like MARVEL transmembrane domain containing 2 (CMTM2), transcript variant 1, mRNA [NM_144673]                                   | gene                  | 4.63E-04 | 1.53E-08          | up                       | 38.46                   | 99                  |
| CREB5       | Homo sapiens cAMP responsive element binding protein 5 (CREB5), transcript variant 1, mRNA [NM_182898]                                           | gene                  | 1.20E-04 | 3.95E-09          | up                       | 22.22                   | 100                 |
| CRISPLD2    | Homo sapiens cysteine-rich secretory protein LCCL domain containing 2 (CRISPLD2), mRNA [NM_031476]                                               | gene                  | 1.21E-05 | 7.09E-10          | up                       | 3.26                    | 101                 |
| CRTAM       | Homo sapiens cytotoxic and regulatory T cell molecule (CRTAM), mRNA [NM_019604]                                                                  | gene                  | 1.94E-02 | 6.48E-07          | up                       | 8.29                    | 102                 |
| CSF2RA      | Homo sapiens colony stimulating factor 2 receptor, alpha, low-affinity (granulocyte-macrophage) (CSF2RA), transcript variant 6, mRNA [NM_172249] | gene                  | 1.53E-05 | 5.05E-10          | up                       | 11.86                   | 103                 |
| CSF3R       | Homo sapiens colony stimulating factor 3 receptor (granulocyte) (CSF3R), transcript variant 3, mRNA [NM_156039]                                  | gene                  | 4.23E-10 | 1.39E-14          | up                       | 88.29                   | 104                 |
| CSGALNACT1  | Homo sapiens chondroitin sulfate N-acetylgalactosaminyltransferase 1 (CSGALNACT1), transcript variant 2, mRNA [NM_018371]                        | gene                  | 1.11E-04 | 3.66E-09          | up                       | 14.42                   | 105                 |
| CSGALNACT1  | Homo sapiens chondroitin sulfate N-acetylgalactosaminyltransferase 1 (CSGALNACT1), transcript variant 1, mRNA [NM_001130518]                     | gene                  | 1.13E-02 | 3.76E-07          | up                       | 9.39                    | Not used            |
| CST7        | Homo sapiens cystatin F (leukocystatin) (CST7), mRNA [NM_003650]                                                                                 | gene                  | 2.56E-06 | 8.42E-11          | up                       | 27.24                   | 106                 |
| CSTA        | Homo sapiens cystatin A (stefin A) (CSTA), mRNA [NM_005213]                                                                                      | gene                  | 1.50E-08 | 4.93E-13          | up                       | 64.31                   | 107                 |
| CTSG        | Homo sapiens cathepsin G (CTSG), mRNA [NM_001911]                                                                                                | gene                  | 1.42E-02 | 4.72E-07          | up                       | 30.68                   | 108                 |
| CX3CR1      | Homo sapiens chemokine (C-X3-C motif) receptor 1 (CX3CR1), transcript variant 4, mRNA [NM_001337]                                                | gene                  | 4.80E-02 | 1.60E-06          | up                       | 16.15                   | 109                 |
| CXCL1       | Homo sapiens chemokine (C-X-C motif) ligand 1 (melanoma growth stimulating activity, alpha) (CXCL1), transcript variant 1, mRNA [NM_001511]      | gene                  | 2.28E-06 | 7.49E-11          | up                       | 151.17                  | 110                 |
| CXCL8       | Homo sapiens chemokine (C-X-C motif) ligand 8 (CXCL8), mRNA [NM_000584]                                                                          | gene                  | 1.13E-07 | 3.73E-12          | up                       | 395.16                  | 111                 |
| CXCR1       | Homo sapiens chemokine (C-X-C motif) receptor 1 (CXCR1), mRNA [NM_000634]                                                                        | gene                  | 2.19E-05 | 7.22E-10          | up                       | 22.32                   | 112                 |
| CXCR2       | Homo sapiens chemokine (C-X-C motif) receptor 2 (CXCR2), transcript variant 1, mRNA [NM_001557]                                                  | gene                  | 8.97E-08 | 2.95E-12          | up                       | 85.88                   | 113                 |
| Xcorf57     | Homo sapiens chromosome X open reading frame 57 (Xcorf57), transcript variant 1, mRNA [NM_018015]                                                | gene                  | 3.72E-03 | 1.24E-07          | up                       | 5.62                    | 114                 |
| CYP1B1      | Homo sapiens cytochrome P450, family 1, subfamily B, polypeptide 1 (CYP1B1), mRNA [NM_000104]                                                    | gene                  | 5.43E-06 | 1.79E-10          | up                       | 14.51                   | 115                 |
| CYP27A1     | Homo sapiens cytochrome P450, family 27, subfamily A, polypeptide 1 (CYP27A1), mRNA [NM_000784]                                                  | gene                  | 2.34E-06 | 7.72E-11          | up                       | 53.24                   | 116                 |
| CYP4F3      | Homo sapiens cytochrome P450, family 4, subfamily F, polypeptide 3 (CYP4F3), transcript variant 1, mRNA [NM_000896]                              | gene                  | 2.05E-03 | 6.78E-08          | up                       | 25.53                   | 117                 |
| CYTH1       | cytohesin 1 [Source:HGNC Symbol;Acc:HGNC:9501] [ENST00000586299]                                                                                 | gene                  | 3.65E-04 | 1.21E-08          | down                     | -1.98                   | 118                 |
| CYTH3       | Homo sapiens cytohesin 3 (CYTH3), mRNA [NM_004227]                                                                                               | gene                  | 1.03E-03 | 3.40E-08          | up                       | 4.19                    | 119                 |
| DACH1       | Homo sapiens dachshund family transcription factor 1 (DACH1), transcript variant 1, mRNA [NM_080759]                                             | gene                  | 1.18E-05 | 3.90E-10          | up                       | 6.72                    | 120                 |
| DEFA3       | Homo sapiens defensin, alpha 3, neutrophil-specific (DEFA3), mRNA [NM_005217]                                                                    | gene                  | 6.07E-06 | 2.00E-10          | up                       | 1252.22                 | 121                 |
| DEFA4       | Homo sapiens defensin, alpha 4, corticostatin (DEFA4), mRNA [NM_001925]                                                                          | gene                  | 1.20E-06 | 3.96E-11          | up                       | 191.87                  | 122                 |
| DENN3       | DENN/MADD domain containing 3 [Source:HGNC Symbol;Acc:HGNC:29134] [ENST00000520482]                                                              | gene                  | 1.88E-04 | 6.22E-09          | up                       | 31.25                   | 123                 |
| DENN3       | Homo sapiens DENN/MADD domain containing 3 (DENN3), mRNA [NM_014957]                                                                             | gene                  | 1.01E-05 | 3.31E-10          | up                       | 12.08                   | Not used            |
| DGAT2       | Homo sapiens diacylglycerol O-acyltransferase 2 (DGAT2), transcript variant 1, mRNA [NM_032564]                                                  | gene                  | 3.51E-03 | 1.16E-07          | up                       | 8.08                    | 124                 |
| DHRS3       | Homo sapiens dehydrogenase/reductase (SDR family) member 3 (DHRS3), mRNA [NM_004753]                                                             | gene                  | 6.03E-04 | 2.00E-08          | up                       | 16.56                   | 125                 |
| DLG5        | Homo sapiens discs, large homolog 5 (Drosophila) (DLG5), mRNA [NM_004747]                                                                        | gene                  | 3.19E-02 | 1.07E-06          | up                       | 4.16                    | 126                 |
| DNMT1       | Homo sapiens DNA (cytosine-5)-methyltransferase 1 (DNMT1), transcript variant 1, mRNA [NM_001130823]                                             | gene                  | 1.50E-02 | 4.99E-07          | up                       | 2.12                    | 127                 |
| DOCK5       | Homo sapiens dedicator of cytokinesis 5 (DOCK5), mRNA [NM_024940]                                                                                | gene                  | 5.23E-06 | 7.33E-11          | up                       | 9.02                    | 128                 |
| DOCK5       | Homo sapiens dedicator of cytokinesis 5 (DOCK5), mRNA [NM_024940]                                                                                | gene                  | 5.25E-06 | 1.82E-10          | up                       | 7.53                    | Not used            |
| EIF4E3      | Homo sapiens eukaryotic translation initiation factor 4E family member 3 (EIF4E3), transcript variant 2, mRNA [NM_173359]                        | gene                  | 1.09E-04 | 3.60E-09          | up                       | 11.79                   | 129                 |
| EMR2        | Homo sapiens egf-like module containing, mucin-like, hormone receptor-like 2 (EMR2), transcript variant 1, mRNA [NM_013447]                      | gene                  | 1.98E-10 | 6.51E-15          | up                       | 50.75                   | 130                 |
| EMR3        | Homo sapiens egf-like module containing, mucin-like, hormone receptor-like 3 (EMR3), transcript variant 1, mRNA [NM_032571]                      | gene                  | 6.95E-06 | 2.29E-10          | up                       | 26.45                   | 131                 |
| EOMES       | Homo sapiens eomesodermin (EOMES), transcript variant 2, mRNA [NM_005442]                                                                        | gene                  | 3.05E-03 | 1.01E-07          | up                       | 11.79                   | 132                 |
| EPAS1       | Homo sapiens endothelial PAS domain protein 1 (EPAS1), mRNA [NM_001430]                                                                          | gene                  | 1.58E-07 | 5.19E-12          | up                       | 16.04                   | 133                 |
| ETS2        | Homo sapiens v-ets avian erythroblastosis virus E26 oncogene homolog 2 (ETS2), transcript variant 1, mRNA [NM_005239]                            | gene                  | 2.23E-10 | 7.31E-15          | up                       | 25.44                   | 134                 |
| F2R         | Homo sapiens coagulation factor II (thrombin) receptor, mRNA (cDNA clone IMAGE:4849569), with apparent retained intron. [BC010659]               | miscellaneous         | 2.38E-03 | 7.88E-08          | up                       | 16.32                   | 135                 |
| F2R         | Homo sapiens coagulation factor II (thrombin) receptor (F2R), mRNA [NM_001992]                                                                   | gene                  | 1.81E-04 | 5.97E-09          | up                       | 7.57                    | Not used            |
| FAM101B     | Homo sapiens family with sequence similarity 101, member B (FAM101B), mRNA [NM_182705]                                                           | gene                  | 5.05E-08 | 1.66E-12          | up                       | 91.55                   | 136                 |
| FAM105A     | Homo sapiens family with sequence similarity 105, member A (FAM105A), mRNA [NM_019018]                                                           | gene                  | 1.41E-02 | 4.68E-07          | up                       | 12.11                   | 137                 |
| FAM129A     | Homo sapiens family with sequence similarity 129, member A (FAM129A), mRNA [NM_052966]                                                           | gene                  | 1.46E-06 | 4.61E-11          | up                       | 77.21                   | 138                 |
| FAM13A      | Homo sapiens family with sequence similarity 13, member A (FAM13A), transcript variant 1, mRNA [NM_014883]                                       | gene                  | 1.40E-04 | 4.82E-09          | up                       | 7.30                    | 139                 |
| FAM169A     | Homo sapiens family with sequence similarity 169, member A (FAM169A), transcript variant 1, mRNA [NM_015566]                                     | gene                  | 1.28E-03 | 4.25E-08          | up                       | 13.65                   | 140                 |
| FAM169A     | Homo sapiens family with sequence similarity 169, member A (FAM169A), transcript variant 1, mRNA [NM_015566]                                     | gene                  | 2.87E-02 | 9.57E-07          | up                       | 6.22                    | Not used            |
| FAM212A     | Homo sapiens family with sequence similarity 212, member A (FAM212A), mRNA [NM_203370]                                                           | gene                  | 1.64E-02 | 5.46E-07          | down                     | -1.67                   | 141                 |
| FAM49B      | Homo sapiens family with sequence similarity 49, member B (FAM49B), transcript variant 2, mRNA [NM_016623]                                       | gene                  | 1.37E-04 | 4.53E-09          | up                       | 2.76                    | 142                 |
| FAR2        | Homo sapiens fatty acyl CoA reductase 2 (FAR2), transcript variant 2, mRNA [NM_018099]                                                           | gene                  | 1.20E-02 | 4.01E-07          | up                       | 4.49                    | 143                 |
| FAS         | Homo sapiens Fas cell surface death receptor (FAS), transcript variant 1, mRNA [NM_000043]                                                       | gene                  | 3.09E-02 | 1.03E-06          | up                       | 4.07                    | 144                 |
| FAS         | Homo sapiens Fas cell surface death receptor (FAS), transcript variant 1, mRNA [NM_000043]                                                       | gene                  | 1.90E-02 | 6.34E-07          | up                       | 3.70                    | Not used            |
| FAS         | Homo sapiens Fas cell surface death receptor (FAS), transcript variant 1, mRNA [NM_000043]                                                       | gene                  | 4.89E-02 | 1.63E-06          | up                       | 3.50                    | Not used            |
| FCAR        | Homo sapiens Fc fragment of IgA, receptor for (FCAR), transcript variant 3, mRNA [NM_133271]                                                     | gene                  | 6.63E-08 | 2.18E-12          | up                       | 106.78                  | 145                 |
| FCAR        | Homo sapiens Fc fragment of IgA, receptor for (FCAR), transcript variant 1, mRNA [NM_002000]                                                     | gene                  | 1.52E-06 | 5.00E-11          | up                       | 32.62                   | Not used            |
| FCER1G      | Homo sapiens Fc fragment of IgE, high affinity I, receptor for; gamma polypeptide (FCER1G), mRNA [NM_004106]                                     | gene                  | 2.75E-05 | 9.08E-10          | up                       | 11.80                   | 146                 |
| FCGR1B      | Homo sapiens Fc fragment of IgG, high affinity I, receptor (CD64) (FCGR1B), transcript variant 1, mRNA [NM_001017986]                            | gene                  | 8.83E-05 | 2.75E-09          | up                       | 41.87                   | 147                 |
| FCGR1B      | Homo sapiens Fc fragment of IgG, high affinity I, receptor (CD64) (FCGR1B), transcript variant 3, mRNA [NM_001244910]                            | gene                  | 6.39E-05 | 2.27E-09          | up                       | 16.39                   | Not used            |
| FCGR1B      | Homo sapiens Fc fragment of IgG, high affinity I, receptor (CD64) (FCGR1B), transcript variant 3, mRNA [NM_001244910]                            | gene                  | 5.56E-04 | 1.84E-08          | up                       | 14.10                   | Not used            |
| FCGR2C      | Homo sapiens Fc fragment of IgG, low affinity IIc, receptor for (CD32) (gene/pseudogene) (FCGR2C), transcript variant 1, mRNA [NM_201563]        | gene                  | 3.26E-03 | 1.08E-07          | up                       | 11.48                   | 148                 |
| FCGR3A      | Homo sapiens Fc fragment of IgG, low affinity IIIa, receptor (CD16a) (FCGR3A), transcript variant 1, mRNA [NM_000569]                            | gene                  | 2.46E-07 | 8.08E-12          | up                       | 201.74                  | 149                 |
| FCN1        | Homo sapiens ficolin (collagen/fibrinogen domain containing) 1 (FCN1), mRNA [NM_002003]                                                          | gene                  | 1.54E-06 | 5.08E-11          | up                       | 84.34                   | 150                 |
| FCN1        | Homo sapiens ficolin (collagen/fibrinogen domain containing) 1 (FCN1), mRNA [NM_002003]                                                          | gene                  | 1.28E-06 | 4.20E-11          | up                       | 43.63                   | Not used            |
| FEZ1        | Homo sapiens fasciculation and elongation protein zeta 1 (zyglin I) (FEZ1), transcript variant 1, mRNA [NM_005103]                               | gene                  | 1.72E-02 | 5.73E-07          | up                       | 2.74                    | 151                 |
| FFAR2       | Homo sapiens free fatty acid receptor 2 (FFAR2), mRNA [NM_005306]                                                                                | gene                  | 4.68E-04 | 1.55E-08          | up                       | 15.90                   | 152                 |
| FGD4        | Homo sapiens FYVE, RhoGEF and PH domain containing 4 (FGD4), mRNA [NM_139241]                                                                    | gene                  | 4.08E-06 | 1.34E-10          | up                       | 19.70                   | 153                 |
| FGD4        | Homo sapiens FYVE, RhoGEF and PH domain containing 4 (FGD4), mRNA [NM_139241]                                                                    | gene                  | 7.12E-06 | 2.35E-10          | up                       | 9.98                    | Not used            |
| FGD4        | FYVE, RhoGEF and PH domain containing 4 [Source:HGNC Symbol;Acc:HGNC:19125] [ENST00000472289]                                                    | gene                  | 4.29E-05 | 1.41E-09          | up                       | 9.08                    | Not used            |
| FGFBP2      | Homo sapiens fibroblast growth factor binding protein 2 (FGFBP2), mRNA [NM_031950]                                                               | gene                  | 2.07E-04 | 6.84E-09          | up                       | 21.69                   | 154                 |
| FLJ36777    | uncharacterized LOC730971 [Source:EntrezGene;Acc:730971] [ENST00000501888]                                                                       | uncharacterized locus | 2.69E-02 | 8.99E-07          | down                     | -1.78                   | Not used            |
| FNDC3B      | Homo sapiens fibronectin type III domain containing 3B (FNDC3B), transcript variant 1, mRNA [NM_022763]                                          | gene                  | 1.32E-02 | 4.39E-07          | up                       | 7.25                    | 155                 |
| FNDC3B      | Homo sapiens fibronectin type III domain containing 3B (FNDC3B), transcript variant 1, mRNA [NM_022763]                                          | gene                  | 7.83E-04 | 2.59E-08          | up                       | 4.77                    | Not used            |
| FNIP2       | Homo sapiens follistatin interacting protein 2 (FNIP2), mRNA [NM_020840]                                                                         | gene                  | 3.25E-02 | 1.09E-06          | up                       | 14.77                   | 156                 |
| FOLR3       | Homo sapiens folate receptor 3 (gamma) (FOLR3), mRNA [NM_000804]                                                                                 | gene                  | 6.96E-10 | 2.28E-14          | up                       | 19.76                   | 157                 |
| FOSL2       | Homo sapiens FOS-like antigen 2 (FOSL2), mRNA [NM_005253]                                                                                        | gene                  | 6.63E-04 | 2.19E-08          | up                       | 31.32                   | 158                 |
| FPR1        | Homo sapiens formyl peptide receptor 1 (FPR1), transcript variant 2, mRNA [NM_002029]                                                            | gene                  | 3.52E-12 | 1.16E-16          | up                       | 377.81                  | 159                 |
| FPR2        | Homo sapiens formyl peptide receptor 2 (FPR2), transcript variant 1, mRNA [NM_001462]                                                            | gene                  | 8.09E-10 | 2.65E-14          | up                       | 43.69                   | 160                 |
| FTH1        | Homo sapiens ferritin, heavy polypeptide 1 (FTH1), mRNA [NM_002032]                                                                              | gene                  | 4.04E-03 | 1.34E-07          | up                       | 1.78                    | 161                 |
| FYB         | Homo sapiens FYN binding protein (FYB), transcript variant 1, mRNA [NM_001465]                                                                   | gene                  | 5.05E-08 | 1.66E-12          | up                       | 98.07                   | 162                 |
| G0S2        | Homo sapiens G0/G1 switch 2 (G0S2), mRNA [NM_015714]                                                                                             | gene                  | 4.97E-10 | 1.63E-14          | up                       | 857.35                  | 163                 |
|             |                                                                                                                                                  |                       |          |                   |                          |                         |                     |



| Gene Symbol   | Description                                                                                                                                            | Feature Type        | P-value  | Corrected P-value | Regulation in NOTCH1-mut | Fold change (Mut vs WT) | Position in Heatmap |
|---------------|--------------------------------------------------------------------------------------------------------------------------------------------------------|---------------------|----------|-------------------|--------------------------|-------------------------|---------------------|
| GNGT2         | Homo sapiens guanine nucleotide binding protein (G protein), gamma transducing activity polypeptide 2 (GNGT2), transcript variant 1, mRNA [NM_031498]  | gene                | 1.24E-02 | 4.14E-07          | up                       | 5.95                    | 177                 |
| GOLGA7        | Homo sapiens golgin A7 (GOLGA7), transcript variant 2, mRNA [NM_001002296]                                                                             | gene                | 9.75E-03 | 3.24E-07          | up                       | 2.36                    | 178                 |
| GOLGA7        | Homo sapiens golgin A7 (GOLGA7), transcript variant 2, mRNA [NM_001002296]                                                                             | gene                | 3.53E-02 | 1.18E-06          | up                       | 2.16                    | Not used            |
| GOLGA7        | Homo sapiens golgin A7 (GOLGA7), transcript variant 2, mRNA [NM_001002296]                                                                             | gene                | 4.08E-02 | 1.36E-06          | up                       | 2.15                    | Not used            |
| GRP56         | Homo sapiens G protein-coupled receptor 56 (GRP56), transcript variant 3, mRNA [NM_201525]                                                             | gene                | 1.84E-02 | 6.14E-07          | up                       | 25.82                   | 179                 |
| GRP84         | Homo sapiens G protein-coupled receptor 84 (GRP84), mRNA [NM_020370]                                                                                   | gene                | 1.21E-02 | 4.02E-07          | up                       | 17.56                   | 180                 |
| GRB10         | Homo sapiens growth factor receptor-bound protein 10 (GRB10), transcript variant 4, mRNA [NM_001001555]                                                | gene                | 2.55E-08 | 8.37E-13          | up                       | 16.75                   | 181                 |
| GZMA          | Homo sapiens granzyme A (granzyme 1, cytotoxic T-lymphocyte-associated serine esterase 3) (GZMA), mRNA [NM_006144]                                     | gene                | 1.23E-02 | 4.11E-07          | up                       | 34.41                   | 182                 |
| GZMB          | Homo sapiens granzyme B (granzyme 2, cytotoxic T-lymphocyte-associated serine esterase 1) (GZMB), mRNA [NM_004131]                                     | gene                | 1.20E-02 | 3.99E-07          | up                       | 16.90                   | 183                 |
| GZMH          | Homo sapiens granzyme H (cathepsin G-like 2, protein h-CCP) (GZMH), transcript variant 1, mRNA [NM_033423]                                             | gene                | 1.31E-02 | 4.35E-07          | up                       | 26.48                   | 184                 |
| GZMK          | Homo sapiens granzyme K (granzyme 3; tryptase II) (GZMK), mRNA [NM_002104]                                                                             | gene                | 4.85E-02 | 1.62E-06          | up                       | 20.57                   | 185                 |
| HCAR3         | Homo sapiens hydroxycarboxylic acid receptor 3 (HCAR3), mRNA [NM_006018]                                                                               | gene                | 9.94E-09 | 3.26E-13          | up                       | 521.29                  | 186                 |
| HCK           | Homo sapiens HCK proto-oncogene, Src family tyrosine kinase (HCK), transcript variant 1, mRNA [NM_002110]                                              | gene                | 1.35E-04 | 4.45E-09          | up                       | 12.86                   | 187                 |
| HDC           | Homo sapiens histidine decarboxylase (HDC), mRNA [NM_002112]                                                                                           | gene                | 5.92E-03 | 1.97E-07          | up                       | 9.62                    | 188                 |
| HIVEP3        | Homo sapiens human immunodeficiency virus type 1 enhancer binding protein 3 (HIVEP3), transcript variant 3, non-coding RNA [NR_038260]                 | gene                | 3.42E-03 | 1.14E-07          | up                       | 3.99                    | 189                 |
| HNMT          | Homo sapiens histamine N-methyltransferase (HNMT), transcript variant 2, mRNA [NM_001024074]                                                           | gene                | 5.18E-04 | 1.71E-08          | up                       | 8.28                    | 190                 |
| HP            | Homo sapiens haptoglobin (HP), transcript variant 1, mRNA [NM_005143]                                                                                  | gene                | 1.76E-03 | 5.84E-08          | up                       | 17.72                   | 191                 |
| HPSE          | Homo sapiens heparanase (HPSE), transcript variant 1, mRNA [NM_006665]                                                                                 | gene                | 1.49E-02 | 4.95E-07          | up                       | 12.75                   | 192                 |
| HS3ST3B1      | Homo sapiens heparan sulfate (glucosamine) 3-O-sulfotransferase 3B1 (HS3ST3B1), transcript variant 1, mRNA [NM_006041]                                 | gene                | 1.86E-08 | 6.10E-13          | up                       | 7.25                    | 193                 |
| ICAM1         | Homo sapiens intercellular adhesion molecule 1 (ICAM1), mRNA [NM_000201]                                                                               | gene                | 3.50E-04 | 1.16E-08          | up                       | 17.99                   | 194                 |
| ID2           | Homo sapiens inhibitor of DNA binding 2, dominant negative helix-loop-helix protein (ID2), mRNA [NM_002166]                                            | gene                | 1.70E-06 | 5.60E-11          | up                       | 25.85                   | 195                 |
| ID2           | Homo sapiens inhibitor of DNA binding 2, dominant negative helix-loop-helix protein (ID2), mRNA [NM_002166]                                            | gene                | 1.19E-03 | 3.96E-08          | up                       | 21.02                   | Not used            |
| IER3          | Homo sapiens immediate early response 3 (IER3), mRNA [NM_003897]                                                                                       | gene                | 4.57E-03 | 1.52E-07          | up                       | 20.40                   | 196                 |
| IER3          | Homo sapiens immediate early response 3 (IER3), mRNA [NM_003897]                                                                                       | gene                | 8.68E-04 | 2.87E-08          | up                       | 20.23                   | Not used            |
| IFI30         | Homo sapiens interferon, gamma-inducible protein 30 (IFI30), mRNA [NM_006332]                                                                          | gene                | 1.27E-02 | 4.22E-07          | up                       | 10.77                   | 197                 |
| IFIT1         | Homo sapiens interferon-induced protein with tetratricopeptide repeats 1 (IFIT1), transcript variant 1, mRNA [NM_001548]                               | gene                | 2.19E-02 | 7.30E-07          | up                       | 12.40                   | 198                 |
| IFITM2        | Homo sapiens interferon induced transmembrane protein 2 (IFITM2), mRNA [NM_006435]                                                                     | gene                | 3.33E-02 | 1.11E-06          | up                       | 5.37                    | 199                 |
| IFITM3        | Homo sapiens interferon induced transmembrane protein 3 (IFITM3), transcript variant 1, mRNA [NM_021034]                                               | gene                | 3.26E-02 | 1.09E-06          | up                       | 4.73                    | 200                 |
| IFNG          | Homo sapiens interferon, gamma (IFNG), mRNA [NM_000619]                                                                                                | gene                | 2.19E-07 | 7.21E-12          | up                       | 15.36                   | 201                 |
| IGFBP7        | Homo sapiens insulin-like growth factor binding protein 7 (IGFBP7), transcript variant 1, mRNA [NM_001553]                                             | gene                | 1.17E-03 | 3.86E-08          | up                       | 13.19                   | 202                 |
| IGSF6         | Homo sapiens immunoglobulin superfamily, member 6 (IGSF6), mRNA [NM_005849]                                                                            | gene                | 2.17E-02 | 7.23E-07          | up                       | 9.99                    | 203                 |
| IL13RA1       | Homo sapiens interleukin 13 receptor, alpha 1 (IL13RA1), mRNA [NM_001560]                                                                              | gene                | 3.22E-02 | 1.07E-06          | up                       | 8.23                    | 204                 |
| IL18R1        | Homo sapiens interleukin 18 receptor 1 (IL18R1), transcript variant 1, mRNA [NM_003855]                                                                | gene                | 3.59E-05 | 1.19E-09          | up                       | 12.00                   | 205                 |
| IL18R1        | Homo sapiens interleukin 18 receptor 1 (IL18R1), transcript variant 1, mRNA [NM_003855]                                                                | gene                | 1.22E-02 | 4.07E-07          | up                       | 7.72                    | Not used            |
| IL18R1        | Homo sapiens interleukin 18 receptor 1 (IL18R1), transcript variant 1, mRNA [NM_003855]                                                                | gene                | 1.04E-03 | 3.44E-08          | up                       | 4.58                    | Not used            |
| IL18RAP       | Homo sapiens interleukin 18 receptor accessory protein (IL18RAP), mRNA [NM_003853]                                                                     | gene                | 5.41E-05 | 1.79E-09          | up                       | 48.93                   | 206                 |
| IL18RAP       | Homo sapiens interleukin 18 receptor accessory protein (IL18RAP), mRNA [NM_003853]                                                                     | gene                | 7.33E-05 | 2.42E-09          | up                       | 6.27                    | Not used            |
| IL1B          | Homo sapiens interleukin 1, beta (IL1B), mRNA [NM_000576]                                                                                              | gene                | 4.45E-04 | 1.47E-08          | up                       | 49.88                   | 207                 |
| IL1R2         | Homo sapiens interleukin 1 receptor, type II (IL1R2), transcript variant 1, mRNA [NM_004633]                                                           | gene                | 1.24E-04 | 4.10E-09          | up                       | 21.32                   | 208                 |
| IL1RN         | Homo sapiens interleukin 1 receptor antagonist (IL1RN), transcript variant 4, mRNA [NM_173843]                                                         | gene                | 3.60E-09 | 1.18E-13          | up                       | 409.54                  | 209                 |
| IL1RN         | Homo sapiens interleukin 1 receptor antagonist (IL1RN), transcript variant 4, mRNA [NM_173843]                                                         | gene                | 4.56E-02 | 1.52E-06          | up                       | 4.07                    | Not used            |
| IL32          | Homo sapiens interleukin 32 (IL32), transcript variant 1, mRNA [NM_001012631]                                                                          | gene                | 2.02E-03 | 6.71E-08          | up                       | 15.08                   | 210                 |
| IL32          | Homo sapiens interleukin 32 (IL32), transcript variant 4, mRNA [NM_001012633]                                                                          | gene                | 9.37E-03 | 3.12E-07          | up                       | 3.49                    | Not used            |
| IL7R          | Homo sapiens interleukin 7 receptor (IL7R), transcript variant 1, mRNA [NM_002185]                                                                     | gene                | 5.89E-05 | 1.94E-09          | up                       | 47.60                   | 211                 |
| IRAK3         | Homo sapiens interleukin-1 receptor-associated kinase 3 (IRAK3), transcript variant 1, mRNA [NM_007199]                                                | gene                | 1.34E-06 | 4.42E-11          | up                       | 55.05                   | 212                 |
| IRG1          | Homo sapiens immunoresponsive 1 homolog (mouse) (IRG1), mRNA [NM_001258406]                                                                            | gene                | 1.08E-04 | 3.55E-09          | down                     | -2.66                   | 213                 |
| ITGA6         | Homo sapiens integrin, alpha 6 (ITGA6), transcript variant 2, mRNA [NM_000210]                                                                         | gene                | 1.68E-03 | 5.58E-08          | up                       | 7.06                    | 214                 |
| ITGB2         | Homo sapiens integrin, beta 2 (complement component 3 receptor 3 and 4 subunit) (ITGB2), transcript variant 1, mRNA [NM_000211]                        | gene                | 6.72E-03 | 2.23E-07          | up                       | 7.78                    | 215                 |
| ITK           | Homo sapiens IL2-inducible T-cell kinase (ITK), mRNA [NM_005546]                                                                                       | gene                | 9.26E-07 | 3.05E-11          | up                       | 29.03                   | 216                 |
| KCNJ15        | Homo sapiens potassium channel, inwardly rectifying subfamily J, member 15 (KCNJ15), transcript variant 1, mRNA [NM_170736]                            | gene                | 1.27E-02 | 4.22E-07          | up                       | 10.44                   | 217                 |
| KCTD12        | Homo sapiens potassium channel tetramerization domain containing 12 (KCTD12), mRNA [NM_138444]                                                         | gene                | 2.76E-02 | 9.15E-08          | up                       | 21.20                   | 218                 |
| KIAA0513      | Homo sapiens KIAA0513 (KIAA0513), transcript variant 2, mRNA [NM_014732]                                                                               | gene                | 5.86E-04 | 1.94E-08          | up                       | 6.01                    | 219                 |
| KIAA1324      | Homo sapiens KIAA1324 (KIAA1324), transcript variant 1, mRNA [NM_020775]                                                                               | gene                | 2.76E-02 | 9.19E-07          | up                       | 7.32                    | 220                 |
| KIR2DS2       | Homo sapiens killer cell immunoglobulin-like receptor, two domains, short cytoplasmic tail, 2 (KIR2DS2), transcript variant 1, mRNA [NM_012312]        | gene                | 8.08E-04 | 2.68E-08          | up                       | 13.30                   | 221                 |
| KIR3DL2       | Homo sapiens killer cell immunoglobulin-like receptor, three domains, long cytoplasmic tail, 2 (KIR3DL2), transcript variant 1, mRNA [NM_006737]       | gene                | 1.22E-02 | 4.05E-07          | up                       | 5.24                    | 222                 |
| KLF17         | Homo sapiens kruppel-like factor 17 (KLF17), mRNA [NM_173484]                                                                                          | gene                | 3.77E-02 | 1.26E-06          | down                     | -1.79                   | 223                 |
| KLRB1         | Homo sapiens killer cell lectin-like receptor subfamily B, member 1 (KLRB1), mRNA [NM_002258]                                                          | gene                | 4.45E-04 | 1.47E-08          | up                       | 26.01                   | 224                 |
| KLRC1         | Homo sapiens killer cell lectin-like receptor subfamily C, member 1 (KLRC1), transcript variant 1, mRNA [NM_002259]                                    | gene                | 1.28E-03 | 4.23E-08          | up                       | 11.26                   | 225                 |
| KLRD1         | Homo sapiens killer cell lectin-like receptor subfamily D, member 1 (KLRD1), transcript variant 1, mRNA [NM_002262]                                    | gene                | 9.34E-03 | 3.11E-07          | up                       | 16.82                   | 226                 |
| KLRD1         | Homo sapiens killer cell lectin-like receptor subfamily D, member 1 (KLRD1), transcript variant 1, mRNA [NM_002262]                                    | gene                | 9.45E-08 | 3.10E-12          | up                       | 16.60                   | Not used            |
| KLRK1         | Homo sapiens killer cell lectin-like receptor subfamily K, member 1 (KLRK1), mRNA [NM_007360]                                                          | gene                | 5.00E-04 | 1.65E-08          | up                       | 7.73                    | 227                 |
| KRBA2         | Homo sapiens KRAB-A domain containing 2 (KRBA2), mRNA [NM_213597]                                                                                      | gene                | 2.53E-03 | 8.40E-08          | down                     | -2.05                   | 228                 |
| KREMEN1       | Homo sapiens kringel containing transmembrane protein 1 (KREMEN1), transcript variant 3, mRNA [NM_001039570]                                           | gene                | 5.00E-05 | 1.65E-09          | up                       | 18.18                   | 229                 |
| KRT23         | Homo sapiens keratin 23, type I (KRT23), transcript variant 1, mRNA [NM_015515]                                                                        | gene                | 2.76E-03 | 9.14E-08          | up                       | 30.43                   | 230                 |
| KRT8P41       | Homo sapiens keratin 8 pseudogene 41 (KRT8P41), non-coding RNA [NR_027713]                                                                             | gene                | 2.93E-03 | 9.73E-08          | down                     | -2.00                   | 231                 |
| KRTAP3-1      | Homo sapiens keratin associated protein 3-1 (KRTAP3-1), mRNA [NM_031958]                                                                               | gene                | 2.11E-02 | 7.05E-07          | down                     | -2.42                   | 232                 |
| LACTB         | Homo sapiens lactamase, beta (LACTB), transcript variant 2, mRNA [NM_171846]                                                                           | gene                | 3.33E-02 | 1.11E-06          | up                       | 2.79                    | 233                 |
| LCN2          | Homo sapiens lipocalin 2 (LCN2), mRNA [NM_005564]                                                                                                      | gene                | 7.14E-07 | 2.35E-11          | up                       | 99.27                   | 234                 |
| LDLR          | Homo sapiens low density lipoprotein receptor (LDLR), transcript variant 1, mRNA [NM_000527]                                                           | gene                | 2.50E-07 | 8.22E-12          | up                       | 23.96                   | 235                 |
| LGALS12       | Homo sapiens lectin, galactoside-binding, soluble, 12 (LGALS12), transcript variant 2, mRNA [NM_033101]                                                | gene                | 5.28E-03 | 1.75E-07          | up                       | 3.11                    | 236                 |
| LGALS3        | Homo sapiens lectin, galactoside-binding, soluble, 3 (LGALS3), transcript variant 1, mRNA [NM_002306]                                                  | gene                | 1.17E-04 | 3.87E-09          | up                       | 24.55                   | 237                 |
| LILRA2        | Homo sapiens leukocyte immunoglobulin-like receptor, subfamily A (with TM domain), member 2 (LILRA2), transcript variant 2, mRNA [NM_006866]           | gene                | 4.04E-02 | 1.35E-06          | up                       | 7.03                    | 238                 |
| LILRA5        | Homo sapiens leukocyte immunoglobulin-like receptor, subfamily A (with TM domain), member 5 (LILRA5), transcript variant 3, mRNA [NM_181879]           | gene                | 1.82E-06 | 6.01E-11          | up                       | 18.69                   | 239                 |
| LILRA6        | Homo sapiens leukocyte immunoglobulin-like receptor, subfamily A (with TM domain), member 6 (LILRA6), transcript variant 2, non-coding RNA [NR_104098] | gene                | 2.76E-11 | 9.06E-16          | up                       | 123.49                  | 240                 |
| LILRB3        | Homo sapiens leukocyte immunoglobulin-like receptor, subfamily B (with TM and ITIM domains), member 3 (LILRB3), transcript variant 2, mRNA [NM_006864] | gene                | 3.91E-05 | 1.29E-09          | up                       | 52.25                   | 241                 |
| LIMK2         | Homo sapiens LIM domain kinase 2 (LIMK2), transcript variant 2b, mRNA [NM_016733]                                                                      | gene                | 5.71E-07 | 1.88E-11          | up                       | 8.14                    | 242                 |
| LIMK2         | Homo sapiens LIM domain kinase 2 (LIMK2), transcript variant 1, mRNA [NM_001031801]                                                                    | gene                | 1.24E-04 | 4.10E-09          | up                       | 4.44                    | Not used            |
| LIN7A         | Homo sapiens lin-7 homolog A (C. elegans) (LIN7A), mRNA [NM_004664]                                                                                    | gene                | 2.72E-11 | 8.92E-16          | up                       | 60.80                   | 243                 |
| LINC00243     | Homo sapiens cDNA FLJ40693 fis, clone THYMJ2025042, [AK098012]                                                                                         | miscellaneous       | 9.78E-04 | 3.24E-08          | down                     | -2.69                   | Not used            |
| LINC00472     | Homo sapiens long intergenic non-protein coding RNA 472 (LINC00472), transcript variant 4, long non-coding RNA [NR_121614]                             | lncRNA              | 3.56E-03 | 1.18E-07          | down                     | -2.47                   | Not used            |
| LINC00892     | Homo sapiens long intergenic non-protein coding RNA 892 (LINC00892), transcript variant 1, long non-coding RNA [NR_038461]                             | lncRNA              | 6.19E-04 | 2.05E-08          | up                       | 6.06                    | Not used            |
| LINC00937     | Homo sapiens long intergenic non-protein coding RNA 937 (LINC00937), long non-coding RNA [NR_024420]                                                   | lncRNA              | 6.42E-04 | 2.12E-08          | up                       | 20.67                   | Not used            |
| LINC00937     | Homo sapiens long intergenic non-protein coding RNA 937 (LINC00937), long non-coding RNA [NR_024420]                                                   | lncRNA              | 2.75E-05 | 9.05E-10          | up                       | 19.86                   | Not used            |
| LINC01272     | Homo sapiens long intergenic non-protein coding RNA 1272 (LINC01272), mRNA [NM_001278655]                                                              | long intergenic RNA | 3.21E-02 | 1.07E-06          | up                       | 5.78                    | Not used            |
| LINC01550     | Homo sapiens long intergenic non-protein coding RNA 1550 (LINC01550), long non-coding RNA [NR_015430]                                                  | lncRNA              | 1.34E-04 | 4.41E-09          | up                       | 5.27                    | Not used            |
| LMO2          | Homo sapiens LIM domain only 2 (rhombotin-like 1) (LMO2), transcript variant 1, mRNA [NM_005574]                                                       | gene                | 1.44E-02 | 4.80E-07          | up                       | 16.74                   | 244                 |
| lnc-ALPL-1    | LNCipedia lincRNA (lnc-ALPL-1), lincRNA [lnc-ALPL-1:1]                                                                                                 | lncRNA              | 5.54E-04 | 1.83E-08          | up                       | 9.12                    | Not used            |
| lnc-ARRDC3-1  | LNCipedia lincRNA (lnc-ARRDC3-1), lincRNA [lnc-ARRDC3-1:6]                                                                                             | lncRNA              | 1.40E-04 | 4.61E-09          | up                       | 55.85                   | Not used            |
| lnc-ARRDC3-1  | LNCipedia lincRNA (lnc-ARRDC3-1), lincRNA [lnc-ARRDC3-1:1]                                                                                             | lncRNA              | 2.43E-04 | 8.05E-09          | up                       | 53.89                   | Not used            |
| lnc-ARRDC3-1  | LNCipedia lincRNA (lnc-ARRDC3-1), lincRNA [lnc-ARRDC3-1:14]                                                                                            | lncRNA              | 3.51E-02 | 1.17E-06          | up                       | 12.48                   | Not used            |
| lnc-ATP6V1D-1 | LNCipedia lincRNA (lnc-ATP6V1D-1), lincRNA [lnc-ATP6V1D-1:1]                                                                                           | lncRNA              | 3.03E-03 | 1.01E-07          | down                     | -3.02                   | Not used            |
| lnc-CHL1-1    | LNCipedia lincRNA (lnc-CHL1-1), lincRNA [lnc-CHL1-1:1]                                                                                                 | lncRNA              | 8.37E-04 | 2.77E-08          | down                     | -2.47                   | Not used            |
| lnc-GPCPD1-1  | ALU1_HUMAN (P39188) Alu subfamily J sequence contamination warning entry, partial (11%) [THC2678782]                                                   | miscellaneous       | 4.12E-02 | 1.38E-06          | down                     | -2.60                   | Not used            |
| lnc-HRCT1-3   | LNCipedia lincRNA (lnc-HRCT1-3), lincRNA [lnc-HRCT1-3:3]                                                                                               | lncRNA              | 3.68E-02 | 1.23E-06          | down                     | -3.80                   | Not used            |
| lnc-IGSF3-1   | CD014608 Human CD34+ ESTs from primary hematopoietic stem-progenitor cells Homo sapiens cDNA 3', mRNA sequence [G01S0158]                              | miscellaneous       | 1.12E-04 | 3.70E-09          | up                       | 6.13                    | Not used            |
| lnc-IL16-2    | LNCipedia lincRNA (lnc-IL16-2), lincRNA [lnc-IL16-2:1]                                                                                                 | lncRNA              | 2.10E-02 | 6.99E-07          | down                     | -2.83                   | Not used            |
| lnc-IL4R-1    | LNCipedia lincRNA (lnc-IL4R-1), lincRNA [lnc-IL4R-1:1]                                                                                                 | lncRNA              | 6.76E-04 | 2.24E-08          | down                     | -2.09                   | Not used            |
| lnc-KY-1      | LNCipedia lincRNA (lnc-KY-1), lincRNA [lnc-KY-1:1]                                                                                                     | lncRNA              | 4.80E-03 | 1.59E-07          | up                       | 5.07                    | Not used            |
| lnc-PDE6B-1   | LNCipedia lincRNA (lnc-PDE6B-1), lincRNA [lnc-PDE6B-1:9]                                                                                               | lncRNA              | 4.00E-02 | 1.34E-06          | down                     | -2.30                   | Not used            |
| lnc-PPP1R26-2 | LNCipedia lincRNA (lnc-PPP1R26-2), lincRNA [lnc-PPP1R26-2:1]                                                                                           | lncRNA              | 3.61E-02 | 1.20E-06          | down                     | -1.75                   | Not used            |
| lnc-RAB28-4   | LNCipedia lincRNA (lnc-RAB28-4), lincRNA [lnc-RAB28-4:1]                                                                                               | lncRNA              | 2.40E-02 | 8.02E-07          | down                     | -1.76                   | Not used            |
| lnc-SHCBP1L-1 | Homo sapiens cDNA FLJ10580 fis, clone NT2RP2003533, [AK001442]                                                                                         | miscellaneous       | 4.51E-02 | 1.51E-06          | down                     | -1.93                   | Not used            |
| lnc-TM4SF4-2  | Homo sapiens cDNA, FLJ99482, [AK309441]                                                                                                                | miscellaneous       | 1.97E-02 | 6.56E-07          | up                       | 3.32                    | Not used            |
| lnc-VPS18-1   | LNCipedia lincRNA (lnc-VPS18-1), lincRNA [lnc-VPS18-1:2]                                                                                               | lncRNA              | 3.43E-02 | 1.15E-06          | down                     | -1.93                   | Not used            |
|               |                                                                                                                                                        |                     |          |                   |                          |                         |                     |

| Gene Symbol  | Description                                                                                                                                          | Feature Type          | p-value  | Corrected p-value | Regulation in NOTCH1-mut | Fold change (Mut vs WT) | Position in Heatmap |
|--------------|------------------------------------------------------------------------------------------------------------------------------------------------------|-----------------------|----------|-------------------|--------------------------|-------------------------|---------------------|
| LOC101929450 | Homo sapiens uncharacterized LOC101929450 (LOC101929450), transcript variant 2, long non-coding RNA [NR_125815]                                      | ncRNA                 | 9.33E-03 | 3.10E-07          | down                     | -1.85                   | Not used            |
| LOC101929531 | PREDICTED: Homo sapiens uncharacterized LOC101929531 (LOC101929531), ncRNA [XR_241262]                                                               | ncRNA                 | 3.20E-08 | 1.05E-12          | up                       | 16.51                   | Not used            |
| LOC101929634 | PREDICTED: Homo sapiens uncharacterized LOC101929634 (LOC101929634), misc_RNA [XR_245823]                                                            | uncharacterized locus | 7.66E-03 | 2.55E-07          | down                     | -1.78                   | Not used            |
| LOC102724491 | PREDICTED: Homo sapiens uncharacterized LOC102724491 (LOC102724491), ncRNA [XR_433775]                                                               | ncRNA                 | 8.10E-03 | 2.69E-07          | down                     | -1.93                   | Not used            |
| LOC254896    | Homo sapiens uncharacterized LOC254896 (LOC254896), long non-coding RNA [NR_046173]                                                                  | ncRNA                 | 1.86E-03 | 6.16E-08          | up                       | 11.50                   | Not used            |
| LOC424132    | Homo sapiens golgin A6 family-like 1 pseudogene (LOC424132), non-coding RNA [NR_033906]                                                              | pseudogene            | 2.31E-02 | 7.69E-07          | down                     | -1.90                   | Not used            |
| LOC729609    | Homo sapiens uncharacterized LOC729609 (LOC729609), long non-coding RNA [NR_024440]                                                                  | ncRNA                 | 4.73E-04 | 1.57E-08          | down                     | -1.88                   | Not used            |
| LPAR6        | Homo sapiens lysophosphatidic acid receptor 6 (LPAR6), transcript variant 1, mRNA [NM_005767]                                                        | gene                  | 1.32E-02 | 4.40E-07          | up                       | 13.76                   | 245                 |
| LPAT32       | Homo sapiens lysophosphatidylcholine acyltransferase 2 (LPAT2), mRNA [NM_017839]                                                                     | gene                  | 3.89E-03 | 1.29E-07          | up                       | 6.57                    | 246                 |
| LRG1         | Homo sapiens leucine-rich alpha-2-glycoprotein 1 (LRG1), mRNA [NM_052972]                                                                            | gene                  | 3.58E-05 | 1.18E-09          | up                       | 18.55                   | 247                 |
| LRRC25       | Homo sapiens leucine rich repeat containing 25 (LRRC25), mRNA [NM_145256]                                                                            | gene                  | 1.79E-06 | 5.89E-11          | up                       | 20.87                   | 248                 |
| LRRC55       | Homo sapiens leucine rich repeat containing 55 (LRRC55), mRNA [NM_001005210]                                                                         | gene                  | 1.85E-02 | 6.18E-07          | up                       | 10.67                   | 249                 |
| LST1         | Homo sapiens leukocyte specific transcript 1 (LST1), transcript variant 1, mRNA [NM_007161]                                                          | gene                  | 3.55E-06 | 1.17E-10          | up                       | 16.17                   | 250                 |
| LTF          | Homo sapiens lactotransferrin (LTF), transcript variant 1, mRNA [NM_002343]                                                                          | gene                  | 6.00E-08 | 1.97E-12          | up                       | 260.07                  | 251                 |
| LUCAT1       | Homo sapiens lung cancer associated transcript 1 (non-protein coding) (LUCAT1), transcript variant 1, long non-coding RNA [NR_103548]                | gene                  | 1.98E-02 | 6.59E-07          | up                       | 16.46                   | 252                 |
| LYAR         | Homo sapiens Ly1 antibody reactive (LYAR), transcript variant 1, mRNA [NM_017816]                                                                    | gene                  | 2.77E-03 | 9.20E-08          | up                       | 3.55                    | 253                 |
| MAF          | Homo sapiens v-maf avian musculoaponeurotic fibrosarcoma oncogene homolog (MAF), transcript variant 2, mRNA [NM_001031804]                           | gene                  | 1.39E-05 | 4.59E-10          | up                       | 7.81                    | 254                 |
| MAFB         | Homo sapiens v-maf avian musculoaponeurotic fibrosarcoma oncogene homolog B (MAFB), mRNA [NM_005461]                                                 | gene                  | 6.69E-06 | 2.20E-10          | up                       | 230.52                  | 255                 |
| MAL          | Homo sapiens mal, T-cell differentiation protein (MAL), transcript variant 4, mRNA [NM_002371]                                                       | gene                  | 4.46E-07 | 2.13E-11          | up                       | 45.43                   | 256                 |
| MAR1         | Homo sapiens mitochondrial amidoxime reducing component 1 (MAR1), mRNA [NM_022746]                                                                   | gene                  | 8.59E-05 | 2.84E-09          | up                       | 7.92                    | 257                 |
| MARCO        | Homo sapiens macrophage receptor with collagenous structure (MARCO), mRNA [NM_006770]                                                                | gene                  | 3.44E-02 | 1.15E-06          | up                       | 11.97                   | 258                 |
| MATK         | Homo sapiens megakaryocyte-associated tyrosine kinase (MATK), transcript variant 1, mRNA [NM_139355]                                                 | gene                  | 2.01E-02 | 6.70E-07          | up                       | 6.40                    | 259                 |
| MBOAT7       | Homo sapiens membrane bound O-acyltransferase domain containing 7 (MBOAT7), transcript variant 4, mRNA [NM_001146082]                                | gene                  | 7.15E-06 | 2.36E-10          | up                       | 9.56                    | 260                 |
| MCCEMP1      | Homo sapiens mast cell-expressed membrane protein 1 (MCCEMP1), mRNA [NM_174918]                                                                      | gene                  | 1.79E-07 | 5.89E-12          | up                       | 33.65                   | 261                 |
| MGAM         | Homo sapiens maltase-glucoamylase (alpha-glucosidase) (MGAM), mRNA [NM_004668]                                                                       | gene                  | 1.22E-03 | 4.04E-08          | up                       | 13.56                   | 262                 |
| MGAT4A       | Homo sapiens mannosyl (alpha-1,3-)-glycoprotein beta-1,4-N-acetylglucosaminyltransferase, isozyme A (MGAT4A), transcript variant 1, mRNA [NM_012214] | gene                  | 6.91E-04 | 2.29E-08          | up                       | 21.96                   | 263                 |
| MGST1        | Homo sapiens microsomal glutathione S-transferase 1 (MGST1), transcript variant 3, mRNA [NM_145791]                                                  | gene                  | 8.01E-03 | 2.66E-07          | up                       | 13.12                   | 264                 |
| MIAT         | Homo sapiens myocardial infarction associated transcript (non-protein coding) (MIAT), transcript variant 1, long non-coding RNA [NR_003491]          | gene                  | 2.47E-03 | 8.20E-08          | up                       | 14.64                   | 265                 |
| MIAT         | Homo sapiens myocardial infarction associated transcript (non-protein coding) (MIAT), transcript variant 1, long non-coding RNA [NR_003491]          | ncRNA                 | 4.77E-03 | 1.59E-07          | up                       | 12.31                   | Not used            |
| MIAT         | Homo sapiens myocardial infarction associated transcript (non-protein coding) (MIAT), transcript variant 1, long non-coding RNA [NR_003491]          | ncRNA                 | 8.31E-03 | 2.76E-07          | up                       | 10.64                   | Not used            |
| MIAT         | Homo sapiens myocardial infarction associated transcript (non-protein coding) (MIAT), transcript variant 1, long non-coding RNA [NR_003491]          | ncRNA                 | 1.82E-03 | 6.02E-08          | up                       | 5.36                    | Not used            |
| MIAT         | Homo sapiens myocardial infarction associated transcript (non-protein coding) (MIAT), transcript variant 1, long non-coding RNA [NR_003491]          | ncRNA                 | 4.93E-02 | 1.65E-06          | up                       | 3.95                    | Not used            |
| MICALCL      | Homo sapiens MICAL C-terminal like (MICALCL), mRNA [NM_032867]                                                                                       | gene                  | 8.77E-05 | 2.90E-09          | up                       | 6.78                    | 266                 |
| MINOS1-NBL1  | Homo sapiens MINOS1-NBL1 readthrough (MINOS1-NBL1), transcript variant 1, mRNA [NM_001204088]                                                        | gene                  | 6.32E-03 | 2.10E-07          | up                       | 4.34                    | 267                 |
| MCL1         | Homo sapiens megalencephalic leukoencephalopathy with subcortical cysts 1 (MCL1), transcript variant 1, mRNA [NM_015166]                             | gene                  | 2.04E-02 | 6.79E-07          | up                       | 7.71                    | 268                 |
| MME          | Homo sapiens membrane metallo-endopeptidase (MME), transcript variant 2b, mRNA [NM_007289]                                                           | gene                  | 2.60E-03 | 8.62E-08          | up                       | 18.12                   | 269                 |
| MME          | Homo sapiens membrane metallo-endopeptidase (MME), transcript variant 2b, mRNA [NM_007289]                                                           | gene                  | 1.83E-04 | 6.03E-09          | up                       | 11.98                   | Not used            |
| MMP25        | Homo sapiens matrix metalloproteinase 25 (MMP25), mRNA [NM_022468]                                                                                   | gene                  | 4.95E-07 | 1.63E-11          | up                       | 45.40                   | 270                 |
| MMP9         | Homo sapiens matrix metalloproteinase 9 (gelatinase B, 92kDa gelatinase, 92kDa type IV collagenase) (MMP9), mRNA [NM_004994]                         | gene                  | 1.36E-06 | 4.47E-11          | up                       | 36.02                   | 271                 |
| MPO          | Homo sapiens myeloperoxidase (MPO), mRNA [NM_000250]                                                                                                 | gene                  | 2.08E-02 | 6.94E-07          | up                       | 21.97                   | 272                 |
| MPP1         | Homo sapiens membrane protein, palmitoylated 1, 55kDa (MPP1), transcript variant 1, mRNA [NM_002436]                                                 | gene                  | 1.28E-03 | 4.22E-08          | up                       | 11.45                   | 273                 |
| MPP1         | Homo sapiens membrane protein, palmitoylated 1, 55kDa (MPP1), transcript variant 3, mRNA [NM_001166461]                                              | gene                  | 2.02E-04 | 6.67E-09          | up                       | 10.97                   | Not used            |
| MT2A         | Homo sapiens metallothionein 2A (MT2A), mRNA [NM_005953]                                                                                             | gene                  | 8.13E-03 | 2.70E-07          | up                       | 9.04                    | 274                 |
| MXD1         | Homo sapiens MAX dimerization protein 1 (MXD1), transcript variant 1, mRNA [NM_002357]                                                               | gene                  | 2.66E-03 | 8.81E-08          | up                       | 4.52                    | 275                 |
| MXD1         | Homo sapiens MAX dimerization protein 1 (MXD1), transcript variant 1, mRNA [NM_002357]                                                               | gene                  | 3.98E-02 | 1.33E-06          | up                       | 4.25                    | Not used            |
| NACC2        | Homo sapiens NACC family member 2, BEN and BTB (POZ) domain containing (NACC2), mRNA [NM_144653]                                                     | gene                  | 8.69E-06 | 2.86E-10          | up                       | 24.29                   | 276                 |
| NAMPT        | Homo sapiens nicotinamide phosphoribosyltransferase (NAMPT), mRNA [NM_005746]                                                                        | gene                  | 2.01E-02 | 6.70E-07          | up                       | 7.66                    | 277                 |
| NAMPT        | Homo sapiens nicotinamide phosphoribosyltransferase (NAMPT), mRNA [NM_005746]                                                                        | gene                  | 8.54E-03 | 2.84E-07          | up                       | 5.44                    | Not used            |
| NANOS2       | Homo sapiens nanos homolog 2 (Drosophila) (NANOS2), mRNA [NM_001029861]                                                                              | gene                  | 3.90E-02 | 1.30E-06          | down                     | -3.27                   | 278                 |
| NBAT1        | Homo sapiens neuroblastoma associated transcript 1 (NBAT1), long non-coding RNA [NR_034143]                                                          | gene                  | 4.93E-03 | 1.64E-07          | down                     | -2.42                   | 279                 |
| NEFL         | Homo sapiens neurofilament, light polypeptide (NEFL), mRNA [NM_006158]                                                                               | gene                  | 2.18E-02 | 7.28E-07          | up                       | 4.02                    | 280                 |
| NELL2        | Homo sapiens NEL-like 2 (chicken) (NELL2), transcript variant 2, mRNA [NM_006159]                                                                    | gene                  | 7.59E-07 | 2.50E-11          | up                       | 19.82                   | 281                 |
| NFAM1        | Homo sapiens NFAT activating protein with ITAM motif 1 (NFAM1), mRNA [NM_145912]                                                                     | gene                  | 1.56E-10 | 5.13E-15          | up                       | 98.89                   | 282                 |
| NFE2         | Homo sapiens nuclear factor, erythroid 2 (NFE2), transcript variant 1, mRNA [NM_006163]                                                              | gene                  | 5.45E-06 | 1.79E-10          | up                       | 42.95                   | 283                 |
| NFIL3        | Homo sapiens nuclear factor, interleukin 3 regulated (NFIL3), transcript variant 3, mRNA [NM_005384]                                                 | gene                  | 3.68E-08 | 1.21E-12          | up                       | 18.53                   | 284                 |
| NINJ1        | Homo sapiens ninjurin 1 (NINJ1), mRNA [NM_004148]                                                                                                    | gene                  | 1.27E-02 | 4.21E-07          | up                       | 18.11                   | 285                 |
| NGK7         | Homo sapiens natural killer cell granule protein 7 (NGK7), mRNA [NM_005601]                                                                          | gene                  | 3.72E-03 | 1.24E-07          | up                       | 23.84                   | 286                 |
| NLRP12       | Homo sapiens NLR family, pyrin domain containing 12 (NLRP12), transcript variant 3, mRNA [NM_001277126]                                              | gene                  | 1.59E-03 | 5.28E-08          | up                       | 14.40                   | 287                 |
| NLRP3        | Homo sapiens NLR family, pyrin domain containing 3 (NLRP3), transcript variant 3, mRNA [NM_001079821]                                                | gene                  | 3.42E-05 | 1.13E-09          | up                       | 29.07                   | 288                 |
| NLRP3        | Homo sapiens NLR family, pyrin domain containing 3 (NLRP3), transcript variant 6, mRNA [NM_001243133]                                                | gene                  | 8.06E-07 | 2.65E-11          | up                       | 21.58                   | Not used            |
| NME8         | Homo sapiens NME/NUM2 family member 8 (NME8), mRNA [NM_016616]                                                                                       | gene                  | 6.38E-04 | 2.11E-08          | up                       | 16.02                   | 289                 |
| NPC2         | Homo sapiens Niemann-Pick disease, type C2 (NPC2), mRNA [NM_006432]                                                                                  | gene                  | 5.72E-03 | 1.90E-07          | up                       | 1.90                    | 290                 |
| NPL          | Homo sapiens N-acetylneuraminate pyruvate lyase (dihydrodipicolinate synthase) (NPL), transcript variant 2, mRNA [NM_001200050]                      | gene                  | 5.87E-03 | 1.95E-07          | up                       | 7.81                    | 291                 |
| NPL          | N-acetylneuraminate pyruvate lyase (dihydrodipicolinate synthase) [Source:HGNC Symbol;Acc:HGNC:16781] [ENST00000463899]                              | gene                  | 1.79E-03 | 5.94E-08          | down                     | -2.00                   | Not used            |
| NR6A1        | Homo sapiens nuclear receptor subfamily 6, group A, member 1 (NR6A1), transcript variant 1, mRNA [NM_033334]                                         | gene                  | 9.01E-03 | 3.00E-07          | up                       | 11.61                   | 292                 |
| NUAK1        | Homo sapiens NUAK family, SNF1-like kinase, 1 (NUAK1), mRNA [NM_014840]                                                                              | gene                  | 4.05E-02 | 1.35E-06          | up                       | 5.24                    | 293                 |
| NUCB2        | Homo sapiens nucleobindin 2 (NUCB2), mRNA [NM_005013]                                                                                                | gene                  | 6.58E-03 | 2.18E-07          | up                       | 5.36                    | 294                 |
| OASL         | Homo sapiens 2'-5'-oligoadenylate synthetase-like (OASL), transcript variant 1, mRNA [NM_003733]                                                     | gene                  | 1.39E-02 | 4.64E-07          | up                       | 9.81                    | 295                 |
| OGFR         | Homo sapiens opioid growth factor receptor (OGFR), mRNA [NM_007346]                                                                                  | gene                  | 7.34E-03 | 2.44E-07          | down                     | -1.79                   | 296                 |
| OLFM2        | olfactomedin 2 [Source:HGNC Symbol;Acc:HGNC:17189] [ENST00000264833]                                                                                 | gene                  | 4.73E-02 | 1.58E-06          | down                     | -2.31                   | 297                 |
| OLIG1        | Homo sapiens oligodendrocyte transcription factor 1 (OLIG1), mRNA [NM_138983]                                                                        | gene                  | 7.25E-07 | 2.38E-11          | up                       | 33.26                   | 298                 |
| ONECUT2      | Homo sapiens one cut homeobox 2 (ONECUT2), mRNA [NM_004852]                                                                                          | gene                  | 1.84E-02 | 6.12E-07          | down                     | -2.94                   | 299                 |
| OR116        | Homo sapiens olfactory receptor, family 1, subfamily L, member 6 (OR116), mRNA [NM_001004453]                                                        | gene                  | 3.37E-03 | 1.12E-07          | down                     | -1.72                   | 300                 |
| ORM2         | Homo sapiens orosomucoid 2 (ORM2), mRNA [NM_006068]                                                                                                  | gene                  | 4.30E-02 | 1.44E-06          | up                       | 6.40                    | 301                 |
| OSBP1LA      | Homo sapiens oxysterol binding protein-like 1A (OSBP1LA), transcript variant 2, mRNA [NM_080597]                                                     | gene                  | 1.66E-03 | 5.49E-08          | up                       | 4.62                    | 302                 |
| OSM          | Homo sapiens oncostatin M (OSM), mRNA [NM_020530]                                                                                                    | gene                  | 1.88E-04 | 6.22E-09          | up                       | 14.44                   | 303                 |
| P2RY13       | Homo sapiens purinergic receptor P2Y, G-protein coupled, 13 (P2RY13), mRNA [NM_176894]                                                               | gene                  | 4.29E-07 | 1.41E-11          | up                       | 18.19                   | 304                 |
| P2RY2        | Homo sapiens purinergic receptor P2Y, G-protein coupled, 2 (P2RY2), transcript variant 1, mRNA [NM_176072]                                           | gene                  | 6.95E-05 | 2.29E-09          | up                       | 23.39                   | 305                 |
| PADI2        | Homo sapiens peptidyl arginine deiminase, type II (PADI2), mRNA [NM_007365]                                                                          | gene                  | 1.66E-03 | 5.51E-08          | up                       | 11.81                   | 306                 |
| PAG1         | Homo sapiens phosphoprotein membrane anchor with glycosphingolipid microdomains 1 (PAG1), mRNA [NM_018440]                                           | gene                  | 1.61E-07 | 5.29E-12          | up                       | 25.43                   | 307                 |
| PAG1         | Homo sapiens phosphoprotein membrane anchor with glycosphingolipid microdomains 1 (PAG1), mRNA [NM_018440]                                           | gene                  | 9.13E-05 | 3.01E-09          | up                       | 13.73                   | Not used            |
| PAM          | Homo sapiens peptidylglycine alpha-amidating monooxygenase (PAM), transcript variant 1, mRNA [NM_000919]                                             | gene                  | 1.97E-07 | 6.48E-12          | up                       | 4.87                    | 308                 |
| PCED1B-AS1   | Homo sapiens PCED1B antisense RNA 1 (PCED1B-AS1), long non-coding RNA [NR_026544]                                                                    | ncRNA                 | 5.91E-03 | 1.95E-07          | down                     | -2.67                   | Not used            |
| PCNXL4       | Homo sapiens cDNA FLJ38170 fis, clone FCBBF1000024. [AK095489]                                                                                       | gene                  | 1.64E-03 | 5.42E-08          | down                     | -2.14                   | 309                 |
| PCSK5        | Homo sapiens proprotein convertase subtilisin/kexin type 5 (PCSK5), transcript variant 2, mRNA [NM_006200]                                           | gene                  | 3.93E-08 | 1.29E-12          | up                       | 14.62                   | 310                 |
| PDE4D        | Homo sapiens phosphodiesterase 4D, cAMP-specific (PDE4D), transcript variant 3, mRNA [NM_001165899]                                                  | gene                  | 5.68E-06 | 1.87E-10          | up                       | 11.91                   | 311                 |
| PFKFB3       | Homo sapiens 6-phosphofructo-2-kinase/fructose-2,6-bisphosphatase 3 (PFKFB3), transcript variant 1, mRNA [NM_004566]                                 | gene                  | 6.91E-08 | 2.27E-12          | up                       | 12.25                   | 312                 |
| PFKFB3       | Homo sapiens 6-phosphofructo-2-kinase/fructose-2,6-bisphosphatase 3 (PFKFB3), transcript variant 1, mRNA [NM_004566]                                 | gene                  | 4.04E-02 | 1.35E-06          | up                       | 7.35                    | Not used            |
| PFKFB4       | Homo sapiens 6-phosphofructo-2-kinase/fructose-2,6-bisphosphatase 4 (PFKFB4), mRNA [NM_004567]                                                       | gene                  | 3.19E-03 | 1.06E-07          | up                       | 5.22                    | 313                 |
| PGLYRP1      | Homo sapiens peptidoglycan recognition protein 1 (PGLYRP1), mRNA [NM_005091]                                                                         | gene                  | 1.50E-06 | 9.58E-11          | up                       | 73.68                   | 314                 |
| PI3          | Homo sapiens peptidase inhibitor 3, skin-derived (PI3), mRNA [NM_002638]                                                                             | gene                  | 5.00E-03 | 1.66E-07          | up                       | 16.29                   | 315                 |
| PI4KA        | Homo sapiens phosphatidylinositol 4-kinase, catalytic, alpha (PI4KA), mRNA [NM_058004]                                                               | gene                  | 3.50E-02 | 1.17E-06          | down                     | -1.72                   | 316                 |
| PLAUR        | Homo sapiens plasminogen activator, urokinase receptor (PLAUR), transcript variant 3, mRNA [NM_001005377]                                            | gene                  | 1.33E-06 | 4.36E-11          | up                       | 68.44                   | 317                 |
| PLEKHG3      | Homo sapiens pleckstrin homology domain containing, family G (with RhoGef domain) member 3 (PLEKHG3), mRNA [NM_015549]                               | gene                  | 2.04E-07 | 6.72E-12          | up                       | 46.38                   | 318                 |
| PLEKHG3      | Homo sapiens pleckstrin homology domain containing, family G (with RhoGef domain) member 3 (PLEKHG3), mRNA [NM_015549]                               | gene                  | 2.92E-09 | 9.60E-14          | up                       | 26.51                   | Not used            |
| PLSCR1       | Homo sapiens phospholipid scramblase 1 (PLSCR1), mRNA [NM_021105]                                                                                    | gene                  | 5.39E-03 | 1.79E-07          | up                       | 5.59                    | 319                 |
| PLXDC2       | Homo sapiens plexin domain containing 2 (PLXDC2), transcript variant 1, mRNA [NM_032812]                                                             | gene                  | 3.11E-04 | 1.03E-08          | up                       | 14.78                   | 320                 |
| PRKCH        | Homo sapiens protein kinase C, eta (PRKCH), mRNA [NM_006255]                                                                                         | gene                  | 2.42E-06 | 7.97E-11          | up                       | 26.16                   | 321                 |
| PRKCK        | Homo sapiens protein kinase C, theta (PRKCK), transcript variant 1, mRNA [NM_006257]                                                                 | gene                  | 1.81E-03 | 5.99E-08          | up                       | 8.61                    | 322                 |
| PRKCO-AS1    | Homo sapiens PRKCO antisense RNA 1 (PRKCO-AS1), transcript variant 1, long non-coding RNA [NR_036502]                                                | ncRNA                 | 4.83E-08 | 1.59E-12          | up                       | 39.44                   | Not used            |
| PRKCO-AS1    | PRKCO antisense RNA 1 [Source:HGNC Symbol;Acc:HGNC:44689] [ENST00000561822]                                                                          | RNA antisense         | 1.02E-02 | 3.41E-07          | up                       | 4.29                    | Not used            |
| PROK2        | Homo sapiens prokineticin 2 (PROK2), transcript variant 2, mRNA [NM_021935]                                                                          | gene                  | 1.15E-06 | 3.79E-11          | up                       | 209.32                  | 323                 |
| PRRS1        | Homo sapiens proline rich 5 like (PRRS1), transcript variant 2, mRNA [NM_024841]                                                                     | gene                  | 6.72E-03 | 2.23E-07          | up                       | 3.19                    | 324                 |
| PRSS23       | Homo sapiens protease, serine, 23 (PRSS23), transcript variant 1, mRNA [NM_007173]                                                                   | gene                  | 7.76E-04 | 2.57E-08          | up                       | 11.18                   | 325                 |
| PTAFR        | Homo sapiens platelet-activating factor receptor (PTAFR),                                                                                            |                       |          |                   |                          |                         |                     |

| Gene Symbol | Description                                                                                                                                                      | Feature Type  | p-value  | Corrected p-value | Regulation in NOTCH1-mut | Fold change (Mut vs WT) | Position in Heatmap |
|-------------|------------------------------------------------------------------------------------------------------------------------------------------------------------------|---------------|----------|-------------------|--------------------------|-------------------------|---------------------|
| RASGRP4     | Homo sapiens RAS guanyl releasing protein 4 (RASGRP4), transcript variant a, mRNA [NM_170604]                                                                    | gene          | 2.58E-02 | 8.61E-07          | up                       | 3.94                    | 336                 |
| RBP7        | Homo sapiens retinol binding protein 7, cellular (RBP7), mRNA [NM_052960]                                                                                        | gene          | 1.86E-09 | 6.12E-14          | up                       | 40.16                   | 337                 |
| RETN        | Homo sapiens resistin (RETN), transcript variant 1, mRNA [NM_020415]                                                                                             | gene          | 7.90E-06 | 2.60E-10          | up                       | 27.09                   | 338                 |
| RETN        | Homo sapiens resistin (RETN), transcript variant 1, mRNA [NM_020415]                                                                                             | gene          | 1.22E-05 | 4.01E-10          | up                       | 22.15                   | Not used            |
| RFFL        | Homo sapiens ring finger and FYVE-like domain containing E3 ubiquitin protein ligase (RFFL), transcript variant 2, mRNA [NM_001017368]                           | gene          | 4.48E-02 | 1.50E-06          | up                       | 2.08                    | 339                 |
| RFX8        | Homo sapiens RFX family member 8, lacking RFX DNA binding domain (RFX8), mRNA [NM_001145664]                                                                     | gene          | 1.47E-02 | 4.89E-07          | down                     | -1.93                   | 340                 |
| RGL4        | Homo sapiens ral guanine nucleotide dissociation stimulator-like 4 (RGL4), mRNA [NM_153615]                                                                      | gene          | 7.64E-07 | 2.51E-11          | up                       | 97.75                   | 341                 |
| RGS18       | Homo sapiens regulator of G-protein signaling 18 (RGS18), mRNA [NM_130782]                                                                                       | gene          | 2.43E-02 | 8.09E-07          | up                       | 16.99                   | 342                 |
| RNASE2      | Homo sapiens ribonuclease, RNase A family, 2 (liver, eosinophil-derived neurotoxin) (RNASE2), mRNA [NM_002934]                                                   | gene          | 1.77E-04 | 5.86E-09          | up                       | 26.72                   | 343                 |
| RNASE2      | Homo sapiens ribonuclease, RNase A family, 2 (liver, eosinophil-derived neurotoxin) (RNASE2), mRNA [NM_002934]                                                   | gene          | 4.47E-04 | 1.48E-08          | up                       | 21.23                   | Not used            |
| RNF166      | Homo sapiens ring finger protein 166 (RNF166), transcript variant 1, mRNA [NM_178841]                                                                            | gene          | 7.97E-03 | 2.65E-07          | up                       | 2.57                    | 344                 |
| RORA        | Homo sapiens RAR-related orphan receptor A (RORA), transcript variant 2, mRNA [NM_134260]                                                                        | gene          | 1.11E-04 | 3.67E-09          | up                       | 12.89                   | 345                 |
| RRAGD       | Homo sapiens Ras-related GTP binding D (RRAGD), mRNA [NM_021244]                                                                                                 | gene          | 5.15E-05 | 1.70E-09          | up                       | 20.72                   | 346                 |
| RUNX2       | Homo sapiens runt-related transcription factor 2 (RUNX2), transcript variant 1, mRNA [NM_001024630]                                                              | gene          | 2.87E-06 | 9.44E-11          | up                       | 9.03                    | 347                 |
| S100A11     | Homo sapiens S100 calcium binding protein A11 (S100A11), mRNA [NM_005620]                                                                                        | gene          | 6.97E-03 | 2.32E-07          | up                       | 12.95                   | 348                 |
| S100A11     | Homo sapiens S100 calcium binding protein A11 (S100A11), mRNA [NM_005620]                                                                                        | gene          | 4.12E-03 | 1.37E-07          | up                       | 11.35                   | Not used            |
| S100A12     | Homo sapiens S100 calcium binding protein A12 (S100A12), mRNA [NM_005621]                                                                                        | gene          | 4.05E-12 | 1.36E-16          | up                       | 936.58                  | 349                 |
| S100A12     | Homo sapiens S100 calcium binding protein A12 (S100A12), mRNA [NM_005621]                                                                                        | gene          | 1.61E-11 | 5.28E-16          | up                       | 600.81                  | Not used            |
| S100A8      | Homo sapiens S100 calcium binding protein A8 (S100A8), mRNA [NM_002964]                                                                                          | gene          | 2.86E-07 | 9.41E-12          | up                       | 1117.30                 | 350                 |
| S100A9      | Homo sapiens S100 calcium binding protein A9 (S100A9), mRNA [NM_002965]                                                                                          | gene          | 4.91E-08 | 1.61E-12          | up                       | 767.23                  | 351                 |
| S100P       | Homo sapiens S100 calcium binding protein P (S100P), mRNA [NM_005980]                                                                                            | gene          | 8.86E-07 | 2.91E-11          | up                       | 100.69                  | 352                 |
| S1PR5       | Homo sapiens sphingosine-1-phosphate receptor 5 (S1PR5), transcript variant 1, mRNA [NM_030760]                                                                  | gene          | 4.72E-03 | 1.57E-07          | up                       | 12.64                   | 353                 |
| SAMD3       | Homo sapiens sterile alpha motif domain containing 3 (SAMD3), transcript variant 1, mRNA [NM_001017373]                                                          | gene          | 2.14E-05 | 7.04E-10          | up                       | 14.96                   | 354                 |
| SAMD3       | Homo sapiens sterile alpha motif domain containing 3 (SAMD3), transcript variant 3, mRNA [NM_001258275]                                                          | gene          | 3.16E-03 | 1.05E-07          | up                       | 8.19                    | Not used            |
| SAP30       | Homo sapiens Sin3A-associated protein, 30kDa (SAP30), mRNA [NM_003864]                                                                                           | gene          | 5.78E-05 | 1.91E-09          | up                       | 7.29                    | 355                 |
| SEC14L4     | Homo sapiens SEC14-like 4 (S. cerevisiae) (SEC14L4), transcript variant 1, mRNA [NM_174977]                                                                      | gene          | 4.95E-03 | 1.65E-07          | down                     | -2.23                   | 356                 |
| SECTM1      | Homo sapiens secreted and transmembrane 1 (SECTM1), mRNA [NM_003004]                                                                                             | gene          | 1.45E-06 | 4.76E-11          | up                       | 56.35                   | 357                 |
| SEMA4C      | Homo sapiens sema domain, immunoglobulin domain (Ig), transmembrane domain (TM) and short cytoplasmic domain, (semaphorin) 4C (SEMA4C), mRNA [NM_017789]         | gene          | 3.49E-07 | 1.15E-11          | up                       | 7.67                    | 358                 |
| SERPINA1    | Homo sapiens serpin peptidase inhibitor, clade A (alpha-1 antipeptinase, antitrypsin), member 1 (SERPINA1), transcript variant 2, mRNA [NM_001002236]            | gene          | 8.75E-10 | 2.87E-14          | up                       | 75.13                   | 359                 |
| SERPINB10   | Homo sapiens serpin peptidase inhibitor, clade B (ovalbumin), member 10 (SERPINB10), mRNA [NM_005024]                                                            | gene          | 2.04E-02 | 6.80E-07          | up                       | 4.00                    | 360                 |
| SFTA1P      | Homo sapiens surfactant associated 1, pseudogene (SFTA1P), non-coding RNA [NR_027082]                                                                            | pseudogene    | 3.18E-02 | 1.06E-06          | down                     | -1.73                   | 361                 |
| SGK1        | Homo sapiens serum/glucocorticoid regulated kinase 1 (SGK1), transcript variant 1, mRNA [NM_005627]                                                              | gene          | 1.03E-02 | 3.43E-07          | up                       | 13.18                   | 362                 |
| SH2D1A      | Homo sapiens SH2 domain containing 1A (SH2D1A), transcript variant 1, mRNA [NM_002351]                                                                           | gene          | 1.76E-06 | 5.81E-11          | up                       | 15.73                   | 363                 |
| SH2D1A      | Homo sapiens SH2 domain containing 1A (SH2D1A), transcript variant 1, mRNA [NM_002351]                                                                           | gene          | 2.26E-04 | 7.48E-09          | up                       | 9.42                    | Not used            |
| SH2D1A      | Homo sapiens SH2 domain containing 1A (SH2D1A), transcript variant 2, mRNA [NM_001114937]                                                                        | gene          | 3.69E-05 | 1.22E-09          | up                       | 8.00                    | Not used            |
| SH2D1B      | Homo sapiens SH2 domain containing 1B (SH2D1B), mRNA [NM_053282]                                                                                                 | gene          | 9.97E-05 | 3.29E-09          | up                       | 13.26                   | 364                 |
| SH2D2A      | Homo sapiens SH2 domain containing 2A (SH2D2A), transcript variant 2, mRNA [NM_003975]                                                                           | gene          | 1.68E-02 | 5.61E-07          | up                       | 2.66                    | 365                 |
| SIPA1L2     | Homo sapiens signal-induced proliferation-associated 1 like 2 (SIPA1L2), mRNA [NM_020808]                                                                        | gene          | 3.72E-05 | 1.23E-09          | up                       | 24.53                   | 366                 |
| SIRPA       | Homo sapiens signal-regulatory protein alpha (SIRPA), transcript variant 1, mRNA [NM_001040022]                                                                  | gene          | 2.35E-04 | 7.78E-09          | up                       | 19.33                   | 367                 |
| SIRPB1      | Homo sapiens signal-regulatory protein beta 1 (SIRPB1), transcript variant 3, mRNA [NM_001135844]                                                                | gene          | 8.08E-03 | 2.69E-07          | up                       | 5.19                    | 368                 |
| SIRPB1      | PREDICTED: Homo sapiens signal-regulatory protein beta 1 (SIRPB1), mRNA [XM_006710250]                                                                           | miscellaneous | 1.66E-03 | 5.50E-08          | down                     | -2.23                   | Not used            |
| SIRPD       | Homo sapiens signal-regulatory protein delta (SIRPD), mRNA [NM_178460]                                                                                           | gene          | 2.32E-03 | 7.68E-08          | up                       | 4.95                    | 369                 |
| SIRPG       | Homo sapiens signal-regulatory protein gamma (SIRPG), transcript variant 1, mRNA [NM_018556]                                                                     | gene          | 6.52E-08 | 2.14E-12          | up                       | 21.47                   | 370                 |
| SLC11A1     | Homo sapiens solute carrier family 11 (proton-coupled divalent metal ion transporter), member 1 (SLC11A1), mRNA [NM_000578]                                      | gene          | 2.15E-04 | 7.09E-09          | up                       | 16.13                   | 371                 |
| SLC11A1     | Homo sapiens solute carrier family 11 (proton-coupled divalent metal ion transporter), member 1 (SLC11A1), mRNA [NM_000578]                                      | gene          | 4.86E-02 | 1.63E-06          | up                       | 6.05                    | Not used            |
| SLC19A1     | Homo sapiens solute carrier family 19 (folate transporter), member 1 (SLC19A1), transcript variant 1, mRNA [NM_194255]                                           | gene          | 3.63E-02 | 1.21E-06          | up                       | 3.98                    | 372                 |
| SLC19A3     | Homo sapiens solute carrier family 19 (thiamine transporter), member 3 [Source:HGNC Symbol;Acc:HGNC:16266] [ENST00000409456]                                     | gene          | 1.59E-02 | 5.29E-07          | down                     | -2.98                   | 373                 |
| SLC22A4     | Homo sapiens solute carrier family 22 (organic cation/zwitterion transporter), member 4 (SLC22A4), mRNA [NM_003059]                                              | gene          | 2.59E-11 | 8.51E-16          | up                       | 19.41                   | 374                 |
| SLC25A37    | Homo sapiens solute carrier family 25 (mitochondrial iron transporter), member 37 (SLC25A37), mRNA [NM_016612]                                                   | gene          | 1.55E-04 | 5.12E-09          | up                       | 6.73                    | 375                 |
| SLC2A14     | Homo sapiens solute carrier family 2 (facilitated glucose transporter), member 14 (SLC2A14), transcript variant 1, mRNA [NM_001286233]                           | gene          | 9.75E-03 | 3.24E-07          | up                       | 11.59                   | 376                 |
| SLC2A3      | Homo sapiens solute carrier family 2 (facilitated glucose transporter), member 3 (SLC2A3), mRNA [NM_006931]                                                      | gene          | 1.47E-02 | 4.90E-07          | up                       | 11.70                   | 377                 |
| SLC31A2     | Homo sapiens solute carrier family 31 (copper transporter), member 2 (SLC31A2), mRNA [NM_001860]                                                                 | gene          | 2.54E-04 | 8.11E-09          | up                       | 26.84                   | 378                 |
| SLC8A1      | Homo sapiens solute carrier family 8 (sodium/calcium exchanger), member 1 (SLC8A1), transcript variant A, mRNA [NM_021097]                                       | gene          | 3.31E-03 | 1.10E-07          | up                       | 4.55                    | 379                 |
| SLCO3A1     | Homo sapiens solute carrier organic anion transporter family, member 3A1 (SLCO3A1), transcript variant 1, mRNA [NM_013272]                                       | gene          | 1.08E-04 | 3.58E-09          | up                       | 9.15                    | 380                 |
| SLOC4C1     | Homo sapiens solute carrier organic anion transporter family, member 4C1 (SLOC4C1), mRNA [NM_180991]                                                             | gene          | 1.23E-02 | 4.11E-07          | up                       | 5.37                    | 381                 |
| SLITRK4     | Homo sapiens SLIT and NTRK-like family, member 4 (SLITRK4), transcript variant 2, mRNA [NM_173078]                                                               | gene          | 4.57E-02 | 1.53E-06          | up                       | 6.15                    | 382                 |
| SLPI        | Homo sapiens secretory leukocyte peptidase inhibitor (SLPI), mRNA [NM_003064]                                                                                    | gene          | 8.29E-06 | 2.73E-10          | up                       | 38.46                   | 383                 |
| SMARCD3     | Homo sapiens SWI/SNF related, matrix associated, actin dependent regulator of chromatin, subfamily d, member 3 (SMARCD3), transcript variant 2, mRNA [NM_003078] | gene          | 8.99E-05 | 2.97E-09          | up                       | 5.40                    | 384                 |
| SMIM3       | Homo sapiens small integral membrane protein 3 (SMIM3), mRNA [NM_032947]                                                                                         | gene          | 5.25E-03 | 1.74E-07          | up                       | 25.62                   | 385                 |
| SMPLD3A     | Homo sapiens sphingomyelin phosphodiesterase, acid-like 3A (SMPLD3A), transcript variant 1, mRNA [NM_006714]                                                     | gene          | 1.43E-03 | 4.73E-08          | up                       | 9.13                    | 386                 |
| SNAR-A3     | Homo sapiens small ILF3/NF90-associated RNA A3 (SNAR-A3), small nuclear RNA [NR_024214]                                                                          | gene          | 1.64E-02 | 5.46E-07          | down                     | -1.92                   | 387                 |
| SOC3S       | Homo sapiens suppressor of cytokine signaling 3 (SOC3S), mRNA [NM_003955]                                                                                        | gene          | 2.99E-06 | 9.85E-11          | up                       | 42.91                   | 388                 |
| SOD2        | Homo sapiens superoxide dismutase 2, mitochondrial (SOD2), transcript variant 2, mRNA [NM_001024465]                                                             | gene          | 1.50E-06 | 1.06E-10          | up                       | 8.98                    | 389                 |
| SORL1       | Homo sapiens sortilin-related receptor, LDLR class A repeats containing (SORL1), mRNA [NM_003105]                                                                | gene          | 3.86E-04 | 1.28E-08          | up                       | 49.50                   | 390                 |
| SRGN        | Homo sapiens serglycin (SRGN), transcript variant 1, mRNA [NM_002727]                                                                                            | gene          | 3.57E-03 | 1.18E-07          | up                       | 3.78                    | 391                 |
| SRXN1       | Homo sapiens sulfiredoxin 1 (SRXN1), mRNA [NM_080725]                                                                                                            | gene          | 3.75E-05 | 1.24E-09          | up                       | 16.00                   | 392                 |
| ST3GAL4     | Homo sapiens cDNA FLJ11867 fls, clone HEMBA1006976, weakly similar to H.sapiens mRNA for Gal-beta(1-3/1-4)GlcNAc alpha-2-3-sialyltransferase. [AK021929]         | gene          | 3.20E-03 | 1.06E-07          | up                       | 11.92                   | 393                 |
| ST3GAL6     | Homo sapiens ST3 beta-galactoside alpha-2,3-sialyltransferase 6 (ST3GAL6), transcript variant 1, mRNA [NM_006100]                                                | gene          | 2.57E-02 | 8.58E-07          | up                       | 5.68                    | 394                 |
| ST6GALNAC2  | Homo sapiens ST6 (alpha-N-acetyl-neuraminyl-2,3-beta-galactosyl-1,3)-N-acetylgalactosaminide alpha-2,6-sialyltransferase 2 (ST6GALNAC2), mRNA [NM_006456]        | gene          | 7.33E-03 | 2.44E-07          | up                       | 7.84                    | 395                 |
| STEAP4      | Homo sapiens STEAP family member 4 (STEAP4), transcript variant 2, mRNA [NM_001205315]                                                                           | gene          | 3.78E-03 | 1.25E-07          | up                       | 15.11                   | 396                 |
| STOM        | Homo sapiens stomatin (STOM), transcript variant 2, mRNA [NM_198194]                                                                                             | gene          | 8.01E-03 | 2.66E-07          | up                       | 7.63                    | 397                 |
| SVIL        | Homo sapiens supervillin (SVIL), transcript variant 2, mRNA [NM_021738]                                                                                          | gene          | 2.05E-05 | 6.77E-10          | up                       | 13.25                   | 398                 |
| TACSTD2     | Homo sapiens tumor-associated calcium signal transducer 2 (TACSTD2), mRNA [NM_002353]                                                                            | gene          | 4.56E-02 | 1.53E-06          | up                       | 6.89                    | 399                 |
| TARP        | Homo sapiens TCR gamma alternate reading frame protein (TARP), transcript variant 1, mRNA [NM_001003799]                                                         | gene          | 1.41E-06 | 4.63E-11          | up                       | 25.40                   | 400                 |
| TBC1D28     | Homo sapiens TBC1 domain family, member 28 (TBC1D28), mRNA [NM_001039397]                                                                                        | gene          | 2.77E-03 | 9.17E-08          | down                     | -2.41                   | 401                 |
| TBC1D4      | Homo sapiens TBC1 domain family, member 4 (TBC1D4), transcript variant 1, mRNA [NM_014832]                                                                       | gene          | 1.86E-04 | 6.15E-09          | up                       | 7.66                    | 402                 |
| TC2N        | Homo sapiens tandem C2 domains, nuclear (TC2N), transcript variant 1, mRNA [NM_152332]                                                                           | gene          | 4.23E-06 | 1.39E-10          | up                       | 12.10                   | 403                 |
| TCN1        | Homo sapiens transcobalamin 1 (vitamin B12 binding protein, R binder family) (TCN1), mRNA [NM_0010162]                                                           | gene          | 6.32E-06 | 2.08E-10          | up                       | 23.29                   | 404                 |
| THBD        | Homo sapiens thrombomodulin (THBD), mRNA [NM_000361]                                                                                                             | gene          | 3.51E-08 | 1.15E-12          | up                       | 91.98                   | 405                 |
| THEMIS      | Homo sapiens thymocyte selection associated (THEMIS), transcript variant 1, mRNA [NM_001164685]                                                                  | gene          | 4.47E-05 | 1.47E-09          | up                       | 9.06                    | 406                 |
| TIAM1       | Homo sapiens T-cell lymphoma invasion and metastasis 1 (TIAM1), mRNA [NM_003253]                                                                                 | gene          | 5.88E-06 | 1.94E-10          | up                       | 20.93                   | 407                 |
| TLR4        | Homo sapiens toll-like receptor 4 (TLR4), transcript variant 1, mRNA [NM_138554]                                                                                 | gene          | 2.16E-02 | 7.21E-07          | up                       | 15.54                   | 408                 |
| TLR4        | Homo sapiens toll-like receptor 4 (TLR4), transcript variant 1, mRNA [NM_138554]                                                                                 | gene          | 1.53E-02 | 5.10E-07          | up                       | 12.36                   | Not used            |
| TLR8        | Homo sapiens toll-like receptor 8 (TLR8), transcript variant 1, mRNA [NM_016610]                                                                                 | gene          | 4.29E-08 | 1.41E-12          | up                       | 19.13                   | 409                 |
| TMEM173     | Homo sapiens transmembrane protein 173 (TMEM173), transcript variant 1, mRNA [NM_198282]                                                                         | gene          | 5.61E-06 | 1.85E-10          | up                       | 5.64                    | 410                 |
| TMEM175     | Homo sapiens transmembrane protein 175 (TMEM175), transcript variant 6, mRNA [NM_001297427]                                                                      | gene          | 3.09E-02 | 1.03E-06          | down                     | -2.32                   | 411                 |
| TMEM40      | Homo sapiens transmembrane protein 40 (TMEM40), transcript variant 1, mRNA [NM_001284406]                                                                        | gene          | 9.56E-03 | 3.18E-07          | down                     | -2.11                   | 412                 |
| TMEM45B     | Homo sapiens transmembrane protein 45B (TMEM45B), mRNA [NM_138788]                                                                                               | gene          | 9.65E-03 | 3.21E-07          | up                       | 6.60                    | 413                 |
| TNFAIP2     | Homo sapiens tumor necrosis factor, alpha-induced protein 2 (TNFAIP2), mRNA [NM_006291]                                                                          | gene          | 8.62E-08 | 2.83E-12          | up                       | 170.14                  | 414                 |
| TNFAIP6     | Homo sapiens tumor necrosis factor, alpha-induced protein 6 (TNFAIP6), mRNA [NM_007115]                                                                          | gene          | 5.67E-03 | 1.89E-07          | up                       | 38.13                   | 415                 |
| TNFRSF10C   | Homo sapiens tumor necrosis factor receptor superfamily, member 10c, decoy without an intracellular domain (TNFRSF10C), mRNA [NM_003841]                         | gene          | 5.44E-11 | 1.78E-15          | up                       | 256.57                  | 416                 |
| TNFRSF1A    | Homo sapiens tumor necrosis factor receptor superfamily, member 1A (TNFRSF1A), mRNA [NM_001065]                                                                  | gene          | 3.15E-03 | 1.05E-07          | up                       | 4.91                    | 417                 |
| TNFRSF25    | Homo sapiens tumor necrosis factor receptor superfamily, member 25 (TNFRSF25), transcript variant 1, mRNA [NM_148965]                                            | gene          | 6.60E-07 | 2.17E-11          | up                       | 29.76                   | 418                 |
| TNFRSF25    | Homo sapiens tumor necrosis factor receptor superfamily, member 25 (TNFRSF25), transcript variant 12, mRNA [NM_001039664]                                        | gene          | 1.57E-03 | 5.20E-08          | up                       | 3.95                    | Not used            |
| TNFSF13B    | Homo sapiens tumor necrosis factor (ligand) superfamily, member 13b (TNFSF13B), transcript variant 1, mRNA [NM_006573]                                           | gene          | 1.98E-02 | 6.60E-07          | up                       | 4.22                    | 419                 |
| TNFSF14     | Homo sapiens tumor necrosis factor (ligand) superfamily, member 14 (TNFSF14), transcript variant 1, mRNA [NM_003807]                                             | gene          | 3.14E-03 | 1.04E-07          | up                       | 14.17                   | 420                 |
| TNIK        | Homo sapiens TRAF2 and NCK interacting kinase (TNK), transcript variant 1, mRNA [NM_015028]                                                                      | gene          | 3.08E-02 | 1.03E-06          | up                       | 4.84                    | 421                 |
| TRAPPC3L    | trafficking protein particle complex 3-like [Source:HGNC Symbol;Acc:HGNC:21090] [ENST00000356128]                                                                | gene          | 9.04E-03 | 3.01E-07          | down                     | -2.08                   | 422                 |
| TRAT1       | Homo sapiens T cell receptor associated transmembrane adaptor 1 (TRAT1), mRNA [NM_016388]                                                                        | gene          | 2.25E-06 | 7.40E-11          | up                       | 33.54                   | 423                 |
| TREM1       | Homo sapiens triggering receptor expressed on myeloid cells 1 (TREM1), transcript variant 1, mRNA [NM_018643]                                                    | gene          | 2.90E-08 | 9.53E-13          | up                       | 197.86                  | 424                 |
| TREM1       | Homo sapiens triggering receptor expressed on myeloid cells 1 (TREM1), transcript variant 2, mRNA [NM_001242589]                                                 | gene          | 4.89E-04 | 1.62E-08          | up                       | 64.90                   | Not used            |
| TREM1       | Homo sapiens triggering receptor expressed on myeloid cells 1 (TREM1), transcript variant 1, mRNA [NM_018643]                                                    | gene          | 2.06E-03 | 6.84E-08          | up                       | 13.26                   | Not used            |
| TRERF1      | Homo sapiens transcriptional regulating factor 1 (TRERF1), transcript variant 1, mRNA [NM_001297573]                                                             | gene          | 4.98E-03 | 1.65E-07          | up                       | 5.54                    | 425                 |
| TSZH2       | Homo sapiens teashirt zinc finger homeobox 3 (TSZH2), mRNA [NM_020856]                                                                                           | gene          | 5.       |                   |                          |                         |                     |

| Gene Symbol    | Description                                                                           | Feature Type | p-value  | Corrected p-value | Regulation in NOTCH1-mut | Fold change (Mut vs WT) | Position in Heatmap |
|----------------|---------------------------------------------------------------------------------------|--------------|----------|-------------------|--------------------------|-------------------------|---------------------|
| WDFY3          | Homo sapiens WD repeat and FYVE domain containing 3 (WDFY3), mRNA [NM_014991]         | gene         | 6.47E-04 | 2.14E-08          | up                       | 10.33                   | Not used            |
| WDR6           | Homo sapiens WD repeat domain 6 (WDR6), mRNA [NM_018031]                              | gene         | 9.37E-05 | 3.09E-09          | down                     | -2.13                   | 438                 |
| XCL1           | Homo sapiens chemokine (C motif) ligand 1 (XCL1), mRNA [NM_002995]                    | gene         | 3.65E-02 | 1.22E-06          | up                       | 8.27                    | 439                 |
| XLOC_I2_005415 | BROAD Institute lincRNA (XLOC_I2_005415), lincRNA [TCONS_I2_00010039]                 | lincRNA      | 1.13E-02 | 3.76E-07          | down                     | -1.85                   | Not used            |
| YY2            | Homo sapiens YY2 transcription factor (YY2), mRNA [NM_206923]                         | gene         | 2.98E-03 | 9.87E-08          | down                     | -1.87                   | 440                 |
| ZBTB32         | Homo sapiens zinc finger and BTB domain containing 32 (ZBTB32), mRNA [NM_014383]      | gene         | 1.87E-02 | 6.22E-07          | down                     | -1.98                   | 441                 |
| ZMIZ1          | Homo sapiens zinc finger, MIZ-type containing 1 (ZMIZ1), mRNA [NM_020338]             | gene         | 3.78E-03 | 1.25E-07          | up                       | 11.98                   | 442                 |
| ZNF700         | Homo sapiens zinc finger protein 700 (ZNF700), transcript variant 1, mRNA [NM_144566] | gene         | 4.49E-02 | 1.50E-06          | down                     | -2.78                   | 443                 |

Supplementary Table 4. Differentially expressed probes between NOTCH1 -mut and WT CLL cases.

| Gene Symbol    | Description                                                                                                                               | Feature Type          | p-value  | Corrected p-value | Regulation in NOTCH1-mut (Mut vs WT) | Fold change | Position in Heatmap |
|----------------|-------------------------------------------------------------------------------------------------------------------------------------------|-----------------------|----------|-------------------|--------------------------------------|-------------|---------------------|
| A_19_P00315810 | not provided                                                                                                                              | unannotated probe     | 7.48E-07 | 2.15E-02          | down                                 | -2.28       | Not used            |
| A_19_P00318390 | not provided                                                                                                                              | unannotated probe     | 6.04E-07 | 1.74E-02          | down                                 | -4.21       | Not used            |
| A_19_P00318679 | PREDICTED: Homo sapiens uncharacterized LOC102723493 (LOC102723493), transcript variant X1, ncRNA [XR_424607]                             | ncRNA                 | 1.65E-06 | 4.68E-02          | down                                 | -4.08       | Not used            |
| A_19_P00318904 | not provided                                                                                                                              | unannotated probe     | 4.23E-11 | 1.27E-06          | up                                   | 10.91       | Not used            |
| A_19_P00319413 | not provided                                                                                                                              | unannotated probe     | 1.51E-06 | 4.29E-02          | up                                   | 11.50       | Not used            |
| A_19_P00320108 | not provided                                                                                                                              | unannotated probe     | 2.13E-08 | 6.29E-04          | down                                 | -2.84       | Not used            |
| A_19_P00320780 | not provided                                                                                                                              | unannotated probe     | 1.18E-06 | 3.37E-02          | down                                 | -2.23       | Not used            |
| A_19_P00321461 | not provided                                                                                                                              | unannotated probe     | 8.38E-07 | 2.40E-02          | down                                 | -2.46       | Not used            |
| A_19_P00322569 | Homo sapiens precursor microRNA mir-34a, complete sequence. [EF609116]                                                                    | miscellaneous         | 2.07E-07 | 6.02E-03          | down                                 | -2.49       | Not used            |
| A_19_P00804120 | not provided                                                                                                                              | unannotated probe     | 3.73E-07 | 1.08E-02          | down                                 | -3.43       | Not used            |
| A_19_P00809068 | Homo sapiens cDNA FLJ42830 fis, clone BRCAN2017905. [AK124820]                                                                            | miscellaneous         | 1.08E-08 | 3.19E-04          | down                                 | -3.87       | Not used            |
| A_19_P00810205 | CENB2 pseudogene 1 [Source:HGNC Symbol;Acc:HGNC:50850] [ENST00000399411]                                                                  | pseudogene            | 1.60E-06 | 4.54E-02          | up                                   | 2.39        | Not used            |
| A_21_P0001917  | not provided                                                                                                                              | unannotated probe     | 2.06E-08 | 6.09E-04          | down                                 | -2.35       | Not used            |
| A_21_P0001948  | not provided                                                                                                                              | unannotated probe     | 1.41E-06 | 4.02E-02          | down                                 | -2.90       | Not used            |
| A_21_P0001971  | not provided                                                                                                                              | unannotated probe     | 6.96E-07 | 2.00E-02          | down                                 | -2.26       | Not used            |
| A_21_P0003332  | not provided                                                                                                                              | unannotated probe     | 4.54E-07 | 1.31E-02          | down                                 | -2.32       | Not used            |
| A_21_P0003411  | not provided                                                                                                                              | unannotated probe     | 7.93E-08 | 2.32E-03          | down                                 | -3.64       | Not used            |
| A_21_P0004809  | not provided                                                                                                                              | unannotated probe     | 1.85E-08 | 5.46E-04          | down                                 | -3.84       | Not used            |
| A_21_P0005323  | RST29320 Athersys RAGE Library Homo sapiens cDNA, mRNA sequence [BG209803]                                                                | miscellaneous         | 7.61E-08 | 2.23E-03          | down                                 | -2.77       | Not used            |
| A_21_P0005760  | not provided                                                                                                                              | unannotated probe     | 7.72E-07 | 2.22E-02          | down                                 | -2.35       | Not used            |
| A_21_P0005878  | not provided                                                                                                                              | unannotated probe     | 9.24E-07 | 2.65E-02          | down                                 | -4.21       | Not used            |
| A_21_P0006073  | not provided                                                                                                                              | unannotated probe     | 3.63E-07 | 1.05E-02          | down                                 | -3.01       | Not used            |
| A_21_P0006435  | Homo sapiens cDNA clone IMAGE:2329410 3' similar to contains Alu repetitive element;mRNA sequence [AI932388]                              | miscellaneous         | 4.94E-07 | 1.42E-02          | down                                 | -3.61       | Not used            |
| A_21_P0008460  | numb homolog (Drosophila) [Source:HGNC Symbol;Acc:HGNC:8060] [ENST00000557577]                                                            | miscellaneous         | 3.48E-09 | 1.04E-04          | up                                   | 22.09       | Not used            |
| A_21_P0008692  | Homo sapiens mRNA full length insert cDNA clone EUROIMAGE 362430. [AL109706]                                                              | miscellaneous         | 1.14E-09 | 3.40E-05          | up                                   | 7.67        | Not used            |
| A_21_P0008913  | not provided                                                                                                                              | unannotated probe     | 1.08E-06 | 3.07E-02          | down                                 | -2.74       | Not used            |
| A_21_P0008949  | not provided                                                                                                                              | unannotated probe     | 1.22E-07 | 3.58E-03          | up                                   | 9.76        | Not used            |
| A_21_P0009251  | not provided                                                                                                                              | unannotated probe     | 2.86E-09 | 8.51E-05          | down                                 | -4.00       | Not used            |
| A_21_P0009956  | not provided                                                                                                                              | unannotated probe     | 1.59E-08 | 4.71E-04          | down                                 | -3.98       | Not used            |
| A_21_P0010382  | not provided                                                                                                                              | unannotated probe     | 1.47E-08 | 4.35E-04          | down                                 | -4.61       | Not used            |
| A_21_P0010812  | supervillin pseudogene 1 [Source:HGNC Symbol;Acc:HGNC:44959] [ENST00000422642]                                                            | pseudogene            | 1.04E-10 | 3.14E-06          | up                                   | 9.63        | Not used            |
| A_21_P0010899  | not provided                                                                                                                              | unannotated probe     | 6.95E-07 | 2.00E-02          | down                                 | -4.15       | Not used            |
| A_21_P0011052  | ribosomal protein L7 pseudogene 38 [Source:HGNC Symbol;Acc:HGNC:36731] [ENST00000488396]                                                  | pseudogene            | 3.15E-07 | 9.14E-03          | down                                 | -3.93       | Not used            |
| A_21_P0011259  | NADH dehydrogenase (ubiquinone) 1 beta subcomplex, 4, 15kDa pseudogene 2 [Source:HGNC Symbol;Acc:HGNC:45250] [ENST00000509515]            | pseudogene            | 2.96E-07 | 8.60E-03          | up                                   | 12.47       | Not used            |
| A_21_P0011332  | chondroitin sulfate proteoglycan 4 pseudogene 13 [Source:HGNC Symbol;Acc:HGNC:49195] [ENST00000567704]                                    | pseudogene            | 8.44E-07 | 2.42E-02          | down                                 | -2.48       | Not used            |
| A_21_P0011573  | not provided                                                                                                                              | unannotated probe     | 2.19E-08 | 6.46E-04          | down                                 | -4.02       | Not used            |
| A_21_P0011712  | not provided                                                                                                                              | unannotated probe     | 7.56E-07 | 2.17E-02          | down                                 | -2.08       | Not used            |
| A_21_P0012018  | CD8b molecule [Source:HGNC Symbol;Acc:HGNC:1707] [ENST00000431506]                                                                        | miscellaneous         | 1.74E-08 | 5.14E-04          | up                                   | 15.09       | Not used            |
| A_21_P0012105  | crystallin, gamma E, pseudogene [Source:HGNC Symbol;Acc:HGNC:2412] [ENST00000440809]                                                      | pseudogene            | 1.12E-07 | 3.26E-03          | down                                 | -2.63       | Not used            |
| A_21_P0012520  | ribosomal protein S4 pseudogene 31 [Source:HGNC Symbol;Acc:HGNC:35558] [ENST00000416648]                                                  | pseudogene            | 1.24E-08 | 3.66E-04          | down                                 | -5.56       | Not used            |
| A_21_P0012528  | family with sequence similarity 157, member C [Source:HGNC Symbol;Acc:HGNC:34081] [ENST00000507230]                                       | miscellaneous         | 1.23E-06 | 3.50E-02          | up                                   | 3.04        | Not used            |
| A_21_P0012555  | RST25461 Athersys RAGE Library Homo sapiens cDNA, mRNA sequence [BG206026]                                                                | miscellaneous         | 6.86E-07 | 1.97E-02          | down                                 | -3.04       | Not used            |
| A_21_P0012887  | Homo sapiens programmed cell death 6 pseudogene, mRNA [cDNA clone IMAGE:290119], with apparent retained intron. [BC020552]                | miscellaneous         | 2.04E-08 | 6.03E-04          | down                                 | -2.64       | Not used            |
| A_21_P0013000  | MT-ND4 pseudogene 12 [Source:HGNC Symbol;Acc:HGNC:42199] [ENST00000498999]                                                                | pseudogene            | 5.85E-07 | 1.68E-02          | down                                 | -2.18       | Not used            |
| A_21_P0013065  | not provided                                                                                                                              | unannotated probe     | 1.37E-07 | 4.01E-03          | down                                 | -7.31       | Not used            |
| A_21_P0013136  | not provided                                                                                                                              | unannotated probe     | 1.15E-09 | 3.43E-05          | down                                 | -5.47       | Not used            |
| A_21_P0013201  | trinucleotide repeat containing 18 pseudogene 3 [Source:HGNC Symbol;Acc:HGNC:34015] [ENST00000441896]                                     | pseudogene            | 1.85E-08 | 5.48E-04          | down                                 | -2.06       | Not used            |
| A_21_P0013254  | not provided                                                                                                                              | unannotated probe     | 7.42E-08 | 2.18E-03          | down                                 | -2.36       | Not used            |
| A_21_P0013307  | DB088317 TEST14 Homo sapiens cDNA clone TEST14036494 5', mRNA sequence [DB088317]                                                         | miscellaneous         | 6.50E-07 | 1.87E-02          | down                                 | -2.77       | Not used            |
| A_21_P0013340  | CC21 vacuolar protein trafficking and biogenesis associated homolog (S. cerevisiae) [Source:HGNC Symbol;Acc:HGNC:21691] [ENST00000478627] | miscellaneous         | 2.00E-08 | 5.91E-04          | down                                 | -2.16       | Not used            |
| A_21_P0013704  | not provided                                                                                                                              | unannotated probe     | 5.44E-07 | 1.57E-02          | down                                 | -2.63       | Not used            |
| A_21_P0013807  | not provided                                                                                                                              | unannotated probe     | 1.28E-07 | 3.73E-03          | down                                 | -3.34       | Not used            |
| A_21_P0013934  | af85e03.s1 Soares_testis_NHT Homo sapiens cDNA clone 1048828 3', mRNA sequence [AA778499]                                                 | miscellaneous         | 2.45E-08 | 7.24E-04          | down                                 | -2.34       | Not used            |
| A_21_P0013961  | Homo sapiens cDNA FLJ46332 fis, clone TEST14045470. [AK128835]                                                                            | miscellaneous         | 4.75E-11 | 1.43E-06          | down                                 | -25.22      | Not used            |
| A_21_P0013999  | not provided                                                                                                                              | unannotated probe     | 7.25E-09 | 2.15E-04          | up                                   | 9.00        | Not used            |
| A_21_P0014131  | not provided                                                                                                                              | unannotated probe     | 1.76E-06 | 4.99E-02          | up                                   | 3.42        | Not used            |
| A_21_P0014192  | not provided                                                                                                                              | unannotated probe     | 2.05E-07 | 5.95E-03          | down                                 | -2.28       | Not used            |
| A_21_P0014266  | PREDICTED: Homo sapiens uncharacterized LOC100507417 (LOC100507417), misc_RNA [XR_132956]                                                 | uncharacterized locus | 1.53E-15 | 4.65E-11          | up                                   | 12.71       | Not used            |
| A_21_P0014281  | BX096603 Soares_testis_NHT Homo sapiens cDNA clone IMAGP998H151782, mRNA sequence [BX096603]                                              | miscellaneous         | 3.06E-08 | 9.03E-04          | up                                   | 7.86        | Not used            |
| A_21_P0014391  | not provided                                                                                                                              | unannotated probe     | 3.97E-07 | 1.15E-02          | down                                 | -2.36       | Not used            |
| A_21_P0014468  | not provided                                                                                                                              | unannotated probe     | 1.05E-06 | 3.01E-02          | down                                 | -4.18       | Not used            |
| A_21_P0014504  | long intergenic non-protein coding RNA 402 [Source:HGNC Symbol;Acc:HGNC:42732] [ENST00000419499]                                          | long intergenic RNA   | 4.81E-13 | 1.46E-08          | up                                   | 14.11       | Not used            |
| A_21_P0014751  | Homo sapiens mRNA, cDNA DKF2p781J0350 (from clone DKF2p781J0350). [CR933663]                                                              | miscellaneous         | 9.17E-07 | 2.62E-02          | down                                 | -3.73       | Not used            |
| A_21_P0014771  | not provided                                                                                                                              | unannotated probe     | 8.79E-08 | 2.58E-03          | down                                 | -12.39      | Not used            |
| A_21_P0014780  | not provided                                                                                                                              | unannotated probe     | 9.40E-08 | 2.75E-03          | down                                 | -2.92       | Not used            |
| A_21_P0014876  | not provided                                                                                                                              | unannotated probe     | 1.35E-07 | 3.94E-03          | down                                 | -3.45       | Not used            |
| A_21_P0014925  | not provided                                                                                                                              | unannotated probe     | 4.68E-07 | 1.35E-02          | down                                 | -2.34       | Not used            |
| A_23_P191557   | long intergenic non-protein coding RNA 334 [Source:HGNC Symbol;Acc:HGNC:16425] [ENST00000328344]                                          | long intergenic RNA   | 7.57E-07 | 2.17E-02          | down                                 | -3.35       | Not used            |
| A_23_P193129   | double homeobox 4 like 11 [Source:HGNC Symbol;Acc:HGNC:38687] [ENST00000611504]                                                           | miscellaneous         | 2.85E-08 | 8.40E-04          | down                                 | -3.09       | Not used            |
| A_23_P196673   | protein tyrosine phosphatase type IVA, member 1 pseudogene 7 [Source:HGNC Symbol;Acc:HGNC:41934] [ENST00000423476]                        | pseudogene            | 1.27E-06 | 3.62E-02          | down                                 | -8.23       | Not used            |
| A_23_P68870    | Homo sapiens hypothetical protein FLJ23185, mRNA (cDNA clone IMAGE:4994346), with apparent retained intron. [BC021857]                    | miscellaneous         | 1.05E-06 | 2.99E-02          | up                                   | 10.86       | Not used            |
| A_24_P126741   | glutaredoxin (thioltransferase) pseudogene 3 [Source:HGNC Symbol;Acc:HGNC:34049] [ENST00000470810]                                        | pseudogene            | 7.28E-14 | 2.39E-09          | up                                   | 61.02       | Not used            |
| A_24_P128727   | olfactory receptor, family 7, subfamily E, member 62 pseudogene [Source:HGNC Symbol;Acc:HGNC:8438] [ENST00000456741]                      | pseudogene            | 2.87E-07 | 6.62E-03          | down                                 | -3.48       | Not used            |
| A_24_P135628   | PREDICTED: Homo sapiens uncharacterized LOC100996760 (LOC100996760), transcript variant X1, mRNA [XM_005276385]                           | uncharacterized locus | 1.39E-09 | 7.13E-05          | down                                 | -4.23       | Not used            |
| A_24_P153324   | ribosomal protein L7 pseudogene 44 [Source:HGNC Symbol;Acc:HGNC:36143] [ENST0000042827]                                                   | pseudogene            | 2.46E-07 | 4.27E-03          | down                                 | -9.71       | Not used            |
| A_24_P15502    | interferon induced transmembrane protein 8 pseudogene [Source:HGNC Symbol;Acc:HGNC:32202] [ENST00000552259]                               | pseudogene            | 4.97E-10 | 1.49E-05          | up                                   | 14.01       | Not used            |
| A_24_P15640    | Homo sapiens chromosome 19 open reading frame 31, mRNA (cDNA clone MGC:168625 IMAGE:9021002), complete cds. [BC137009]                    | miscellaneous         | 2.19E-08 | 6.47E-04          | down                                 | -5.96       | Not used            |
| A_24_P212819   | Homo sapiens cDNA FLJ25155 fis, clone CBRO7976. [AK057884]                                                                                | miscellaneous         | 1.87E-10 | 5.61E-06          | down                                 | -6.26       | Not used            |
| A_24_P213763   | Homo sapiens cDNA clone IMAGE:4341068, **** WARNING: chimeric clone ****. [BC013798]                                                      | miscellaneous         | 1.39E-07 | 4.07E-03          | up                                   | 13.09       | Not used            |
| A_24_P24002    | not provided                                                                                                                              | unannotated probe     | 1.12E-07 | 3.28E-03          | down                                 | -2.96       | Not used            |
| A_24_P254833   | T cell receptor beta variable 7-9 [Source:HGNC Symbol;Acc:HGNC:12243] [ENST0000061287]                                                    | miscellaneous         | 4.21E-07 | 1.21E-02          | up                                   | 5.09        | Not used            |
| A_24_P309664   | ribosomal protein S11 pseudogene 7 [Source:HGNC Symbol;Acc:HGNC:36724] [ENST00000442125]                                                  | pseudogene            | 1.73E-06 | 4.92E-02          | down                                 | -3.94       | Not used            |
| A_24_P323635   | ribosomal protein L10a pseudogene 3 [Source:HGNC Symbol;Acc:HGNC:29803] [ENST00000462520]                                                 | pseudogene            | 9.94E-07 | 2.84E-02          | down                                 | -4.55       | Not used            |
| A_24_P333106   | not provided                                                                                                                              | unannotated probe     | 8.32E-07 | 2.38E-02          | down                                 | -2.76       | Not used            |
| A_24_P340976   | Q2L9XO_CERAE (Q2L9XO) Laminin receptor 1, partial (81%) [THC2530888]                                                                      | miscellaneous         | 2.14E-07 | 6.21E-03          | down                                 | -1.85       | Not used            |
| A_24_P341677   | GB                                                                                                                                        | unannotated probe     | 2.71E-07 | 7.86E-03          | down                                 | -2.08       | Not used            |
| A_24_P348083   | Homo sapiens chromosome 18 open reading frame 23, mRNA (cDNA clone MGC:120885 IMAGE:7939695), complete cds. [BC093850]                    | miscellaneous         | 4.31E-09 | 1.28E-04          | down                                 | -6.65       | Not used            |
| A_24_P350307   | ribosomal protein L18 pseudogene 11 [Source:HGNC Symbol;Acc:HGNC:35742] [ENST00000494933]                                                 | pseudogene            | 1.98E-07 | 5.77E-03          | down                                 | -2.21       | Not used            |
| A_24_P357468   | T cell receptor alpha variable 8-2 [Source:HGNC Symbol;Acc:HGNC:12147] [ENST00000390434]                                                  | miscellaneous         | 4.76E-09 | 1.41E-04          | up                                   | 6.51        | Not used            |
| A_24_P366457   | not provided                                                                                                                              | unannotated probe     | 1.36E-06 | 3.87E-02          | down                                 | -2.82       | Not used            |
| A_24_P41149    | not provided                                                                                                                              | unannotated probe     | 1.54E-06 | 4.37E-02          | down                                 | -5.44       | Not used            |
| A_24_P418189   | ribosomal protein S4X pseudogene 13 [Source:HGNC Symbol;Acc:HGNC:36522] [ENST00000483219]                                                 | pseudogene            | 3.97E-07 | 1.15E-02          | down                                 | -4.06       | Not used            |
| A_24_P58308    | ribosomal protein S15a pseudogene 11 [Source:HGNC Symbol;Acc:HGNC:36707] [ENST00000594193]                                                | pseudogene            | 1.49E-06 | 4.23E-02          | down                                 | -1.51       | Not used            |
| A_24_P58994    | NOP56 ribonucleoprotein pseudogene 2 [Source:HGNC Symbol;Acc:HGNC:49800] [ENST00000447491]                                                | pseudogene            | 7.04E-07 | 2.02E-02          | down                                 | -4.44       | Not used            |
| A_24_P631848   | not provided                                                                                                                              | unannotated probe     | 4.67E-07 | 1.35E-02          | down                                 | -5.32       | Not used            |
| A_24_P727375   | zinc finger protein 720 pseudogene 1 [Source:HGNC Symbol;Acc:HGNC:34505] [ENST00000562403]                                                | pseudogene            | 5.28E-07 | 1.52E-02          | down                                 | -6.27       | Not used            |
| A_24_P743672   | GB                                                                                                                                        | unannotated probe     | 1.25E-07 | 3.64E-03          | down                                 | -3.20       | Not used            |
| A_24_P7934     | not provided                                                                                                                              | unannotated probe     | 1.30E-06 | 3.69E-02          | up                                   | 1.62        | Not used            |
| A_24_P84781    | Homo sapiens cDNA FLJ11871 fis, clone HEMBA1007052. [AK021933]                                                                            | miscellaneous         | 2.62E-08 | 7.74E-04          | down                                 | -2.74       | Not used            |
| A_24_P93452    | ribosomal protein L5 pseudogene 30 [Source:HGNC Symbol;Acc:HGNC:35837] [ENST00000465511]                                                  | pseudogene            | 8.23E-07 | 2.36E-02          | down                                 | -7.62       | Not used            |
| A_32_P200237   | ens                                                                                                                                       | unannotated probe     | 1.61E-06 | 4.57E-02          | down                                 | -2.25       | Not used            |
| A_32_P874898   | T cell receptor beta variable 5-1 [Source:HGNC Symbol;Acc:HGNC:12218] [ENST00000390381]                                                   | miscellaneous         | 2.21E-10 | 6.65E-06          | up                                   | 9.25        | Not used            |
| A_32_P93036    | Synthetic construct Homo sapiens gateway clone IMAGE:100023427 3' read APOE mRNA. [CU678501]                                              | miscellaneous         | 7.01E-07 | 2.01E-02          | down                                 | -2.37       | Not used            |
| A_33_P3211965  | UI-E-EJO-ahi-b-22-0-UI.s1 UI-E-EJO Homo sapiens cDNA clone UI-E-EJO-ahi-b-22-0-UI 3', mRNA sequence [BM674043]                            | miscellaneous         | 6.62E-07 | 1.90E-02          | down                                 | -2.20       | Not used            |
| A_33_P3213134  | not provided                                                                                                                              | unannotated probe     | 1.45E-06 | 4.14E-02          | down                                 | -2.95       | Not used            |
| A_33_P3214042  | not provided                                                                                                                              | unannotated probe     | 2.05E-07 | 5.97E-03          | down                                 | -2.53       | Not used            |
| A_33_P3218564  | not provided                                                                                                                              | unannotated probe     | 1.38E-11 | 4.17E-07          | down                                 | -4.92       | Not used            |
| A_33_P3219682  | ys87g09.r1 Soares melanocyte 2NbhM Homo sapiens cDNA clone IMAGE:268768 5', mRNA sequence [N35358]                                        | miscellaneous         | 5.02E-08 | 1.48E-03          | down                                 | -2.22       | Not used            |
| A_33_P3220015  | T cell receptor gamma variable 10 (non-functional) [Source:HGNC Symbol;Acc:HGNC:12285] [ENST00000390341]                                  | miscellaneous         | 2.56E-09 | 7.64E-05          | up                                   | 12.55       | Not used            |
| A_33_P3221134  | not provided                                                                                                                              | unannotated probe     | 4.32E-09 | 1.28E-04          | up                                   | 10.99       | Not used            |
| A_33_P3221828  | Homo sapiens cDNA FLJ31666 fis, clone NTZR12004783. [AK056228]                                                                            | miscellaneous         | 1.59E-07 | 4.64E-03          | down                                 | -2.38       | Not used            |
| A_33_P3224882  | T cell receptor gamma variable 9 [Source:HGNC Symbol;Acc:HGNC:12295] [ENST00000444775]                                                    | miscellaneous         | 2.57E-09 | 7.67E-05          | up                                   | 8.24        | Not used            |
| A_33_P3224971  | not provided                                                                                                                              | unannotated probe     | 5.89E-07 | 1.70E-02          | down                                 | -3.48       | Not used            |
| A_33_P3230037  | Homo sapiens FKSG58 (FKSG58) mRNA, complete cds. [AF336885]                                                                               | miscellaneous         | 1.30E-08 | 3.84E-04          | down                                 | -3.07       | Not used            |
| A_33_P3230073  | ribosomal protein L4 pseudogene 2 [Source:HGNC Symbol;Acc:HGNC:36836] [ENST00000447259]                                                   | pseudogene            | 3.02E-07 | 8.75E-03          | down                                 | -4.65       | Not used            |
| A_33_P3232688  | colony stimulating factor 2 receptor, alpha, low-affinity (granulocyte-macrophage) [Source:HGNC Symbol;Acc:HGNC:2435] [ENST00000381524]   | miscellaneous         | 2.08E-13 | 6.31E-09          | up                                   | 24.12       | Not used            |
| A_33_P3233030  | not provided                                                                                                                              | unannotated probe     |          |                   |                                      |             |                     |

| Gene Symbol   | Description                                                                                                                | Feature Type      | p-value  | Corrected p-value | Regulation in NOTCH1-mut (Mut vs WT) | Fold change | Position in Heatmap |
|---------------|----------------------------------------------------------------------------------------------------------------------------|-------------------|----------|-------------------|--------------------------------------|-------------|---------------------|
| A_33_P3246995 | not provided                                                                                                               | unannotated probe | 1.64E-06 | 4.67E-02          | down                                 | -2.79       | Not used            |
| A_33_P3247210 | not provided                                                                                                               | unannotated probe | 1.38E-07 | 4.03E-03          | down                                 | -1.96       | Not used            |
| A_33_P3256031 | T cell receptor beta variable 4-1 [Source:HGNC Symbol;Acc:HGNC:12215] [ENST00000390357]                                    | miscellaneous     | 9.64E-08 | 2.82E-03          | up                                   | 6.81        | Not used            |
| A_33_P3260021 | not provided                                                                                                               | unannotated probe | 3.92E-07 | 1.13E-02          | down                                 | -2.57       | Not used            |
| A_33_P3261433 | not provided                                                                                                               | unannotated probe | 2.01E-07 | 5.84E-03          | down                                 | -2.64       | Not used            |
| A_33_P3264416 | T cell receptor beta variable 18 [Source:HGNC Symbol;Acc:HGNC:12193] [ENST00000611520]                                     | miscellaneous     | 3.61E-07 | 1.04E-02          | up                                   | 4.93        | Not used            |
| A_33_P3265467 | growth differentiation factor 5 opposite strand [Source:HGNC Symbol;Acc:HGNC:33435] [ENST00000374375]                      | miscellaneous     | 1.22E-08 | 3.61E-04          | down                                 | -2.33       | Not used            |
| A_33_P3266091 | not provided                                                                                                               | unannotated probe | 1.42E-08 | 4.20E-04          | down                                 | -3.26       | Not used            |
| A_33_P3266614 | not provided                                                                                                               | unannotated probe | 5.96E-09 | 1.77E-04          | down                                 | -8.77       | Not used            |
| A_33_P3266848 | olfactory receptor, family 5, subfamily BS, member 1 pseudogene [Source:HGNC Symbol;Acc:HGNC:19627] [ENST00000328207]      | pseudogene        | 5.71E-07 | 1.64E-02          | down                                 | -2.78       | Not used            |
| A_33_P3268167 | not provided                                                                                                               | unannotated probe | 2.66E-07 | 7.71E-03          | down                                 | -3.17       | Not used            |
| A_33_P3271126 | not provided                                                                                                               | unannotated probe | 6.54E-11 | 1.97E-06          | down                                 | -7.65       | Not used            |
| A_33_P3273399 | UI-E-EJ0-aho-h-10-0-UI.s1 UI-E-EJ0 Homo sapiens cDNA clone UI-E-EJ0-aho-h-10-0-UI s1, mRNA sequence [BU739610]             | miscellaneous     | 5.46E-07 | 1.57E-02          | down                                 | -3.43       | Not used            |
| A_33_P3274009 | SLIT-ROBO Rho GTPase activating protein 2 [Source:HGNC Symbol;Acc:HGNC:19751] [ENST00000624686]                            | miscellaneous     | 1.24E-10 | 3.72E-06          | down                                 | -4.76       | Not used            |
| A_33_P3276520 | Homo sapiens cDNA FLJ41710 fis, clone HLUNG2011041. [AK123704]                                                             | miscellaneous     | 1.40E-06 | 3.98E-02          | down                                 | -3.56       | Not used            |
| A_33_P3277805 | not provided                                                                                                               | unannotated probe | 7.23E-09 | 2.15E-04          | down                                 | -13.20      | Not used            |
| A_33_P3283061 | Homo sapiens cDNA FLJ46249 fis, clone TESTI401377. [AK128128]                                                              | miscellaneous     | 1.25E-06 | 3.55E-02          | down                                 | -2.62       | Not used            |
| A_33_P3284854 | Homo sapiens cDNA FLJ46084 fis, clone TESTI2006543. [AK127969]                                                             | miscellaneous     | 3.94E-08 | 1.13E-03          | down                                 | -2.87       | Not used            |
| A_33_P3285764 | not provided                                                                                                               | unannotated probe | 2.16E-13 | 6.53E-09          | up                                   | 37.93       | Not used            |
| A_33_P3287636 | T cell receptor alpha variable 21 [Source:HGNC Symbol;Acc:HGNC:12118] [ENST00000390449]                                    | miscellaneous     | 1.55E-07 | 4.55E-03          | down                                 | -2.38       | Not used            |
| A_33_P3287716 | Homo sapiens cDNA FLJ46168 fis, clone TESTI003279. [AK128048]                                                              | miscellaneous     | 1.31E-06 | 3.73E-02          | down                                 | -3.31       | Not used            |
| A_33_P3289660 | Homo sapiens mRNA; cDNA DKFZp686G10213 (from clone DKFZp686G10213). [BX648603]                                             | miscellaneous     | 3.41E-08 | 1.01E-03          | down                                 | -2.63       | Not used            |
| A_33_P3289976 | not provided                                                                                                               | unannotated probe | 3.82E-12 | 1.15E-07          | down                                 | -5.20       | Not used            |
| A_33_P3290853 | T cell receptor beta variable 11-2 [Source:HGNC Symbol;Acc:HGNC:12181] [ENST00000471935]                                   | miscellaneous     | 2.04E-11 | 6.14E-07          | up                                   | 7.68        | Not used            |
| A_33_P3291329 | not provided                                                                                                               | unannotated probe | 9.55E-07 | 2.73E-02          | down                                 | -2.05       | Not used            |
| A_33_P3292241 | not provided                                                                                                               | unannotated probe | 1.56E-07 | 4.54E-03          | down                                 | -2.01       | Not used            |
| A_33_P3298552 | not provided                                                                                                               | unannotated probe | 4.78E-07 | 1.38E-02          | down                                 | -2.11       | Not used            |
| A_33_P3298771 | olfactory receptor, family 52, subfamily L, member 2 pseudogene [Source:HGNC Symbol;Acc:HGNC:14788] [ENST00000572217]      | pseudogene        | 1.49E-08 | 4.41E-04          | down                                 | -4.08       | Not used            |
| A_33_P3302070 | GB                                                                                                                         | unannotated probe | 1.21E-06 | 3.44E-02          | down                                 | -3.45       | Not used            |
| A_33_P3303394 | not provided                                                                                                               | unannotated probe | 6.98E-10 | 2.09E-05          | down                                 | -3.59       | Not used            |
| A_33_P3303469 | not provided                                                                                                               | unannotated probe | 7.13E-07 | 2.05E-02          | down                                 | -2.51       | Not used            |
| A_33_P3309656 | not provided                                                                                                               | unannotated probe | 2.97E-07 | 8.62E-03          | down                                 | -2.74       | Not used            |
| A_33_P3312799 | Q9UMX8_HUMAN (Q9UMX8) Melanoma antigen, complete [THC2774746]                                                              | miscellaneous     | 7.09E-07 | 2.04E-02          | down                                 | -3.49       | Not used            |
| A_33_P3313640 | not provided                                                                                                               | unannotated probe | 7.45E-08 | 2.19E-03          | down                                 | -4.33       | Not used            |
| A_33_P3314481 | T cell receptor alpha variable 19 [Source:HGNC Symbol;Acc:HGNC:12115] [ENST00000390447]                                    | miscellaneous     | 8.42E-08 | 2.47E-03          | up                                   | 6.32        | Not used            |
| A_33_P3316093 | not provided                                                                                                               | unannotated probe | 7.70E-08 | 2.26E-03          | down                                 | -4.34       | Not used            |
| A_33_P3316696 | not provided                                                                                                               | unannotated probe | 1.48E-07 | 4.32E-03          | down                                 | -2.89       | Not used            |
| A_33_P3317431 | ribosomal protein L7 pseudogene 59 [Source:HGNC Symbol;Acc:HGNC:49215] [ENST00000447700]                                   | pseudogene        | 9.51E-07 | 2.72E-02          | down                                 | -2.16       | Not used            |
| A_33_P3317473 | not provided                                                                                                               | unannotated probe | 4.61E-08 | 1.36E-03          | down                                 | -3.20       | Not used            |
| A_33_P3318504 | Homo sapiens mRNA for putative protein product of Nbla11895, complete cds. [AB072904]                                      | miscellaneous     | 4.06E-07 | 1.17E-02          | down                                 | -2.44       | Not used            |
| A_33_P3319937 | not provided                                                                                                               | unannotated probe | 3.23E-10 | 9.68E-06          | down                                 | -5.76       | Not used            |
| A_33_P3321372 | contactin associated protein-like 3B [Source:HGNC Symbol;Acc:HGNC:32035] [ENST00000276974]                                 | miscellaneous     | 6.67E-15 | 2.03E-10          | up                                   | 97.88       | Not used            |
| A_33_P3321682 | not provided                                                                                                               | unannotated probe | 9.05E-10 | 2.71E-05          | down                                 | -5.88       | Not used            |
| A_33_P3323486 | Synthetic construct DNA, clone: pF1KE0827                                                                                  | miscellaneous     | 4.58E-08 | 1.35E-03          | down                                 | -4.15       | Not used            |
| A_33_P3325102 | BCO20650 SEC3L1 protein (Homo sapiens) [exp=-1; wpp=0; cg=0], partial (18%) [THC2739440]                                   | miscellaneous     | 1.69E-06 | 4.80E-02          | down                                 | -2.27       | Not used            |
| A_33_P3326817 | not provided                                                                                                               | unannotated probe | 7.03E-07 | 2.02E-02          | down                                 | -5.27       | Not used            |
| A_33_P3328973 | Homo sapiens cDNA FLJ26054 fis, clone PRS03205. [AK129565]                                                                 | miscellaneous     | 1.82E-07 | 5.31E-03          | down                                 | -2.92       | Not used            |
| A_33_P3329104 | not provided                                                                                                               | unannotated probe | 6.82E-07 | 1.96E-02          | down                                 | -4.17       | Not used            |
| A_33_P3329737 | T cell receptor beta variable 19 [Source:HGNC Symbol;Acc:HGNC:12194] [ENST00000390393]                                     | miscellaneous     | 2.28E-11 | 6.86E-07          | up                                   | 7.21        | Not used            |
| A_33_P3331326 | not provided                                                                                                               | unannotated probe | 6.98E-08 | 2.05E-03          | down                                 | -3.09       | Not used            |
| A_33_P3331791 | not provided                                                                                                               | unannotated probe | 4.38E-08 | 1.29E-03          | down                                 | -2.80       | Not used            |
| A_33_P3333485 | not provided                                                                                                               | unannotated probe | 2.64E-07 | 7.67E-03          | down                                 | -2.73       | Not used            |
| A_33_P3335401 | not provided                                                                                                               | unannotated probe | 1.40E-06 | 3.98E-02          | down                                 | -2.70       | Not used            |
| A_33_P3336567 | not provided                                                                                                               | unannotated probe | 4.28E-08 | 1.26E-03          | down                                 | -3.18       | Not used            |
| A_33_P3337742 | not provided                                                                                                               | unannotated probe | 4.05E-07 | 1.17E-02          | down                                 | -4.12       | Not used            |
| A_33_P3338071 | not provided                                                                                                               | unannotated probe | 4.65E-09 | 1.38E-04          | up                                   | 14.37       | Not used            |
| A_33_P3338292 | not provided                                                                                                               | unannotated probe | 3.10E-09 | 9.23E-05          | down                                 | -4.00       | Not used            |
| A_33_P3339197 | not provided                                                                                                               | unannotated probe | 4.61E-08 | 1.36E-03          | down                                 | -3.78       | Not used            |
| A_33_P3341568 | not provided                                                                                                               | unannotated probe | 1.14E-06 | 3.25E-02          | down                                 | -2.16       | Not used            |
| A_33_P3341722 | Synthetic construct Homo sapiens gateway clone IMAGE:100021085 5' read COL23A1 mRNA. [CU692082]                            | miscellaneous     | 4.06E-07 | 1.17E-02          | down                                 | -1.93       | Not used            |
| A_33_P3347522 | not provided                                                                                                               | unannotated probe | 2.69E-08 | 7.94E-04          | down                                 | -3.22       | Not used            |
| A_33_P3349252 | Homo sapiens mRNA; cDNA DKFZp547L112 (from clone DKFZp547L112). [AL512723]                                                 | miscellaneous     | 9.01E-09 | 2.67E-04          | down                                 | -5.23       | Not used            |
| A_33_P3350452 | ribosomal protein L15 pseudogene 20 [Source:HGNC Symbol;Acc:HGNC:36130] [ENST00000482912]                                  | pseudogene        | 1.70E-07 | 4.97E-03          | down                                 | -4.12       | Not used            |
| A_33_P3352407 | ferritin, heavy polypeptide 1 pseudogene 20 [Source:HGNC Symbol;Acc:HGNC:37639] [ENST00000434913]                          | pseudogene        | 2.31E-09 | 6.89E-05          | up                                   | 2.56        | Not used            |
| A_33_P3352980 | not provided                                                                                                               | unannotated probe | 2.93E-07 | 8.49E-03          | down                                 | -2.71       | Not used            |
| A_33_P3353906 | not provided                                                                                                               | unannotated probe | 1.40E-08 | 4.16E-04          | down                                 | -3.93       | Not used            |
| A_33_P3358855 | not provided                                                                                                               | unannotated probe | 4.47E-07 | 1.29E-02          | down                                 | -4.51       | Not used            |
| A_33_P3360886 | GRP33_ARTSA [P13230] Glycine-rich protein GRP33, partial (8%) [THC2642603]                                                 | miscellaneous     | 1.43E-07 | 4.17E-03          | down                                 | -2.24       | Not used            |
| A_33_P3362274 | T cell receptor alpha variable 8-7 (non-functional) [Source:HGNC Symbol;Acc:HGNC:12152] [ENST00000390456]                  | miscellaneous     | 1.55E-08 | 4.57E-04          | down                                 | -2.71       | Not used            |
| A_33_P3365963 | not provided                                                                                                               | unannotated probe | 2.90E-11 | 8.73E-07          | down                                 | -11.85      | Not used            |
| A_33_P3371142 | not provided                                                                                                               | unannotated probe | 9.39E-07 | 2.69E-02          | down                                 | -8.62       | Not used            |
| A_33_P3371144 | not provided                                                                                                               | unannotated probe | 1.05E-14 | 3.19E-10          | down                                 | -7.97       | Not used            |
| A_33_P3372189 | Homo sapiens, Similar to LOC223018, clone IMAGE:4732541, mRNA. [BC029410]                                                  | miscellaneous     | 2.96E-07 | 8.60E-03          | up                                   | 1.89        | Not used            |
| A_33_P3374215 | not provided                                                                                                               | unannotated probe | 1.16E-07 | 3.38E-03          | down                                 | -2.73       | Not used            |
| A_33_P3374589 | TRNT1_HUMAN (Q96Q11) tRNA-nucleotidyltransferase 1, mitochondrial precursor                                                | miscellaneous     | 1.41E-06 | 4.01E-02          | down                                 | -2.16       | Not used            |
| A_33_P3376273 | not provided                                                                                                               | unannotated probe | 5.13E-07 | 1.48E-02          | up                                   | 4.24        | Not used            |
| A_33_P3382105 | not provided                                                                                                               | unannotated probe | 6.29E-07 | 1.81E-02          | down                                 | -2.03       | Not used            |
| A_33_P3382769 | ubiquitin-conjugating enzyme E2Q family member 2 pseudogene 2 [Source:HGNC Symbol;Acc:HGNC:37440] [ENST00000561287]        | pseudogene        | 5.39E-07 | 1.55E-02          | down                                 | -2.45       | Not used            |
| A_33_P3383287 | Homo sapiens HDCMB45P mRNA, partial cds. [AF068294]                                                                        | miscellaneous     | 3.71E-07 | 1.07E-02          | down                                 | -3.15       | Not used            |
| A_33_P3383531 | not provided                                                                                                               | unannotated probe | 1.13E-06 | 3.23E-02          | down                                 | -3.65       | Not used            |
| A_33_P3385387 | ribosomal protein L18 pseudogene 13 [Source:HGNC Symbol;Acc:HGNC:35599] [ENST00000478088]                                  | pseudogene        | 9.60E-08 | 2.81E-03          | down                                 | -2.75       | Not used            |
| A_33_P3385561 | Homo sapiens cDNA FLJ27422 fis, clone WMC08087. [AK130932]                                                                 | miscellaneous     | 1.62E-07 | 4.72E-03          | down                                 | -2.90       | Not used            |
| A_33_P3385662 | golgin A8 family, member V, pseudogene [Source:HGNC Symbol;Acc:HGNC:49920] [ENST00000559009]                               | pseudogene        | 2.06E-07 | 6.01E-03          | down                                 | -2.39       | Not used            |
| A_33_P3385988 | tubulin tyrosine ligase-like family, member 8 [Source:HGNC Symbol;Acc:HGNC:34000] [ENST00000266182]                        | miscellaneous     | 2.16E-09 | 6.45E-05          | down                                 | -3.84       | Not used            |
| A_33_P3389578 | not provided                                                                                                               | unannotated probe | 2.62E-08 | 7.74E-04          | down                                 | -4.41       | Not used            |
| A_33_P3393901 | DA197111 BRASW1 Homo sapiens cDNA clone BRASW1000106 5', mRNA sequence [DA197111]                                          | miscellaneous     | 2.92E-07 | 8.47E-03          | down                                 | -2.68       | Not used            |
| A_33_P3395237 | eukaryotic translation initiation factor 3, subunit K pseudogene 1 [Source:HGNC Symbol;Acc:HGNC:44016] [ENST00000513279]   | pseudogene        | 7.24E-07 | 2.08E-02          | down                                 | -2.78       | Not used            |
| A_33_P3395314 | not provided                                                                                                               | unannotated probe | 1.61E-08 | 4.76E-04          | up                                   | 23.33       | Not used            |
| A_33_P3395636 | ribosomal L24 domain containing 1 pseudogene 3 [Source:HGNC Symbol;Acc:HGNC:37883] [ENST00000449255]                       | pseudogene        | 8.05E-07 | 2.31E-02          | down                                 | -9.99       | Not used            |
| A_33_P3397127 | Homo sapiens mRNA for T cell receptor beta variable 6, partial cds, clone: un 226. [AB306238]                              | miscellaneous     | 1.92E-09 | 5.72E-05          | up                                   | 6.73        | Not used            |
| A_33_P3398005 | not provided                                                                                                               | unannotated probe | 9.38E-08 | 2.75E-03          | down                                 | -2.14       | Not used            |
| A_33_P3401084 | not provided                                                                                                               | unannotated probe | 1.98E-07 | 5.78E-03          | down                                 | -2.61       | Not used            |
| A_33_P3407374 | not provided                                                                                                               | unannotated probe | 1.25E-08 | 3.69E-04          | down                                 | -3.12       | Not used            |
| A_33_P3407601 | Q39AC8_BUR53 (Q39AC8) Cytochrome b561, partial (9%) [THC2753069]                                                           | miscellaneous     | 2.36E-07 | 6.85E-03          | down                                 | -5.85       | Not used            |
| A_33_P3407826 | not provided                                                                                                               | unannotated probe | 2.28E-07 | 6.64E-03          | down                                 | -3.06       | Not used            |
| A_33_P3408665 | not provided                                                                                                               | unannotated probe | 9.99E-11 | 3.00E-06          | down                                 | -3.92       | Not used            |
| A_33_P3412716 | ribosomal protein L17 pseudogene 22 [Source:HGNC Symbol;Acc:HGNC:35761] [ENST00000467688]                                  | pseudogene        | 2.47E-07 | 7.16E-03          | down                                 | -4.40       | Not used            |
| A_33_P3414017 | not provided                                                                                                               | unannotated probe | 3.94E-08 | 1.16E-03          | down                                 | -9.14       | Not used            |
| A_33_P3414228 | not provided                                                                                                               | unannotated probe | 8.83E-08 | 2.59E-03          | down                                 | -4.30       | Not used            |
| A_33_P3420810 | not provided                                                                                                               | unannotated probe | 4.30E-07 | 1.24E-02          | down                                 | -2.83       | Not used            |
| A_33_P3420914 | chondroitin sulfate proteoglycan 4 pseudogene 8 [Source:HGNC Symbol;Acc:HGNC:48359] [ENST00000456932]                      | pseudogene        | 5.88E-07 | 1.69E-02          | down                                 | -2.38       | Not used            |
| A_33_P3421108 | PREDICTED: Homo sapiens ADP-ribosylation factor-like 13A (ARL13A), transcript variant X2, mRNA [XM_006724649]              | miscellaneous     | 3.70E-08 | 1.09E-03          | down                                 | -10.10      | Not used            |
| A_33_P3422265 | Homo sapiens cDNA FLJ43050 fis, clone BRTHA3005046. [AK125040]                                                             | miscellaneous     | 1.86E-08 | 5.49E-04          | down                                 | -2.07       | Not used            |
| A_33_P3424153 | not provided                                                                                                               | unannotated probe | 8.15E-07 | 2.34E-02          | down                                 | -3.69       | Not used            |
| A_33_P3424867 | not provided                                                                                                               | unannotated probe | 1.04E-06 | 2.98E-02          | down                                 | -3.15       | Not used            |
| A_33_P3605969 | Homo sapiens cDNA clone IMAGE:3936577, **** WARNING: chimeric clone ****. [BC071847]                                       | miscellaneous     | 1.58E-08 | 4.68E-04          | down                                 | -2.87       | Not used            |
| A_33_P3609431 | Homo sapiens cDNA FLJ45949 fis, clone PLACE7007973. [AK127846]                                                             | miscellaneous     | 6.22E-07 | 9.34E-03          | down                                 | -2.61       | Not used            |
| A2M-AS1       | Homo sapiens A2M antisense RNA 1 (head to head) (A2M-AS1), long non-coding RNA [NR_026971]                                 | ncRNA             | 3.67E-10 | 2.00E-05          | up                                   | 8.02        | Not used            |
| AAK1          | Homo sapiens AP2 associated kinase 1 (AAK1), mRNA [NM_014911]                                                              | gene              | 1.37E-13 | 4.14E-09          | up                                   | 23.56       | 559                 |
| AAK1          | AP2 associated kinase 1 [Source:HGNC Symbol;Acc:HGNC:19679] [ENST00000406297]                                              | gene              | 8.08E-08 | 2.37E-03          | up                                   | 11.82       | Not used            |
| AAK1          | Homo sapiens AP2 associated kinase 1 (AAK1), mRNA [NM_014911]                                                              | gene              | 2.41E-10 | 7.25E-06          | up                                   | 8.28        | Not used            |
| AAK1          | Homo sapiens AP2 associated kinase 1 (AAK1), mRNA [NM_014911]                                                              | gene              | 4.37E-14 | 1.33E-09          | up                                   | 6.99        | Not used            |
| AAK1          | Homo sapiens cDNA clone IMAGE:5226225. [BC090950]                                                                          | miscellaneous     | 2.66E-10 | 7.99E-06          | up                                   | 4.08        | Not used            |
| AATK          | Homo sapiens apoptosis-associated tyrosine kinase (AATK), transcript variant 1, mRNA [NM_001080395]                        | gene              | 6.26E-07 | 1.80E-02          | up                                   | 75          | 86                  |
| AATK          | apoptosis-associated tyrosine kinase [Source:HGNC Symbol;Acc:HGNC:211] [ENST00000572798]                                   | gene              | 1.60E-06 | 4.54E-02          | down                                 | -2.83       | Not used            |
| ABCA13        | Homo sapiens ATP-binding cassette, sub-family A (ABC1), member 13 (ABCA13), mRNA [NM_152701]                               | gene              | 1.62E-06 | 4.61E-02          | down                                 | 6.10        | 211                 |
| ABCC10        | Homo sapiens ATP-binding cassette, sub-family C (CFTR/MRP), member 10 (ABCC10), transcript variant MRP7A, mRNA [NM_033450] | gene              | 1.28E-09 | 3.82E-05          | down                                 | -2.49       | 908                 |
| ABCC3         | Homo sapiens ATP-binding cassette, sub-family C (CFTR/MRP), member 3 (ABCC3), transcript variant 1, mRNA [NM_003786]       | gene              | 1.42E-08 | 4.21E-04          | up                                   | 11.27       | 241                 |
| ABCC6         | Homo sapiens ATP-binding cassette, sub-family C (CFTR/MRP), member 6 (ABCC6), transcript variant 1, mRNA [NM_001079528]    | gene              | 1.28E-09 | 3.82E-05          | up                                   | 6.28        | 501                 |
| ABCC6         | Homo sapiens ATP-binding cassette, sub-family C (CFTR/MRP), member 6 (ABCC6), transcript variant 2, mRNA [NM_001079528]    | gene              | 5.72E-11 | 2.19E-06          | up                                   | 3.50        | Not used            |
| ABHD2         | Homo sapiens abhydrolase domain containing 2 (ABHD2), transcript variant 1, mRNA [NM_007011]                               | gene              | 2.14E-08 | 1.51E-03          | up                                   | 4.91        |                     |

| Gene Symbol | Description                                                                                                                            | Feature Type | p-value  | Corrected p-value | Regulation in NOTCH1-mut | Fold change (Mut vs WT) | Position in Heatmap |
|-------------|----------------------------------------------------------------------------------------------------------------------------------------|--------------|----------|-------------------|--------------------------|-------------------------|---------------------|
| ACTN1       | Homo sapiens actinin, alpha 1 (ACTN1), transcript variant 2, mRNA [NM_001102]                                                          | gene         | 6.61E-13 | 2.00E-08          | up                       | 70.77                   | 78                  |
| ACTN4       | Homo sapiens actinin, alpha 4 (ACTN4), mRNA [NM_004924]                                                                                | gene         | 7.93E-07 | 2.27E-02          | up                       | 2.40                    | 417                 |
| ACVR1C      | Homo sapiens activin A receptor, type IC (ACVR1C), transcript variant 1, mRNA [NM_145259]                                              | gene         | 5.57E-14 | 1.69E-09          | up                       | 9.59                    | 366                 |
| ADAM33      | Homo sapiens ADAM metalloproteinase domain 33 (ADAM33), transcript variant 1, mRNA [NM_025220]                                         | gene         | 1.62E-07 | 4.73E-03          | down                     | -2.16                   | 894                 |
| ADAM8       | Homo sapiens ADAM metalloproteinase domain 8 (ADAM8), transcript variant 1, mRNA [NM_001109]                                           | gene         | 2.02E-08 | 5.97E-04          | up                       | 7.05                    | 672                 |
| ADAMTS10    | Homo sapiens ADAM metalloproteinase with thrombospondin type 1 motif, 10 (ADAMTS10), transcript variant 1, mRNA [NM_030957]            | gene         | 7.20E-08 | 2.11E-03          | up                       | 9.37                    | 581                 |
| ADAMTS7P1   | Homo sapiens ADAMTS7 pseudogene 1 (ADAMTS7P1), non-coding RNA [NR_045529]                                                              | gene         | 6.21E-07 | 1.79E-02          | down                     | -2.66                   | 899                 |
| ADAMTSL4    | Homo sapiens ADAMTS-like 4 (ADAMTSL4), transcript variant 2, mRNA [NM_025008]                                                          | gene         | 3.14E-08 | 9.26E-04          | up                       | 3.48                    | 388                 |
| ADAMTSL5    | Homo sapiens ADAMTS-like 5 (ADAMTSL5), mRNA [NM_213604]                                                                                | gene         | 1.78E-10 | 5.35E-06          | down                     | -9.39                   | 841                 |
| ADCYAP1R1   | Homo sapiens adenylyl cyclase activating polypeptide 1 (pituitary) receptor type I (ADCYAP1R1), transcript variant 3, mRNA [NM_001118] | gene         | 4.78E-07 | 1.38E-02          | down                     | -2.22                   | 937                 |
| ADRB1       | Homo sapiens adrenoceptor beta 1 (ADRB1), mRNA [NM_000684]                                                                             | gene         | 4.15E-07 | 1.20E-02          | up                       | 7.85                    | 804                 |
| AGAP1       | Homo sapiens ArfGAP with GTPase domain, ankyrin repeat and PH domain 1 (AGAP1), transcript variant 1, mRNA [NM_001037131]              | gene         | 8.86E-07 | 2.54E-02          | up                       | 3.19                    | 382                 |
| AGBL3       | Homo sapiens ATP/GTP binding protein-like 3 (AGBL3), mRNA [NM_178563]                                                                  | gene         | 1.23E-06 | 3.50E-02          | down                     | -2.19                   | 905                 |
| AGBL4       | Homo sapiens ATP/GTP binding protein-like 4 (AGBL4), mRNA [NM_032785]                                                                  | gene         | 2.30E-07 | 6.67E-03          | down                     | -4.29                   | 1173                |
| AGPAT9      | Homo sapiens 1-acylglycerol-3-phosphate O-acyltransferase 9 (AGPAT9), transcript variant 1, mRNA [NM_032717]                           | gene         | 2.22E-09 | 6.63E-05          | up                       | 36.52                   | 603                 |
| AGTPBP1     | Homo sapiens ATP/GTP binding protein 1 (AGTPBP1), transcript variant 2, mRNA [NM_015239]                                               | gene         | 1.42E-07 | 4.14E-03          | up                       | 2.82                    | 438                 |
| AGTRAP      | Homo sapiens angiotensin II receptor-associated protein (AGTRAP), transcript variant 4, mRNA [NM_001040196]                            | gene         | 1.92E-07 | 5.59E-03          | up                       | 11.61                   | 652                 |
| AIDA        | axin interactor, dorsalization associated [Source:HGNC Symbol;Acc:HGNC:25761] [ENST00000474863]                                        | gene         | 4.92E-07 | 1.42E-02          | down                     | -3.68                   | 1254                |
| AIF1        | Homo sapiens allograft inflammatory factor 1 (AIF1), transcript variant 2, mRNA [NM_004047]                                            | gene         | 1.53E-12 | 4.43E-08          | up                       | 94.15                   | 495                 |
| AKR1C3      | Homo sapiens aldo-keto reductase family 1, member C3 (AKR1C3), transcript variant 1, mRNA [NM_003739]                                  | gene         | 4.48E-10 | 1.44E-05          | up                       | 19.20                   | 543                 |
| ALDH1A1     | Homo sapiens aldehyde dehydrogenase 1 family, member A1 (ALDH1A1), mRNA [NM_000689]                                                    | gene         | 1.67E-10 | 5.03E-06          | up                       | 25.24                   | 247                 |
| ALDH1A3     | PREDICTED: Homo sapiens uncharacterized LOC145757 (RP11-66824.1), transcript variant X1, misc. RNA [XR_092311]                         | gene         | 6.94E-09 | 2.06E-04          | down                     | -3.43                   | 1044                |
| ALDH1L1     | Homo sapiens aldehyde dehydrogenase 1 family, member L1 (ALDH1L1), transcript variant 2, mRNA [NM_021190]                              | gene         | 1.72E-07 | 5.02E-03          | down                     | -2.95                   | 1262                |
| ALDH2       | Homo sapiens aldehyde dehydrogenase 2 family (mitochondrial) (ALDH2), transcript variant 1, mRNA [NM_000690]                           | gene         | 9.03E-08 | 2.64E-03          | up                       | 7.22                    | 679                 |
| ALOX5AP     | Homo sapiens arachidonate 5-lipoxygenase-activating protein (ALOX5AP), transcript variant 1, mRNA [NM_001629]                          | gene         | 1.72E-06 | 4.88E-02          | up                       | 5.44                    | 648                 |
| ALS2CL      | Homo sapiens ALS2 C-terminal like (ALS2CL), transcript variant 1, mRNA [NM_147129]                                                     | gene         | 1.71E-06 | 4.86E-02          | down                     | -1.99                   | 1131                |
| AMICA1      | Homo sapiens adhesion molecule, interacts with CXADR antigen 1 (AMICA1), transcript variant 2, mRNA [NM_153206]                        | gene         | 6.85E-07 | 1.97E-02          | up                       | 61.41                   | 516                 |
| AMPD2       | Homo sapiens adenosine monophosphate deaminase 2 (AMPD2), transcript variant 1, mRNA [NM_004073]                                       | gene         | 2.45E-09 | 7.31E-05          | up                       | 7.49                    | 343                 |
| ANK3        | Homo sapiens ankyrin 3, node of Ranvier (ankyrin G) (ANK3), transcript variant 1, mRNA [NM_020987]                                     | gene         | 2.37E-10 | 7.12E-06          | up                       | 17.62                   | 522                 |
| ANKFY1      | Homo sapiens ankyrin repeat and FYVE domain containing 1 (ANKFY1), transcript variant 3, mRNA [NM_001257999]                           | gene         | 5.56E-07 | 1.60E-02          | down                     | -2.80                   | 885                 |
| ANKRD13B    | Homo sapiens ankyrin repeat domain 13B (ANKRD13B), mRNA [NM_152345]                                                                    | gene         | 1.28E-07 | 3.75E-03          | down                     | -2.12                   | 909                 |
| ANKRD42     | Homo sapiens ankyrin repeat domain 42 (ANKRD42), transcript variant 6, mRNA [NM_001300977]                                             | gene         | 2.18E-07 | 6.34E-03          | down                     | -1.68                   | 953                 |
| ANKRD45     | Homo sapiens ankyrin repeat domain 45 (ANKRD45), mRNA [NM_198493]                                                                      | gene         | 3.05E-08 | 8.99E-04          | down                     | -1.95                   | 1095                |
| ANKRD55     | Homo sapiens ankyrin repeat domain 55 (ANKRD55), mRNA [NM_024669]                                                                      | gene         | 9.09E-07 | 2.60E-02          | up                       | 6.97                    | 230                 |
| ANPEP       | Homo sapiens alanyl (membrane) aminopeptidase (ANPEP), mRNA [NM_001150]                                                                | gene         | 1.18E-09 | 3.52E-05          | up                       | 11.77                   | 601                 |
| ANXA1       | Homo sapiens annexin A1 (ANXA1), mRNA [NM_000700]                                                                                      | gene         | 2.38E-09 | 7.11E-05          | up                       | 97.53                   | 55                  |
| ANXA3       | Homo sapiens annexin A3 (ANXA3), mRNA [NM_005139]                                                                                      | gene         | 3.98E-15 | 1.21E-10          | up                       | 167.89                  | 61                  |
| AQAH        | Homo sapiens acylglyoxyl hydrolase (neutrophil) (AQAH), transcript variant 1, mRNA [NM_001637]                                         | gene         | 8.19E-10 | 2.45E-05          | up                       | 41.72                   | 556                 |
| AP152       | Homo sapiens adaptor-related protein complex 1, sigma 2 subunit (AP152), transcript variant 2, mRNA [NM_003916]                        | gene         | 3.00E-07 | 8.69E-03          | up                       | 7.03                    | 663                 |
| AP152       | Homo sapiens adaptor-related protein complex 1, sigma 2 subunit (AP152), transcript variant 1, mRNA [NM_003916]                        | gene         | 4.58E-07 | 1.32E-02          | up                       | 3.81                    | Not used            |
| APBA2       | amyloid beta (A4) precursor protein-binding, family A, member 2 [Source:HGNC Symbol;Acc:HGNC:579] [ENST00000382938]                    | gene         | 5.72E-09 | 1.70E-04          | up                       | 9.94                    | 363                 |
| APOBEC3A    | Homo sapiens apolipoprotein B mRNA editing enzyme, catalytic polypeptide-like 3A (APOBEC3A), transcript variant 1, mRNA [NM_145699]    | gene         | 2.08E-19 | 6.33E-15          | up                       | 900.10                  | 24                  |
| APOBEC3B    | Homo sapiens apolipoprotein B mRNA editing enzyme, catalytic polypeptide-like 3B (APOBEC3B), transcript variant 1, mRNA [NM_004900]    | gene         | 2.21E-12 | 6.68E-08          | up                       | 44.24                   | 80                  |
| APOBR       | Homo sapiens apolipoprotein B receptor (APOBR), mRNA [NM_018690]                                                                       | gene         | 2.39E-11 | 7.20E-07          | up                       | 83.44                   | 113                 |
| APOL6       | Homo sapiens apolipoprotein L 6 (APOL6), mRNA [NM_030641]                                                                              | gene         | 3.36E-07 | 9.64E-03          | up                       | 4.62                    | 381                 |
| AQP7P1      | Homo sapiens aquaporin 7 pseudogene 1 (AQP7P1), non-coding RNA [NR_002817]                                                             | gene         | 8.76E-07 | 2.51E-02          | down                     | -3.72                   | 1215                |
| AQP9        | Homo sapiens aquaporin 9 (AQP9), mRNA [NM_020980]                                                                                      | gene         | 1.85E-23 | 5.65E-19          | up                       | 1903.82                 | 5                   |
| ARAF2       | Homo sapiens raf-1 murine sarcoma 3611 viral oncogene homolog pseudogene, mRNA (cDNA clone IMAGE:5295529), [BC033982]                  | gene         | 1.00E-10 | 3.02E-06          | down                     | -3.45                   | 981                 |
| ARAP3       | Homo sapiens ArfGAP with RhoGAP domain, ankyrin repeat and PH domain 3 (ARAP3), mRNA [NM_022481]                                       | gene         | 9.25E-17 | 2.82E-12          | up                       | 349.83                  | 43                  |
| ARFRP1      | ADP-ribosylation factor related protein 1 [Source:HGNC Symbol;Acc:HGNC:662] [ENST00000612772]                                          | gene         | 6.35E-08 | 1.87E-03          | down                     | -1.95                   | 1080                |
| ARG1        | Homo sapiens arginase 1 (ARG1), transcript variant 1, mRNA [NM_001244438]                                                              | gene         | 1.89E-11 | 5.69E-07          | up                       | 57.05                   | 59                  |
| ARG1        | Homo sapiens arginase 1 (ARG1), transcript variant 1, mRNA [NM_001244438]                                                              | gene         | 1.47E-11 | 4.45E-07          | up                       | 48.50                   | Not used            |
| ARHGAP10    | Homo sapiens Rho GTPase activating protein 10 (ARHGAP10), mRNA [NM_024605]                                                             | gene         | 2.74E-10 | 8.22E-06          | up                       | 7.97                    | 722                 |
| ARHGAP26    | Homo sapiens Rho GTPase activating protein 26 (ARHGAP26), transcript variant 1, mRNA [NM_015071]                                       | gene         | 7.37E-10 | 2.21E-05          | up                       | 41.37                   | 552                 |
| ARHGAP33    | Homo sapiens Rho GTPase activating protein 33 (ARHGAP33), transcript variant 2, mRNA [NM_001172630]                                    | gene         | 1.30E-09 | 3.90E-05          | down                     | -7.10                   | 850                 |
| ARHGEF10    | Rho guanine nucleotide exchange factor (GEF) 10 [Source:HGNC Symbol;Acc:HGNC:14103] [ENST00000382795]                                  | gene         | 2.79E-07 | 8.10E-03          | down                     | -5.93                   | 1257                |
| ARHGEF28    | Homo sapiens Rho guanine nucleotide exchange factor (GEF) 28 (ARHGEF28), transcript variant 2, mRNA [NM_001177693]                     | gene         | 4.14E-08 | 1.22E-03          | down                     | -3.24                   | 1184                |
| ARHGEF40    | Homo sapiens Rho guanine nucleotide exchange factor (GEF) 40 (ARHGEF40), transcript variant 1, mRNA [NM_018071]                        | gene         | 4.71E-08 | 1.39E-03          | up                       | 26.08                   | 600                 |
| ARL5C       | Homo sapiens ADP-ribosylation factor-like 5C (ARL5C), mRNA [NM_001143968]                                                              | gene         | 2.70E-07 | 7.83E-03          | down                     | -2.72                   | 943                 |
| ARMCX4      | Homo sapiens armadillo repeat containing, X-linked 4 (ARMCX4), transcript variant 1, mRNA [NM_001256155]                               | gene         | 1.31E-06 | 3.72E-02          | down                     | -3.22                   | 1050                |
| ARPC2       | Homo sapiens actin related protein 2/3 complex, subunit 2, 34kDa (ARPC2), transcript variant 1, mRNA [NM_152862]                       | gene         | 4.54E-08 | 1.33E-03          | up                       | 2.18                    | 410                 |
| ARPC5       | Homo sapiens actin related protein 2/3 complex, subunit 5, 16kDa (ARPC5), transcript variant 2, mRNA [NM_001270439]                    | gene         | 3.64E-07 | 1.05E-02          | up                       | 8.17                    | 658                 |
| ARRB1       | Homo sapiens arrestin, beta 1 (ARRB1), transcript variant 1, mRNA [NM_004041]                                                          | gene         | 1.60E-11 | 4.81E-07          | up                       | 17.28                   | 750                 |
| ARRB2       | Homo sapiens arrestin, beta 2 (ARRB2), transcript variant 1, mRNA [NM_004313]                                                          | gene         | 2.85E-11 | 8.59E-07          | up                       | 5.11                    | 341                 |
| ASAH1       | Homo sapiens N-acylphosphingosine amidohydrolase (acid ceramidase) 1 (ASAH1), transcript variant 1, mRNA [NM_177924]                   | gene         | 4.14E-11 | 1.25E-06          | up                       | 3.64                    | 462                 |
| ASAP1       | Homo sapiens ArfGAP with SH3 domain, ankyrin repeat and PH domain 1 (ASAP1), transcript variant 2, mRNA [NM_001247996]                 | gene         | 8.36E-09 | 3.98E-04          | up                       | 3.63                    | 476                 |
| ASAP1-IT1   | Homo sapiens ASAP1 intronic transcript 1 (non-protein coding) (ASAP1-IT1), long non-coding RNA [NR_002765]                             | gene         | 1.56E-08 | 4.62E-04          | up                       | 5.00                    | 340                 |
| ASCL1       | Homo sapiens achaete-scute family bHLH transcription factor 2 (ASCL1), mRNA [NM_005170]                                                | gene         | 2.16E-07 | 6.28E-03          | up                       | 23.80                   | 768                 |
| ASGR1       | Homo sapiens asialoglycoprotein receptor 1 (ASGR1), transcript variant 1, mRNA [NM_001671]                                             | gene         | 3.08E-15 | 9.36E-11          | up                       | 43.61                   | 260                 |
| ASGR2       | Homo sapiens asialoglycoprotein receptor 2 (ASGR2), transcript variant H2, mRNA [NM_080912]                                            | gene         | 2.79E-13 | 8.44E-09          | up                       | 23.36                   | 288                 |
| ASIC2       | Homo sapiens acid sensing (proton gated) ion channel 2 (ASIC2), transcript variant MDEG2, mRNA [NM_183377]                             | gene         | 9.49E-08 | 2.78E-03          | down                     | -3.13                   | 1053                |
| ASIC4       | Homo sapiens acid sensing (proton gated) ion channel family member 4 (ASIC4), mRNA [NM_182847]                                         | gene         | 6.36E-07 | 1.83E-02          | down                     | -4.47                   | 1183                |
| ASPH        | Homo sapiens aspartate beta-hydroxylase (ASPH), transcript variant 4, mRNA [NM_032467]                                                 | gene         | 3.18E-11 | 9.58E-07          | up                       | 41.85                   | 37                  |
| ASPH        | Homo sapiens aspartate beta-hydroxylase (ASPH), transcript variant 1, mRNA [NM_004318]                                                 | gene         | 1.01E-09 | 3.03E-05          | up                       | 7.40                    | Not used            |
| ASPRV1      | Homo sapiens aspartic peptidase, retroviral-like 1 (ASPRV1), mRNA [NM_152792]                                                          | gene         | 1.43E-07 | 4.19E-03          | up                       | 5.30                    | 497                 |
| ASRGL1      | Homo sapiens asparaginase like 1 (ASRGL1), transcript variant 1, mRNA [NM_001083926]                                                   | gene         | 2.21E-11 | 6.64E-07          | down                     | -3.21                   | 1146                |
| ATF3        | Homo sapiens activating transcription factor 3 (ATF3), transcript variant 4, mRNA [NM_001040619]                                       | gene         | 6.59E-08 | 1.93E-03          | down                     | -2.30                   | 938                 |
| ATOH8       | Homo sapiens mRNA; cDNA DKFZp761E2117 (from clone DKFZp761E2117), [AL831857]                                                           | gene         | 2.50E-07 | 7.26E-03          | down                     | -5.47                   | 1211                |
| ATP10A      | Homo sapiens ATPase, class V, type 10A (ATP10A), mRNA [NM_024490]                                                                      | gene         | 1.50E-09 | 4.48E-05          | up                       | 23.70                   | 730                 |
| ATP2B3      | Homo sapiens ATPase, Ca++ transporting, plasma membrane 3 (ATP2B3), transcript variant 2, mRNA [NM_001001344]                          | gene         | 2.73E-07 | 7.91E-03          | down                     | -2.92                   | 914                 |
| ATP6A1      | Homo sapiens ATPase, H+ transporting, lysosomal accessory protein 1 (ATP6A1), mRNA [NM_001183]                                         | gene         | 5.51E-13 | 1.59E-02          | up                       | 2.40                    | 429                 |
| ATP8B4      | Homo sapiens ATPase, class I, type 8B, member 4 (ATP8B4), transcript variant 1, mRNA [NM_024837]                                       | gene         | 4.78E-12 | 1.44E-07          | up                       | 13.06                   | 220                 |
| ATP9A       | Homo sapiens ATPase, class II, type 9A (ATP9A), mRNA [NM_006045]                                                                       | gene         | 1.07E-09 | 3.19E-05          | up                       | 14.72                   | 557                 |
| ATXN2L      | Homo sapiens ataxin 2-like (ATXN2L), transcript variant E, mRNA [NM_148416]                                                            | gene         | 9.96E-08 | 2.92E-03          | down                     | -1.85                   | 954                 |
| ATXN7L2     | Homo sapiens ataxin 7-like 2 (ATXN7L2), mRNA [NM_153340]                                                                               | gene         | 1.63E-07 | 4.74E-03          | down                     | -2.65                   | 931                 |
| AVP1        | Homo sapiens arginine vasopressin-induced 1 (AVP1), mRNA [NM_021732]                                                                   | gene         | 1.74E-06 | 4.95E-02          | down                     | -2.69                   | 913                 |
| B3GAT1      | Homo sapiens beta-1,3-glucuronyltransferase 1 (B3GAT1), transcript variant 2, mRNA [NM_054025]                                         | gene         | 1.04E-09 | 3.11E-05          | up                       | 15.98                   | 521                 |
| B3GNT5      | Homo sapiens UDP-GlcNAc:betaGal beta-1,3-N-acetylglucosaminyltransferase 5 (B3GNT5), mRNA [NM_032047]                                  | gene         | 8.28E-17 | 2.52E-12          | up                       | 157.73                  | 47                  |
| B3GNT7      | Homo sapiens UDP-GlcNAc:betaGal beta-1,3-N-acetylglucosaminyltransferase 7 (B3GNT7), mRNA [NM_145246]                                  | gene         | 8.90E-07 | 2.57E-02          | down                     | -2.07                   | 919                 |
| B3GNT8      | Homo sapiens UDP-GlcNAc:betaGal beta-1,3-N-acetylglucosaminyltransferase 8 (B3GNT8), mRNA [NM_198540]                                  | gene         | 3.62E-10 | 1.08E-05          | up                       | 10.20                   | 641                 |
| B4GALNT3    | Homo sapiens beta-1,4-N-acetyl-galactosaminyl transferase 3 (B4GALNT3), mRNA [NM_173593]                                               | gene         | 2.67E-07 | 7.76E-03          | down                     | -4.26                   | 1037                |
| B4GALTS5    | Homo sapiens UDP-Gal:betaGlcNAc beta 1,4-galactosyltransferase 5 (B4GALTS5) (B4GALTS5), mRNA [NM_004776]                               | gene         | 1.01E-08 | 2.98E-04          | up                       | 6.90                    | 322                 |
| BACE1       | Homo sapiens beta-site APP-cleaving enzyme 1 (BACE1), transcript variant a, mRNA [NM_012104]                                           | gene         | 1.00E-09 | 3.00E-05          | up                       | 14.44                   | 786                 |
| BAIAP2-AS1  | Homo sapiens BAIAP2 antisense RNA 1 (head to head) (BAIAP2-AS1), long non-coding RNA [NR_026857]                                       | ncRNA        | 7.80E-08 | 2.29E-03          | up                       | 8.65                    | Not used            |
| BARHL1      | Homo sapiens BarH-like homeobox 1 (BARHL1), mRNA [NM_020064]                                                                           | gene         | 1.50E-06 | 4.26E-02          | down                     | -3.46                   | 1018                |
| BASP1       | Homo sapiens brain abundant, membrane attached signal protein 1 (BASP1), transcript variant 1, mRNA [NM_006317]                        | gene         | 4.11E-10 | 1.23E-05          | up                       | 9.96                    | 701                 |
| BATF2       | Homo sapiens basic leucine zipper transcription factor, ATF-like 2 (BATF2), transcript variant 1, mRNA [NM_138456]                     | gene         | 8.20E-09 | 2.43E-04          | up                       | 36.62                   | 268                 |
| BCL11B      | Homo sapiens B-cell CLL/lymphoma 11B (zinc finger protein) (BCL11B), transcript variant 1, mRNA [NM_138576]                            | gene         | 3.76E-12 | 1.13E-07          | up                       | 67.47                   | 185                 |
| BCL11B      | Homo sapiens B-cell CLL/lymphoma 11B (zinc finger protein) (BCL11B), transcript variant 1, mRNA [NM_138576]                            | gene         | 1.28E-11 | 3.87E-07          | up                       | 8.08                    | Not used            |
| BCL2A1      | Homo sapiens BCL2-related protein A1 (BCL2A1), transcript variant 1, mRNA [NM_004049]                                                  | gene         | 3.54E-10 | 1.06E-05          | up                       | 43.10                   | 77                  |
| BCL2A1      | Homo sapiens BCL2-related protein A1 (BCL2A1), transcript variant 1, mRNA [NM_004049]                                                  | gene         | 1.80E-08 | 5.33E-04          | up                       | 5.96                    | Not used            |
| BEST1       | Homo sapiens bestrophin 1 (BEST1), transcript variant 1, mRNA [NM_004183]                                                              | gene         | 6.03E-10 | 1.80E-05          | up                       | 16.03                   | 251                 |
| BEX1        | Homo sapiens brain expressed, X-linked 1 (BEX1), mRNA [NM_018476]                                                                      | gene         | 4.57E-08 | 1.34E-03          | up                       | 10.55                   | 210                 |
| BFSP1       | Homo sapiens beaded filament structural protein 1,                                                                                     |              |          |                   |                          |                         |                     |

| Gene Symbol  | Description                                                                                                                   | Feature Type  | p-value  | Corrected p-value | Regulation in NOTCH1-mut (Mut vs WT) | Fold change | Position in Heatmap |
|--------------|-------------------------------------------------------------------------------------------------------------------------------|---------------|----------|-------------------|--------------------------------------|-------------|---------------------|
| C1orf21      | Homo sapiens chromosome 1 open reading frame 21 (C1orf21), mRNA [NM_030866]                                                   | generic ORF   | 6.11E-14 | 1.85E-09          | up                                   | 12.10       | Not used            |
| C1orf229     | Homo sapiens chromosome 1 open reading frame 229 (C1orf229), mRNA [NM_207401]                                                 | generic ORF   | 1.28E-07 | 3.75E-03          | down                                 | -5.09       | Not used            |
| C1QA         | Homo sapiens complement component 1, q subcomponent, A chain (C1QA), mRNA [NM_015991]                                         | gene          | 9.27E-08 | 2.71E-03          | up                                   | 5.75        | 511                 |
| C20orf24     | Homo sapiens chromosome 20 open reading frame 24 (C20orf24), transcript variant 1, mRNA [NM_018840]                           | generic ORF   | 4.03E-09 | 1.20E-04          | up                                   | 3.39        | Not used            |
| C21orf2      | Homo sapiens chromosome 21 open reading frame 2 (C21orf2), transcript variant 3, mRNA [NM_001271441]                          | generic ORF   | 5.19E-07 | 1.50E-02          | down                                 | -2.20       | Not used            |
| CSA11        | Homo sapiens complement component 5a receptor 1 (CSA11), mRNA [NM_001736]                                                     | gene          | 3.08E-15 | 9.35E-11          | up                                   | 331.20      | 42                  |
| CSA2         | Homo sapiens complement component 5a receptor 2 (CSA2), transcript variant 1, mRNA [NM_001271749]                             | gene          | 5.62E-15 | 1.71E-10          | up                                   | 9.18        | 725                 |
| CSorf56      | Homo sapiens chromosome 5 open reading frame 56 (CSorf56), long non-coding RNA [NM_045116]                                    | ncRNA         | 2.07E-07 | 6.01E-03          | up                                   | 2.94        | Not used            |
| C8orf60      | Homo sapiens cDNA FLJ12193 fis, clone MAMMA1000856, [AK022255]                                                                | miscellaneous | 3.73E-08 | 1.10E-03          | up                                   | 64.73       | Not used            |
| C9orf139     | Homo sapiens chromosome 9 open reading frame 139 (C9orf139), mRNA [NM_207511]                                                 | generic ORF   | 3.54E-11 | 1.06E-06          | up                                   | 6.92        | Not used            |
| C9orf163     | Homo sapiens chromosome 9 open reading frame 163 (C9orf163), mRNA [NM_152571]                                                 | generic ORF   | 1.22E-06 | 3.48E-02          | down                                 | -3.47       | Not used            |
| C9orf173     | Homo sapiens chromosome 9 open reading frame 173 (C9orf173), transcript variant 1, mRNA [NM_001256699]                        | generic ORF   | 2.76E-08 | 8.13E-04          | down                                 | -2.59       | Not used            |
| C9orf173-AS1 | Homo sapiens C9orf173 antisense RNA 1 (C9orf173-AS1), long non-coding RNA [NR_038389]                                         | ncRNA         | 1.01E-06 | 2.88E-02          | down                                 | -2.09       | Not used            |
| C9orf47      | Homo sapiens chromosome 9 open reading frame 47 (C9orf47), transcript variant 1, mRNA [NM_001001938]                          | generic ORF   | 1.22E-11 | 3.69E-07          | up                                   | 15.12       | Not used            |
| C9orf62      | Homo sapiens chromosome 9 open reading frame 62 (C9orf62), mRNA [NM_173520]                                                   | generic ORF   | 1.46E-10 | 4.37E-06          | down                                 | -5.39       | Not used            |
| CA4          | Homo sapiens carbonic anhydrase IV (CA4), mRNA [NM_000717]                                                                    | gene          | 1.25E-13 | 3.79E-09          | up                                   | 24.37       | 610                 |
| CA6          | Synthetic construct Homo sapiens clone IMAGE:100074019 carbonic anhydrase IV (CA6) gene, encodes complete protein. [JF432775] | gene          | 2.93E-07 | 8.50E-03          | down                                 | -3.77       | 883                 |
| CACNA11      | Homo sapiens calcium channel, voltage-dependent, T type, alpha 1I subunit (CACNA11), transcript variant 1, mRNA [NM_021096]   | gene          | 2.95E-10 | 8.95E-06          | up                                   | 12.51       | 367                 |
| CACNA15      | Homo sapiens calcium channel, voltage-dependent, L type, alpha 1S subunit (CACNA15), mRNA [NM_000699]                         | gene          | 6.67E-07 | 1.92E-02          | down                                 | -1.90       | 1060                |
| CACNG4       | Homo sapiens calcium channel, voltage-dependent, gamma subunit 4 (CACNG4), mRNA [NM_014405]                                   | gene          | 3.88E-08 | 2.89E-03          | down                                 | -3.43       | 1026                |
| CACNG6       | Homo sapiens calcium channel, voltage-dependent, gamma subunit 6 (CACNG6), transcript variant 1, mRNA [NM_145814]             | gene          | 5.59E-10 | 1.68E-05          | up                                   | 13.31       | 749                 |
| EADM1        | Homo sapiens cell adhesion molecule 1 (CADM1), transcript variant 3, mRNA [NM_001301043]                                      | gene          | 5.34E-09 | 1.59E-04          | up                                   | 13.48       | 699                 |
| CALY         | Homo sapiens calycon neuron-specific vesicular protein (CALY), mRNA [NM_015722]                                               | gene          | 1.18E-08 | 3.50E-04          | down                                 | -8.25       | 843                 |
| CAMKK2       | Homo sapiens calcium/calmodulin-dependent protein kinase kinase 2, beta (CAMKK2), transcript variant 6, mRNA [NM_172215]      | gene          | 1.06E-07 | 3.10E-03          | up                                   | 4.00        | 346                 |
| CAMKV        | Homo sapiens CaM kinase-like vesicle-associated (CAMKV), mRNA [NM_024045]                                                     | gene          | 1.48E-06 | 4.21E-02          | down                                 | -3.71       | 1172                |
| CAMP         | Homo sapiens cathelicidin antimicrobial peptide (CAMP), mRNA [NM_004345]                                                      | gene          | 1.81E-09 | 5.39E-05          | up                                   | 178.32      | 10                  |
| CAP1         | Homo sapiens CAP, adenylate cyclase-associated protein 1 (yeast) (CAP1), transcript variant 1, mRNA [NM_006367]               | gene          | 1.67E-06 | 4.74E-02          | up                                   | 2.29        | 427                 |
| CAPZB        | Homo sapiens capping protein (actin filament) muscle Z-line, beta (CAPZB), transcript variant 3, mRNA [NM_001206541]          | gene          | 1.55E-06 | 4.40E-02          | up                                   | 2.58        | 416                 |
| CARD11       | Homo sapiens caspase recruitment domain family, member 11 (CARD11), mRNA [NM_032415]                                          | gene          | 7.96E-08 | 2.33E-03          | down                                 | -3.20       | 1075                |
| CASKIN1      | Homo sapiens CASK interacting protein 1 (CASKIN1), mRNA [NM_020764]                                                           | gene          | 8.04E-12 | 2.43E-07          | down                                 | -5.83       | 854                 |
| CASP1        | Homo sapiens caspase 1, apoptosis-related cysteine peptidase (CASP1), transcript variant alpha, mRNA [NM_033292]              | gene          | 6.64E-07 | 1.91E-02          | up                                   | 7.48        | 657                 |
| CATSPER1     | Homo sapiens cation channel, sperm associated 1 (CATSPER1), mRNA [NM_053054]                                                  | gene          | 8.66E-16 | 2.63E-11          | up                                   | 21.24       | 532                 |
| CBS          | Homo sapiens cystathionine-beta-synthase (CBS), transcript variant 1, mRNA [NM_000071]                                        | gene          | 2.58E-07 | 7.50E-03          | up                                   | 6.56        | 385                 |
| CBX6         | chromobox homolog 6 [Source:HGNC Symbol;Acc:HGNC:1556] [ENST00000407418]                                                      | gene          | 1.12E-06 | 3.19E-02          | up                                   | 2.35        | 406                 |
| CDC114       | Homo sapiens coiled-coil domain containing 114 (CDC114), mRNA [NM_144577]                                                     | gene          | 9.30E-08 | 2.72E-03          | down                                 | -3.66       | 1028                |
| CDC129       | coiled-coil domain containing 129 [Source:HGNC Symbol;Acc:HGNC:27363] [ENST00000409717]                                       | gene          | 5.23E-08 | 1.54E-03          | down                                 | -2.98       | 892                 |
| CDC147-AS1   | Homo sapiens CDC147 antisense RNA 1 (head to head) (CDC147-AS1), long non-coding RNA [NR_108036]                              | ncRNA         | 3.90E-12 | 1.18E-07          | up                                   | 26.47       | Not used            |
| CDC149       | Homo sapiens coiled-coil domain containing 149 (CDC149), transcript variant 1, mRNA [NM_173463]                               | gene          | 1.23E-17 | 3.75E-13          | up                                   | 34.54       | 261                 |
| CDC149       | Homo sapiens coiled-coil domain containing 149 (CDC149), transcript variant 1, mRNA [NM_173463]                               | gene          | 1.71E-15 | 5.19E-11          | up                                   | 15.69       | Not used            |
| CDC149       | Homo sapiens coiled-coil domain containing 149 (CDC149), transcript variant 1, mRNA [NM_173463]                               | gene          | 7.32E-09 | 2.17E-04          | up                                   | 7.41        | Not used            |
| CDC166       | Homo sapiens coiled-coil domain containing 166 (CDC166), mRNA [NM_001162914]                                                  | gene          | 9.76E-07 | 2.79E-02          | down                                 | -2.62       | 928                 |
| CDC172       | Homo sapiens coiled-coil domain containing 172 (CDC172), mRNA [NM_198515]                                                     | gene          | 1.13E-07 | 3.29E-03          | down                                 | -3.09       | 880                 |
| CDC183-AS1   | Homo sapiens CDC183 antisense RNA 1 (CDC183-AS1), long non-coding RNA [NR_024580]                                             | ncRNA         | 1.44E-08 | 4.26E-04          | down                                 | -2.84       | Not used            |
| CDC33        | Homo sapiens coiled-coil domain containing 33 (CDC33), transcript variant 1, mRNA [NM_025055]                                 | gene          | 1.37E-06 | 3.89E-02          | down                                 | -2.90       | 1200                |
| CDC57        | coiled-coil domain containing 57 [Source:HGNC Symbol;Acc:HGNC:27564] [ENST00000327026]                                        | gene          | 7.03E-07 | 2.02E-02          | down                                 | -2.15       | 939                 |
| CDC65        | Homo sapiens coiled-coil domain containing 65 (CDC65), transcript variant 1, mRNA [NM_033124]                                 | gene          | 7.08E-10 | 2.12E-05          | up                                   | 8.05        | 218                 |
| CDC88C       | Homo sapiens coiled-coil domain containing 88C (CDC88C), mRNA [NM_001080414]                                                  | gene          | 3.85E-07 | 1.11E-02          | down                                 | -2.94       | 941                 |
| CCL24        | Homo sapiens chemokine (C-C motif) ligand 24 (CCL24), mRNA [NM_002991]                                                        | gene          | 1.45E-08 | 4.30E-04          | down                                 | -3.71       | 978                 |
| CCL4L2       | Homo sapiens chemokine (C-C motif) ligand 4-like 2 (CCL4L2), transcript variant CCL4L2b2, mRNA [NM_001291470]                 | gene          | 1.42E-07 | 4.14E-03          | up                                   | 36.22       | 93                  |
| CCL4L2       | Homo sapiens chemokine (C-C motif) ligand 4-like 2 (CCL4L2), transcript variant CCL4L2b2, mRNA [NM_001291470]                 | gene          | 1.69E-09 | 5.03E-05          | up                                   | 16.21       | Not used            |
| CCL4L2       | Homo sapiens chemokine (C-C motif) ligand 4-like 2 (CCL4L2), transcript variant CCL4L2b2, mRNA [NM_001291470]                 | gene          | 1.25E-07 | 3.66E-03          | up                                   | 3.60        | Not used            |
| CCL5         | Homo sapiens chemokine (C-C motif) ligand 5 (CCL5), transcript variant 1, mRNA [NM_002985]                                    | gene          | 5.02E-09 | 1.49E-04          | up                                   | 30.13       | 586                 |
| CCM2L        | Homo sapiens cerebral cavernous malformation 2-like (CCM2L), mRNA [NM_080625]                                                 | gene          | 5.19E-11 | 1.56E-06          | down                                 | -10.87      | 872                 |
| CENB2        | Homo sapiens cyclin B2 (CCNB2), mRNA [NM_004701]                                                                              | gene          | 1.74E-06 | 4.92E-02          | up                                   | 3.39        | 383                 |
| CCNL1        | Homo sapiens cyclin I-like (CCNL1), mRNA [NM_024565]                                                                          | gene          | 6.51E-16 | 1.98E-11          | up                                   | 58.29       | 276                 |
| CCNL2        | Homo sapiens cyclin L2 (CCNL2), transcript variant 1, mRNA [NM_030937]                                                        | gene          | 2.11E-07 | 6.14E-03          | down                                 | -2.86       | 946                 |
| CCR1         | Homo sapiens chemokine (C-C motif) receptor 1 (CCR1), mRNA [NM_001295]                                                        | gene          | 5.99E-19 | 1.82E-14          | up                                   | 533.56      | 26                  |
| CCR3         | Homo sapiens chemokine (C-C motif) receptor 3 (CCR3), transcript variant 1, mRNA [NM_001837]                                  | gene          | 1.04E-08 | 3.07E-04          | up                                   | 48.15       | 169                 |
| CCRS         | Homo sapiens chemokine (C-C motif) receptor 5 (gene/pseudogene) (CCRS), transcript variant a, mRNA [NM_000579]                | gene          | 7.57E-07 | 2.17E-02          | up                                   | 10.09       | 506                 |
| CD109        | Homo sapiens CD109 molecule (CD109), transcript variant 1, mRNA [NM_133493]                                                   | gene          | 1.59E-06 | 4.53E-02          | up                                   | 5.70        | 807                 |
| CD14         | Homo sapiens CD14 molecule (CD14), transcript variant 3, mRNA [NM_001174104]                                                  | gene          | 1.27E-14 | 3.85E-10          | up                                   | 254.00      | 157                 |
| CD160        | Homo sapiens CD160 molecule (CD160), transcript variant 1, mRNA [NM_007053]                                                   | gene          | 2.59E-09 | 7.73E-05          | up                                   | 13.69       | 723                 |
| CD163        | Homo sapiens CD163 molecule (CD163), transcript variant 1, mRNA [NM_004244]                                                   | gene          | 4.81E-12 | 1.45E-07          | up                                   | 106.89      | 150                 |
| CD2          | Homo sapiens CD2 molecule (CD2), mRNA [NM_001767]                                                                             | gene          | 6.30E-11 | 1.89E-06          | up                                   | 52.72       | 567                 |
| CD226        | CD226 molecule [Source:HGNC Symbol;Acc:HGNC:16961] [ENST00000280200]                                                          | gene          | 2.30E-12 | 6.94E-08          | up                                   | 10.03       | 330                 |
| CD244        | Homo sapiens CD244 molecule, natural killer cell receptor 2B4 (CD244), transcript variant 1, mRNA [NM_016382]                 | gene          | 6.43E-11 | 1.93E-06          | up                                   | 103.66      | 325                 |
| CD247        | Homo sapiens CD247 molecule (CD247), transcript variant 1, mRNA [NM_198053]                                                   | gene          | 3.62E-09 | 1.08E-04          | up                                   | 60.62       | 573                 |
| CD28         | Homo sapiens CD28 molecule (CD28), transcript variant 1, mRNA [NM_006139]                                                     | gene          | 2.28E-21 | 6.94E-17          | up                                   | 100.97      | 106                 |
| CD300A       | Homo sapiens CD300a molecule (CD300A), transcript variant 1, mRNA [NM_007261]                                                 | gene          | 8.14E-11 | 2.45E-06          | up                                   | 142.05      | 40                  |
| CD300A       | Homo sapiens CD300a molecule (CD300A), transcript variant 1, mRNA [NM_007261]                                                 | gene          | 2.84E-09 | 8.46E-05          | up                                   | 7.31        | Not used            |
| CD300C       | Homo sapiens CD300c molecule (CD300C), mRNA [NM_006768]                                                                       | gene          | 6.08E-09 | 1.81E-04          | up                                   | 16.79       | 305                 |
| CD300E       | Homo sapiens CD300e molecule (CD300E), mRNA [NM_181449]                                                                       | gene          | 4.84E-08 | 1.42E-03          | up                                   | 3.85        | 387                 |
| CD300LF      | Homo sapiens CD300 molecule-like family member f (CD300LF), transcript variant 1, mRNA [NM_139018]                            | gene          | 2.28E-17 | 6.95E-13          | up                                   | 133.17      | 108                 |
| CD302        | Homo sapiens CD302 molecule (CD302), transcript variant 1, mRNA [NM_014880]                                                   | gene          | 8.94E-10 | 2.68E-05          | up                                   | 20.64       | 689                 |
| CD302        | Homo sapiens CD302 molecule (CD302), transcript variant 1, mRNA [NM_014880]                                                   | gene          | 1.35E-08 | 4.01E-04          | up                                   | 18.20       | Not used            |
| CD33         | Homo sapiens CD33 molecule (CD33), transcript variant 1, mRNA [NM_001772]                                                     | gene          | 1.32E-10 | 3.96E-06          | up                                   | 61.19       | 162                 |
| CD36         | Homo sapiens CD36 molecule (thrombospondin receptor) (CD36), transcript variant 2, mRNA [NM_001001547]                        | gene          | 1.81E-15 | 5.50E-11          | up                                   | 194.22      | 160                 |
| CD3D         | Homo sapiens CD3d molecule, delta (CD3-TCR complex) (CD3D), transcript variant 1, mRNA [NM_000732]                            | gene          | 4.87E-12 | 1.47E-07          | up                                   | 43.95       | 588                 |
| CD3E         | Homo sapiens CD3e molecule, epsilon (CD3-TCR complex) (CD3E), mRNA [NM_000733]                                                | gene          | 2.58E-09 | 7.68E-05          | up                                   | 8.08        | 336                 |
| CD3G         | Homo sapiens CD3g molecule, gamma (CD3-TCR complex) (CD3G), mRNA [NM_000073]                                                  | gene          | 1.20E-09 | 3.59E-05          | up                                   | 97.43       | 139                 |
| CD58         | Homo sapiens CD58 molecule (CD58), transcript variant 1, mRNA [NM_001779]                                                     | gene          | 9.72E-08 | 2.85E-03          | up                                   | 3.87        | 816                 |
| CD58         | Homo sapiens CD58 molecule (CD58), transcript variant 1, mRNA [NM_001779]                                                     | gene          | 3.34E-07 | 9.68E-03          | up                                   | 3.39        | Not used            |
| CD63         | Homo sapiens CD63 molecule (CD63), transcript variant 3, mRNA [NM_001257389]                                                  | gene          | 8.59E-08 | 2.52E-03          | up                                   | 2.99        | 451                 |
| CD68         | Homo sapiens CD68 molecule (CD68), transcript variant 1, mRNA [NM_001251]                                                     | gene          | 3.68E-08 | 1.08E-03          | up                                   | 4.73        | 818                 |
| CD7          | Homo sapiens CD7 molecule (CD7), mRNA [NM_006137]                                                                             | gene          | 6.19E-09 | 1.84E-04          | up                                   | 8.47        | 364                 |
| CD72         | CD72 molecule [Source:HGNC Symbol;Acc:HGNC:1696] [ENST00000378430]                                                            | gene          | 1.72E-08 | 5.09E-04          | down                                 | -4.27       | 984                 |
| CD8A         | Homo sapiens CD8a molecule (CD8A), transcript variant 1, mRNA [NM_001768]                                                     | gene          | 8.08E-09 | 2.40E-04          | up                                   | 50.40       | 128                 |
| CD8B         | Homo sapiens CD8b molecule (CD8B), transcript variant 5, mRNA [NM_004931]                                                     | gene          | 1.59E-08 | 4.69E-04          | up                                   | 104.40      | 129                 |
| CD8B         | Homo sapiens CD8b molecule (CD8B), transcript variant 4, mRNA [NM_172102]                                                     | gene          | 8.40E-10 | 2.51E-05          | up                                   | 28.66       | Not used            |
| CD8B         | Homo sapiens CD8b molecule (CD8B), transcript variant 5, mRNA [NM_004931]                                                     | gene          | 1.81E-09 | 5.40E-05          | up                                   | 26.30       | Not used            |
| CD93         | Homo sapiens CD93 molecule (CD93), mRNA [NM_012072]                                                                           | gene          | 7.81E-16 | 2.37E-11          | up                                   | 109.28      | 171                 |
| CDA          | Homo sapiens cytidine deaminase (CDA), mRNA [NM_001785]                                                                       | gene          | 8.45E-16 | 2.57E-11          | up                                   | 35.27       | 81                  |
| CDC42EP1     | Homo sapiens CDC42 effector protein (Rho GTPase binding) 1 (CDC42EP1), mRNA [NM_152243]                                       | gene          | 2.80E-07 | 8.12E-03          | up                                   | 7.45        | 783                 |
| CDC42EP5     | Homo sapiens CDC42 effector protein (Rho GTPase binding) 5 (CDC42EP5), mRNA [NM_145057]                                       | gene          | 1.63E-09 | 4.88E-05          | down                                 | -5.98       | 858                 |
| CDC6         | Homo sapiens cell division cycle 6 (CDC6), mRNA [NM_001254]                                                                   | gene          | 7.71E-07 | 2.21E-02          | down                                 | -2.67       | 1216                |
| CDCA2        | Homo sapiens cell division cycle associated 2 (CDCA2), mRNA [NM_152562]                                                       | gene          | 9.61E-07 | 2.75E-02          | up                                   | 4.66        | 489                 |
| CDCA7        | Homo sapiens cell division cycle associated 7 (CDCA7), transcript variant 1, mRNA [NM_031942]                                 | gene          | 7.94E-08 | 2.33E-03          | up                                   | 11.89       | 713                 |
| CDH22        | Homo sapiens cadherin 22, type 2 (CDH22), mRNA [NM_021248]                                                                    | gene          | 5.95E-08 | 1.75E-03          | down                                 | -4.16       | 1231                |
| CDH23        | Homo sapiens cadherin-related 23 (CDH23), transcript variant 1, mRNA [NM_022124]                                              | gene          | 2.66E-10 | 7.99E-06          | up                                   | 6.21        | 226                 |
| CDK20        | Homo sapiens cyclin-dependent kinase 20 (CDK20), transcript variant 3, mRNA [NM_001039803]                                    | gene          | 4.17E-09 | 1.24E-04          | up                                   | 7.40        | 811                 |
| CDK6         | Homo sapiens cyclin-dependent kinase 6 (CDK6), transcript variant 1, mRNA [NM_001259]                                         | gene          | 3.93E-08 | 1.16E-03          | up                                   | 24.70       | 541                 |
| CDKN2D       | Homo sapiens cyclin-dependent kinase inhibitor 2D (p19, inhibits CDK4) (CDKN2D), transcript variant 1, mRNA [NM_001800]       | gene          | 2.13E-09 | 6.37E-05          | up                                   | 6.25        | 397                 |
| CDRT3        | DKFZp686P15240_r1_686 (synonym: hlcc3) Homo sapiens cDNA clone DKFZp686P15240 5', mRNA sequence [BX848257]                    | gene          | 1.03E-07 | 3.00E-03          | down                                 | -2.57       | 906                 |
| CDX1         | Homo sapiens caudal type homeobox 1 (CDX1), mRNA [NM_001804]                                                                  | gene          | 4.80E-07 | 1.39E-02          | down                                 | -3.57       | 1071                |
| CDX1         | Homo sapiens caudal type homeobox 1 (CDX1), mRNA [NM_001804]                                                                  | gene          | 6.31E-07 | 1.81E-02          | down                                 | -2.59       | Not used            |
| CEACAM3      | Homo sapiens carcinoembryonic antigen-related cell adhesion molecule 3 (CEACAM3), transcript variant 1, mRNA [NM_001815]      | gene          | 1.03E-08 | 3.06E-04          | up                                   |             |                     |



| Gene Symbol  | Description                                                                                                                                      | Feature Type | p-value  | Corrected p-value | Regulation in NOTCH1-mut (Mut vs WT) | Fold change (vs WT) | Position in Heatmap |
|--------------|--------------------------------------------------------------------------------------------------------------------------------------------------|--------------|----------|-------------------|--------------------------------------|---------------------|---------------------|
| CIC          | capicua transcriptional repressor [Source:HGNC Symbol;Acc:HGNC:14214] [ENST00000572681]                                                          | gene         | 1.69E-07 | 4.93E-03          | down                                 | -2.68               | 970                 |
| CISD3        | Homo sapiens CDGSH iron sulfur domain 3 (CISD3), mRNA [NM_001136498]                                                                             | gene         | 1.64E-11 | 4.94E-07          | down                                 | -5.15               | 866                 |
| CLC          | Homo sapiens Charcot-Leyden crystal galectin (CLC), mRNA [NM_001828]                                                                             | gene         | 1.06E-12 | 3.22E-08          | up                                   | 321.32              | 15                  |
| CLDN19       | Homo sapiens claudin 19 (CLDN19), transcript variant 2, mRNA [NM_001123395]                                                                      | gene         | 1.09E-06 | 3.11E-02          | down                                 | -2.37               | 922                 |
| CLDN7        | Homo sapiens claudin 7 (CLDN7), transcript variant 1, mRNA [NM_001307]                                                                           | gene         | 5.83E-07 | 1.68E-02          | down                                 | -2.21               | 1087                |
| CLEC11A      | Homo sapiens C-type lectin domain family 11, member A (CLEC11A), mRNA [NM_002975]                                                                | gene         | 8.67E-09 | 2.57E-04          | up                                   | 13.45               | 542                 |
| CLEC12A      | Homo sapiens C-type lectin domain family 12, member A (CLEC12A), transcript variant 1, mRNA [NM_138337]                                          | gene         | 5.86E-09 | 1.74E-04          | up                                   | 25.56               | 773                 |
| CLEC19A      | Homo sapiens C-type lectin domain family 19, member A (CLEC19A), mRNA [NM_001256720]                                                             | gene         | 4.02E-07 | 1.16E-02          | down                                 | -2.76               | 1019                |
| CLEC19A      | Homo sapiens C-type lectin domain family 19, member A (CLEC19A), mRNA [NM_001256720]                                                             | gene         | 2.90E-07 | 8.40E-03          | down                                 | -2.73               | Not used            |
| CLEC1A       | Homo sapiens C-type lectin domain family 1, member A (CLEC1A), transcript variant 4, mRNA [NM_001297750]                                         | gene         | 8.28E-09 | 2.46E-04          | up                                   | 12.55               | 232                 |
| CLEC1B       | Homo sapiens C-type lectin domain family 1, member B (CLEC1B), transcript variant 1, mRNA [NM_016509]                                            | gene         | 2.26E-07 | 6.58E-03          | up                                   | 10.30               | 375                 |
| CLEC4A       | Homo sapiens C-type lectin domain family 4, member A (CLEC4A), transcript variant 1, mRNA [NM_016184]                                            | gene         | 3.91E-10 | 1.17E-05          | up                                   | 15.35               | 673                 |
| CLEC4D       | Homo sapiens C-type lectin domain family 4, member D (CLEC4D), mRNA [NM_080387]                                                                  | gene         | 1.67E-12 | 5.04E-08          | up                                   | 94.47               | 60                  |
| CLEC4D       | Homo sapiens C-type lectin domain family 4, member D (CLEC4D), mRNA [NM_080387]                                                                  | gene         | 1.30E-12 | 3.93E-08          | up                                   | 60.28               | Not used            |
| CLEC4E       | Homo sapiens C-type lectin domain family 4, member E (CLEC4E), mRNA [NM_014358]                                                                  | gene         | 3.92E-09 | 1.17E-04          | up                                   | 20.69               | 249                 |
| CLEC7A       | Homo sapiens C-type lectin domain family 7, member A (CLEC7A), transcript variant 6, mRNA [NM_197954]                                            | gene         | 3.11E-18 | 9.46E-14          | up                                   | 163.77              | 46                  |
| CLEC7A       | Homo sapiens C-type lectin domain family 7, member A (CLEC7A), transcript variant 6, mRNA [NM_197954]                                            | gene         | 2.19E-08 | 6.47E-04          | up                                   | 9.08                | Not used            |
| CLH1         | clathrin heavy chain linker domain containing 1 [Source:HGNC Symbol;Acc:HGNC:26453] [ENST00000403506]                                            | gene         | 9.54E-07 | 2.73E-02          | down                                 | -1.91               | 955                 |
| CLIC3        | Homo sapiens chloride intracellular channel 3 (CLIC3), mRNA [NM_004669]                                                                          | gene         | 3.23E-07 | 9.35E-03          | up                                   | 10.51               | 735                 |
| CMKLR1       | Homo sapiens chemokine-like receptor 1 (CMKLR1), transcript variant 1, mRNA [NM_001142343]                                                       | gene         | 6.95E-09 | 2.06E-04          | up                                   | 23.14               | 284                 |
| CKM2         | Homo sapiens cytidine monophosphate (UMP-CMP) kinase 2, mitochondrial (CKM2), transcript variant 1, mRNA [NM_207315]                             | gene         | 1.16E-08 | 3.43E-04          | up                                   | 29.19               | 269                 |
| CMT2M        | Homo sapiens CKLF-like MARVEL transmembrane domain containing 2 (CMT2M), transcript variant 1, mRNA [NM_144673]                                  | gene         | 6.80E-13 | 2.06E-08          | up                                   | 222.16              | 18                  |
| CMTM4        | Homo sapiens CKLF-like MARVEL transmembrane domain containing 4 (CMTM4), transcript variant 2, mRNA [NM_181521]                                  | gene         | 2.59E-08 | 7.64E-04          | up                                   | 4.37                | 389                 |
| CMTM8        | Homo sapiens CKLF-like MARVEL transmembrane domain containing 8 (CMTM8), mRNA [NM_178868]                                                        | gene         | 2.89E-07 | 8.37E-03          | up                                   | 11.59               | 202                 |
| CNDP2        | Homo sapiens CNDP dipeptidase 2 (metallopeptidase M20 family) (CNDP2), transcript variant 1, mRNA [NM_018235]                                    | gene         | 1.49E-06 | 4.23E-02          | down                                 | -1.91               | 1094                |
| CNIH2        | Homo sapiens cornichon family AMPA receptor auxiliary protein 2 (CNIH2), transcript variant 1, mRNA [NM_182553]                                  | gene         | 1.43E-07 | 4.19E-03          | down                                 | -6.57               | 1244                |
| CNR2         | Homo sapiens cannabinoid receptor 2 (macrophage) (CNR2), mRNA [NM_001841]                                                                        | gene         | 1.06E-06 | 3.03E-02          | down                                 | -2.66               | 1137                |
| CNTNAP3      | Homo sapiens contactin associated protein-like 3 (CNTNAP3), mRNA [NM_033655]                                                                     | gene         | 3.12E-11 | 9.41E-07          | up                                   | 19.35               | 609                 |
| CNTNAP3B     | Homo sapiens contactin associated protein-like 3B (CNTNAP3B), mRNA [NM_001201380]                                                                | gene         | 7.50E-08 | 2.20E-03          | up                                   | 9.50                | 602                 |
| COG7         | Homo sapiens component of oligomeric golgi complex 7 (COG7), mRNA [NM_153603]                                                                    | gene         | 1.83E-09 | 5.46E-05          | down                                 | -2.57               | 1084                |
| COL28A1      | Homo sapiens partial mRNA for collagen, type XVIII (COL28 gene), isoform 2, [AI890452]                                                           | gene         | 2.46E-07 | 7.13E-03          | down                                 | -4.31               | 884                 |
| CORO2A       | Homo sapiens coronin, actin binding protein, 2A (CORO2A), transcript variant 1, mRNA [NM_003389]                                                 | gene         | 9.97E-07 | 2.85E-02          | up                                   | 18.92               | 592                 |
| CORO2A       | Homo sapiens coronin, actin binding protein, 2A (CORO2A), transcript variant 1, mRNA [NM_003389]                                                 | gene         | 2.18E-07 | 6.33E-03          | up                                   | 9.80                | Not used            |
| COX6A2       | Homo sapiens cytochrome c oxidase subunit VIa polypeptide 2 (COX6A2), mRNA [NM_005205]                                                           | gene         | 6.75E-07 | 1.94E-02          | down                                 | -3.87               | 1209                |
| CPD          | Homo sapiens carboxypeptidase D (CPD), transcript variant 1, mRNA [NM_001304]                                                                    | gene         | 2.88E-07 | 8.37E-03          | up                                   | 5.92                | 820                 |
| CPNE2        | Homo sapiens copine II (CPNE2), mRNA [NM_152727]                                                                                                 | gene         | 1.31E-08 | 3.87E-04          | up                                   | 15.24               | 690                 |
| CPPED1       | Homo sapiens calcineurin-like phosphoesterase domain containing 1 (CPPED1), transcript variant 1, mRNA [NM_018340]                               | gene         | 3.02E-09 | 9.01E-05          | up                                   | 27.92               | 629                 |
| CPVL         | Homo sapiens carboxypeptidase, vitellogenin-like (CPVL), transcript variant 2, mRNA [NM_019029]                                                  | gene         | 4.50E-12 | 1.36E-07          | up                                   | 69.58               | 290                 |
| CR1          | Homo sapiens complement component (3b/4b) receptor 1 (Knops blood group) (CR1), transcript variant 5, mRNA [NM_000651]                           | gene         | 8.45E-07 | 2.42E-02          | up                                   | 14.43               | 711                 |
| CRABP2       | Homo sapiens cellular retinoic acid binding protein 2 (CRABP2), transcript variant 2, mRNA [NM_00199723]                                         | gene         | 1.47E-07 | 4.30E-03          | down                                 | -3.12               | 1007                |
| CREB3L1      | Homo sapiens cAMP responsive element binding protein 3-like 1 (CREB3L1), mRNA [NM_052854]                                                        | gene         | 6.45E-07 | 1.86E-02          | down                                 | -2.58               | 924                 |
| CREB5        | Homo sapiens cAMP responsive element binding protein 5 (CREB5), transcript variant 1, mRNA [NM_182898]                                           | gene         | 9.98E-12 | 2.70E-05          | up                                   | 81.42               | 272                 |
| CRISP1D2     | Homo sapiens cysteine-rich secretory protein LCL domain containing 2 (CRISP1D2), mRNA [NM_031476]                                                | gene         | 1.85E-15 | 5.63E-11          | up                                   | 12.31               | 326                 |
| CRF2         | Homo sapiens cytokine receptor-like factor 2 (CRF2), transcript variant 1, mRNA [NM_022148]                                                      | gene         | 2.08E-07 | 6.05E-03          | down                                 | -4.05               | 1013                |
| CRF2         | Homo sapiens cytokine receptor-like factor 2 (CRF2), transcript variant 2, mRNA [NM_001012288]                                                   | gene         | 9.62E-07 | 2.75E-02          | down                                 | -3.50               | Not used            |
| CRTAM        | Homo sapiens cytotoxic and regulatory T cell molecule (CRTAM), mRNA [NM_019604]                                                                  | gene         | 2.52E-08 | 7.44E-04          | up                                   | 21.08               | 593                 |
| CRTC1        | Homo sapiens CREB regulated transcription coactivator 1 (CRTC1), transcript variant 3, mRNA [NM_00198482]                                        | gene         | 3.98E-09 | 1.18E-04          | down                                 | -3.58               | 979                 |
| CSF1R        | Homo sapiens colony stimulating factor 1 receptor (CSF1R), transcript variant 1, mRNA [NM_005211]                                                | gene         | 2.25E-10 | 7.35E-06          | up                                   | 178.01              | 161                 |
| CSF2RA       | Homo sapiens colony stimulating factor 2 receptor, alpha, low-affinity (granulocyte-macrophage) (CSF2RA), transcript variant 6, mRNA [NM_172249] | gene         | 4.54E-17 | 1.38E-12          | up                                   | 32.80               | 84                  |
| CSF3R        | Homo sapiens colony stimulating factor 3 receptor (granulocyte) (CSF3R), transcript variant 3, mRNA [NM_156039]                                  | gene         | 9.88E-20 | 3.01E-15          | up                                   | 389.95              | 44                  |
| CSGALNACT1   | Homo sapiens chondroitin sulfate N-acetylgalactosaminyltransferase 1 (CSGALNACT1), transcript variant 2, mRNA [NM_018371]                        | gene         | 3.02E-09 | 9.00E-05          | up                                   | 41.90               | 584                 |
| CSGALNACT1   | Homo sapiens chondroitin sulfate N-acetylgalactosaminyltransferase 1 (CSGALNACT1), transcript variant 1, mRNA [NM_01130518]                      | gene         | 1.40E-07 | 4.08E-03          | up                                   | 24.19               | Not used            |
| CSN1S1       | Homo sapiens casein alpha 1S1 (CSN1S1), transcript variant 1, mRNA [NM_001890]                                                                   | gene         | 1.42E-07 | 4.14E-03          | down                                 | -2.15               | 897                 |
| CSPG4        | Homo sapiens chondroitin sulfate proteoglycan 4 (CSPG4), mRNA [NM_001897]                                                                        | gene         | 1.90E-07 | 5.54E-03          | down                                 | -2.60               | 963                 |
| CST3         | Homo sapiens cystatin C (CST3), transcript variant 1, mRNA [NM_000099]                                                                           | gene         | 7.10E-08 | 2.08E-03          | up                                   | 40.07               | 163                 |
| CST5         | Homo sapiens cystatin D (CST5), mRNA [NM_001900]                                                                                                 | gene         | 1.00E-07 | 2.94E-03          | up                                   | 20.69               | 784                 |
| CST7         | Homo sapiens cystatin F (leukocystatin) (CST7), mRNA [NM_003650]                                                                                 | gene         | 2.40E-10 | 7.20E-06          | up                                   | 37.28               | 35                  |
| CSTA         | Homo sapiens cystatin A (stefin A) (CSTA), mRNA [NM_005213]                                                                                      | gene         | 6.47E-16 | 1.97E-11          | up                                   | 181.76              | 64                  |
| CTBP2        | Homo sapiens C-terminal binding protein 2 (CTBP2), transcript variant 2, mRNA [NM_022802]                                                        | gene         | 2.61E-09 | 7.77E-05          | up                                   | 14.18               | 645                 |
| CTD-3080P1.3 | Homo sapiens uncharacterized LOC101928857 (CTD-3080P1.3), long non-coding RNA [NM_109911]                                                        | ncRNA        | 1.17E-07 | 3.42E-03          | down                                 | -2.51               | Not used            |
| CTDP1        | CTD (carboxy-terminal domain, RNA polymerase II, polypeptide A) phosphatase, subunit 1 [Source:HGNC Symbol;Acc:HGNC:2498] [ENST00000613122]      | gene         | 3.81E-08 | 1.12E-03          | down                                 | -2.65               | 968                 |
| CTSG         | Homo sapiens cathepsin G (CTSG), mRNA [NM_001911]                                                                                                | gene         | 1.64E-09 | 4.90E-05          | up                                   | 51.21               | 153                 |
| CTSL         | Homo sapiens cathepsin L (CTSL), transcript variant 1, mRNA [NM_001912]                                                                          | gene         | 7.88E-07 | 2.26E-02          | up                                   | 5.26                | 355                 |
| CTSLP8       | Homo sapiens cathepsin L pseudogene 8 (CTSLP8), non-coding RNA [NR_033405]                                                                       | gene         | 7.69E-09 | 2.28E-04          | up                                   | 8.59                | 238                 |
| CTSW         | Homo sapiens cathepsin W (CTSW), mRNA [NM_001335]                                                                                                | gene         | 2.79E-09 | 8.30E-05          | up                                   | 10.62               | 717                 |
| CXCR1        | Homo sapiens chemokine (C-X-C motif) receptor 1 (CXCR1), transcript variant 4, mRNA [NM_001337]                                                  | gene         | 1.51E-09 | 4.52E-05          | up                                   | 219.93              | 159                 |
| CXCL1        | Homo sapiens chemokine (C-X-C motif) ligand 1 (melanoma growth stimulating activity, alpha) (CXCL1), transcript variant 1, mRNA [NM_001511]      | gene         | 3.69E-17 | 1.12E-12          | up                                   | 339.98              | 30                  |
| CXCL1        | Homo sapiens chemokine (C-X-C motif) ligand 1 (melanoma growth stimulating activity, alpha) (CXCL1), transcript variant 1, mRNA [NM_001511]      | gene         | 7.39E-10 | 2.21E-05          | up                                   | 13.71               | Not used            |
| CXCL2        | Homo sapiens chemokine (C-X-C motif) ligand 2 (CXCL2), mRNA [NM_002089]                                                                          | gene         | 1.13E-06 | 3.79E-02          | up                                   | 11.23               | 829                 |
| CXCL2        | Homo sapiens chemokine (C-X-C motif) ligand 2 (CXCL2), mRNA [NM_002089]                                                                          | gene         | 1.25E-06 | 3.55E-02          | up                                   | 7.75                | Not used            |
| CXCL8        | Homo sapiens chemokine (C-X-C motif) ligand 8 (CXCL8), mRNA [NM_000584]                                                                          | gene         | 3.76E-11 | 1.13E-06          | up                                   | 183.15              | 1                   |
| CXCR1        | Homo sapiens chemokine (C-X-C motif) receptor 1 (CXCR1), mRNA [NM_000634]                                                                        | gene         | 4.97E-13 | 1.50E-08          | up                                   | 97.31               | 90                  |
| CXCR2        | Homo sapiens chemokine (C-X-C motif) receptor 2 (CXCR2), transcript variant 1, mRNA [NM_001557]                                                  | gene         | 5.19E-14 | 1.57E-09          | up                                   | 59.72               | 16                  |
| CXCR2P1      | Homo sapiens chemokine (C-X-C motif) receptor 2 pseudogene 1 (CXCR2P1), non-coding RNA [NR_002712]                                               | gene         | 3.94E-08 | 1.16E-03          | up                                   | 21.12               | 242                 |
| CXorf57      | Homo sapiens chromosome X open reading frame 57 (CXorf57), transcript variant 1, mRNA [NM_018015]                                                | gene         | 1.54E-11 | 4.65E-07          | up                                   | 14.17               | 369                 |
| CYBB         | Homo sapiens cytochrome b-245, beta polypeptide (CYBB), mRNA [NM_000397]                                                                         | gene         | 1.83E-07 | 5.34E-03          | up                                   | 88.96               | 74                  |
| CYGB         | Homo sapiens cytoglobin (CYGB), mRNA [NM_134268]                                                                                                 | gene         | 5.11E-07 | 1.47E-02          | down                                 | -4.98               | 1223                |
| CYP1B1       | Homo sapiens cytochrome P450, family 1, subfamily B, polypeptide 1 (CYP1B1), mRNA [NM_000104]                                                    | gene         | 5.60E-14 | 1.70E-09          | up                                   | 91.15               | 264                 |
| CYP1B1       | Homo sapiens cytochrome P450, family 1, subfamily B, polypeptide 1 (CYP1B1), mRNA [NM_000104]                                                    | gene         | 1.13E-11 | 3.42E-07          | up                                   | 24.37               | Not used            |
| CYP27A1      | Homo sapiens cytochrome P450, family 27, subfamily A, polypeptide 1 (CYP27A1), mRNA [NM_000784]                                                  | gene         | 9.29E-13 | 2.81E-08          | up                                   | 252.09              | 12                  |
| CYP4F2       | Homo sapiens cytochrome P450, family 4, subfamily F, polypeptide 2 (CYP4F2), mRNA [NM_001082]                                                    | gene         | 2.01E-14 | 6.10E-10          | up                                   | 9.86                | 224                 |
| CYP4F3       | Homo sapiens cytochrome P450, family 4, subfamily F, polypeptide 3 (CYP4F3), transcript variant 1, mRNA [NM_000896]                              | gene         | 6.74E-20 | 2.05E-15          | up                                   | 96.55               | 172                 |
| CYSTM1       | Homo sapiens cysteine-rich transmembrane module containing 1 (CYSTM1), mRNA [NM_032412]                                                          | gene         | 3.56E-07 | 1.03E-02          | up                                   | 5.12                | 815                 |
| CYTH1        | cytohesin 1 [Source:HGNC Symbol;Acc:HGNC:9501] [ENST00000586299]                                                                                 | gene         | 1.19E-07 | 3.47E-03          | down                                 | -2.99               | 971                 |
| CYTH3        | Homo sapiens cytohesin 3 (CYTH3), mRNA [NM_004272]                                                                                               | gene         | 6.40E-12 | 1.93E-07          | up                                   | 11.04               | 328                 |
| DAB1         | Homo sapiens Dab, reelin signal transducer, homolog 1 (Drosophila) (DAB1), mRNA [NM_021080]                                                      | gene         | 5.58E-07 | 1.61E-02          | down                                 | -3.09               | 1196                |
| DAB2         | Homo sapiens Dab, mitogen-responsive phosphoprotein, homolog 2 (Drosophila) (DAB2), transcript variant 1, mRNA [NM_001343]                       | gene         | 8.21E-10 | 2.46E-05          | up                                   | 12.03               | 724                 |
| DACH1        | Homo sapiens dachshund family transcription factor 1 (DACH1), transcript variant 1, mRNA [NM_080759]                                             | gene         | 3.24E-14 | 9.83E-10          | up                                   | 18.28               | 654                 |
| DAXAP2       | Homo sapiens DAX associated protein 2 (DAXAP2), transcript variant 1, mRNA [NM_014764]                                                           | gene         | 3.91E-07 | 1.13E-02          | up                                   | 2.03                | 420                 |
| DEFA3        | Homo sapiens defensin, alpha 3, neutrophil-specific (DEFA3), mRNA [NM_005217]                                                                    | gene         | 1.47E-09 | 4.38E-05          | up                                   | 2241.74             | 4                   |
| DEFA4        | Homo sapiens defensin, alpha 4, corticostatin (DEFA4), mRNA [NM_001925]                                                                          | gene         | 1.01E-13 | 3.08E-09          | up                                   | 35.77               | 9                   |
| DEFB4A       | Homo sapiens defensin, beta 4A (DEFB4A), mRNA [NM_004942]                                                                                        | gene         | 3.34E-07 | 9.67E-03          | down                                 | -3.77               | 1191                |
| DENND3       | DEN1/MADD domain containing 3 [Source:HGNC Symbol;Acc:HGNC:29134] [ENST00000520482]                                                              | gene         | 9.09E-09 | 2.70E-04          | up                                   | 70.64               | 114                 |
| DENND3       | Homo sapiens DENN/MADD domain containing 3 (DENND3), mRNA [NM_014957]                                                                            | gene         | 8.56E-12 | 2.58E-07          | up                                   | 44.65               | Not used            |
| DEPDC5       | Homo sapiens DEP domain containing 5 (DEPDC5), transcript variant 4, mRNA [NM_001242896]                                                         | gene         | 1.68E-07 | 4.91E-03          | down                                 | -2.75               | 1102                |
| DGAT2        | Homo sapiens diacylglycerol O-acyltransferase 2 (DGAT2), transcript variant 1, mRNA [NM_032564]                                                  | gene         | 9.37E-10 | 2.80E-05          | up                                   | 27.77               | 308                 |
| DGCR2        | Homo sapiens DiGeorge syndrome critical region gene 2 (DGCR2), transcript variant 1, mRNA [NM_005137]                                            | gene         | 1.31E-06 | 3.74E-02          | up                                   | 2.43                | 430                 |
| DHR53        | Homo sapiens dehydrogenase/reductase (SDR family) member 3 (DHR53), mRNA [NM_004753]                                                             | gene         | 3.52E-07 | 1.02E-02          | up                                   | 19.35               | 579                 |
| DIABLO       | Homo sapiens diablo, IAP-binding mitochondrial protein (DIABLO), transcript variant 5, mRNA [NM_001278302]                                       | gene         | 5.72E-10 | 1.71E-05          | down                                 | -4.28               | 867                 |
| DLEC1        | Homo sapiens deleted in lung and esophageal cancer 1 (DLEC1), transcript variant DLEC1-N1, mRNA [NM_007335]                                      | gene         | 1.04E-06 | 2.98E-02          | up                                   | 7.20                | 677                 |
| DLG1-AS1     | Homo sapiens DLG1 antisense RNA 1 (DLG1-AS1), long non-coding RNA [NR_038289]                                                                    | ncRNA        | 1.35E-06 | 3.84E-02          | down                                 | -3.31               | Not used            |
| DLG5         | Homo sapiens discs, large homolog 5 (Drosophila) (DLG5), mRNA [NM_004747]                                                                        | gene         | 7.05E-11 | 2.12E-06          | up                                   | 7.40                | 206                 |
| DMWD         | Homo sapiens dystrophia myotonica, WD repeat containing (DMWD), mRNA [NM_004943]                                                                 | gene         | 7.14E-07 | 2.05E-02          | down                                 | -1.91               | 1114                |
| DMXL2        | Homo sapiens Dmx-like 2 (DMXL2), transcript variant 2, mRNA [NM_015263]                                                                          | gene         | 2.19E-16 | 6.67E-12          | up                                   | 16.56               | 250                 |
| DNAI2        | Homo sapiens dynein, axonemal, intermediate chain 2 (DNAI2), transcript variant 1, mRNA [NM_023036]                                              | gene         | 4.92E-08 | 1.45              |                                      |                     |                     |

| Gene Symbol   | Description                                                                                                                         | Feature Type          | p-value  | Corrected p-value | Regulation in NOTCH1-mut (Mut vs WT) | Fold change (Mut vs WT) | Position in Heatmap |
|---------------|-------------------------------------------------------------------------------------------------------------------------------------|-----------------------|----------|-------------------|--------------------------------------|-------------------------|---------------------|
| EOMES         | Homo sapiens eomesodermin (EOMES), transcript variant 2, mRNA [NM_005442]                                                           | gene                  | 8.54E-12 | 2.58E-07          | up                                   | 51.50                   | 195                 |
| EPAS1         | Homo sapiens endothelial PAS domain protein 1 (EPAS1), mRNA [NM_001430]                                                             | gene                  | 2.24E-14 | 6.80E-10          | up                                   | 34.93                   | 536                 |
| EPB41L3       | Homo sapiens erythrocyte membrane protein band 4.1-like 3 (EPB41L3), transcript variant 1, mRNA [NM_012307]                         | gene                  | 2.16E-12 | 6.54E-08          | up                                   | 19.82                   | 805                 |
| EPHA4         | Homo sapiens EPH receptor A4 (EPHA4), mRNA [NM_004438]                                                                              | gene                  | 2.82E-07 | 8.19E-03          | up                                   | 11.70                   | 696                 |
| ERC2-IT1      | Homo sapiens ERC2 intronic transcript 1 (non-protein coding) (ERC2-IT1), long non-coding RNA [NR_024615]                            | unannotated probe     | 1.27E-06 | 3.62E-02          | down                                 | -3.18                   | 1190                |
| ERC-00041_75  | not provided                                                                                                                        | unannotated probe     | 1.64E-06 | 4.65E-02          | down                                 | -2.11                   | Not used            |
| ERC-00092_138 | not provided                                                                                                                        | unannotated probe     | 6.10E-09 | 1.81E-04          | down                                 | -3.73                   | Not used            |
| ERC-00126_533 | not provided                                                                                                                        | unannotated probe     | 5.67E-07 | 1.63E-02          | down                                 | -2.22                   | Not used            |
| ERC-00137_95  | not provided                                                                                                                        | unannotated probe     | 2.86E-07 | 8.30E-03          | down                                 | -2.18                   | Not used            |
| ESR1          | Homo sapiens estrogen receptor 1 (ESR1), transcript variant 1, mRNA [NM_000125]                                                     | gene                  | 9.78E-07 | 2.80E-02          | down                                 | -2.92                   | 1174                |
| ETS2          | Homo sapiens ets avian erythroblastosis virus E26 oncogene homolog 2 (ETS2), transcript variant 1, mRNA [NM_005239]                 | gene                  | 1.59E-17 | 4.84E-13          | up                                   | 51.47                   | 115                 |
| ETV7          | Homo sapiens ets variant 7 (ETV7), transcript variant 1, mRNA [NM_016135]                                                           | gene                  | 1.23E-12 | 3.71E-08          | up                                   | 28.68                   | 235                 |
| EVPLL         | Homo sapiens evoplakin-like (EVPLL), mRNA [NM_001145127]                                                                            | gene                  | 3.91E-08 | 1.15E-03          | down                                 | -6.69                   | 1212                |
| EVX1          | Homo sapiens even-skipped homeobox 1 (EVX1), mRNA [NM_001989]                                                                       | gene                  | 9.14E-07 | 2.62E-02          | down                                 | -4.71                   | 1225                |
| EYS           | Homo sapiens eyes shut homolog (Drosophila) (EYS), transcript variant 1, mRNA [NM_001142800]                                        | gene                  | 1.24E-07 | 3.63E-03          | down                                 | -2.60                   | 902                 |
| F2R           | Homo sapiens coagulation factor II (thrombin) receptor (F2R), mRNA [NM_001992]                                                      | gene                  | 2.30E-10 | 6.90E-06          | up                                   | 22.01                   | 191                 |
| F2R           | Homo sapiens coagulation factor II (thrombin) receptor, mRNA [cDNA clone IMAGE:4849569], with apparent retained intron. [BC016059]  | miscellaneous         | 1.74E-06 | 4.94E-02          | up                                   | 13.54                   | Not used            |
| F2R11         | Homo sapiens coagulation factor II (thrombin) receptor-like 1 (F2R11), mRNA [NM_005242]                                             | gene                  | 5.85E-11 | 1.76E-06          | up                                   | 37.39                   | 282                 |
| F5            | Homo sapiens coagulation factor I (proaccelerin, labile factor) (F5), mRNA [NM_000130]                                              | gene                  | 4.84E-08 | 1.42E-03          | up                                   | 14.47                   | 714                 |
| FAAH2         | Homo sapiens fatty acid amide hydrolase 2 (FAAH2), mRNA [NM_174932]                                                                 | gene                  | 9.11E-07 | 8.61E-02          | up                                   | 10.17                   | 826                 |
| FAM101B       | Homo sapiens family with sequence similarity 101, member B (FAM101B), mRNA [NM_182705]                                              | gene                  | 2.71E-13 | 8.21E-09          | up                                   | 325.58                  | 49                  |
| FAM105A       | Homo sapiens family with sequence similarity 105, member A (FAM105A), mRNA [NM_019018]                                              | gene                  | 2.87E-08 | 8.47E-04          | up                                   | 35.33                   | 103                 |
| FAM107A       | Homo sapiens family with sequence similarity 107, member A (FAM107A), transcript variant 4, mRNA [NM_001282714]                     | gene                  | 7.05E-08 | 2.07E-03          | down                                 | -3.66                   | 1197                |
| FAM107A       | Homo sapiens family with sequence similarity 107, member A (FAM107A), transcript variant 4, mRNA [NM_001282714]                     | gene                  | 7.46E-07 | 2.14E-02          | down                                 | -2.21                   | Not used            |
| FAM129A       | Homo sapiens family with sequence similarity 129, member A (FAM129A), mRNA [NM_052966]                                              | gene                  | 1.02E-11 | 3.07E-07          | up                                   | 297.91                  | 50                  |
| FAM129B       | Homo sapiens family with sequence similarity 129, member B (FAM129B), transcript variant 1, mRNA [NM_022833]                        | gene                  | 3.18E-11 | 9.59E-07          | up                                   | 8.56                    | 321                 |
| FAM131C       | Homo sapiens family with sequence similarity 131, member C (FAM131C), mRNA [NM_182623]                                              | gene                  | 6.47E-07 | 1.86E-02          | down                                 | -3.11                   | 1220                |
| FAM132B       | Homo sapiens family with sequence similarity 132, member B (FAM132B), mRNA [NM_001291832]                                           | gene                  | 1.95E-07 | 5.66E-03          | down                                 | -3.04                   | 1249                |
| FAM134B       | Homo sapiens family with sequence similarity 134, member B (FAM134B), transcript variant 1, mRNA [NM_001034850]                     | gene                  | 4.30E-07 | 1.24E-02          | up                                   | 23.08                   | 796                 |
| FAM13A        | Homo sapiens family with sequence similarity 13, member A (FAM13A), transcript variant 1, mRNA [NM_014883]                          | gene                  | 9.36E-12 | 2.82E-07          | up                                   | 21.55                   | 698                 |
| FAM157C       | Homo sapiens family with sequence similarity 157, member C (FAM157C), long non-coding RNA [NR_126161]                               | gene                  | 4.13E-11 | 1.24E-06          | up                                   | 19.07                   | 279                 |
| FAM169A       | Homo sapiens family with sequence similarity 169, member A (FAM169A), transcript variant 1, mRNA [NM_015566]                        | gene                  | 2.79E-09 | 8.31E-05          | up                                   | 19.17                   | 583                 |
| FAM169A       | Homo sapiens family with sequence similarity 169, member A (FAM169A), transcript variant 1, mRNA [NM_015566]                        | gene                  | 3.65E-12 | 1.10E-07          | up                                   | 9.47                    | Not used            |
| FAM179A       | Homo sapiens family with sequence similarity 179, member A (FAM179A), mRNA [NM_199280]                                              | gene                  | 5.17E-09 | 1.54E-04          | up                                   | 7.16                    | 319                 |
| FAM180A       | Homo sapiens family with sequence similarity 180, member A (FAM180A), mRNA [NM_205855]                                              | gene                  | 3.16E-07 | 9.16E-03          | down                                 | -2.03                   | 948                 |
| FAM181A       | Homo sapiens family with sequence similarity 181, member A (FAM181A), transcript variant 1, mRNA [NM_138344]                        | gene                  | 7.55E-07 | 2.17E-02          | down                                 | -2.61                   | 1264                |
| FAM181B       | Homo sapiens family with sequence similarity 181, member B (FAM181B), mRNA [NM_175885]                                              | gene                  | 4.41E-08 | 1.30E-03          | down                                 | -2.68                   | 886                 |
| FAM198B       | Homo sapiens family with sequence similarity 198, member B (FAM198B), transcript variant 2, mRNA [NM_016613]                        | gene                  | 1.44E-14 | 4.38E-10          | up                                   | 71.25                   | 293                 |
| FAM212A       | Homo sapiens family with sequence similarity 212, member A (FAM212A), mRNA [NM_203370]                                              | gene                  | 7.30E-07 | 2.10E-02          | down                                 | -1.98                   | 1091                |
| FAM212B       | Homo sapiens family with sequence similarity 212, member B (FAM212B), transcript variant 1, mRNA [NM_019099]                        | gene                  | 8.84E-08 | 2.59E-03          | up                                   | 3.37                    | 491                 |
| FAM21C        | Homo sapiens family with sequence similarity 21, member C (FAM21C), transcript variant 3, mRNA [NM_001169107]                       | gene                  | 5.78E-08 | 1.70E-03          | down                                 | -2.73                   | 921                 |
| FAM21EP       | Homo sapiens family with sequence similarity 21, member E, pseudogene (FAM21EP), non-coding RNA [NR_038275]                         | gene                  | 1.39E-06 | 3.96E-02          | down                                 | -3.24                   | 935                 |
| FAM231A       | Homo sapiens family with sequence similarity 231, member A (FAM231A), mRNA [NM_001282321]                                           | gene                  | 6.95E-07 | 2.00E-02          | down                                 | -2.93                   | 1120                |
| FAM231A       | Homo sapiens family with sequence similarity 231, member A (FAM231A), mRNA [NM_001282321]                                           | gene                  | 1.86E-07 | 5.43E-03          | down                                 | -1.93                   | Not used            |
| FAM49B        | Homo sapiens family with sequence similarity 49, member B (FAM49B), transcript variant 2, mRNA [NM_016623]                          | gene                  | 4.99E-14 | 1.51E-09          | up                                   | 4.85                    | 342                 |
| FAM63A        | Homo sapiens family with sequence similarity 63, member A (FAM63A), transcript variant 2, mRNA [NM_001040217]                       | gene                  | 9.22E-07 | 2.64E-02          | up                                   | 5.19                    | 649                 |
| FAM66A        | Homo sapiens family with sequence similarity 66, member A (FAM66A), long non-coding RNA [NR_026789]                                 | gene                  | 7.59E-07 | 2.18E-02          | down                                 | -2.20                   | 1104                |
| FAM71E2       | Homo sapiens family with sequence similarity 71, member E2 (FAM71E2), mRNA [NM_001145402]                                           | gene                  | 1.28E-06 | 3.65E-02          | down                                 | -2.07                   | 907                 |
| FAM8A1        | Homo sapiens family with sequence similarity 8, member A1 (FAM8A1), mRNA [NM_016255]                                                | gene                  | 4.87E-08 | 1.43E-03          | up                                   | 3.19                    | 401                 |
| FAR2          | Homo sapiens fatty acyl CoA reductase 2 (FAR2), transcript variant 2, mRNA [NM_018099]                                              | gene                  | 4.65E-13 | 1.41E-08          | up                                   | 16.15                   | 655                 |
| FAS           | Homo sapiens Fas cell surface death receptor (FAS), transcript variant 1, mRNA [NM_000043]                                          | gene                  | 6.15E-09 | 1.83E-04          | up                                   | 9.13                    | 678                 |
| FAS           | Homo sapiens Fas cell surface death receptor (FAS), transcript variant 1, mRNA [NM_000043]                                          | gene                  | 2.49E-08 | 7.36E-04          | up                                   | 7.66                    | Not used            |
| FAS           | Homo sapiens Fas cell surface death receptor (FAS), transcript variant 1, mRNA [NM_000043]                                          | gene                  | 1.18E-08 | 3.50E-04          | up                                   | 6.95                    | Not used            |
| FASLG         | Homo sapiens Fas ligand (TNF superfamily, member 6) (FASLG), transcript variant 1, mRNA [NM_000639]                                 | gene                  | 4.71E-08 | 1.39E-03          | up                                   | 13.93                   | 221                 |
| FAT3          | Homo sapiens FAT atypical cadherin 3 (FAT3), mRNA [NM_001008781]                                                                    | gene                  | 5.11E-07 | 1.47E-02          | down                                 | -2.61                   | 1021                |
| FBRSL1        | Homo sapiens fibrosin-like 1 (FBRSL1), mRNA [NM_001142641]                                                                          | gene                  | 2.70E-07 | 7.82E-03          | down                                 | -6.57                   | 844                 |
| FBXL5         | Homo sapiens F-box and leucine-rich repeat protein 5 (FBXL5), transcript variant 1, mRNA [NM_012161]                                | gene                  | 1.52E-07 | 4.43E-03          | up                                   | 3.69                    | 413                 |
| FBXO17        | F-box protein 17 [Source:HGNC Symbol;Acc:HGNC:18754] [ENST00000601394]                                                              | gene                  | 1.15E-06 | 3.29E-02          | down                                 | -2.68                   | 964                 |
| FCAR          | Homo sapiens Fc fragment of IgA, receptor for (FCAR), transcript variant 3, mRNA [NM_133271]                                        | gene                  | 3.62E-15 | 1.10E-10          | up                                   | 194.31                  | 28                  |
| FCAR          | Homo sapiens Fc fragment of IgA, receptor for (FCAR), transcript variant 1, mRNA [NM_002000]                                        | gene                  | 5.95E-15 | 1.81E-10          | up                                   | 47.29                   | Not used            |
| FCER1G        | Homo sapiens Fc fragment of IgE, high affinity I, receptor for; gamma polypeptide (FCER1G), mRNA [NM_004106]                        | gene                  | 1.94E-13 | 5.89E-09          | up                                   | 23.05                   | 82                  |
| FCGR1B        | Homo sapiens Fc fragment of IgG, high affinity I, receptor (CD64) (FCGR1B), transcript variant 1, mRNA [NM_001017986]               | gene                  | 3.04E-13 | 9.20E-09          | up                                   | 251.74                  | 158                 |
| FCGR1B        | Homo sapiens Fc fragment of IgG, high affinity I, receptor (CD64) (FCGR1B), transcript variant 3, mRNA [NM_001244910]               | gene                  | 4.79E-12 | 1.45E-07          | up                                   | 95.08                   | Not used            |
| FCGR1B        | Homo sapiens Fc fragment of IgG, high affinity I, receptor (CD64) (FCGR1B), transcript variant 3, mRNA [NM_001244910]               | gene                  | 8.23E-12 | 2.48E-07          | up                                   | 90.88                   | Not used            |
| FCGR2C        | Homo sapiens Fc fragment of IgG, low affinity I, receptor (CD32) (gene/pseudogene) (FCGR2C), transcript variant 1, mRNA [NM_201563] | gene                  | 9.48E-10 | 2.84E-05          | up                                   | 44.17                   | 97                  |
| FCGR3A        | Homo sapiens Fc fragment of IgG, low affinity IIIa, receptor (CD32a) (FCGR3A), transcript variant 1, mRNA [NM_000569]               | gene                  | 8.44E-14 | 2.56E-09          | up                                   | 2636.74                 | 21                  |
| FCN1          | Homo sapiens ficolin (collagen/fibrinogen domain containing) 1 (FCN1), mRNA [NM_002003]                                             | gene                  | 8.41E-13 | 2.54E-08          | up                                   | 374.05                  | 13                  |
| FCN1          | Homo sapiens ficolin (collagen/fibrinogen domain containing) 1 (FCN1), mRNA [NM_002003]                                             | gene                  | 2.86E-14 | 8.69E-10          | up                                   | 191.84                  | Not used            |
| FCN3          | ficolin (collagen/fibrinogen domain containing) 3 [Source:HGNC Symbol;Acc:HGNC:3625] [ENST00000498393]                              | gene                  | 1.70E-08 | 5.04E-04          | down                                 | -2.94                   | 974                 |
| FCRL6         | Homo sapiens Fc receptor-like 6 (FCRL6), transcript variant 2, mRNA [NM_001284217]                                                  | gene                  | 1.74E-08 | 5.14E-04          | up                                   | 21.56                   | 736                 |
| FER116-AS1    | Homo sapiens FER116 antisense RNA 1 (FER116-AS1), long non-coding RNA [NR_040044]                                                   | ncRNA                 | 8.58E-07 | 2.46E-02          | down                                 | -3.95                   | Not used            |
| FER116-AS2    | G01564882F1 NIH_MGC_20 Homo sapiens cDNA clone IMAGE:3925989 5', mRNA sequence [BE275913]                                           | miscellaneous         | 9.52E-07 | 2.72E-02          | down                                 | -2.49                   | Not used            |
| FFAR2         | Homo sapiens free fatty acid receptor 2 (FFAR2), mRNA [NM_005306]                                                                   | gene                  | 1.20E-17 | 3.65E-13          | up                                   | 56.04                   | 274                 |
| FGD4          | Homo sapiens FYVE, RhoGEF and PH domain containing 4 (FGD4), mRNA [NM_139241]                                                       | gene                  | 9.08E-12 | 2.74E-07          | up                                   | 43.77                   | 100                 |
| FGD4          | Homo sapiens FYVE, RhoGEF and PH domain containing 4 (FGD4), mRNA [NM_139241]                                                       | gene                  | 1.43E-12 | 4.34E-08          | up                                   | 27.36                   | Not used            |
| FGD4          | FYVE, RhoGEF and PH domain containing 4 [Source:HGNC Symbol;Acc:HGNC:19125] [ENST00000472289]                                       | gene                  | 1.51E-14 | 4.58E-10          | up                                   | 16.08                   | Not used            |
| FGFBP2        | Homo sapiens fibroblast growth factor binding protein 2 (FGFBP2), mRNA [NM_031950]                                                  | gene                  | 6.84E-10 | 2.05E-05          | up                                   | 34.15                   | 563                 |
| FGL2          | Homo sapiens fibrinogen-like 2 (FGL2), mRNA [NM_006682]                                                                             | gene                  | 2.46E-08 | 7.27E-04          | up                                   | 83.34                   | 270                 |
| FIGLN2        | Homo sapiens figletin-like 2 (FIGLN2), mRNA [NM_001013690]                                                                          | gene                  | 4.08E-09 | 1.22E-04          | down                                 | -2.51                   | 975                 |
| FKBP1A        | Homo sapiens FK506 binding protein 1A, 12kDa (FKBP1A), transcript variant 1, mRNA [NM_008001]                                       | gene                  | 1.60E-06 | 4.53E-02          | up                                   | 2.50                    | 411                 |
| FLJ27255      | not provided                                                                                                                        | unannotated probe     | 2.08E-08 | 6.13E-04          | up                                   | 7.98                    | Not used            |
| FLJ36777      | uncharacterized LOC730971 [Source:EntrezGene;Acc:730971] [ENST00000501888]                                                          | uncharacterized locus | 5.95E-07 | 1.71E-02          | down                                 | -2.21                   | Not used            |
| FLJ44477      | Homo sapiens cDNA FLJ44477 fls, clone UTER0213703. [AK126441]                                                                       | miscellaneous         | 1.12E-06 | 3.21E-02          | down                                 | -1.99                   | Not used            |
| FLJ46026      | PREDICTED: Homo sapiens FLJ46026 protein (FLJ46026), misc_RNA [XR_159298]                                                           | miscellaneous         | 1.10E-07 | 3.22E-03          | down                                 | -3.98                   | Not used            |
| FLNA          | Homo sapiens filamin A, alpha (FLNA), transcript variant 1, mRNA [NM_001456]                                                        | gene                  | 3.63E-07 | 1.05E-02          | up                                   | 2.95                    | 493                 |
| FND3C3B       | Homo sapiens fibronectin type III domain containing 3B (FND3C3B), transcript variant 1, mRNA [NM_022763]                            | gene                  | 2.77E-07 | 8.04E-03          | up                                   | 10.07                   | 313                 |
| FND3C3B       | Homo sapiens fibronectin type III domain containing 3B (FND3C3B), transcript variant 1, mRNA [NM_022763]                            | gene                  | 4.10E-10 | 1.23E-05          | up                                   | 9.48                    | Not used            |
| FNIP2         | Homo sapiens follitropin interacting protein 2 (FNIP2), mRNA [NM_020840]                                                            | gene                  | 4.77E-13 | 1.45E-08          | up                                   | 32.96                   | 833                 |
| FOLR3         | Homo sapiens folate receptor 3 (FOLR3), mRNA [NM_000804]                                                                            | gene                  | 2.26E-15 | 6.89E-11          | up                                   | 50.34                   | 539                 |
| FOSL2         | Homo sapiens FOS-like antigen 2 (FOSL2), mRNA [NM_005253]                                                                           | gene                  | 1.13E-06 | 3.41E-02          | up                                   | 21.28                   | 832                 |
| FOXB1         | Homo sapiens forkhead box B1 (FOXB1), mRNA [NM_012182]                                                                              | gene                  | 5.73E-09 | 1.70E-04          | down                                 | -6.68                   | 1163                |
| FOXP4         | Homo sapiens forkhead box P4 (FOXP4), transcript variant 1, mRNA [NM_001012426]                                                     | gene                  | 8.25E-07 | 2.37E-02          | down                                 | -15.35                  | 876                 |
| FRP1          | Homo sapiens formyl peptide receptor 1 (FRP1), transcript variant 2, mRNA [NM_002029]                                               | gene                  | 2.81E-19 | 8.56E-15          | up                                   | 1195.94                 | 25                  |
| FRP2          | Homo sapiens formyl peptide receptor 2 (FRP2), transcript variant 1, mRNA [NM_0010462]                                              | gene                  | 3.29E-16 | 1.00E-11          | up                                   | 201.82                  | 67                  |
| FRAT1         | Homo sapiens frequently rearranged in advanced T-cell lymphomas 1 (FRAT1), mRNA [NM_005479]                                         | gene                  | 1.92E-07 | 5.59E-03          | up                                   | 6.56                    | 404                 |
| FRAT1         | Homo sapiens frequently rearranged in advanced T-cell lymphomas 1 (FRAT1), mRNA [NM_005479]                                         | gene                  | 1.74E-06 | 4.93E-02          | up                                   | 4.39                    | Not used            |
| FRAT2         | Homo sapiens frequently rearranged in advanced T-cell lymphomas 2 (FRAT2), mRNA [NM_012083]                                         | gene                  | 1.00E-10 | 3.02E-06          | up                                   | 14.22                   | 757                 |
| FTH1          | Homo sapiens ferritin, heavy polypeptide 1 (FTH1), mRNA [NM_002032]                                                                 | gene                  | 4.66E-08 | 1.37E-03          | up                                   | 2.15                    | 448                 |
| FTH1          | Homo sapiens ferritin, heavy polypeptide 1 (FTH1), mRNA [NM_002032]                                                                 | gene                  | 1.10E-07 | 3.23E-03          | up                                   | 2.13                    | Not used            |
| FTH1          | Homo sapiens ferritin, heavy polypeptide 1 (FTH1), mRNA [NM_002032]                                                                 | gene                  | 2.02E-08 | 5.96E-04          | up                                   | 2.09                    | Not used            |
| FUT4          | Homo sapiens fucosyltransferase 4 (alpha 1,3) fucosyltransferase, myeloid-specific (FUT4), mRNA [NM_002033]                         | gene                  | 7.16E-08 | 2.10E-03          | up                                   | 5.44                    | 320                 |
| FYB           | Homo sapiens FYN binding protein (FYB), transcript variant 1, mRNA [NM_001465]                                                      | gene                  | 5.86E-13 | 1.77E-08          | up                                   | 463.19                  | 51                  |
| G0S2          | Homo sapiens G0/G1 switch 2 (G0S2), mRNA [NM_015714]                                                                                | gene                  | 1.08E-12 | 3.26E-08          | up                                   | 1190.15                 | 2                   |
| GABRR3        | Homo sapiens gamma-aminobutyric acid (GABA) A receptor, rho 3 (gene/pseudogene) (GABRR3), transcript variant 1, mRNA [NM_001105580] | gene                  | 2.26E-07 | 6.58E-03          | down                                 | -3.97                   | 1064                |
| GALC          | Homo sapiens galactosylceramidase (GALC), transcript variant 1, mRNA [NM_000153]                                                    | gene                  | 1.99E-10 | 5.96E-06          | up                                   | 4.85                    | 463                 |
| GALR3         | Homo sapiens galanin receptor 3 (GALR3), mRNA [NM_003614                                                                            |                       |          |                   |                                      |                         |                     |

| Gene Symbol | Description                                                                                                                                           | Feature Type | p-value  | Corrected p-value | Regulation in NOTCH1-mut (Mut vs WT) | Fold change (WT) | Position in Heatmap |
|-------------|-------------------------------------------------------------------------------------------------------------------------------------------------------|--------------|----------|-------------------|--------------------------------------|------------------|---------------------|
| GLIPR2      | Homo sapiens GU pathogenesis-related 2 (GLIPR2), transcript variant 1, mRNA [NM_022343]                                                               | gene         | 4.49E-08 | 1.32E-03          | up                                   | 10.20            | Not used            |
| GLIS1       | Homo sapiens GLIS family zinc finger 1 (GLIS1), mRNA [NM_147193]                                                                                      | gene         | 1.42E-06 | 4.04E-02          | down                                 | -3.96            | 1188                |
| GLRX        | Homo sapiens glutaredoxin (thioltransferase) (GLRX), transcript variant 1, mRNA [NM_002064]                                                           | gene         | 5.47E-13 | 1.66E-08          | up                                   | 65.03            | 570                 |
| GLT1D1      | Homo sapiens glycosyltransferase 1 domain containing 1 (GLT1D1), mRNA [NM_144669]                                                                     | gene         | 1.86E-21 | 5.67E-17          | up                                   | 695.20           | 27                  |
| GLYTL3      | Homo sapiens glycine-N-acyltransferase-like 3 (GLYTL3), mRNA [NM_001010904]                                                                           | gene         | 2.68E-07 | 7.77E-03          | down                                 | -2.38            | 1250                |
| GMFG        | Homo sapiens glna maturation factor, gamma (GMFG), transcript variant 1, mRNA [NM_004877]                                                             | gene         | 1.06E-07 | 3.10E-03          | up                                   | 2.78             | 418                 |
| GNAQ        | Homo sapiens guanine nucleotide binding protein (G protein), q polypeptide (GNAQ), mRNA [NM_002072]                                                   | gene         | 1.81E-14 | 5.49E-10          | up                                   | 38.64            | 193                 |
| GNB4        | Homo sapiens guanine nucleotide binding protein (G protein), beta polypeptide 4 (GNB4), mRNA [NM_021629]                                              | gene         | 4.31E-07 | 1.24E-02          | up                                   | 22.12            | 528                 |
| GNG10       | Homo sapiens guanine nucleotide binding protein (G protein), gamma 10 (GNG10), transcript variant 1, mRNA [NM_001017998]                              | gene         | 2.67E-10 | 8.00E-06          | up                                   | 10.22            | 726                 |
| GNG10       | Homo sapiens guanine nucleotide binding protein (G protein), gamma 10 (GNG10), transcript variant 1, mRNA [NM_001017998]                              | gene         | 3.12E-07 | 9.04E-03          | up                                   | 3.79             | Not used            |
| GNGT2       | Homo sapiens guanine nucleotide binding protein (G protein), gamma transducing activity polypeptide 2 (GNGT2), transcript variant 1, mRNA [NM_031498] | gene         | 8.12E-10 | 2.43E-05          | up                                   | 18.67            | 706                 |
| GNLY        | granulysin [Source:HGNC Symbol;Acc:HGNC:4414] [ENST00000489214]                                                                                       | gene         | 1.43E-06 | 4.07E-02          | up                                   | 8.00             | 524                 |
| GNRH2       | Homo sapiens gonadotropin-releasing hormone 2 (GNRH2), transcript variant 2, mRNA [NM_178332]                                                         | gene         | 1.52E-07 | 4.44E-03          | down                                 | -4.58            | 1063                |
| GNRH2       | gonadotropin-releasing hormone 2 [Source:HGNC Symbol;Acc:HGNC:4420] [ENST00000380347]                                                                 | gene         | 9.67E-08 | 2.83E-03          | down                                 | -2.77            | Not used            |
| GNS         | Homo sapiens glucosamine (N-acetyl)-6-sulfatase (GNS), mRNA [NM_002076]                                                                               | gene         | 7.76E-07 | 2.23E-02          | up                                   | 4.15             | 470                 |
| GOLGA2P7    | Homo sapiens golgin A2 pseudogene 7 (GOLGA2P7), non-coding RNA [NR_027001]                                                                            | gene         | 1.98E-08 | 5.84E-04          | down                                 | -3.77            | 983                 |
| GOLGA7      | Homo sapiens golgin A7 (GOLGA7), transcript variant 2, mRNA [NM_01002296]                                                                             | gene         | 2.34E-10 | 7.02E-06          | up                                   | 4.72             | 472                 |
| GOLGA7      | Homo sapiens golgin A7 (GOLGA7), transcript variant 2, mRNA [NM_01002296]                                                                             | gene         | 1.35E-08 | 4.00E-04          | up                                   | 3.17             | Not used            |
| GOLGA7      | Homo sapiens golgin A7 (GOLGA7), transcript variant 2, mRNA [NM_01002296]                                                                             | gene         | 1.02E-08 | 3.02E-04          | up                                   | 2.98             | Not used            |
| GOLGA7B     | Homo sapiens golgin A7 family, member B (GOLGA7B), mRNA [NM_001030917]                                                                                | gene         | 6.39E-10 | 2.08E-05          | up                                   | 7.16             | 348                 |
| GOLM1       | Homo sapiens golgi membrane protein 1 (GOLM1), transcript variant 1, mRNA [NM_016548]                                                                 | gene         | 8.83E-12 | 2.66E-07          | up                                   | 11.86            | 691                 |
| GP33        | Homo sapiens glycoprotein A33 (transmembrane) (GP33), mRNA [NM_005814]                                                                                | gene         | 8.62E-07 | 2.47E-02          | up                                   | 12.77            | 529                 |
| GPATCH4     | G patch domain containing 4 [Source:HGNC Symbol;Acc:HGNC:25982] [ENST00000527691]                                                                     | gene         | 3.81E-07 | 1.10E-02          | down                                 | -2.72            | 1052                |
| GPR113      | Homo sapiens G protein-coupled receptor 113 (GPR113), transcript variant 3, mRNA [NM_153835]                                                          | gene         | 1.07E-06 | 3.06E-02          | down                                 | -3.15            | 1139                |
| GPR162      | Homo sapiens G protein-coupled receptor 162 (GPR162), transcript variant A-2, mRNA [NM_019858]                                                        | gene         | 7.27E-11 | 2.19E-06          | up                                   | 30.79            | 752                 |
| GPR176      | Homo sapiens G protein-coupled receptor 176 (GPR176), transcript variant 1, mRNA [NM_007223]                                                          | gene         | 5.24E-07 | 1.51E-02          | down                                 | -4.63            | 1186                |
| GRP25       | Homo sapiens G protein-coupled receptor 25 (GRP25), mRNA [NM_005298]                                                                                  | gene         | 1.20E-07 | 3.52E-03          | down                                 | -2.45            | 1078                |
| GRP56       | Homo sapiens G protein-coupled receptor 56 (GRP56), transcript variant 3, mRNA [NM_201525]                                                            | gene         | 3.22E-07 | 9.33E-03          | up                                   | 69.96            | 130                 |
| GRP65       | Homo sapiens G protein-coupled receptor 65 (GRP65), mRNA [NM_003608]                                                                                  | gene         | 8.43E-08 | 2.47E-03          | up                                   | 11.82            | 674                 |
| GRP78       | Homo sapiens G protein-coupled receptor 78 (GRP78), transcript variant 1, mRNA [NM_080819]                                                            | gene         | 1.67E-06 | 4.76E-02          | down                                 | -3.64            | 1032                |
| GRP84       | Homo sapiens G protein-coupled receptor 84 (GRP84), mRNA [NM_020370]                                                                                  | gene         | 3.34E-08 | 9.86E-04          | up                                   | 12.42            | 830                 |
| GRP97       | Homo sapiens G protein-coupled receptor 97 (GRP97), mRNA [NM_170776]                                                                                  | gene         | 1.64E-10 | 4.92E-06          | up                                   | 7.06             | 640                 |
| GPSM1       | Homo sapiens G-protein signaling modulator 1 (GPSM1), transcript variant 1, mRNA [NM_001145638]                                                       | gene         | 2.28E-07 | 6.62E-03          | down                                 | -3.12            | 890                 |
| GRB10       | Homo sapiens growth factor receptor-bound protein 10 (GRB10), transcript variant 4, mRNA [NM_001001555]                                               | gene         | 5.02E-12 | 1.51E-07          | up                                   | 25.77            | 83                  |
| GRB10       | Homo sapiens growth factor receptor-bound protein 10 (GRB10), transcript variant 4, mRNA [NM_001001555]                                               | gene         | 1.92E-12 | 5.81E-08          | up                                   | 14.40            | Not used            |
| GRHL2       | Homo sapiens grainyhead-like 2 (Drosophila) (GRHL2), mRNA [NM_024915]                                                                                 | gene         | 1.45E-08 | 4.29E-04          | down                                 | -3.59            | 1030                |
| GRIFIN      | Homo sapiens galectin-related inter-fiber protein (GRIFIN), mRNA [NM_001291784]                                                                       | gene         | 6.13E-07 | 1.76E-02          | down                                 | -2.71            | 1263                |
| GRK5        | G protein-coupled receptor kinase 5 [Source:HGNC Symbol;Acc:HGNC:4544] [ENST00000369108]                                                              | gene         | 1.30E-06 | 3.72E-02          | down                                 | -1.83            | 950                 |
| GSN         | Homo sapiens gelsolin (GSN), transcript variant 4, mRNA [NM_001127663]                                                                                | gene         | 1.13E-08 | 3.34E-04          | up                                   | 10.35            | 743                 |
| GSN         | Homo sapiens gelsolin (GSN), transcript variant 2, mRNA [NM_198252]                                                                                   | gene         | 1.35E-11 | 4.07E-07          | up                                   | 5.57             | Not used            |
| GYG1        | Homo sapiens glycogenin 1 (GYG1), transcript variant 1, mRNA [NM_004130]                                                                              | gene         | 1.03E-06 | 2.95E-02          | up                                   | 3.10             | 396                 |
| GZMA        | Homo sapiens granzyme A (granzyme 1), cytotoxic T-lymphocyte-associated serine esterase 3 (GZMA), mRNA [NM_006144]                                    | gene         | 7.74E-08 | 1.39E-03          | up                                   | 139.79           | 126                 |
| GZMB        | Homo sapiens granzyme B (granzyme 2), cytotoxic T-lymphocyte-associated serine esterase 3 (GZMB), mRNA [NM_004131]                                    | gene         | 6.92E-08 | 2.03E-03          | up                                   | 32.58            | 564                 |
| GZMH        | Homo sapiens granzyme H (cathepsin G-like 2, protein h-CCPX) (GZMH), transcript variant 1, mRNA [NM_033423]                                           | gene         | 1.67E-07 | 4.88E-03          | up                                   | 58.88            | 131                 |
| GZMK        | Homo sapiens granzyme K (granzyme 3, tryptase II) (GZMK), mRNA [NM_002104]                                                                            | gene         | 6.62E-09 | 1.97E-04          | up                                   | 84.50            | 127                 |
| H3F3A       | Homo sapiens H3 histone, family 3A (H3F3A), mRNA [NM_002107]                                                                                          | gene         | 1.12E-09 | 3.35E-05          | up                                   | 4.37             | 414                 |
| H3F3A       | Homo sapiens H3 histone, family 3A (H3F3A), mRNA [NM_002107]                                                                                          | gene         | 2.91E-10 | 8.72E-06          | up                                   | 4.26             | Not used            |
| H3F3A       | Homo sapiens H3 histone, family 3A (H3F3A), mRNA [NM_002107]                                                                                          | gene         | 9.16E-08 | 2.68E-03          | up                                   | 2.63             | Not used            |
| H3F3A       | Homo sapiens H3 histone, family 3A (H3F3A), mRNA [NM_002107]                                                                                          | gene         | 1.31E-08 | 3.88E-04          | up                                   | 2.54             | Not used            |
| HAL         | Homo sapiens histidine ammonia-lyase (HAL), transcript variant 1, mRNA [NM_002108]                                                                    | gene         | 2.81E-08 | 8.29E-04          | up                                   | 9.57             | 754                 |
| HAND1       | Homo sapiens heart and neural crest derivatives expressed 1 (HAND1), mRNA [NM_004821]                                                                 | gene         | 1.98E-07 | 5.76E-03          | down                                 | -4.85            | 1179                |
| HAP1        | Homo sapiens huntingtin-associated protein 1 (HAP1), transcript variant 2, mRNA [NM_177977]                                                           | gene         | 8.34E-07 | 2.39E-02          | down                                 | -2.87            | 1056                |
| HAPLN3      | Homo sapiens hyaluronan and proteoglycan link protein 3 (HAPLN3), mRNA [NM_178232]                                                                    | gene         | 1.84E-07 | 5.36E-03          | up                                   | 6.81             | 791                 |
| HBEFG       | Homo sapiens heparin-binding EGF-like growth factor (HBEFG), mRNA [NM_001945]                                                                         | gene         | 6.77E-11 | 2.03E-06          | up                                   | 15.19            | 594                 |
| HCAR3       | Homo sapiens hydroxycarboxylic acid receptor 3 (HCAR3), mRNA [NM_006018]                                                                              | gene         | 6.47E-16 | 1.97E-11          | up                                   | 951.02           | 3                   |
| HCK         | Homo sapiens HCK proto-oncogene, Src family tyrosine kinase (HCK), transcript variant 1, mRNA [NM_002110]                                             | gene         | 1.28E-11 | 3.86E-07          | up                                   | 53.63            | 553                 |
| HCN2        | Homo sapiens hyperpolarization activated cyclic nucleotide gated potassium channel 2 (HCN2), mRNA [NM_001194]                                         | gene         | 6.20E-09 | 1.84E-04          | down                                 | -13.77           | 879                 |
| HDAC4       | Homo sapiens histone deacetylase 4 (HDAC4), mRNA [NM_006037]                                                                                          | gene         | 1.62E-09 | 4.84E-05          | up                                   | 4.09             | 464                 |
| HDC         | Homo sapiens histidine decarboxylase (HDC), mRNA [NM_002112]                                                                                          | gene         | 4.61E-13 | 1.40E-08          | up                                   | 29.19            | 548                 |
| HDGFRP3     | Homo sapiens hepatoma-derived growth factor, related protein 3 (HDGFRP3), mRNA [NM_016073]                                                            | gene         | 2.23E-12 | 6.75E-08          | up                                   | 9.82             | 715                 |
| HEPH        | Homo sapiens hephaestin (HEPH), transcript variant 2, mRNA [NM_014799]                                                                                | gene         | 9.19E-07 | 2.63E-02          | down                                 | -2.27            | 1122                |
| HEY1        | Homo sapiens hes-related family bHLH transcription factor with YRPW motif 1 (HEY1), transcript variant 2, mRNA [NM_001040708]                         | gene         | 3.29E-09 | 9.80E-05          | up                                   | 15.49            | 234                 |
| HHLA2       | Homo sapiens HERV-H LTR-associating 2 (HHLA2), transcript variant 4, mRNA [NM_001282558]                                                              | gene         | 1.44E-06 | 4.09E-02          | down                                 | -4.33            | 1242                |
| HIF3A       | hypoxia inducible factor 3, alpha subunit [Source:HGNC Symbol;Acc:HGNC:15825] [ENST00000475432]                                                       | gene         | 1.72E-06 | 4.88E-02          | down                                 | -4.50            | 1224                |
| HIVFP3      | Homo sapiens human immunodeficiency virus type 1 enhancer binding protein 3 (HIVFP3), transcript variant 3, non-coding RNA [NR_038260]                | gene         | 6.47E-08 | 1.90E-03          | up                                   | 8.19             | 661                 |
| IJUIRP      | Homo sapiens Holliday junction recognition protein (IJUIRP), transcript variant 1, mRNA [NM_018410]                                                   | gene         | 2.48E-09 | 7.40E-05          | up                                   | 8.05             | 204                 |
| IK2         | Homo sapiens I-kappaB kinase 2 (IK2), mRNA [NM_0010189]                                                                                               | gene         | 1.04E-06 | 2.98E-02          | up                                   | 10.67            | 822                 |
| IK3         | Homo sapiens I-kappaB kinase 3 (white cell) (IK3), mRNA [NM_002115]                                                                                   | gene         | 2.45E-10 | 7.36E-06          | up                                   | 11.54            | 778                 |
| HLA-A       | Homo sapiens major histocompatibility complex, class I, A (HLA-A), transcript variant 2 (A*01:01:01:01 allele), mRNA [NM_001242758]                   | gene         | 1.74E-06 | 4.94E-02          | down                                 | -3.02            | 1227                |
| HLX         | Homo sapiens H2.0-like homeobox (HLX), mRNA [NM_0021958]                                                                                              | gene         | 4.15E-08 | 1.22E-03          | up                                   | 9.70             | 716                 |
| HMG20B      | Homo sapiens high mobility group 20B (HMG20B), mRNA [NM_006339]                                                                                       | gene         | 5.62E-07 | 1.62E-02          | down                                 | -3.01            | 1237                |
| HMG2A       | Homo sapiens high mobility group AT-hook 2 (HMG2A), transcript variant 3, mRNA [NM_001300918]                                                         | gene         | 1.61E-08 | 4.77E-04          | down                                 | -10.78           | 845                 |
| HMX1        | Homo sapiens H6 family homeobox 1 (HMX1), mRNA [NM_018942]                                                                                            | gene         | 4.10E-12 | 1.24E-07          | down                                 | -7.15            | 852                 |
| HMX3        | Homo sapiens H6 family homeobox 3 (HMX3), mRNA [NM_001105574]                                                                                         | gene         | 1.88E-07 | 5.47E-03          | down                                 | -3.51            | 1143                |
| HNMT        | Homo sapiens histamine N-methyltransferase (HNMT), transcript variant 2, mRNA [NM_001024074]                                                          | gene         | 1.71E-16 | 5.19E-12          | up                                   | 22.57            | 533                 |
| HNMT        | Homo sapiens histamine N-methyltransferase (HNMT), transcript variant 1, mRNA [NM_006895]                                                             | gene         | 1.60E-13 | 4.86E-09          | up                                   | 15.58            | Not used            |
| HNRNPA1     | Homo sapiens heterogeneous nuclear ribonucleoprotein A1 (HNRNPA1), transcript variant 1, mRNA [NM_002136]                                             | gene         | 1.61E-06 | 4.57E-02          | down                                 | -4.22            | 1260                |
| HOGA1       | 4-hydroxy-2-oxoglutarate aldolase 1 [Source:HGNC Symbol;Acc:HGNC:25155] [ENST00000465608]                                                             | gene         | 2.45E-08 | 7.25E-04          | down                                 | -3.66            | 1192                |
| HOPX        | Homo sapiens HOP homeobox (HOPX), transcript variant 2, mRNA [NM_139211]                                                                              | gene         | 1.57E-08 | 4.64E-04          | up                                   | 29.05            | 565                 |
| HOTAIR      | Homo sapiens HOX transcript antisense RNA (HOTAIR), transcript variant 3, long non-coding RNA [NR_047518]                                             | gene         | 4.67E-07 | 1.35E-02          | down                                 | -3.38            | 1027                |
| HOTAIR      | BROAD Institute lincRNA (HOTAIR), lincRNA [TCONS_00079053_HOTAIR]                                                                                     | lincRNA      | 4.16E-07 | 1.20E-02          | down                                 | -2.51            | Not used            |
| HOTAIR      | Homo sapiens HOX transcript antisense RNA (HOTAIR), transcript variant 1, long non-coding RNA [NR_047517]                                             | ncRNA        | 1.50E-06 | 4.26E-02          | down                                 | -2.07            | Not used            |
| HOXA10      | Homo sapiens homeobox A10 (HOXA10), transcript variant 1, mRNA [NM_018951]                                                                            | gene         | 5.51E-07 | 1.59E-02          | down                                 | -5.54            | 847                 |
| HP          | Homo sapiens haptoglobin (HP), transcript variant 1, mRNA [NM_005143]                                                                                 | gene         | 2.10E-08 | 6.21E-04          | up                                   | 16.49            | 200                 |
| HPS1        | Homo sapiens Hermansky-Pudlak syndrome 1 (HPS1), transcript variant 3, mRNA [NM_182639]                                                               | gene         | 4.47E-07 | 1.29E-02          | down                                 | -2.53            | 1077                |
| HPSE        | Homo sapiens heparanase (HPSE), transcript variant 1, mRNA [NM_006665]                                                                                | gene         | 3.51E-09 | 1.05E-04          | up                                   | 26.23            | 258                 |
| HR          | Homo sapiens hair growth associated (HR), transcript variant 1, mRNA [NM_005144]                                                                      | gene         | 9.40E-07 | 2.69E-02          | down                                 | -2.51            | 917                 |
| HR          | Homo sapiens hair growth associated (HR), transcript variant 1, mRNA [NM_005144]                                                                      | gene         | 1.13E-06 | 3.24E-02          | down                                 | -2.09            | Not used            |
| HS3ST3B1    | Homo sapiens heparan sulfate glucosaminyl 3-O-sulfotransferase 3B1 (HS3ST3B1), transcript variant 1, mRNA [NM_006041]                                 | gene         | 4.10E-11 | 1.23E-06          | up                                   | 13.73            | 368                 |
| HSP         | Homo sapiens heat shock transcription factor 1 (HSP1), mRNA [NM_005526]                                                                               | gene         | 1.25E-06 | 3.59E-02          | down                                 | -1.51            | 1110                |
| HSPA1A      | Homo sapiens heat shock 70kDa protein 1A (HSPA1A), mRNA [NM_005345]                                                                                   | gene         | 1.71E-06 | 4.85E-02          | up                                   | 12.00            | 803                 |
| HTR3A       | Homo sapiens 5-hydroxytryptamine (serotonin) receptor 3A, ionotropic (HTR3A), transcript variant 1, mRNA [NM_213621]                                  | gene         | 1.68E-06 | 4.78E-02          | down                                 | -4.50            | 1247                |
| ICAM1       | Homo sapiens intercellular adhesion molecule 1 (ICAM1), mRNA [NM_000201]                                                                              | gene         | 1.51E-06 | 4.31E-02          | up                                   | 16.94            | 121                 |
| ID2         | Homo sapiens inhibitor of DNA binding 2, dominant negative helix-loop-helix protein (ID2), mRNA [NM_002166]                                           | gene         | 3.69E-11 | 1.11E-06          | up                                   | 62.82            | 110                 |
| ID2         | Homo sapiens inhibitor of DNA binding 2, dominant negative helix-loop-helix protein (ID2), mRNA [NM_002166]                                           | gene         | 9.37E-09 | 2.78E-04          | up                                   | 45.29            | Not used            |
| IER3        | Homo sapiens immediate early response 3 (IER3), mRNA [NM_003897]                                                                                      | gene         | 5.18E-08 | 1.52E-03          | up                                   | 25.65            | 122                 |
| IER3        | Homo sapiens immediate early response 3 (IER3), mRNA [NM_003897]                                                                                      | gene         | 8.38E-07 | 2.40E-02          | up                                   | 23.59            | Not used            |
| IER5L       | Homo sapiens immediate early response 5-like (IER5L), mRNA [NM_203434]                                                                                | gene         | 7.96E-07 | 2.28E-02          | up                                   | 5.57             | 205                 |
| IER5L       | Homo sapiens immediate early response 5-like (IER5L), mRNA [NM_203434]                                                                                | gene         | 1.49E-08 | 4.41E-04          | down                                 | -2.61            | Not used            |
| IFI30       | Homo sapiens interferon, gamma-inducible protein 30 (IFI30), mRNA [NM_006332]                                                                         | gene         | 1.54E-09 | 4.61E-05          | up                                   | 25.27            | 309                 |
| IFIT1       | Homo sapiens interferon-induced protein with tetratricopeptide repeats 1 (IFIT1), transcript variant 1, mRNA [NM_001548]                              | gene         | 2.74E-09 | 8.17E-05          | up                                   | 86.58            | 165                 |
| IFIT2       | Homo sapiens interferon-induced protein with tetratricopeptide repeats 2 (IFIT2), mRNA [NM_001547]                                                    | gene         | 1.56E-06 | 4.45E-02          | up                                   | 14.76            | 788                 |
| IFIT3       | Homo sapiens interferon-induced protein with tetratricopeptide repeats 3 (IFIT3), transcript variant 3, mRNA [NM_001289758]                           | gene         | 2.56E-09 | 7.64E-05          | up                                   | 96.66            | 166                 |
| IFITM2      | Homo sapiens interferon induced transmembrane protein 2 (IFITM2), mRNA [NM_006435]                                                                    | gene         | 6.50E-11 | 1.95E-06          | up                                   | 17.24            | 615                 |
| IFITM3      | Homo sapiens interferon induced transmembrane protein 3 (IFITM3), transcript variant 1, mRNA [NM_021034]                                              | gene         | 3.01E-10 | 9.04E-06          | up                                   | 14.32            | 616                 |
| IFITM4P     | Homo sapiens interferon induced transmembrane protein 4 pseudogene (IFITM4P), non-coding RNA [NR_001590]                                              | gene         | 2.99E-09 | 8.91E-05          | up                                   | 11.03            | 617                 |
| IFNA4       | Homo sapiens interferon, alpha 4 (IFNA4), mRNA [NM_021068]                                                                                            | gene         | 3.84E-07 | 1.11E-            |                                      |                  |                     |

| Gene Symbol | Description                                                                                                                                      | Feature Type | p-value  | Corrected p-value | Regulation in NOTCH1-mut | Fold change (Mut vs WT) | Position in Heatmap |
|-------------|--------------------------------------------------------------------------------------------------------------------------------------------------|--------------|----------|-------------------|--------------------------|-------------------------|---------------------|
| IL32        | Homo sapiens interleukin 32 (IL32), transcript variant 4, mRNA [NM_001012633]                                                                    | gene         | 2.65E-09 | 7.91E-05          | up                       | 10.09                   | Not used            |
| IL3RA       | Homo sapiens interleukin 3 receptor, alpha (low affinity) (IL3RA), transcript variant 1, mRNA [NM_002183]                                        | gene         | 4.23E-07 | 1.22E-02          | up                       | 6.20                    | 808                 |
| IL7R        | Homo sapiens interleukin 7 receptor (IL7R), transcript variant 1, mRNA [NM_002185]                                                               | gene         | 8.06E-10 | 2.41E-05          | up                       | 152.49                  | 142                 |
| ILDR1       | Homo sapiens immunoglobulin-like domain containing receptor 1 (ILDR1), transcript variant 2, mRNA [NM_175924]                                    | gene         | 1.70E-06 | 4.83E-02          | down                     | -2.68                   | 1229                |
| IMPA2       | Homo sapiens inositol(myo)-1(or 4)-monophosphatase 2 (IMPA2), mRNA [NM_014214]                                                                   | gene         | 7.71E-08 | 2.26E-03          | up                       | 14.33                   | 741                 |
| IMPA2       | Homo sapiens inositol(myo)-1(or 4)-monophosphatase 2 (IMPA2), mRNA [NM_014214]                                                                   | gene         | 9.62E-09 | 2.85E-04          | up                       | 12.12                   | Not used            |
| INHBA       | Homo sapiens inhibin, beta A (INHBA), mRNA [NM_002192]                                                                                           | gene         | 4.82E-08 | 1.42E-03          | up                       | 6.76                    | 213                 |
| INHBB       | Homo sapiens inhibin, beta B (INHBB), mRNA [NM_002193]                                                                                           | gene         | 6.80E-07 | 1.95E-02          | up                       | 7.19                    | 643                 |
| INHBE       | Homo sapiens inhibin, beta E (INHBE), mRNA [NM_031479]                                                                                           | gene         | 1.46E-06 | 4.17E-02          | down                     | -2.36                   | 992                 |
| INIP        | Homo sapiens INT53 and NABP interacting protein (INIP), mRNA [NM_021218]                                                                         | gene         | 4.63E-07 | 1.34E-02          | up                       | 2.07                    | 434                 |
| INPP4B      | Homo sapiens inositol polyphosphate 4-phosphatase, type II, 105kDa (INPP4B), transcript variant 1, mRNA [NM_003866]                              | gene         | 4.55E-10 | 1.36E-05          | up                       | 29.65                   | 767                 |
| IQSEC2      | Homo sapiens IQ motif and Sec7 domain 2 (IQSEC2), transcript variant 3, mRNA [NM_001243197]                                                      | gene         | 2.67E-09 | 7.97E-05          | up                       | 14.17                   | 789                 |
| IQSEC2      | Homo sapiens IQ motif and Sec7 domain 2 (IQSEC2), transcript variant 2, mRNA [NM_015075]                                                         | gene         | 1.38E-08 | 4.10E-04          | down                     | -2.78                   | Not used            |
| IQSEC3      | Homo sapiens IQ motif and Sec7 domain 3 (IQSEC3), transcript variant 1, mRNA [NM_001170738]                                                      | gene         | 1.59E-07 | 4.63E-03          | down                     | -3.52                   | 980                 |
| IRAK3       | Homo sapiens interleukin-1 receptor-associated kinase 3 (IRAK3), transcript variant 1, mRNA [NM_007199]                                          | gene         | 1.22E-11 | 3.69E-07          | up                       | 80.28                   | 38                  |
| IRF2BP2     | Homo sapiens interferon regulatory factor 2 binding protein 2 (IRF2BP2), transcript variant 1, mRNA [NM_182972]                                  | gene         | 9.40E-08 | 2.75E-03          | up                       | 3.21                    | 442                 |
| IRG1        | Homo sapiens immunoresponsive 1 homolog (mouse) (IRG1), mRNA [NM_00128406]                                                                       | gene         | 1.78E-10 | 5.33E-06          | down                     | -3.50                   | 1151                |
| ITGA6       | Homo sapiens integrin, alpha 6 (ITGA6), transcript variant 2, mRNA [NM_000210]                                                                   | gene         | 7.05E-10 | 2.11E-05          | up                       | 20.66                   | 731                 |
| ITGA6       | Homo sapiens integrin, alpha 6 (ITGA6), transcript variant 2, mRNA [NM_000210]                                                                   | gene         | 6.77E-11 | 2.04E-06          | up                       | 67.07                   | Not used            |
| ITGB2       | Homo sapiens integrin, beta 2 (complement component 3 receptor 3 and 4 subunit) (ITGB2), transcript variant 1, mRNA [NM_000211]                  | gene         | 3.36E-10 | 1.01E-05          | up                       | 26.66                   | 546                 |
| ITGB2       | integrin, beta 2 (complement component 3 receptor 3 and 4 subunit) [Source:HGNC Symbol;Acc:HGNC:6155] [ENST00000610622]                          | gene         | 2.11E-11 | 6.36E-07          | up                       | 7.70                    | Not used            |
| ITK         | Homo sapiens IZL-inducible T-cell kinase (ITK), mRNA [NM_005546]                                                                                 | gene         | 1.59E-11 | 4.79E-07          | up                       | 66.06                   | 576                 |
| ITTM2B      | Homo sapiens integral membrane protein 2B (ITTM2B), mRNA [NM_021999]                                                                             | gene         | 3.00E-08 | 8.84E-04          | up                       | 5.92                    | 400                 |
| JAKMIP1     | Homo sapiens janus kinase and microtubule interacting protein 1 (JAKMIP1), transcript variant 2, mRNA [NM_144720]                                | gene         | 4.89E-09 | 1.46E-04          | up                       | 24.45                   | 627                 |
| JUND        | Homo sapiens Jun D proto-oncogene (JUND), transcript variant 1, mRNA [NM_001286968]                                                              | gene         | 7.80E-07 | 2.24E-02          | down                     | -6.47                   | 1073                |
| KANK3       | KN motif and ankyrin repeat domains 3 [Source:HGNC Symbol;Acc:HGNC:24796] [ENST00000610351]                                                      | gene         | 1.36E-06 | 3.87E-02          | down                     | -2.34                   | 966                 |
| KCNAG6      | Homo sapiens potassium channel, voltage gated shaker related subfamily A, member 6 (KCNAG6), mRNA [NM_002235]                                    | gene         | 2.54E-07 | 7.37E-03          | up                       | 4.69                    | 394                 |
| KCNCA4      | Homo sapiens potassium channel, voltage gated Shaw related subfamily C, member 4 (KCNCA4), transcript variant 3, mRNA [NM_001039574]             | gene         | 2.83E-09 | 8.43E-05          | down                     | -3.02                   | 1199                |
| KCNDB3      | potassium voltage-gated channel, Shal-related subfamily, member 3 [Source:HGNC Symbol;Acc:HGNC:6239] [ENST00000369697]                           | gene         | 4.03E-07 | 1.17E-02          | down                     | -1.87                   | 951                 |
| KCNEB3      | Homo sapiens potassium channel, voltage gated subfamily E regulatory beta subunit 3 (KCNEB3), mRNA [NM_005472]                                   | gene         | 2.49E-13 | 7.55E-09          | up                       | 80.87                   | 294                 |
| KCNJ15      | Homo sapiens potassium channel, inwardly rectifying subfamily J, member 15 (KCNJ15), transcript variant 1, mRNA [NM_170736]                      | gene         | 4.40E-10 | 1.32E-05          | up                       | 52.89                   | 174                 |
| KCNJ15      | Homo sapiens potassium channel, inwardly rectifying subfamily J, member 15 (KCNJ15), transcript variant 1, mRNA [NM_170736]                      | gene         | 3.95E-11 | 1.19E-06          | up                       | 21.22                   | Not used            |
| KCNJ2       | Homo sapiens potassium channel, inwardly rectifying subfamily J, member 2 (KCNJ2), mRNA [NM_000891]                                              | gene         | 3.86E-07 | 1.12E-02          | up                       | 49.71                   | 527                 |
| KCNQ2       | Homo sapiens potassium channel, voltage gated KQT-like subfamily Q, member 2 (KCNQ2), transcript variant 5, mRNA [NM_172109]                     | gene         | 2.14E-07 | 6.23E-03          | down                     | -8.37                   | 846                 |
| KCNT1       | Homo sapiens cDNA FLJ1282 fis, clone BRAAMY2037823. [AK123276]                                                                                   | gene         | 7.55E-09 | 2.24E-04          | down                     | -3.19                   | 1010                |
| KCP         | Homo sapiens kiellin/chordin-like protein (KCP), transcript variant 2, mRNA [NM_199349]                                                          | gene         | 1.25E-06 | 3.56E-02          | down                     | -3.72                   | 1042                |
| KCTD12      | Homo sapiens potassium channel tetramerization domain containing 12 (KCTD12), mRNA [NM_138444]                                                   | gene         | 8.28E-12 | 2.50E-07          | up                       | 133.69                  | 167                 |
| KCTD12      | Homo sapiens potassium channel tetramerization domain containing 12 (KCTD12), mRNA [NM_138444]                                                   | gene         | 1.90E-12 | 5.73E-08          | up                       | 86.36                   | Not used            |
| KDM8        | Homo sapiens lysine (K)-specific demethylase 8 (KDM8), transcript variant 1, mRNA [NM_001145348]                                                 | gene         | 5.89E-07 | 1.69E-02          | down                     | -2.08                   | 920                 |
| KIAA0513    | Homo sapiens KIAA0513 (KIAA0513), transcript variant 2, mRNA [NM_014732]                                                                         | gene         | 8.49E-14 | 2.57E-09          | up                       | 33.07                   | 613                 |
| KIAA1257    | Homo sapiens KIAA1257 (KIAA1257), mRNA [NM_020741]                                                                                               | gene         | 8.06E-13 | 2.44E-08          | up                       | 27.60                   | 634                 |
| KIAA1324    | Homo sapiens KIAA1324 (KIAA1324), transcript variant 1, mRNA [NM_020775]                                                                         | gene         | 3.95E-09 | 1.18E-04          | up                       | 18.76                   | 797                 |
| KIAA1324    | Homo sapiens KIAA1324 (KIAA1324), transcript variant 1, mRNA [NM_020775]                                                                         | gene         | 6.59E-07 | 1.89E-02          | up                       | 7.59                    | Not used            |
| KIAA1598    | Homo sapiens KIAA1598 (KIAA1598), transcript variant 2, mRNA [NM_018330]                                                                         | gene         | 1.00E-06 | 2.86E-02          | up                       | 19.26                   | 520                 |
| KIAA1671    | Homo sapiens KIAA1671 (KIAA1671), mRNA [NM_00145206]                                                                                             | gene         | 1.51E-06 | 4.30E-02          | down                     | -3.15                   | Not used            |
| KIAA1671    | Homo sapiens KIAA1671 (KIAA1671), mRNA [NM_00145206]                                                                                             | gene         | 9.71E-07 | 2.78E-02          | up                       | 16.50                   | 771                 |
| KIF16B      | Homo sapiens kinesin family member 16B (KIF16B), transcript variant 1, mRNA [NM_001199866]                                                       | gene         | 1.62E-06 | 4.61E-02          | down                     | -4.60                   | 1070                |
| KIF26B      | Homo sapiens kinesin family member 26B (KIF26B), mRNA [NM_018012]                                                                                | gene         | 8.04E-08 | 2.36E-03          | down                     | -2.90                   | 1210                |
| KIR2DS2     | Homo sapiens killer cell immunoglobulin-like receptor, two domains, short cytoplasmic tail, 2 (KIR2DS2), transcript variant 1, mRNA [NM_012312]  | gene         | 5.94E-07 | 1.71E-02          | up                       | 13.12                   | 315                 |
| KIR3DL2     | Homo sapiens killer cell immunoglobulin-like receptor, three domains, long cytoplasmic tail, 2 (KIR3DL2), transcript variant 1, mRNA [NM_006737] | gene         | 2.61E-08 | 7.69E-04          | up                       | 5.27                    | 207                 |
| KIRREL2     | Homo sapiens kin of IRRE like 2 (Drosophila) (KIRREL2), transcript variant 3, mRNA [NM_199180]                                                   | gene         | 7.90E-07 | 2.27E-02          | down                     | -2.20                   | 994                 |
| KLF13       | Homo sapiens Kruppel-like factor 13 (KLF13), transcript variant 1, mRNA [NM_015995]                                                              | gene         | 6.77E-07 | 1.95E-02          | up                       | 1.87                    | 423                 |
| KLF17       | Homo sapiens Kruppel-like factor 17 (KLF17), mRNA [NM_173484]                                                                                    | gene         | 4.04E-07 | 1.17E-02          | down                     | -1.94                   | 1096                |
| KLF5        | Homo sapiens Kruppel-like factor 5 (intestinal) (KLF5), transcript variant 1, mRNA [NM_001730]                                                   | gene         | 6.42E-10 | 1.92E-05          | up                       | 8.40                    | 212                 |
| KLRB1       | Homo sapiens killer cell lectin-like receptor subfamily B, member 1 (KLRB1), mRNA [NM_002258]                                                    | gene         | 1.50E-08 | 4.44E-04          | up                       | 47.78                   | 575                 |
| KLRC1       | Homo sapiens killer cell lectin-like receptor subfamily C, member 1 (KLRC1), transcript variant 1, mRNA [NM_002259]                              | gene         | 1.46E-08 | 4.32E-04          | up                       | 25.42                   | 561                 |
| KLRC3       | Homo sapiens killer cell lectin-like receptor subfamily C, member 3 (KLRC3), transcript variant 2, mRNA [NM_007333]                              | gene         | 1.41E-08 | 4.18E-04          | up                       | 11.48                   | 525                 |
| KLRC4       | Homo sapiens killer cell lectin-like receptor subfamily C, member 4 (KLRC4), mRNA [NM_013431]                                                    | gene         | 9.74E-08 | 2.85E-03          | up                       | 8.85                    | 718                 |
| KLRD1       | Homo sapiens killer cell lectin-like receptor subfamily D, member 1 (KLRD1), transcript variant 1, mRNA [NM_002262]                              | gene         | 1.87E-10 | 5.61E-06          | up                       | 37.60                   | Not used            |
| KLRD1       | Homo sapiens killer cell lectin-like receptor subfamily D, member 1 (KLRD1), transcript variant 1, mRNA [NM_002262]                              | gene         | 1.77E-07 | 5.16E-03          | up                       | 41.29                   | 190                 |
| KLRG1       | Homo sapiens killer cell lectin-like receptor subfamily G, member 1 (KLRG1), mRNA [NM_005810]                                                    | gene         | 2.48E-10 | 7.43E-06          | up                       | 13.03                   | Not used            |
| KLRG1       | Homo sapiens killer cell lectin-like receptor subfamily G, member 1 (KLRG1), mRNA [NM_005810]                                                    | gene         | 2.50E-07 | 7.27E-03          | up                       | 18.63                   | 687                 |
| KLRK1       | Homo sapiens killer cell lectin-like receptor subfamily K, member 1 (KLRK1), mRNA [NM_007360]                                                    | gene         | 2.88E-11 | 8.67E-07          | up                       | 31.24                   | 192                 |
| KMT2E-AS1   | Homo sapiens KMT2E antisense RNA 1 (head to head) (KMT2E-AS1), long non-coding RNA [NR_024586]                                                   | ncRNA        | 1.18E-06 | 3.37E-02          | down                     | -2.37                   | Not used            |
| KRAB2       | Homo sapiens KRAB-A domain containing 2 (KRAB2), mRNA [NM_213597]                                                                                | gene         | 9.41E-07 | 2.69E-02          | down                     | -2.21                   | 1099                |
| KRMEM1      | Homo sapiens krigling containing transmembrane protein 1 (KRMEM1), transcript variant 3, mRNA [NM_001039570]                                     | gene         | 7.59E-08 | 2.30E-08          | up                       | 63.27                   | 89                  |
| KRT17P5     | Homo sapiens keratin 17 pseudogene 5 (KRT17P5), non-coding RNA [NR_001443]                                                                       | gene         | 9.92E-08 | 2.90E-03          | down                     | -2.79                   | 999                 |
| KRT19       | Homo sapiens keratin 19, type I (KRT19), mRNA [NM_002276]                                                                                        | gene         | 9.43E-07 | 2.70E-02          | down                     | -3.37                   | 1217                |
| KRT23       | Homo sapiens keratin 23, type I (KRT23), transcript variant 1, mRNA [NM_015515]                                                                  | gene         | 2.13E-16 | 6.49E-12          | up                       | 20.63                   | Not used            |
| KRT23       | Homo sapiens keratin 23, type I (KRT23), transcript variant 1, mRNA [NM_015515]                                                                  | gene         | 1.81E-18 | 5.52E-14          | up                       | 237.26                  | 181                 |
| KRT7        | Homo sapiens keratin 7, type II (KRT7), mRNA [NM_005556]                                                                                         | gene         | 5.47E-07 | 1.58E-02          | down                     | -3.02                   | 1003                |
| KRT81       | Homo sapiens keratin 81, type II (KRT81), mRNA [NM_002281]                                                                                       | gene         | 8.33E-08 | 2.44E-03          | down                     | -3.36                   | 1000                |
| KRT85       | Homo sapiens keratin 85, type II (KRT85), transcript variant 1, mRNA [NM_002283]                                                                 | gene         | 1.35E-07 | 3.93E-03          | down                     | -3.43                   | 1194                |
| KRT8P41     | Homo sapiens keratin 8 pseudogene 41 (KRT8P41), non-coding RNA [NR_027713]                                                                       | gene         | 1.04E-06 | 2.98E-02          | down                     | -2.27                   | 1085                |
| KRTAP10-10  | Homo sapiens keratin associated protein 10-10 (KRTAP10-10), mRNA [NM_181688]                                                                     | gene         | 5.38E-07 | 1.55E-02          | down                     | -2.28                   | 925                 |
| KRTAP19-5   | Homo sapiens keratin associated protein 19-5 (KRTAP19-5), mRNA [NM_181611]                                                                       | gene         | 5.56E-07 | 1.60E-02          | down                     | -2.55                   | 918                 |
| KRTAP2-4    | Homo sapiens keratin associated protein 2-4 (KRTAP2-4), mRNA [NM_033184]                                                                         | gene         | 8.20E-10 | 2.45E-05          | down                     | -6.36                   | 855                 |
| KRTAP3-11   | Homo sapiens keratin associated protein 3-11 (KRTAP3-11), mRNA [NM_031958]                                                                       | gene         | 9.06E-08 | 2.65E-03          | down                     | -3.21                   | 1039                |
| KRTAP5-11   | keratin associated protein 5-11 [Source:HGNC Symbol;Acc:HGNC:23606] [ENST00000617152]                                                            | gene         | 2.72E-07 | 7.90E-03          | down                     | -2.14                   | 926                 |
| KRTAP6-1    | Homo sapiens keratin associated protein 6-1 (KRTAP6-1), mRNA [NM_181602]                                                                         | gene         | 8.48E-07 | 2.43E-02          | down                     | -2.14                   | 952                 |
| LACTB       | Homo sapiens lactamase, beta (LACTB), transcript variant 2, mRNA [NM_171846]                                                                     | gene         | 6.55E-07 | 1.88E-02          | up                       | 3.70                    | 347                 |
| LAIR2       | Homo sapiens leukocyte-associated immunoglobulin-like receptor 2 (LAIR2), transcript variant 1, mRNA [NM_002288]                                 | gene         | 1.57E-09 | 4.68E-05          | up                       | 26.05                   | 302                 |
| LAMB1       | laminin, beta 1 [Source:HGNC Symbol;Acc:HGNC:6486] [ENST00000393559]                                                                             | gene         | 1.24E-07 | 3.62E-03          | down                     | -3.12                   | 1195                |
| LAMB3       | Homo sapiens laminin, beta 3 (LAMB3), transcript variant 2, mRNA [NM_001017402]                                                                  | gene         | 5.02E-08 | 1.47E-03          | up                       | 13.97                   | 831                 |
| LAMP2       | Homo sapiens lysosomal-associated membrane protein 2 (LAMP2), transcript variant C, mRNA [NM_001122606]                                          | gene         | 3.44E-10 | 1.03E-05          | up                       | 3.79                    | Not used            |
| LAMP2       | Homo sapiens lysosomal-associated membrane protein 2 (LAMP2), transcript variant B, mRNA [NM_013995]                                             | gene         | 8.73E-07 | 2.50E-02          | up                       | 4.09                    | 444                 |
| LAT2        | linker for activation of T cells family, member 2 [Source:HGNC Symbol;Acc:HGNC:12749] [ENST00000398475]                                          | gene         | 6.48E-08 | 1.90E-03          | down                     | -2.19                   | 1097                |
| LBR         | Homo sapiens lamin B receptor (LBR), transcript variant 1, mRNA [NM_002296]                                                                      | gene         | 3.50E-10 | 1.05E-05          | up                       | 5.04                    | 465                 |
| LBR1        | Homo sapiens ladybird homeobox 1 (LBR1), mRNA [NM_006562]                                                                                        | gene         | 6.23E-10 | 1.86E-05          | down                     | -4.33                   | 859                 |
| LCE1C       | Homo sapiens late cornified envelope 1C (LCE1C), transcript variant 1, mRNA [NM_178351]                                                          | gene         | 6.39E-07 | 1.84E-02          | down                     | -2.59                   | 1005                |
| LCE3B       | Homo sapiens late cornified envelope 3B (LCE3B), mRNA [NM_178433]                                                                                | gene         | 4.85E-07 | 1.40E-02          | down                     | -3.06                   | 1057                |
| LCE6A       | Homo sapiens late cornified envelope 6A (LCE6A), mRNA [NM_001128600]                                                                             | gene         | 4.90E-10 | 1.29E-05          | down                     | -5.10                   | 1178                |
| LCN2        | Homo sapiens lipocalin 2 (LCN2), mRNA [NM_005564]                                                                                                | gene         | 9.79E-11 | 2.94E-06          | up                       | 78.66                   | 146                 |
| LCP1        | Homo sapiens lymphocyte cytosolic protein 1 (L-plastin) (LCP1), mRNA [NM_002298]                                                                 | gene         | 2.89E-08 | 8.51E-04          | up                       | 5.80                    | 474                 |
| LDHA        | Homo sapiens lactate dehydrogenase A (LDHA), transcript variant 1, mRNA [NM_005566]                                                              | gene         | 1.74E-06 | 4.94E-02          | up                       | 3.26                    | 817                 |
| LDLR        | Homo sapiens low density lipoprotein receptor (LDLR), transcript variant 1, mRNA [NM_000527]                                                     | gene         | 9.57E-11 | 2.88E-06          | up                       | 25.93                   | 36                  |
| LGALS12     | Homo sapiens lectin, galactoside-binding, soluble, 12 (LGALS12), transcript variant 2, mRNA [NM_033101]                                          | gene         | 6.17E-10 | 1.85E-05          | up                       | 5.95                    | 323                 |
| LGALS2      | Homo sapiens lectin, galactoside-binding, soluble, 2 (LGALS2), mRNA [NM_006498]                                                                  | gene         | 3.85E-09 | 1.15E-04          | up                       | 83.25                   | 164                 |
| LGALS3      | Homo sapiens lectin, galactoside-binding, soluble, 3 (LGALS3), transcript variant 1, mRNA [NM_002306]                                            | gene         | 1.93E-11 | 5.82E-07          | up                       | 46.99                   | 834                 |
| LHX3        | Homo sapiens LIM homeobox 3 (LHX3), transcript variant 2, mRNA [NM_014564]                                                                       | gene         | 5.95E-11 | 1.79E-06          | down                     | -18.57                  | 877                 |
| LILRA2      | Homo sapiens leukocyte immunoglobulin-like receptor, subfamily A (with TM domain), member 2 (LILRA2), transcript variant 2, mRNA [NM_006866]     | gene         | 2.15E-09 | 6.42E-05          | up                       | 20.17                   | 683                 |
| LILRA3      | Homo sapiens leukocyte immunoglobulin-like receptor, subfamily A (without TM domain), member 3 (LILRA3), transcript variant 1, mRNA [NM_006865]  | gene         | 2.17E-07 | 6.31E-03          | up                       | 6.15                    | 667                 |
| LILRA5      | Homo sapiens leukocyte immunoglobulin-like receptor, subfamily A (with TM domain), member 5 (LILRA5), transcript variant 3, mRNA [NM_181879]     | gene         | 4.55E-15 | 1.38E-10          | up                       | 39.39                   | 537                 |
| LILRA6      | Homo sapiens leukocyte immunoglobulin-like receptor, subfamily A (with TM domain), member 6 (LILRA6), transcript variant 2, mRNA [NM_104098]     | gene         | 1.04E-17 | 3.15E-13          | up                       | 374.35                  | 45                  |
| LILRA6      | Homo sapiens leukocyte immunoglobulin-like receptor, subfamily A (with TM domain), member 6 (LILRA6), transcript variant 1, mRNA [NM_024318]     | gene         | 6.06E-07 | 1.74E-02          |                          |                         |                     |

| Gene Symbol        | Description                                                                                                                 | Feature Type        | p-value  | Corrected p-value | Regulation in NOTCH1-mut | Fold change (Mut vs WT) | Position in Heatmap |
|--------------------|-----------------------------------------------------------------------------------------------------------------------------|---------------------|----------|-------------------|--------------------------|-------------------------|---------------------|
| LINC00707          | Homo sapiens long intergenic non-protein coding RNA 707 [LINC00707], long non-coding RNA [NR_038921]                        | rRNA                | 5.94E-07 | 1.71E-02          | down                     | -3.36                   | Not used            |
| LINC00861          | long intergenic non-protein coding RNA 861 [Source:HGNC Symbol;Acc:HGNC:45133] [ENST00000518291]                            | long intergenic RNA | 1.09E-07 | 3.19E-03          | down                     | -2.24                   | Not used            |
| LINC00877          | Homo sapiens long intergenic non-protein coding RNA 877 [LINC00877], long non-coding RNA [NR_104116]                        | rRNA                | 1.32E-15 | 4.00E-11          | up                       | 39.59                   | Not used            |
| LINC00877          | long intergenic non-protein coding RNA 877 [Source:HGNC Symbol;Acc:HGNC:27706] [ENST00000469218]                            | long intergenic RNA | 7.27E-08 | 2.13E-03          | down                     | -2.77                   | Not used            |
| LINC00892          | Homo sapiens long intergenic non-protein coding RNA 892 [LINC00892], transcript variant 1, long non-coding RNA [NR_038461]  | rRNA                | 1.46E-06 | 4.15E-02          | up                       | 13.43                   | Not used            |
| LINC00892          | Homo sapiens long intergenic non-protein coding RNA 892 [LINC00892], transcript variant 1, long non-coding RNA [NR_038461]  | rRNA                | 3.15E-10 | 9.43E-06          | up                       | 24.33                   | Not used            |
| LINC00908          | Homo sapiens long intergenic non-protein coding RNA 908 [LINC00908], long non-coding RNA [NR_015417]                        | rRNA                | 2.30E-07 | 6.70E-03          | down                     | -4.49                   | Not used            |
| LINC00908          | long intergenic non-protein coding RNA 908 [Source:HGNC Symbol;Acc:HGNC:27599] [ENST00000582452]                            | long intergenic RNA | 4.33E-07 | 1.25E-02          | down                     | -4.20                   | Not used            |
| LINC00917          | long intergenic non-protein coding RNA 917 [Source:HGNC Symbol;Acc:HGNC:48607] [ENST00000600892]                            | long intergenic RNA | 1.76E-07 | 5.14E-03          | down                     | -3.70                   | Not used            |
| LINC00937          | Homo sapiens long intergenic non-protein coding RNA 937 [LINC00937], long non-coding RNA [NR_024420]                        | rRNA                | 4.67E-11 | 1.41E-06          | up                       | 72.75                   | Not used            |
| LINC00937          | Homo sapiens long intergenic non-protein coding RNA 937 [LINC00937], long non-coding RNA [NR_024420]                        | rRNA                | 1.11E-09 | 3.31E-05          | up                       | 75.76                   | Not used            |
| LINC00963          | long intergenic non-protein coding RNA 963 [Source:HGNC Symbol;Acc:HGNC:48716] [ENST00000419300]                            | long intergenic RNA | 1.38E-08 | 4.07E-04          | up                       | 9.16                    | Not used            |
| LINC00963          | long intergenic non-protein coding RNA 963 [Source:HGNC Symbol;Acc:HGNC:48716] [ENST00000419300]                            | long intergenic RNA | 7.78E-09 | 2.21E-04          | down                     | -3.26                   | Not used            |
| LINC01000          | capicua transcriptional repressor pseudogene 27 [Source:HGNC Symbol;Acc:HGNC:48835] [ENST00000442987]                       | pseudogene          | 1.78E-08 | 5.27E-04          | down                     | -1.86                   | Not used            |
| LINC01000          | capicua transcriptional repressor pseudogene 27 [Source:HGNC Symbol;Acc:HGNC:48835] [ENST00000442987]                       | pseudogene          | 1.30E-07 | 3.80E-03          | down                     | -1.98                   | Not used            |
| LINC01001          | Homo sapiens long intergenic non-protein coding RNA 1001 [LINC01001], long non-coding RNA [NR_028326]                       | rRNA                | 1.33E-09 | 3.97E-05          | down                     | -5.71                   | Not used            |
| LINC01019          | Homo sapiens long intergenic non-protein coding RNA 1019 [LINC01019], long non-coding RNA [NR_035898]                       | rRNA                | 5.42E-08 | 1.59E-03          | down                     | -3.38                   | Not used            |
| LINC01048          | Homo sapiens long intergenic non-protein coding RNA 1048 [LINC01048], long non-coding RNA [NR_125762]                       | rRNA                | 3.87E-07 | 1.12E-02          | down                     | -5.27                   | Not used            |
| LINC01122          | Homo sapiens long intergenic non-protein coding RNA 1122 [LINC01122], long non-coding RNA [NR_032873]                       | rRNA                | 9.63E-07 | 2.76E-02          | down                     | -2.57                   | Not used            |
| LINC01150          | Homo sapiens long intergenic non-protein coding RNA 1150 [LINC01150], long non-coding RNA [NR_120534]                       | rRNA                | 3.55E-09 | 1.06E-04          | down                     | -3.59                   | Not used            |
| LINC01192          | long intergenic non-protein coding RNA 1192 [Source:HGNC Symbol;Acc:HGNC:37197] [ENST00000488173]                           | long intergenic RNA | 4.90E-07 | 1.41E-02          | down                     | -2.39                   | Not used            |
| LINC01192          | long intergenic non-protein coding RNA 1192 [Source:HGNC Symbol;Acc:HGNC:37197] [ENST00000488173]                           | long intergenic RNA | 8.43E-09 | 2.50E-04          | down                     | -2.54                   | Not used            |
| LINC01225          | long intergenic non-protein coding RNA 1225 [Source:HGNC Symbol;Acc:HGNC:49677] [ENST00000563550]                           | long intergenic RNA | 1.94E-07 | 5.64E-03          | down                     | -2.72                   | Not used            |
| LINC01234          | Homo sapiens long intergenic non-protein coding RNA 1234 [LINC01234], transcript variant 1, long non-coding RNA [NR_110026] | rRNA                | 5.59E-09 | 1.66E-04          | down                     | -2.42                   | Not used            |
| LINC01270          | Homo sapiens long intergenic non-protein coding RNA 1270 [LINC01270], long non-coding RNA [NR_034124]                       | rRNA                | 3.82E-08 | 1.12E-03          | up                       | 18.01                   | Not used            |
| LINC01272          | Homo sapiens long intergenic non-protein coding RNA 1272 [LINC01272], mRNA [NM_001278655]                                   | long intergenic RNA | 4.72E-13 | 1.43E-08          | up                       | 22.11                   | Not used            |
| LINC01482          | Homo sapiens long intergenic non-protein coding RNA 1482 [LINC01482], long non-coding RNA [NR_110825]                       | rRNA                | 9.07E-07 | 2.60E-02          | down                     | -2.52                   | Not used            |
| LINC01503          | Homo sapiens long intergenic non-protein coding RNA 1503 [LINC01503], transcript variant 1, long non-coding RNA [NR_120685] | rRNA                | 1.34E-10 | 4.02E-06          | up                       | 5.26                    | Not used            |
| LINC01503          | Homo sapiens long intergenic non-protein coding RNA 1503 [LINC01503], transcript variant 1, long non-coding RNA [NR_120685] | rRNA                | 1.18E-09 | 3.52E-05          | up                       | 7.24                    | Not used            |
| LINC01503          | Homo sapiens long intergenic non-protein coding RNA 1503 [LINC01503], transcript variant 1, long non-coding RNA [NR_120685] | rRNA                | 5.47E-12 | 1.65E-07          | up                       | 10.11                   | Not used            |
| LINC01506          | Homo sapiens long intergenic non-protein coding RNA 1506 [LINC01506], long non-coding RNA [NR_109769]                       | rRNA                | 7.28E-09 | 2.16E-04          | up                       | 16.68                   | Not used            |
| LINC01512          | Homo sapiens long intergenic non-protein coding RNA 1512 [LINC01512], long non-coding RNA [NR_024478]                       | rRNA                | 1.19E-08 | 3.52E-04          | down                     | -4.61                   | Not used            |
| LINC01544          | Homo sapiens long intergenic non-protein coding RNA 1544 [LINC01544], long non-coding RNA [NR_103449]                       | rRNA                | 3.35E-07 | 9.69E-03          | down                     | -3.50                   | Not used            |
| LINC01550          | Homo sapiens long intergenic non-protein coding RNA 1550 [LINC01550], long non-coding RNA [NR_015430]                       | rRNA                | 3.64E-10 | 1.09E-05          | up                       | 15.25                   | Not used            |
| LINC01550          | long intergenic non-protein coding RNA 1550 [Source:HGNC Symbol;Acc:HGNC:20111] [ENST00000512901]                           | long intergenic RNA | 1.24E-07 | 3.63E-03          | up                       | 5.70                    | Not used            |
| LINC01550          | long intergenic non-protein coding RNA 1550 [Source:HGNC Symbol;Acc:HGNC:20111] [ENST00000512901]                           | long intergenic RNA | 2.05E-07 | 5.95E-03          | up                       | 7.51                    | Not used            |
| LINC01550          | long intergenic non-protein coding RNA 1550 [Source:HGNC Symbol;Acc:HGNC:20111] [ENST00000548222]                           | long intergenic RNA | 1.10E-08 | 3.25E-04          | up                       | 5.43                    | Not used            |
| LKAAEAR1           | Homo sapiens LKAAEAR motif containing 1 [LKAAEAR1], mRNA [NM_001007125]                                                     | gene                | 8.01E-10 | 2.40E-05          | down                     | -8.51                   | 856                 |
| LMF1               | Homo sapiens lipase maturation factor 1 (LMF1), transcript variant 1, mRNA [NM_022773]                                      | gene                | 9.90E-07 | 2.83E-02          | down                     | -2.06                   | 1015                |
| LMO2               | Homo sapiens LIM domain only 2 (rhombotin-like 1) (LMO2), transcript variant 1, mRNA [NM_005574]                            | gene                | 2.13E-09 | 6.35E-05          | up                       | 63.25                   | 535                 |
| LMTK3              | Homo sapiens lemur tyrosine kinase 3 (LMTK3), mRNA [NM_001080434]                                                           | gene                | 1.15E-06 | 4.68E-02          | up                       | 7.85                    | 530                 |
| lnc-AC007405.7.1-2 | LNCipedia lincRNA [lnc-AC007405.7.1-2], lincRNA [lnc-AC007405.7.1-2:1]                                                      | lincRNA             | 1.01E-10 | 3.04E-06          | down                     | -3.04                   | Not used            |
| lnc-AC068473.1-5   | LNCipedia lincRNA [lnc-AC068473.1-5], lincRNA [lnc-AC068473.1-5:3]                                                          | lincRNA             | 2.67E-07 | 7.75E-03          | down                     | -3.50                   | Not used            |
| lnc-AC099552.4.1-2 | LNCipedia lincRNA [lnc-AC099552.4.1-2], lincRNA [lnc-AC099552.4.1-2:3]                                                      | lincRNA             | 2.60E-08 | 7.68E-04          | down                     | -3.54                   | Not used            |
| lnc-ACR3C-2        | LNCipedia lincRNA [lnc-ACR3C-2], lincRNA [lnc-ACR3C-2:1]                                                                    | lincRNA             | 6.24E-07 | 1.79E-02          | down                     | -3.21                   | Not used            |
| lnc-AL69831.1-4    | LNCipedia lincRNA [lnc-AL69831.1-4], lincRNA [lnc-AL69831.1-4:1]                                                            | lincRNA             | 1.27E-06 | 3.61E-02          | down                     | -4.15                   | Not used            |
| lnc-ALP1-1         | LNCipedia lincRNA [lnc-ALP1-1], lincRNA [lnc-ALP1-1:1]                                                                      | lincRNA             | 2.80E-08 | 8.25E-04          | up                       | 9.11                    | Not used            |
| lnc-ANGPTL2-2      | LNCipedia lincRNA [lnc-ANGPTL2-2], lincRNA [lnc-ANGPTL2-2:3]                                                                | lincRNA             | 2.76E-09 | 8.22E-05          | down                     | -3.21                   | Not used            |
| lnc-AP000679.2.1-1 | LNCipedia lincRNA [lnc-AP000679.2.1-1], lincRNA [lnc-AP000679.2.1-1:3]                                                      | lincRNA             | 1.68E-06 | 4.78E-02          | down                     | -3.45                   | Not used            |
| lnc-APOL1-1        | LNCipedia lincRNA [lnc-APOL1-1], lincRNA [lnc-APOL1-1:1]                                                                    | lincRNA             | 1.71E-08 | 5.05E-04          | down                     | -3.10                   | Not used            |
| lnc-ARFGEF2-3      | LNCipedia lincRNA [lnc-ARFGEF2-3], lincRNA [lnc-ARFGEF2-3:8]                                                                | lincRNA             | 5.88E-07 | 1.69E-02          | down                     | -2.92                   | Not used            |
| lnc-ARRDC3-1       | LNCipedia lincRNA [lnc-ARRDC3-1], lincRNA [lnc-ARRDC3-1:10]                                                                 | lincRNA             | 2.22E-12 | 6.71E-08          | up                       | 28.97                   | Not used            |
| lnc-ARRDC3-1       | LNCipedia lincRNA [lnc-ARRDC3-1], lincRNA [lnc-ARRDC3-1:11]                                                                 | lincRNA             | 3.22E-07 | 9.33E-03          | up                       | 6.37                    | Not used            |
| lnc-ARRDC3-1       | LNCipedia lincRNA [lnc-ARRDC3-1], lincRNA [lnc-ARRDC3-1:13]                                                                 | lincRNA             | 5.87E-16 | 1.78E-11          | up                       | 29.55                   | Not used            |
| lnc-ARRDC3-1       | LNCipedia lincRNA [lnc-ARRDC3-1], lincRNA [lnc-ARRDC3-1:14]                                                                 | lincRNA             | 4.70E-17 | 1.43E-12          | up                       | 45.15                   | Not used            |
| lnc-ARRDC3-1       | LNCipedia lincRNA [lnc-ARRDC3-1], lincRNA [lnc-ARRDC3-1:1]                                                                  | lincRNA             | 1.55E-15 | 4.71E-11          | up                       | 173.80                  | Not used            |
| lnc-ARRDC3-1       | LNCipedia lincRNA [lnc-ARRDC3-1], lincRNA [lnc-ARRDC3-1:6]                                                                  | lincRNA             | 1.55E-16 | 4.72E-12          | up                       | 163.55                  | Not used            |
| lnc-ASB1-1         | LNCipedia lincRNA [lnc-ASB1-1], lincRNA [lnc-ASB1-1:2]                                                                      | lincRNA             | 3.06E-09 | 9.11E-05          | down                     | -4.48                   | Not used            |
| lnc-ATP6AP2-6      | LNCipedia lincRNA [lnc-ATP6AP2-6], lincRNA [lnc-ATP6AP2-6:1]                                                                | lincRNA             | 3.73E-09 | 1.11E-04          | down                     | -3.35                   | Not used            |
| lnc-ATP6V1D-1      | LNCipedia lincRNA [lnc-ATP6V1D-1], lincRNA [lnc-ATP6V1D-1:1]                                                                | lincRNA             | 5.81E-11 | 1.75E-06          | down                     | -3.88                   | Not used            |
| lnc-BAI3-3         | RST28357 Athersys RAGE Library Homo sapiens cDNA, mRNA sequence [BG208723]                                                  | miscellaneous       | 4.25E-09 | 1.26E-04          | down                     | -3.62                   | Not used            |
| lnc-BCL11B-1       | LNCipedia lincRNA [lnc-BCL11B-1], lincRNA [lnc-BCL11B-1:2]                                                                  | lincRNA             | 5.33E-10 | 1.60E-05          | up                       | 11.72                   | Not used            |
| lnc-BTD10-3        | ALU1_HUMAN [P39194] Alu subfamily S9 sequence contamination warning entry, partial (25%) [THC2496717]                       | miscellaneous       | 3.94E-09 | 1.17E-04          | down                     | -5.32                   | Not used            |
| lnc-C10orf11-1     | LNCipedia lincRNA [lnc-C10orf11-1], lincRNA [lnc-C10orf11-1:1]                                                              | lincRNA             | 1.06E-06 | 3.02E-02          | down                     | -3.77                   | Not used            |
| lnc-C15orf2-1      | LNCipedia lincRNA [lnc-C15orf2-1], lincRNA [lnc-C15orf2-1:1]                                                                | lincRNA             | 1.39E-06 | 3.96E-02          | down                     | -3.75                   | Not used            |
| lnc-C16orf42-2     | Homo sapiens cDNA FLJ45052 fis, clone BRAHWI0325242, [AK126997]                                                             | miscellaneous       | 1.16E-09 | 3.47E-05          | down                     | -35.70                  | Not used            |
| lnc-C16orf95-1     | LNCipedia lincRNA [lnc-C16orf95-1], lincRNA [lnc-C16orf95-1:7]                                                              | lincRNA             | 1.08E-06 | 3.08E-02          | down                     | -3.35                   | Not used            |
| lnc-C3orf38-2      | LNCipedia lincRNA [lnc-C3orf38-2], lincRNA [lnc-C3orf38-2:1]                                                                | lincRNA             | 1.74E-06 | 4.94E-02          | down                     | -3.80                   | Not used            |
| lnc-C5orf38-1      | LNCipedia lincRNA [lnc-C5orf38-1], lincRNA [lnc-C5orf38-1:3]                                                                | lincRNA             | 4.60E-08 | 1.35E-03          | down                     | -3.04                   | Not used            |
| lnc-C8orf34-1      | LNCipedia lincRNA [lnc-C8orf34-1], lincRNA [lnc-C8orf34-1:1]                                                                | lincRNA             | 4.73E-08 | 1.39E-03          | down                     | -2.30                   | Not used            |
| lnc-C9orf50-2      | LNCipedia lincRNA [lnc-C9orf50-2], lincRNA [lnc-C9orf50-2:1]                                                                | lincRNA             | 1.27E-07 | 3.71E-03          | down                     | -3.01                   | Not used            |
| lnc-C9orf79-1      | LNCipedia lincRNA [lnc-C9orf79-1], lincRNA [lnc-C9orf79-1:2]                                                                | lincRNA             | 3.31E-08 | 9.77E-04          | down                     | -2.16                   | Not used            |
| lnc-CCDC125-1      | Homo sapiens cDNA clone IMAGE:5298846, [BC039391]                                                                           | miscellaneous       | 1.61E-06 | 4.57E-02          | down                     | -3.82                   | Not used            |
| lnc-CCDC71L-1      | LNCipedia lincRNA [lnc-CCDC71L-1], lincRNA [lnc-CCDC71L-1:3]                                                                | lincRNA             | 1.88E-07 | 5.49E-03          | down                     | -3.01                   | Not used            |
| lnc-CCDC90A-5      | LNCipedia lincRNA [lnc-CCDC90A-5], lincRNA [lnc-CCDC90A-5:1]                                                                | lincRNA             | 2.55E-08 | 7.54E-04          | down                     | -2.63                   | Not used            |
| lnc-CCL23-1        | LNCipedia lincRNA [lnc-CCL23-1], lincRNA [lnc-CCL23-1:1]                                                                    | lincRNA             | 1.73E-06 | 4.91E-02          | down                     | -3.16                   | Not used            |
| lnc-CD207-1        | LNCipedia lincRNA [lnc-CD207-1], lincRNA [lnc-CD207-1:1]                                                                    | lincRNA             | 8.38E-07 | 2.40E-02          | down                     | -6.25                   | Not used            |
| lnc-CD300C-1       | ALU1_HUMAN [P39188] Alu subfamily J sequence contamination warning entry, partial (6%) [THC2613887]                         | miscellaneous       | 1.89E-07 | 5.51E-03          | up                       | 23.43                   | Not used            |
| lnc-CD25A-1        | LNCipedia lincRNA [lnc-CD25A-1], lincRNA [lnc-CD25A-1:1]                                                                    | lincRNA             | 4.60E-07 | 1.33E-02          | down                     | -2.02                   | Not used            |
| lnc-CDC42-1        | LNCipedia lincRNA [lnc-CDC42-1], lincRNA [lnc-CDC42-1:2]                                                                    | lincRNA             | 2.71E-07 | 7.87E-03          | down                     | -2.64                   | Not used            |
| lnc-CDH4-1         | LNCipedia lincRNA [lnc-CDH4-1], lincRNA [lnc-CDH4-1:1]                                                                      | lincRNA             | 1.03E-07 | 3.00E-03          | down                     | -4.83                   | Not used            |
| lnc-CHL1-1         | LNCipedia lincRNA [lnc-CHL1-1], lincRNA [lnc-CHL1-1:1]                                                                      | lincRNA             | 5.15E-08 | 1.51E-03          | down                     | -2.70                   | Not used            |
| lnc-CLCNB-3        | LNCipedia lincRNA [lnc-CLCNB-3], lincRNA [lnc-CLCNB-3:1]                                                                    | lincRNA             | 1.20E-06 | 3.42E-02          | down                     | -3.35                   | Not used            |
| lnc-CMTM4-1        | LNCipedia lincRNA [lnc-CMTM4-1], lincRNA [lnc-CMTM4-1:1]                                                                    | lincRNA             | 1.52E-06 | 4.31E-02          | down                     | -1.94                   | Not used            |
| lnc-COX4NB-1       | LNCipedia lincRNA [lnc-COX4NB-1], lincRNA [lnc-COX4NB-1:1]                                                                  | lincRNA             | 2.30E-07 | 6.70E-03          | down                     | -3.42                   | Not used            |
| lnc-CPEB4-1        | LNCipedia lincRNA [lnc-CPEB4-1], lincRNA [lnc-CPEB4-1:1]                                                                    | lincRNA             | 6.03E-13 | 1.83E-08          | up                       | 18.92                   | Not used            |
| lnc-CRISP2-1       | LNCipedia lincRNA [lnc-CRISP2-1], lincRNA [lnc-CRISP2-1:1]                                                                  | lincRNA             | 9.55E-07 | 1.71E-02          | down                     | -2.98                   | Not used            |
| lnc-CTS1L-1        | PREDICTED: Homo sapiens DAPK1 intronic transcript 1 (non-protein coding) [DAPK1-IT1], misc_RNA [XR_171053]                  | lincRNA             | 7.28E-12 | 2.20E-07          | up                       | 23.42                   | Not used            |
| lnc-CXKC5-1        | LNCipedia lincRNA [lnc-CXKC5-1], lincRNA [lnc-CXKC5-1:2]                                                                    | lincRNA             | 9.55E-08 | 2.80E-03          | down                     | -2.91                   | Not used            |
| lnc-CYS3-2         | LNCipedia lincRNA [lnc-CYS3-2], lincRNA [lnc-CYS3-2:2]                                                                      | lincRNA             | 3.73E-07 | 1.08E-02          | down                     | -2.92                   | Not used            |
| lnc-DCUN1D1-6      | LNCipedia lincRNA [lnc-DCUN1D1-6], lincRNA [lnc-DCUN1D1-6:3]                                                                | lincRNA             | 2.73E-07 | 7.91E-03          | down                     | -5.43                   | Not used            |
| lnc-DENND5A-1      | LNCipedia lincRNA [lnc-DENND5A-1], lincRNA [lnc-DENND5A-1:1]                                                                | lincRNA             | 1.54E-06 | 4.37E-02          | down                     | -2.20                   | Not used            |
| lnc-DNAI1-1        | GUUW72_HUMAN [GUUW72] GAA470, partial (64%) [THC2753675]                                                                    | lincRNA             | 6.58E-07 | 1.89E-02          | down                     | -2.05                   | Not used            |
| lnc-DTYMK-3        | LNCipedia lincRNA [lnc-DTYMK-3], lincRNA [lnc-DTYMK-3:1]                                                                    | lincRNA             | 2.12E-07 | 6.17E-03          | down                     | -2.59                   | Not used            |
| lnc-EBF3-6         | LNCipedia lincRNA [lnc-EBF3-6], lincRNA [lnc-EBF3-6:1]                                                                      | lincRNA             | 2.57E-11 | 7.73E-07          | up                       | 10.27                   | Not used            |
| lnc-EGFL6-2        | LNCipedia lincRNA [lnc-EGFL6-2], lincRNA [lnc-EGFL6-2:1]                                                                    | lincRNA             | 5.40E-07 | 1.56E-02          | down                     | -2.22                   | Not used            |
| lnc-EGLN1-1        | LNCipedia lincRNA [lnc-EGLN1-1], lincRNA [lnc-EGLN1-1:4]                                                                    | lincRNA             | 2.26E-07 | 6.57E-03          | up                       | 7.93                    | Not used            |
| lnc-EGLN1-1        | LNCipedia lincRNA [lnc-EGLN1-1], lincRNA [lnc-EGLN1-1:6]                                                                    | lincRNA             | 2.04E-08 | 6.02E-04          | up                       | 13.39                   | Not used            |
| lnc-EGLN1-1        | LNCipedia lincRNA [lnc-EGLN1-1], lincRNA [lnc-E                                                                             |                     |          |                   |                          |                         |                     |

| Gene Symbol           | Description                                                                                                     | Feature Type          | p-value  | Corrected p-value | Regulation in NOTCH1-mut (Mut vs WT) | Fold change | Position in Heatmap |
|-----------------------|-----------------------------------------------------------------------------------------------------------------|-----------------------|----------|-------------------|--------------------------------------|-------------|---------------------|
| lnc-LRRC32-5          | LINCpedia lincRNA (lnc-LRRC32-5), lincRNA (lnc-LRRC32-5-1)                                                      | lincRNA               | 4.05E-08 | 1.19E-03          | down                                 | -4.68       | Not used            |
| lnc-LYZL1-2           | LINCpedia lincRNA (lnc-LYZL1-2), lincRNA (lnc-LYZL1-2-1)                                                        | lincRNA               | 1.14E-07 | 3.34E-03          | down                                 | -2.92       | Not used            |
| lnc-MFSD11-2          | LINCpedia lincRNA (lnc-MFSD11-2), lincRNA (lnc-MFSD11-2-1)                                                      | lincRNA               | 9.43E-07 | 2.70E-02          | down                                 | -3.57       | Not used            |
| lnc-MGAT1-1           | Homo sapiens cDNA FLJ30091 fis, clone BNGH41000017. [AK054653]                                                  | miscellaneous         | 1.26E-06 | 3.59E-02          | up                                   | 4.31        | Not used            |
| lnc-MIB2-1            | LINCpedia lincRNA (lnc-MIB2-1), lincRNA (lnc-MIB2-1-5)                                                          | lincRNA               | 1.29E-06 | 3.67E-02          | down                                 | -2.58       | Not used            |
| lnc-MOGAT1-1          | LINCpedia lincRNA (lnc-MOGAT1-1), lincRNA (lnc-MOGAT1-1-1)                                                      | lincRNA               | 8.10E-07 | 2.32E-02          | down                                 | -3.23       | Not used            |
| lnc-NAV1-3            | DB229023 TRACH3 Homo sapiens cDNA clone TRACH3022015 5', mRNA sequence [DB229023]                               | miscellaneous         | 8.98E-07 | 2.57E-02          | down                                 | -3.54       | Not used            |
| lnc-NCF4-2            | Homo sapiens cDNA FLJ41638 fis, clone FEBRA2004813. [AK123632]                                                  | miscellaneous         | 5.17E-07 | 1.49E-02          | down                                 | -2.79       | Not used            |
| lnc-NDFIP2-12         | LINCpedia lincRNA (lnc-NDFIP2-12), lincRNA (lnc-NDFIP2-12-1)                                                    | lincRNA               | 6.82E-09 | 2.02E-04          | down                                 | -4.32       | Not used            |
| lnc-NLGN2-1           | LINCpedia lincRNA (lnc-NLGN2-1), lincRNA (lnc-NLGN2-1-2)                                                        | lincRNA               | 1.06E-06 | 3.04E-02          | down                                 | -4.01       | Not used            |
| lnc-NOL6-2            | LINCpedia lincRNA (lnc-NOL6-2), lincRNA (lnc-NOL6-2-1)                                                          | lincRNA               | 4.45E-08 | 1.31E-03          | down                                 | -4.07       | Not used            |
| lnc-NPAS2-1           | LINCpedia lincRNA (lnc-NPAS2-1), lincRNA (lnc-NPAS2-1-2)                                                        | lincRNA               | 7.96E-07 | 2.28E-02          | down                                 | -3.27       | Not used            |
| lnc-NPBWR2-1          | LINCpedia lincRNA (lnc-NPBWR2-1), lincRNA (lnc-NPBWR2-1-1)                                                      | lincRNA               | 5.15E-07 | 1.49E-02          | down                                 | -3.39       | Not used            |
| lnc-NR1D1-1           | LINCpedia lincRNA (lnc-NR1D1-1), lincRNA (lnc-NR1D1-1-1)                                                        | lincRNA               | 7.02E-07 | 2.02E-02          | up                                   | 3.20        | Not used            |
| lnc-PI3-1             | DA674107 NETRP2 Homo sapiens cDNA clone NETRP2004815 5', mRNA sequence [DA674107]                               | miscellaneous         | 6.36E-12 | 1.92E-07          | up                                   | 27.04       | Not used            |
| lnc-PLA2G4A-7         | LINCpedia lincRNA (lnc-PLA2G4A-7), lincRNA (lnc-PLA2G4A-7-1)                                                    | lincRNA               | 1.42E-06 | 4.05E-02          | down                                 | -1.92       | Not used            |
| lnc-POLR2B-2          | LINCpedia lincRNA (lnc-POLR2B-2), lincRNA (lnc-POLR2B-2-2)                                                      | lincRNA               | 1.13E-06 | 3.22E-02          | down                                 | -3.17       | Not used            |
| lnc-PPP1R26-2         | LINCpedia lincRNA (lnc-PPP1R26-2), lincRNA (lnc-PPP1R26-2-1)                                                    | lincRNA               | 1.66E-06 | 4.71E-02          | down                                 | -1.99       | Not used            |
| lnc-PPP1R3D-2         | LINCpedia lincRNA (lnc-PPP1R3D-2), lincRNA (lnc-PPP1R3D-2-2)                                                    | lincRNA               | 1.13E-06 | 3.22E-02          | down                                 | -2.95       | Not used            |
| lnc-PRC1-1            | Homo sapiens cDNA FLJ46625 fis, clone TLUNG020578. [AK128480]                                                   | miscellaneous         | 9.28E-06 | 2.75E-04          | down                                 | -4.54       | Not used            |
| lnc-PRPL1-1           | LINCpedia lincRNA (lnc-PRPL1-1), lincRNA (lnc-PRPL1-1-1)                                                        | lincRNA               | 8.93E-08 | 2.61E-03          | down                                 | -4.46       | Not used            |
| lnc-RAB28-4           | LINCpedia lincRNA (lnc-RAB28-4), lincRNA (lnc-RAB28-4-1)                                                        | lincRNA               | 1.35E-07 | 3.95E-03          | down                                 | -2.20       | Not used            |
| lnc-RAD23B-2          | LINCpedia lincRNA (lnc-RAD23B-2), lincRNA (lnc-RAD23B-2-1)                                                      | lincRNA               | 1.71E-06 | 4.85E-02          | down                                 | -2.87       | Not used            |
| lnc-RBM12B-2          | LINCpedia lincRNA (lnc-RBM12B-2), lincRNA (lnc-RBM12B-2-1)                                                      | lincRNA               | 3.56E-08 | 1.05E-03          | down                                 | -2.36       | Not used            |
| lnc-RP11-327F22.5.1-3 | LINCpedia lincRNA (lnc-RP11-327F22.5.1-3), lincRNA (lnc-RP11-327F22.5.1-3-3)                                    | lincRNA               | 1.40E-06 | 4.00E-02          | down                                 | -4.87       | Not used            |
| lnc-RP11-389E17.1.1-1 | Homo sapiens cDNA FLJ37626 fis, clone BRCCO2014748. [AK094945]                                                  | miscellaneous         | 1.33E-07 | 3.89E-03          | down                                 | -2.75       | Not used            |
| lnc-RP1-32110.10.1-1  | LINCpedia lincRNA (lnc-RP1-32110.10.1-1), lincRNA (lnc-RP1-32110.10.1-1-1)                                      | lincRNA               | 2.26E-09 | 6.76E-05          | down                                 | -3.27       | Not used            |
| lnc-RPL24-2           | LINCpedia lincRNA (lnc-RPL24-2), lincRNA (lnc-RPL24-2-4)                                                        | lincRNA               | 1.18E-06 | 3.36E-02          | down                                 | -1.93       | Not used            |
| lnc-S1PR2-1           | LINCpedia lincRNA (lnc-S1PR2-1), lincRNA (lnc-S1PR2-1-1)                                                        | lincRNA               | 2.70E-07 | 7.83E-03          | down                                 | -1.81       | Not used            |
| lnc-SEL1L-7           | LINCpedia lincRNA (lnc-SEL1L-7), lincRNA (lnc-SEL1L-7-2)                                                        | lincRNA               | 1.53E-07 | 4.46E-03          | down                                 | -2.87       | Not used            |
| lnc-SHCBP11-1         | Homo sapiens cDNA FLJ10580 fis, clone NTZR2003533. [AK001442]                                                   | miscellaneous         | 1.06E-06 | 3.02E-02          | down                                 | -1.98       | Not used            |
| lnc-SLC25A48-2        | LINCpedia lincRNA (lnc-SLC25A48-2), lincRNA (lnc-SLC25A48-2-1)                                                  | lincRNA               | 4.58E-07 | 1.32E-02          | down                                 | -3.87       | Not used            |
| lnc-SLC25A6-1         | ALU2_HUMAN (P39189) Alu subfamily SB sequence contamination warning entry, partial (11%) [THC2723724]           | miscellaneous         | 4.76E-07 | 1.37E-02          | down                                 | -2.06       | Not used            |
| lnc-SLC45A4-1         | LINCpedia lincRNA (lnc-SLC45A4-1), lincRNA (lnc-SLC45A4-1-1)                                                    | lincRNA               | 4.54E-08 | 1.34E-03          | down                                 | -2.12       | Not used            |
| lnc-SSTR4-2           | LINCpedia lincRNA (lnc-SSTR4-2), lincRNA (lnc-SSTR4-2-4)                                                        | lincRNA               | 3.63E-07 | 1.05E-02          | down                                 | -2.31       | Not used            |
| lnc-STK35-1           | LINCpedia lincRNA (lnc-STK35-1), lincRNA (lnc-STK35-1-1)                                                        | lincRNA               | 3.84E-10 | 1.15E-05          | down                                 | -4.86       | Not used            |
| lnc-SULF2-1           | LINCpedia lincRNA (lnc-SULF2-1), lincRNA (lnc-SULF2-1-1)                                                        | lincRNA               | 7.46E-07 | 2.14E-02          | down                                 | -2.85       | Not used            |
| lnc-TBC1D29-1         | Homo sapiens cDNA FLJ43993 fis, clone TESTM020102. [AK125981]                                                   | miscellaneous         | 2.11E-07 | 6.15E-03          | down                                 | -2.19       | Not used            |
| lnc-TERF1-2           | LINCpedia lincRNA (lnc-TERF1-2), lincRNA (lnc-TERF1-2-1)                                                        | lincRNA               | 5.34E-07 | 1.54E-02          | down                                 | -2.70       | Not used            |
| lnc-TEX261-2          | DA173998 BRAMY2 Homo sapiens cDNA clone BRAMY2037005 5', mRNA sequence [DA173998]                               | miscellaneous         | 3.03E-07 | 8.77E-03          | down                                 | -5.37       | Not used            |
| lnc-TIMP1-1           | LINCpedia lincRNA (lnc-TIMP1-1), lincRNA (lnc-TIMP1-1-1)                                                        | lincRNA               | 3.46E-08 | 1.02E-03          | down                                 | -4.87       | Not used            |
| lnc-TLR5-1            | LINCpedia lincRNA (lnc-TLR5-1), lincRNA (lnc-TLR5-1-2)                                                          | lincRNA               | 9.55E-08 | 2.80E-03          | down                                 | -3.75       | Not used            |
| lnc-TMD2-2            | LINCpedia lincRNA (lnc-TMD2-2), lincRNA (lnc-TMD2-2-1)                                                          | lincRNA               | 3.90E-08 | 1.15E-03          | down                                 | -2.47       | Not used            |
| lnc-TMD23-1           | LINCpedia lincRNA (lnc-TMD23-1), lincRNA (lnc-TMD23-1-1)                                                        | lincRNA               | 8.11E-07 | 2.32E-02          | down                                 | -2.74       | Not used            |
| lnc-TM4SF4-2          | Homo sapiens cDNA, FLJ99482. [AK309441]                                                                         | miscellaneous         | 1.37E-07 | 4.01E-03          | up                                   | 6.57        | Not used            |
| lnc-TMEM132C-6        | LINCpedia lincRNA (lnc-TMEM132C-6), lincRNA (lnc-TMEM132C-6-4)                                                  | lincRNA               | 8.43E-07 | 2.42E-02          | down                                 | -2.36       | Not used            |
| lnc-TMEM88B-4         | LINCpedia lincRNA (lnc-TMEM88B-4), lincRNA (lnc-TMEM88B-4-1)                                                    | lincRNA               | 5.06E-07 | 1.46E-02          | down                                 | -2.41       | Not used            |
| lnc-TMEM98-1          | LINCpedia lincRNA (lnc-TMEM98-1), lincRNA (lnc-TMEM98-1-2)                                                      | lincRNA               | 2.26E-07 | 6.56E-03          | down                                 | -3.94       | Not used            |
| lnc-TP53I11-1         | LINCpedia lincRNA (lnc-TP53I11-1), lincRNA (lnc-TP53I11-1-1)                                                    | lincRNA               | 6.16E-08 | 1.81E-03          | down                                 | -6.35       | Not used            |
| lnc-TP53NP1-1         | Homo sapiens hypothetical protein LOC286149, mRNA (cDNA clone IMAGE:40114544). [BC128221]                       | miscellaneous         | 8.02E-08 | 2.35E-03          | down                                 | -2.29       | Not used            |
| lnc-TPRA1-1           | LINCpedia lincRNA (lnc-TPRA1-1), lincRNA (lnc-TPRA1-1-2)                                                        | lincRNA               | 6.52E-10 | 1.95E-05          | down                                 | -3.11       | Not used            |
| lnc-TRAPP12-3         | LINCpedia lincRNA (lnc-TRAPP12-3), lincRNA (lnc-TRAPP12-3-1)                                                    | lincRNA               | 1.35E-08 | 3.99E-04          | down                                 | -4.98       | Not used            |
| lnc-TRMT61B-4         | LINCpedia lincRNA (lnc-TRMT61B-4), lincRNA (lnc-TRMT61B-4-1)                                                    | lincRNA               | 3.95E-07 | 1.14E-02          | down                                 | -3.28       | Not used            |
| lnc-TSC22D1-1         | LINCpedia lincRNA (lnc-TSC22D1-1), lincRNA (lnc-TSC22D1-1-4)                                                    | lincRNA               | 2.52E-10 | 7.56E-06          | down                                 | -24.89      | Not used            |
| lnc-TSPYL5-2          | LINCpedia lincRNA (lnc-TSPYL5-2), lincRNA (lnc-TSPYL5-2-1)                                                      | lincRNA               | 3.56E-08 | 1.05E-03          | down                                 | -6.52       | Not used            |
| lnc-TUBGCP3-6         | LINCpedia lincRNA (lnc-TUBGCP3-6), lincRNA (lnc-TUBGCP3-6-2)                                                    | lincRNA               | 5.62E-07 | 1.62E-02          | down                                 | -2.76       | Not used            |
| lnc-UTS2R-1           | LINCpedia lincRNA (lnc-UTS2R-1), lincRNA (lnc-UTS2R-1-1)                                                        | lincRNA               | 9.79E-08 | 2.86E-03          | down                                 | -4.34       | Not used            |
| lnc-UXS1-2            | LINCpedia lincRNA (lnc-UXS1-2), lincRNA (lnc-UXS1-2-1)                                                          | lincRNA               | 3.99E-07 | 1.15E-02          | down                                 | -3.90       | Not used            |
| lnc-VRK1-5            | LINCpedia lincRNA (lnc-VRK1-5), lincRNA (lnc-VRK1-5-8)                                                          | lincRNA               | 4.79E-12 | 1.45E-07          | up                                   | 17.14       | Not used            |
| lnc-WDR7-2            | AGENCOURT_14276563 NIH_MGC_180 Homo sapiens cDNA clone IMAGE:30386298 5', mRNA sequence [CD359767]              | miscellaneous         | 1.69E-09 | 5.04E-05          | down                                 | -2.86       | Not used            |
| lnc-WNT7A-1           | LINCpedia lincRNA (lnc-WNT7A-1), lincRNA (lnc-WNT7A-1-1)                                                        | lincRNA               | 1.01E-06 | 2.89E-02          | down                                 | -2.60       | Not used            |
| lnc-ZADH2-1           | LINCpedia lincRNA (lnc-ZADH2-1), lincRNA (lnc-ZADH2-1-3)                                                        | lincRNA               | 2.67E-09 | 7.96E-05          | down                                 | -2.55       | Not used            |
| lnc-ZEB2-1            | LINCpedia lincRNA (lnc-ZEB2-1), lincRNA (lnc-ZEB2-1-2)                                                          | lincRNA               | 2.01E-15 | 6.10E-11          | up                                   | 9.37        | Not used            |
| lnc-ZKSCAN1-1         | LINCpedia lincRNA (lnc-ZKSCAN1-1), lincRNA (lnc-ZKSCAN1-1-2)                                                    | lincRNA               | 1.55E-06 | 4.42E-02          | down                                 | -3.00       | Not used            |
| lnc-ZKSCAN1-1         | LINCpedia lincRNA (lnc-ZKSCAN1-1), lincRNA (lnc-ZKSCAN1-1-4)                                                    | lincRNA               | 3.62E-08 | 1.07E-03          | down                                 | -3.17       | Not used            |
| lnc-ZKSCAN1-1         | LINCpedia lincRNA (lnc-ZKSCAN1-1), lincRNA (lnc-ZKSCAN1-1-5)                                                    | lincRNA               | 4.91E-08 | 1.44E-03          | down                                 | -3.11       | Not used            |
| lnc-ZNF30-1           | LINCpedia lincRNA (lnc-ZNF30-1), lincRNA (lnc-ZNF30-1-1)                                                        | lincRNA               | 1.32E-06 | 3.75E-02          | down                                 | -5.23       | Not used            |
| lnc-ZNF438-3          | LINCpedia lincRNA (lnc-ZNF438-3), lincRNA (lnc-ZNF438-3-1)                                                      | lincRNA               | 1.75E-07 | 5.09E-03          | down                                 | -3.83       | Not used            |
| lnc-ZNF74-1           | LINCpedia lincRNA (lnc-ZNF74-1), lincRNA (lnc-ZNF74-1-6)                                                        | lincRNA               | 5.59E-08 | 1.76E-03          | down                                 | -2.09       | Not used            |
| lnc-ZNF793-1          | LINCpedia lincRNA (lnc-ZNF793-1), lincRNA (lnc-ZNF793-1-2)                                                      | lincRNA               | 1.01E-08 | 3.00E-04          | down                                 | -4.94       | Not used            |
| LOC100128002          | PREDICTED: Homo sapiens uncharacterized LOC100128002 (LOC100128002), misc_RNA [XR_159537]                       | uncharacterized locus | 1.41E-09 | 4.23E-05          | down                                 | -3.55       | Not used            |
| LOC100128276          | Homo sapiens cDNA FLJ43282 fis, clone LIVER007415. [AK125272]                                                   | miscellaneous         | 1.55E-10 | 4.65E-06          | up                                   | 43.87       | Not used            |
| LOC100128494          | Homo sapiens uncharacterized LOC100128494 (LOC100128494), long non-coding RNA [NR_104178]                       | rRNA                  | 2.95E-08 | 8.83E-04          | down                                 | -2.24       | Not used            |
| LOC100129215          | PREDICTED: Homo sapiens uncharacterized LOC100129215 (LOC100129215), misc_RNA [XR_103934]                       | uncharacterized locus | 7.15E-08 | 2.10E-03          | down                                 | -3.88       | Not used            |
| LOC100129322          | Homo sapiens cDNA FLJ45776 fis, clone NETRP2004090. [AK127678]                                                  | miscellaneous         | 4.99E-08 | 1.47E-03          | up                                   | 21.57       | Not used            |
| LOC100129473          | PREDICTED: Homo sapiens uncharacterized LOC100129473 (LOC100129473), misc_RNA [XR_247231]                       | uncharacterized locus | 4.89E-07 | 1.41E-02          | down                                 | -3.62       | Not used            |
| LOC100129721          | Homo sapiens cDNA FLJ4685 fis, clone BRACE3011447. [AK126643]                                                   | miscellaneous         | 2.77E-07 | 8.05E-03          | down                                 | -3.63       | Not used            |
| LOC100129846          | Homo sapiens cDNA FLJ42869 fis, clone BRHIP2022221. [AK124859]                                                  | miscellaneous         | 9.02E-08 | 2.64E-03          | down                                 | -4.00       | Not used            |
| LOC100130238          | Homo sapiens uncharacterized LOC100130238 (LOC100130238), long non-coding RNA [NR_024563]                       | rRNA                  | 2.58E-07 | 7.49E-03          | down                                 | -4.38       | Not used            |
| LOC100130417          | Homo sapiens uncharacterized LOC100130417 (LOC100130417), transcript variant 2, long non-coding RNA [NR_122045] | rRNA                  | 7.40E-08 | 2.17E-03          | down                                 | -4.14       | Not used            |
| LOC100130456          | Homo sapiens cDNA FLJ37693 fis, clone BRHIP2014954. [AK095012]                                                  | miscellaneous         | 5.07E-09 | 1.51E-04          | down                                 | -2.80       | Not used            |
| LOC100130520          | PREDICTED: Homo sapiens CD300c molecule-like (LOC100130520), transcript variant X3, mRNA [XM_005275830]         | miscellaneous         | 1.68E-06 | 4.77E-02          | up                                   | 5.29        | Not used            |
| LOC100130654          | Homo sapiens cDNA FLJ37924 fis, clone CTONG2000218. [AK095243]                                                  | miscellaneous         | 2.28E-07 | 6.62E-03          | down                                 | -2.97       | Not used            |
| LOC100130987          | Homo sapiens uncharacterized LOC100130987 (LOC100130987), long non-coding RNA [NR_024469]                       | rRNA                  | 6.86E-07 | 1.97E-02          | down                                 | -4.96       | Not used            |
| LOC100131131          | Homo sapiens clone DNA180542 AHPA9419 (UNQ9419) mRNA, complete cds. [AY358263]                                  | miscellaneous         | 2.78E-08 | 8.22E-04          | down                                 | -3.86       | Not used            |
| LOC100131400          | not provided                                                                                                    | unannotated probe     | 4.89E-07 | 1.41E-02          | down                                 | -3.11       | Not used            |
| LOC100131488          | Homo sapiens uncharacterized LOC100131488 (LOC100131488), long non-coding RNA [NR_004846]                       | rRNA                  | 2.93E-10 | 8.80E-06          | down                                 | -3.86       | Not used            |
| LOC100288162          | Homo sapiens uncharacterized LOC100288162 (LOC100288162), long non-coding RNA [NR_103772]                       | rRNA                  | 1.41E-06 | 4.00E-02          | down                                 | -2.58       | Not used            |
| LOC100294145          | Homo sapiens uncharacterized LOC100294145 (LOC100294145), transcript variant 2, long non-coding RNA [NR_037178] | rRNA                  | 5.88E-09 | 1.75E-04          | down                                 | -4.09       | Not used            |
| LOC100422737          | Homo sapiens uncharacterized LOC100422737 (LOC100422737), long non-coding RNA [NR_033557]                       | rRNA                  | 1.35E-06 | 3.84E-02          | down                                 | -3.77       | Not used            |
| LOC100422737          | QBGV8_MOUSE (QBGV8) Olfactory receptor MOR174-1, partial (5%) [THC2716877]                                      | gene                  | 3.82E-07 | 1.10E-02          | down                                 | -2.44       | Not used            |
| LOC100422737          | not provided                                                                                                    | unannotated probe     | 1.06E-06 | 3.02E-02          | down                                 | -3.46       | Not used            |
| LOC100505978          | Homo sapiens uncharacterized LOC100505978 (LOC100505978), long non-coding RNA [NR_038912]                       | rRNA                  | 7.75E-08 | 2.27E-03          | down                                 | -3.56       | Not used            |
| LOC100506127          | Homo sapiens cDNA FLJ30390 fis, clone BRACE2008308. [AK054952]                                                  | miscellaneous         | 1.34E-06 | 3.83E-02          | down                                 | -2.02       | Not used            |
| LOC100506257          | Homo sapiens cDNA FLJ61763 complete cds. [AK295076]                                                             | miscellaneous         | 8.21E-07 | 2.35E-02          | down                                 | -2.04       | Not used            |
| LOC100506368          | Homo sapiens uncharacterized LOC100506368 (LOC100506368), long non-coding RNA [NR_038905]                       | rRNA                  | 1.97E-07 | 5.73E-03          | down                                 | -2.24       | Not used            |
| LOC100507195          | Homo sapiens uncharacterized LOC100507195 (LOC100507195), long non-coding RNA [NR_120458]                       | rRNA                  | 5.22E-07 | 1.50E-02          | up                                   | 15.81       | Not used            |
| LOC100507334          | Homo sapiens two pore channel 3 pseudogene (LOC100507334), non-coding RNA [NR_037626]                           | pseudogene            | 1.17E-07 | 3.42E-03          | down                                 | -4.60       | Not used            |
| LOC100507420          | Homo sapiens uncharacterized LOC100507420 (LOC100507420), transcript variant 1, long non-coding RNA [NR_121620] | rRNA                  | 2.54E-08 | 7.51E-04          | down                                 | -2.14       | Not used            |
| LOC100507420          | PREDICTED: Homo sapiens uncharacterized LOC10050742                                                             |                       |          |                   |                                      |             |                     |

| Gene Symbol  | Description                                                                                                                                         | Feature Type          | p-value  | Corrected p-value | Regulation in NOTCH1-mut | Fold change (Mut vs WT) | Position in Heatmap |
|--------------|-----------------------------------------------------------------------------------------------------------------------------------------------------|-----------------------|----------|-------------------|--------------------------|-------------------------|---------------------|
| LOC101930017 | PREDICTED: Homo sapiens transcription initiation factor TFIIID subunit 4-like (LOC101930017), mRNA [XM_005276635]                                   | miscellaneous         | 1.59E-06 | 4.53E-02          | down                     | -3.39                   | Not used            |
| LOC101930634 | PREDICTED: Homo sapiens uncharacterized LOC101930634 (LOC101930634), ncRNA [XR_248595]                                                              | ncRNA                 | 3.95E-08 | 1.16E-03          | down                     | -4.73                   | Not used            |
| LOC102723701 | Homo sapiens uncharacterized LOC102723701 (LOC102723701), long non-coding RNA [NR_125821]                                                           | ncRNA                 | 1.19E-06 | 3.39E-02          | down                     | -3.28                   | Not used            |
| LOC102723894 | PREDICTED: Homo sapiens uncharacterized LOC102723894 (LOC102723894), ncRNA [XR_424244]                                                              | ncRNA                 | 3.60E-11 | 1.08E-06          | up                       | 17.28                   | Not used            |
| LOC102724545 | PREDICTED: Homo sapiens uncharacterized LOC102724545 (LOC102724545), transcript variant X1, ncRNA [XR_425228]                                       | ncRNA                 | 1.88E-07 | 5.47E-03          | up                       | 5.71                    | Not used            |
| LOC102725127 | PREDICTED: Homo sapiens uncharacterized LOC102725127 (LOC102725127), ncRNA [XR_433669]                                                              | ncRNA                 | 6.99E-09 | 2.08E-04          | down                     | -2.69                   | Not used            |
| LOC113230    | Homo sapiens uncharacterized protein LOC113230 (LOC113230), transcript variant 1, mRNA [NM_001291291]                                               | uncharacterized locus | 3.35E-08 | 9.88E-04          | down                     | -3.62                   | Not used            |
| LOC158435    | Homo sapiens uncharacterized LOC158435 (LOC158435), long non-coding RNA [NR_033838]                                                                 | ncRNA                 | 3.68E-07 | 1.07E-02          | down                     | -3.77                   | Not used            |
| LOC254896    | Homo sapiens uncharacterized LOC254896 (LOC254896), long non-coding RNA [NR_046173]                                                                 | ncRNA                 | 9.30E-10 | 2.78E-05          | up                       | 30.42                   | Not used            |
| LOC283352    | Homo sapiens uncharacterized LOC283352 (LOC283352), transcript variant 1, long non-coding RNA [NR_104172]                                           | ncRNA                 | 1.60E-07 | 4.68E-03          | up                       | 3.91                    | Not used            |
| LOC283731    | Homo sapiens uncharacterized LOC283731 (LOC283731), long non-coding RNA [NR_027073]                                                                 | ncRNA                 | 5.52E-07 | 1.59E-02          | down                     | -3.01                   | Not used            |
| LOC284379    | Homo sapiens solute carrier family 7 (cationic amino acid transporter, y+ system), member 3 pseudogene (LOC284379), non-coding RNA [NR_002938]      | pseudogene            | 8.22E-07 | 2.36E-02          | down                     | -3.75                   | Not used            |
| LOC284379    | not provided                                                                                                                                        | unannotated probe     | 7.44E-08 | 2.18E-03          | down                     | -2.81                   | Not used            |
| LOC285095    | PREDICTED: Homo sapiens uncharacterized LOC285095 (LOC285095), transcript variant X3, misc_RNA [XR_430644]                                          | uncharacterized locus | 4.09E-08 | 1.20E-03          | down                     | -3.04                   | Not used            |
| LOC285181    | Homo sapiens cDNA FLJ36538 fls, clone TRACH2005.159. [AK093857]                                                                                     | miscellaneous         | 4.57E-12 | 1.38E-07          | up                       | 18.08                   | Not used            |
| LOC338797    | Homo sapiens uncharacterized LOC338797 (LOC338797), long non-coding RNA [NR_103736]                                                                 | ncRNA                 | 7.78E-07 | 2.23E-02          | down                     | -3.72                   | Not used            |
| LOC339807    | Homo sapiens uncharacterized LOC339807 (LOC339807), long non-coding RNA [NR_034023]                                                                 | ncRNA                 | 2.73E-07 | 7.91E-03          | up                       | 7.21                    | Not used            |
| LOC388602    | Homo sapiens coiled-coil domain containing 101 pseudogene (LOC388602), non-coding RNA [NR_002556]                                                   | pseudogene            | 1.10E-07 | 3.21E-03          | up                       | 2.97                    | Not used            |
| LOC388602    | Homo sapiens uncharacterized LOC388602 (LOC388602), mRNA [NM_001291913]                                                                             | uncharacterized locus | 6.23E-07 | 1.79E-02          | down                     | -1.97                   | Not used            |
| LOC400558    | Homo sapiens uncharacterized LOC400558 (LOC400558), long non-coding RNA [NR_046200]                                                                 | ncRNA                 | 9.70E-10 | 2.90E-05          | down                     | -3.92                   | Not used            |
| LOC401480    | PREDICTED: Homo sapiens uncharacterized LOC401480 (LOC401480), misc_RNA [XR_142443]                                                                 | uncharacterized locus | 7.54E-08 | 2.21E-03          | down                     | -2.00                   | Not used            |
| LOC401557    | Homo sapiens uncharacterized LOC401557 (LOC401557), long non-coding RNA [NR_046107]                                                                 | ncRNA                 | 6.42E-08 | 1.82E-03          | down                     | -4.02                   | Not used            |
| LOC439951    | PREDICTED: Homo sapiens uncharacterized LOC439951 (LOC439951), misc_RNA [XR_171055]                                                                 | uncharacterized locus | 1.28E-12 | 4.48E-08          | down                     | -10.70                  | Not used            |
| LOC442132    | Homo sapiens golgin A6 family-like 1 pseudogene (LOC442132), non-coding RNA [NR_033966]                                                             | pseudogene            | 9.28E-07 | 2.66E-02          | down                     | -2.07                   | Not used            |
| LOC643549    | Homo sapiens hypothetical protein LOC643549, mRNA (cDNA clone IMAGE:40147028). [BC133006]                                                           | miscellaneous         | 5.50E-08 | 1.62E-03          | down                     | -2.52                   | Not used            |
| LOC646513    | PREDICTED: Homo sapiens VLG1945 (LOC646513), misc_RNA [XR_159371]                                                                                   | miscellaneous         | 1.24E-08 | 3.66E-04          | down                     | -5.42                   | Not used            |
| LOC646762    | zinc and ring finger 2 pseudogene 2 [Source:HGNC Symbol;Acc:HGNC:47293] [ENST00000442865]                                                           | pseudogene            | 6.13E-08 | 1.80E-03          | down                     | -2.39                   | Not used            |
| LOC648044    | PREDICTED: Homo sapiens guanine nucleotide binding protein (G protein), gamma 12-like (LOC648044), mRNA [XM_003959952]                              | miscellaneous         | 1.37E-06 | 3.90E-02          | down                     | -2.42                   | Not used            |
| LOC729040    | PREDICTED: Homo sapiens uncharacterized LOC729040 (LOC729040), misc_RNA [XR_241838]                                                                 | uncharacterized locus | 2.51E-08 | 7.42E-04          | up                       | 12.81                   | Not used            |
| LOC729083    | Homo sapiens uncharacterized LOC729083 (LOC729083), long non-coding RNA [NR_122070]                                                                 | ncRNA                 | 1.44E-06 | 4.09E-02          | up                       | 15.75                   | Not used            |
| LOC729159    | Homo sapiens UPF0607 protein ENSP00000381418-like (LOC729159), mRNA [NM_001282301]                                                                  | gene                  | 3.91E-07 | 1.13E-02          | down                     | -3.46                   | Not used            |
| LOC729159    | Homo sapiens UPF0607 protein ENSP00000381418-like (LOC729159), mRNA [NM_001282301]                                                                  | gene                  | 4.18E-08 | 1.23E-03          | down                     | -5.90                   | Not used            |
| LOC729296    | Homo sapiens uncharacterized LOC729296 (LOC729296), transcript variant 1, long non-coding RNA [NR_109916]                                           | ncRNA                 | 7.89E-08 | 2.31E-03          | up                       | 6.42                    | Not used            |
| LOC729609    | Homo sapiens uncharacterized LOC729609 (LOC729609), long non-coding RNA [NR_024440]                                                                 | ncRNA                 | 1.00E-07 | 2.93E-03          | down                     | -2.04                   | Not used            |
| LOC729737    | Homo sapiens uncharacterized LOC729737 (LOC729737), long non-coding RNA [NR_039983]                                                                 | ncRNA                 | 6.30E-08 | 1.85E-03          | up                       | 4.95                    | Not used            |
| LOC729860    | Homo sapiens cDNA FLJ11667 fls, clone FEBRA2028366. [AK123661]                                                                                      | miscellaneous         | 1.65E-08 | 4.89E-04          | up                       | 7.22                    | Not used            |
| LOC729879    | Homo sapiens cDNA FLJ35868 fls, clone TEST12007972. [AK093187]                                                                                      | miscellaneous         | 1.55E-06 | 4.41E-02          | down                     | -2.87                   | Not used            |
| LOC731424    | Homo sapiens uncharacterized LOC731424 (LOC731424), long non-coding RNA [NR_037867]                                                                 | ncRNA                 | 1.51E-08 | 4.47E-04          | up                       | 13.00                   | Not used            |
| LOC91450     | Homo sapiens uncharacterized LOC91450 (LOC91450), long non-coding RNA [NR_026959]                                                                   | ncRNA                 | 8.16E-09 | 2.42E-04          | up                       | 10.98                   | Not used            |
| LOXL3        | Homo sapiens lysyl oxidase-like 3 (LOXL3), transcript variant 1, mRNA [NM_032603]                                                                   | gene                  | 5.00E-08 | 1.47E-03          | up                       | 7.65                    | 327                 |
| LPAR6        | Homo sapiens lysophosphatidic acid receptor 6 (LPAR6), transcript variant 1, mRNA [NM_005767]                                                       | gene                  | 4.62E-14 | 1.40E-09          | up                       | 71.84                   | 189                 |
| LPCAT2       | Homo sapiens lysophosphatidylcholine acyltransferase 2 (LPCAT2), mRNA [NM_017839]                                                                   | gene                  | 1.71E-14 | 5.19E-09          | up                       | 30.14                   | Not used            |
| LPCAT2       | Homo sapiens lysophosphatidylcholine acyltransferase 2 (LPCAT2), mRNA [NM_017839]                                                                   | gene                  | 1.79E-11 | 5.40E-07          | up                       | 47.28                   | 283                 |
| LPPR2        | Homo sapiens lipid phosphate phosphatase-related protein type 2 (LPPR2), transcript variant 1, mRNA [NM_022737]                                     | gene                  | 3.69E-07 | 1.07E-02          | up                       | 2.60                    | 449                 |
| LRRN3        | leucine rich repeat and fibronectin type III domain containing 3 [Source:HGNC Symbol;Acc:HGNC:28370] [ENST00000588831]                              | gene                  | 7.33E-08 | 2.15E-03          | down                     | -2.74                   | 933                 |
| LRG1         | Homo sapiens leucine-rich alpha-2-glycoprotein 1 (LRG1), mRNA [NM_052972]                                                                           | gene                  | 6.29E-11 | 1.89E-06          | up                       | 37.13                   | 99                  |
| LRP1         | Homo sapiens low density lipoprotein receptor-related protein 1 (LRP1), mRNA [NM_002332]                                                            | gene                  | 4.83E-16 | 1.47E-11          | up                       | 11.16                   | 237                 |
| LRP3         | Homo sapiens low density lipoprotein receptor-related protein 3 (LRP3), mRNA [NM_002333]                                                            | gene                  | 5.70E-09 | 1.69E-04          | down                     | -5.88                   | 848                 |
| LRR25        | Homo sapiens leucine rich repeat containing 25 (LRR25), mRNA [NM_145256]                                                                            | gene                  | 4.75E-12 | 1.43E-07          | up                       | 47.83                   | 117                 |
| LRR27        | Homo sapiens leucine rich repeat containing 27 (LRR27), transcript variant 2, mRNA [NM_001143757]                                                   | gene                  | 6.15E-08 | 1.81E-03          | down                     | -3.31                   | 973                 |
| LRR4C        | Homo sapiens leucine rich repeat containing 4 (LRR4C), mRNA [NM_022143]                                                                             | gene                  | 1.21E-13 | 3.66E-09          | up                       | 40.04                   | 281                 |
| LRR75A       | Homo sapiens leucine rich repeat containing 75A (LRR75A), transcript variant 2, mRNA [NM_207387]                                                    | gene                  | 1.04E-07 | 3.04E-03          | up                       | 3.61                    | 466                 |
| LRR8C        | Homo sapiens leucine rich repeat containing 8 family, member C (LRR8C), mRNA [NM_032270]                                                            | gene                  | 9.36E-07 | 2.68E-02          | up                       | 3.61                    | 436                 |
| LRRN2        | Homo sapiens leucine rich repeat neuronal 2 (LRRN2), transcript variant 2, mRNA [NM_201630]                                                         | gene                  | 8.78E-09 | 2.34E-04          | down                     | -1.89                   | 956                 |
| LST1         | Homo sapiens leukocyte specific transcript 1 (LST1), transcript variant 1, mRNA [NM_007161]                                                         | gene                  | 1.52E-12 | 4.61E-08          | up                       | 53.46                   | 96                  |
| LTBR2        | Homo sapiens leukotriene B4 receptor 2 (LTBR2), transcript variant 1, mRNA [NM_019839]                                                              | gene                  | 3.09E-07 | 8.96E-03          | down                     | -2.20                   | 930                 |
| LTBP4        | Homo sapiens latent transforming growth factor beta binding protein 4 (LTBP4), transcript variant 1, mRNA [NM_001042544]                            | gene                  | 2.94E-08 | 8.69E-04          | down                     | -2.02                   | Not used            |
| LTBP4        | Homo sapiens latent transforming growth factor beta binding protein 4 (LTBP4), transcript variant 1, mRNA [NM_001042544]                            | gene                  | 8.36E-08 | 2.45E-03          | down                     | -2.03                   | 961                 |
| LTF          | Homo sapiens lactotransferrin (LTF), transcript variant 1, mRNA [NM_002343]                                                                         | gene                  | 2.09E-11 | 6.31E-07          | up                       | 233.14                  | 11                  |
| LUCAT1       | Homo sapiens lung cancer associated transcript 1 (non-protein coding) (LUCAT1), transcript variant 1, long non-coding RNA [NR_103548]               | gene                  | 3.12E-11 | 9.39E-07          | up                       | 45.73                   | 835                 |
| LUCAT1       | Homo sapiens lung cancer associated transcript 1 (non-protein coding) (LUCAT1), transcript variant 2, long non-coding RNA [NR_103549]               | ncRNA                 | 2.67E-11 | 8.05E-07          | up                       | 27.97                   | Not used            |
| LUCAT1       | lung cancer associated transcript 1 (non-protein coding) [Source:HGNC Symbol;Acc:HGNC:48498] [ENST00000513626]                                      | gene                  | 2.14E-13 | 6.49E-09          | up                       | 39.96                   | Not used            |
| LYAR         | Homo sapiens Ly1 antibody reactive (LYAR), transcript variant 1, mRNA [NM_017816]                                                                   | gene                  | 2.07E-08 | 6.12E-04          | up                       | 7.53                    | 337                 |
| LYNX1        | Homo sapiens lynx/neurotxin 1 (LYNX1), transcript variant SURLP2, mRNA [NM_177458]                                                                  | gene                  | 6.45E-09 | 1.92E-04          | down                     | -16.25                  | 878                 |
| MAF          | Homo sapiens v-maf avian musculoaponeurotic fibrosarcoma oncogene homolog B (MAF), transcript variant 2, mRNA [NM_001031804]                        | gene                  | 6.98E-14 | 2.10E-09          | up                       | 21.27                   | 370                 |
| MAFB         | Homo sapiens v-maf avian musculoaponeurotic fibrosarcoma oncogene homolog B (MAFB), mRNA [NM_005461]                                                | gene                  | 7.85E-14 | 2.38E-09          | up                       | 31.95                   | Not used            |
| MAFB         | Homo sapiens v-maf avian musculoaponeurotic fibrosarcoma oncogene homolog B (MAFB), mRNA [NM_005461]                                                | gene                  | 1.27E-13 | 3.85E-09          | up                       | 396.81                  | 34                  |
| MAGEL2       | Homo sapiens MAG-like 2 (MAGEL2), mRNA [NM_019066]                                                                                                  | gene                  | 5.64E-07 | 1.62E-02          | down                     | -7.67                   | 1171                |
| MAL          | Homo sapiens MAL - T-cell differentiation protein (MAL), transcript variant a, mRNA [NM_002371]                                                     | gene                  | 1.43E-11 | 4.32E-07          | up                       | 105.05                  | 140                 |
| MALRD1       | Homo sapiens MAM and LDL receptor class A domain containing 1 (MALRD1), mRNA [NM_001142308]                                                         | gene                  | 6.71E-07 | 1.93E-02          | down                     | -4.32                   | 1219                |
| MAML3        | Homo sapiens mastermind-like 3 (Drosophila) (MAML3), mRNA [NM_018171]                                                                               | gene                  | 3.67E-09 | 1.09E-04          | up                       | 11.14                   | 644                 |
| MANSC1       | Homo sapiens MANSC domain containing 1 (MANSC1), mRNA [NM_018050]                                                                                   | gene                  | 7.08E-07 | 2.03E-02          | up                       | 15.87                   | 772                 |
| MAP3K3       | Homo sapiens mitogen-activated protein kinase kinase kinase 3 (MAP3K3), transcript variant 1, mRNA [NM_203351]                                      | gene                  | 5.27E-07 | 1.52E-02          | up                       | 2.29                    | 421                 |
| MAP4         | Homo sapiens microtubule-associated protein 4 (MAP4), transcript variant 3, mRNA [NM_030885]                                                        | gene                  | 4.07E-08 | 1.20E-03          | down                     | -2.87                   | 1001                |
| MAR1         | Homo sapiens mitochondrial amidoxime reducing component 1 (MAR1), mRNA [NM_022746]                                                                  | gene                  | 3.28E-12 | 9.91E-08          | up                       | 41.42                   | 176                 |
| MARCO        | Homo sapiens macrophage receptor with collagenous structure (MARCO), mRNA [NM_006770]                                                               | gene                  | 3.26E-14 | 9.90E-10          | up                       | 46.59                   | 534                 |
| MATK         | Homo sapiens megakaryocyte-associated tyrosine kinase (MATK), transcript variant 1, mRNA [NM_139355]                                                | gene                  | 3.58E-08 | 1.06E-03          | up                       | 11.01                   | 582                 |
| MATN1-AS1    | Homo sapiens MATN1 antisense RNA 1 (MATN1-AS1), long non-coding RNA [NR_034182]                                                                     | ncRNA                 | 1.85E-07 | 5.39E-03          | down                     | -2.21                   | Not used            |
| MBOAT2       | Homo sapiens membrane bound O-acyltransferase domain containing 2 (MBOAT2), mRNA [NM_138799]                                                        | gene                  | 2.10E-16 | 6.38E-12          | up                       | 25.48                   | 280                 |
| MBOAT7       | Homo sapiens membrane bound O-acyltransferase domain containing 7 (MBOAT7), transcript variant 4, mRNA [NM_001146082]                               | gene                  | 3.74E-12 | 1.13E-07          | up                       | 24.27                   | 621                 |
| MBOAT7       | Homo sapiens membrane bound O-acyltransferase domain containing 7 (MBOAT7), transcript variant 1, mRNA [NM_0024298]                                 | gene                  | 8.98E-11 | 2.97E-06          | up                       | 8.25                    | Not used            |
| MCEMP1       | Homo sapiens mast cell-expressed membrane protein 1 (MCEMP1), mRNA [NM_174918]                                                                      | gene                  | 1.02E-17 | 3.11E-13          | up                       | 49.34                   | 86                  |
| MCTP1        | Homo sapiens multiple C2 domains, transmembrane 1 (MCTP1), transcript variant L, mRNA [NM_024717]                                                   | gene                  | 4.09E-08 | 1.20E-03          | up                       | 9.53                    | Not used            |
| MCTP1        | Homo sapiens multiple C2 domains, transmembrane 1 (MCTP1), transcript variant L, mRNA [NM_024717]                                                   | gene                  | 2.24E-17 | 6.81E-13          | up                       | 19.10                   | 252                 |
| MDH1B        | Homo sapiens malate dehydrogenase 1B, NAD (soluble) (MDH1B), transcript variant 3, non-coding RNA [NR_104261]                                       | gene                  | 6.20E-07 | 1.78E-02          | down                     | -2.45                   | 940                 |
| MEG3         | Homo sapiens maternally expressed 3 (non-protein coding) (MEG3), transcript variant 1, long non-coding RNA [NR_002766]                              | gene                  | 2.59E-08 | 7.65E-04          | down                     | -2.06                   | 958                 |
| MEGF11       | Homo sapiens multiple EGF-like domains 11 (MEGF11), mRNA [NM_032445]                                                                                | gene                  | 4.31E-08 | 1.27E-03          | down                     | -2.94                   | 915                 |
| MGAM         | PREDICTED: Homo sapiens maltase-glucoamylase (alpha-glucosidase) (MGAM), transcript variant X1, mRNA [XM_006716168]                                 | gene                  | 5.00E-14 | 1.52E-09          | up                       | 17.40                   | Not used            |
| MGAM         | Homo sapiens maltase-glucoamylase (alpha-glucosidase) (MGAM), mRNA [NM_004668]                                                                      | gene                  | 4.19E-14 | 1.27E-09          | up                       | 50.61                   | 178                 |
| MGAT4A       | Homo sapiens mannosyl (alpha-1,3)-glycoprotein beta-1,4-N-acetylglucosaminyltransferase, isozyme A (MGAT4A), transcript variant 1, mRNA [NM_012214] | gene                  | 3.80E-07 | 1.10E-02          | up                       | 31.66                   | 580                 |
| MGC45922     | Homo sapiens uncharacterized LOC424615 (MGC45922), long non-coding RNA [NR_038359]                                                                  | gene                  | 5.81E-10 | 1.74E-05          | down                     | -4.07                   | 982                 |
| MGST1        | Homo sapiens microsomal glutathione S-transferase 1 (MGST1), transcript variant 3, mRNA [NM_145791]                                                 | gene                  | 1.36E-14 | 4.13E-10          | up                       | 61.50                   | 151                 |
| MIAT         | Homo sapiens myocardial infarction associated transcript (non-protein coding) (MIAT), transcript variant 1, long non-coding RNA [NR_003491]         | ncRNA                 | 3.91E-09 | 1.16E-04          | up                       | 7.40                    | Not used            |
| MIAT         | Homo sapiens myocardial infarction associated transcript (non-protein coding) (MIAT), transcript variant 1, long non-coding RNA [NR_003491]         | ncRNA                 | 3.34E-10 | 1.00E-05          | up                       | 9.83                    | Not used            |
| MIAT         | Homo sapiens myocardial infarction associated transcript (non-protein coding) (MIAT), transcript variant 1, long non-coding RNA [NR_003491]         | ncRNA                 | 3.83E-08 | 1.13E-03          | up                       | 18.07                   | Not used            |
| MIAT         | Homo sapiens myocardial infarction associated transcript (non-protein coding) (MIAT), transcript variant 1, long non-coding RNA [NR_003491]         | ncRNA                 | 4.34E-08 | 1.28E-03          | up                       | 21.21                   | Not used            |
| MIAT         | Homo sapiens myocardial infarction associated transcript (non-protein coding) (MIAT), transcript variant 1, long non-coding RNA [NR_003491]         | ncRNA                 | 2.56E-08 | 7.56E-04          | up                       | 25.32                   | 585                 |
| MIAT         | Homo sapiens myocardial infarction associated transcript (non-protein coding) (MIAT), transcript variant 2, long non-coding RNA [NR_033319]         | ncRNA                 | 1.73E-06 | 4.90E-02          | up                       | 4.02                    | Not used            |
| MIATNB       | Homo sapiens cDNA: FLJ22849 fls, clone KIAA97. [AK026502]                                                                                           | gene                  | 2.35E-07 | 6.83E-03          | down                     | -1.88                   | 1138                |
| MICALL       | Homo sapiens MICAL C-terminal like (MICALL), mRNA [NM_032867]                                                                                       | gene                  | 3.83E-15 | 1.16E-10          | up                       | 22.84                   | 774                 |
| MINOS1-NBL1  | Homo sapiens MINOS1-NBL1 readthrough (MINOS1-NBL1), transcript variant 1, mRNA [NM_001204088]                                                       | gene                  | 6.51E-08 | 1.91E-03          | up                       | 6.35                    | 365                 |
| MIOX         | Homo sapiens myo-inositol oxygenase (MIOX), mRNA [NM_017584]                                                                                        | gene                  | 9.28E-09 | 2.75E-04          | down                     | -3                      |                     |



| Gene Symbol | Description                                                                                                                                           | Feature Type  | p-value  | Corrected p-value | Regulation in NOTCH1-mut | Fold change (Mut vs WT) | Position in Heatmap |
|-------------|-------------------------------------------------------------------------------------------------------------------------------------------------------|---------------|----------|-------------------|--------------------------|-------------------------|---------------------|
| MRV11       | Homo sapiens murine retrovirus integration site 1 homolog (MRV11), transcript variant 2, mRNA [NM_130385]                                             | gene          | 3.02E-08 | 8.92E-04          | up                       | 42.44                   | 628                 |
| MS4A14      | Homo sapiens membrane-spanning 4-domains, subfamily A, member 14 (MS4A14), transcript variant 1, mRNA [NM_032597]                                     | gene          | 1.32E-08 | 3.92E-04          | up                       | 10.45                   | 755                 |
| MS4A3       | Homo sapiens membrane-spanning 4-domains, subfamily A, member 3 (hematopoietic cell-specific) (MS4A3), transcript variant 1, mRNA [NM_006138]         | gene          | 7.68E-11 | 2.21E-06          | up                       | 14.48                   | 244                 |
| MS4A4A      | Homo sapiens membrane-spanning 4-domains, subfamily A, member 4A (MS4A4A), transcript variant 2, mRNA [NM_024021]                                     | gene          | 7.23E-07 | 2.08E-02          | up                       | 17.52                   | 266                 |
| MS4A6A      | Homo sapiens membrane-spanning 4-domains, subfamily A, member 6A (MS4A6A), transcript variant 1, mRNA [NM_152852]                                     | gene          | 4.19E-07 | 1.21E-02          | up                       | 33.42                   | Not used            |
| MS4A6A      | Homo sapiens membrane-spanning 4-domains, subfamily A, member 6A (MS4A6A), transcript variant 2, mRNA [NM_023249]                                     | gene          | 6.97E-07 | 2.00E-02          | up                       | 58.90                   | 518                 |
| MS4A7       | Homo sapiens membrane-spanning 4-domains, subfamily A, member 7 (MS4A7), transcript variant 1, mRNA [NM_021201]                                       | gene          | 1.56E-07 | 4.55E-03          | up                       | 7.66                    | 233                 |
| MSL1        | Homo sapiens male-specific lethal 1 homolog (Drosophila) (MSL1), mRNA [NM_001012241]                                                                  | gene          | 1.13E-06 | 3.21E-02          | up                       | 2.69                    | 425                 |
| MSMP        | Homo sapiens microseminoprotein, prostate associated (MSMP), mRNA [NM_001044264]                                                                      | gene          | 6.70E-07 | 1.93E-02          | down                     | -2.36                   | 1051                |
| MSRB1       | Homo sapiens methionine sulfoxide reductase B1 (MSRB1), mRNA [NM_016332]                                                                              | gene          | 1.45E-08 | 4.29E-04          | up                       | 16.63                   | 630                 |
| MSX2P1      | Homo sapiens msh homeobox 2 pseudogene 1 (MSX2P1), non-coding RNA [NR_002307]                                                                         | gene          | 1.17E-09 | 3.49E-05          | up                       | 12.68                   | 732                 |
| MT1B        | Homo sapiens metallothionein 1B (MT1B), mRNA [NM_005947]                                                                                              | gene          | 4.01E-08 | 1.18E-03          | up                       | 4.24                    | 487                 |
| MT1E        | Homo sapiens metallothionein 1E (MT1E), mRNA [NM_175617]                                                                                              | gene          | 9.07E-07 | 2.60E-02          | up                       | 4.72                    | Not used            |
| MT1E        | Homo sapiens metallothionein 1E (MT1E), mRNA [NM_175617]                                                                                              | gene          | 4.69E-09 | 1.39E-04          | up                       | 7.11                    | 488                 |
| MT1HL1      | Homo sapiens metallothionein 1H-like 1 (MT1HL1), mRNA [NM_001276687]                                                                                  | gene          | 7.84E-07 | 2.25E-02          | up                       | 2.92                    | 412                 |
| MT2A        | Homo sapiens metallothionein 2A (MT2A), mRNA [NM_005953]                                                                                              | gene          | 1.81E-08 | 5.35E-04          | up                       | 19.22                   | 547                 |
| MTCP1       | Homo sapiens mature T-cell proliferation 1 (MTCP1), mRNA [NM_001018025]                                                                               | gene          | 3.67E-07 | 1.06E-02          | down                     | -3.87                   | 1130                |
| MTMR11      | Homo sapiens myotubularin related protein 11 (MTMR11), transcript variant 2, mRNA [NM_181873]                                                         | gene          | 4.33E-07 | 1.25E-02          | up                       | 13.63                   | 318                 |
| MUC1        | Homo sapiens mucin 1, cell surface associated (MUC1), transcript variant 7, mRNA [NM_001044392]                                                       | gene          | 4.72E-07 | 1.36E-02          | down                     | -3.26                   | 1155                |
| MUC2        | Homo sapiens mucin 2, oligomeric mucus/gel-forming (MUC2), mRNA [NM_002457]                                                                           | gene          | 2.84E-07 | 8.24E-03          | down                     | -2.32                   | 809                 |
| MUC3A       | Homo sapiens mucin 3A, cell surface associated (MUC3A), mRNA [NM_005960]                                                                              | gene          | 1.19E-07 | 3.47E-03          | down                     | -2.03                   | Not used            |
| MUC3A       | Homo sapiens mucin 3A, cell surface associated (MUC3A), mRNA [NM_005960]                                                                              | gene          | 1.18E-07 | 4.40E-03          | down                     | -6.92                   | 1182                |
| MUC8        | PREDICTED: Homo sapiens mucin 8 (MUC8), mRNA [XM_005275730]                                                                                           | gene          | 6.96E-08 | 2.04E-03          | down                     | -4.71                   | 1248                |
| MXD1        | Homo sapiens MAX dimerization protein 1 (MXD1), transcript variant 1, mRNA [NM_002357]                                                                | gene          | 3.38E-08 | 9.98E-04          | up                       | 6.79                    | Not used            |
| MXD1        | Homo sapiens MAX dimerization protein 1 (MXD1), transcript variant 1, mRNA [NM_002357]                                                                | gene          | 4.68E-11 | 1.41E-06          | up                       | 12.59                   | 618                 |
| MYBPC3      | Homo sapiens myosin binding protein C, cardiac (MYBPC3), mRNA [NM_000256]                                                                             | gene          | 2.16E-07 | 6.29E-03          | up                       | 2.91                    | 482                 |
| MYBPH       | Homo sapiens myosin binding protein H (MYBPH), mRNA [NM_004997]                                                                                       | gene          | 8.10E-08 | 2.37E-03          | up                       | 12.24                   | 647                 |
| MYCL        | Homo sapiens v-myc avian myelocytomatosis viral oncogene lung carcinoma derived homolog (MYCL), transcript variant 1, mRNA [NM_001033081]             | gene          | 2.18E-12 | 6.59E-08          | up                       | 48.63                   | 297                 |
| MYH14       | Homo sapiens myosin, heavy chain 14, non-muscle (MYH14), transcript variant 1, mRNA [NM_001077186]                                                    | gene          | 2.80E-07 | 8.11E-03          | down                     | -3.23                   | 891                 |
| MYO1F       | Homo sapiens myosin IF (MYO1F), mRNA [NM_012335]                                                                                                      | gene          | 1.17E-09 | 3.48E-05          | up                       | 20.27                   | 636                 |
| MYOF        | Homo sapiens myoferlin (MYOF), transcript variant 1, mRNA [NM_013451]                                                                                 | gene          | 9.92E-11 | 2.98E-06          | up                       | 40.96                   | 298                 |
| NACC2       | Homo sapiens NACC family member 2, BEN and BTB (POZ) domain containing (NACC2), mRNA [NM_144653]                                                      | gene          | 1.82E-10 | 5.47E-06          | up                       | 61.69                   | 105                 |
| NAMPT       | Homo sapiens cDNA FLJ13279 fis, clone OVARC100105, moderately similar to PRE-B CELL ENHANCING FACTOR PRECURSOR. [AK023341]                            | miscellaneous | 3.29E-07 | 9.54E-03          | up                       | 9.33                    | Not used            |
| NAMPT       | Homo sapiens nicotinamide phosphoribosyltransferase (NAMPT), mRNA [NM_005746]                                                                         | gene          | 7.92E-08 | 2.32E-03          | up                       | 10.16                   | Not used            |
| NAMPT       | Homo sapiens nicotinamide phosphoribosyltransferase (NAMPT), mRNA [NM_005746]                                                                         | gene          | 3.16E-09 | 9.40E-05          | up                       | 20.05                   | 704                 |
| NANOS2      | Homo sapiens nanos homolog 2 (Drosophila) (NANOS2), mRNA [NM_001029861]                                                                               | gene          | 1.02E-07 | 2.98E-03          | down                     | -3.12                   | 1157                |
| NBAT1       | Homo sapiens neuroblastoma associated transcript 1 (NBAT1), long non-coding RNA [NR_034143]                                                           | gene          | 1.32E-07 | 3.86E-03          | down                     | -3.22                   | 1152                |
| NCAM1       | Homo sapiens neural cell adhesion molecule 1 (NCAM1), transcript variant 5, mRNA [NM_001242607]                                                       | gene          | 2.03E-07 | 5.90E-03          | up                       | 11.07                   | 721                 |
| NCF2        | Homo sapiens neutrophil cytosolic factor 2 (NCF2), transcript variant 1, mRNA [NM_000433]                                                             | gene          | 1.38E-07 | 4.02E-03          | up                       | 18.16                   | 607                 |
| NCOA4       | Homo sapiens nuclear receptor coactivator 4 (NCOA4), transcript variant 1, mRNA [NM_001145260]                                                        | gene          | 2.35E-10 | 7.07E-06          | up                       | 5.01                    | 468                 |
| NCR1        | Homo sapiens natural cytotoxicity triggering receptor 1 (NCR1), transcript variant 1, mRNA [NM_004829]                                                | gene          | 1.53E-10 | 4.58E-06          | up                       | 5.21                    | 225                 |
| NCR2        | Homo sapiens natural cytotoxicity triggering receptor 2 (NCR2), transcript variant 1, mRNA [NM_004829]                                                | gene          | 1.44E-06 | 4.11E-02          | down                     | -2.57                   | 887                 |
| NDUFAG-AS1  | Homo sapiens NDUFAG antisense RNA 1 (head to head) (NDUFAG-AS1), long non-coding RNA [NR_034118]                                                      | ncRNA         | 4.47E-07 | 1.29E-02          | down                     | -1.85                   | Not used            |
| NEFL        | Homo sapiens neurofilament, light polypeptide (NEFL), mRNA [NM_006158]                                                                                | gene          | 1.61E-09 | 4.82E-05          | up                       | 9.52                    | 746                 |
| NELL2       | Homo sapiens NEL-like 2 (chicken) (NELL2), transcript variant 2, mRNA [NM_006159]                                                                     | gene          | 1.73E-12 | 5.24E-08          | up                       | 54.30                   | 577                 |
| NES         | Homo sapiens nestin (NES), mRNA [NM_006617]                                                                                                           | gene          | 5.05E-07 | 1.46E-02          | down                     | -2.51                   | 1271                |
| NFAM1       | Homo sapiens NFAT activating protein with ITAM motif 1 (NFAM1), mRNA [NM_145912]                                                                      | gene          | 3.23E-17 | 1.14E-12          | up                       | 608.59                  | 17                  |
| NFE2        | Homo sapiens nuclear factor, erythroid 2 (NFE2), transcript variant 1, mRNA [NM_006163]                                                               | gene          | 1.02E-11 | 3.63E-07          | up                       | 193.93                  | 138                 |
| NFIL3       | Homo sapiens nuclear factor, interleukin 3 regulated (NFIL3), transcript variant 3, mRNA [NM_005384]                                                  | gene          | 3.88E-13 | 1.18E-08          | up                       | 29.90                   | 116                 |
| NFKB1L1     | Homo sapiens nuclear factor of kappa light polypeptide gene enhancer in B-cells inhibitor-like 1 (NFKB1L1), transcript variant 2, mRNA [NM_001144961] | gene          | 1.08E-10 | 3.26E-06          | down                     | -4.42                   | 868                 |
| NFYC-AS1    | Homo sapiens NFYC antisense RNA 1 (NFYC-AS1), long non-coding RNA [NR_024567]                                                                         | ncRNA         | 2.01E-09 | 6.01E-05          | down                     | -4.09                   | Not used            |
| NHSL2       | NHS-like 2 [Source:HGNC Symbol;Acc:HGNC:33737] [ENST0000037677]                                                                                       | gene          | 1.30E-06 | 3.70E-02          | up                       | 5.37                    | 469                 |
| NID1        | Homo sapiens nidogen 1 (NID1), mRNA [NM_002508]                                                                                                       | gene          | 1.05E-09 | 3.15E-05          | up                       | 22.90                   | 299                 |
| NID2        | Homo sapiens mRNA; cDNA DKFZp686D12108 (from clone DKFZp686D12108). [BX648241]                                                                        | gene          | 1.07E-06 | 3.06E-02          | down                     | -2.76                   | 1058                |
| NIN1        | Homo sapiens ninjurin 1 (NIN1), mRNA [NM_004148]                                                                                                      | gene          | 1.25E-06 | 3.57E-02          | up                       | 13.15                   | 123                 |
| NIN2        | Homo sapiens ninjurin 2 (NIN2), transcript variant 1, mRNA [NM_016533]                                                                                | gene          | 2.78E-08 | 8.20E-04          | up                       | 31.22                   | 745                 |
| NKG7        | Homo sapiens natural killer cell granule protein 7 (NKG7), mRNA [NM_005601]                                                                           | gene          | 7.06E-08 | 2.07E-03          | up                       | 51.56                   | 132                 |
| NKX1-2      | Homo sapiens NK1 homeobox 2 (NKX1-2), mRNA [NM_001146340]                                                                                             | gene          | 7.29E-09 | 2.17E-04          | down                     | -3.40                   | 1004                |
| NKX2-5      | Homo sapiens NK2 homeobox 5 (NKX2-5), transcript variant 2, mRNA [NM_001166175]                                                                       | gene          | 5.52E-08 | 1.62E-03          | down                     | -2.97                   | 1002                |
| NLR3        | Homo sapiens mRNA for FLJ00398 protein. [AK090476]                                                                                                    | gene          | 1.01E-11 | 3.04E-07          | down                     | -4.84                   | 1164                |
| NLR4        | Homo sapiens NLR family, CARD domain containing 4 (NLR4), transcript variant 1, mRNA [NM_021209]                                                      | gene          | 2.47E-07 | 7.18E-03          | up                       | 25.20                   | 631                 |
| NLRP12      | Homo sapiens NLR family, pyrin domain containing 12 (NLRP12), transcript variant 3, mRNA [NM_001277126]                                               | gene          | 9.08E-12 | 2.74E-07          | up                       | 83.20                   | 175                 |
| NLRP3       | Homo sapiens NLR family, pyrin domain containing 3 (NLRP3), transcript variant 3, mRNA [NM_001079821]                                                 | gene          | 8.79E-09 | 2.61E-04          | up                       | 50.48                   | 124                 |
| NLRP3       | Homo sapiens NLR family, pyrin domain containing 3 (NLRP3), transcript variant 6, mRNA [NM_001243133]                                                 | gene          | 2.69E-10 | 8.08E-06          | up                       | 39.41                   | Not used            |
| NME8        | Homo sapiens NME/NUM2 family member 8 (NME8), mRNA [NM_016616]                                                                                        | gene          | 7.99E-10 | 2.39E-05          | up                       | 40.64                   | 134                 |
| NMUR1       | Homo sapiens neurotensin U receptor 1 (NMUR1), mRNA [NM_006056]                                                                                       | gene          | 1.55E-10 | 4.69E-06          | up                       | 19.21                   | 737                 |
| NBOX        | Homo sapiens NBOX cognesis homeobox (NBOX), mRNA [NM_001080413]                                                                                       | gene          | 1.41E-06 | 4.01E-02          | down                     | -2.00                   | 1079                |
| NOL3        | Homo sapiens nucleolar protein 3 (apoptosis repressor with CARD domain) (NOL3), transcript variant 2, mRNA [NM_003946]                                | gene          | 1.54E-06 | 4.37E-02          | up                       | 2.50                    | 484                 |
| NOV         | Homo sapiens nephroblastoma overexpressed (NOV), mRNA [NM_002514]                                                                                     | gene          | 2.35E-11 | 7.08E-07          | up                       | 37.16                   | 286                 |
| NPB         | Homo sapiens neuropeptide B (NPB), mRNA [NM_148896]                                                                                                   | gene          | 1.13E-06 | 3.80E-02          | down                     | -3.12                   | 1235                |
| NPCL11      | Homo sapiens NPC1-like 1 (NPCL11), transcript variant 1, mRNA [NM_013389]                                                                             | gene          | 3.61E-07 | 1.05E-02          | down                     | -3.09                   | 936                 |
| NPC2        | Homo sapiens Niemann-Pick disease, type C2 (NPC2), mRNA [NM_006432]                                                                                   | gene          | 5.18E-10 | 1.55E-05          | up                       | 2.94                    | 431                 |
| NPDC1       | Homo sapiens neural proliferation, differentiation and control, 1 (NPDC1), mRNA [NM_015392]                                                           | gene          | 6.21E-09 | 1.84E-04          | up                       | 7.77                    | 335                 |
| NPL         | Homo sapiens N-acetylneuraminate pyruvate lyase (dihydrodipicolinate synthase) (NPL), transcript variant 2, mRNA [NM_001200050]                       | gene          | 1.41E-11 | 4.25E-07          | up                       | 7.04                    | Not used            |
| NPL         | Homo sapiens N-acetylneuraminate pyruvate lyase (dihydrodipicolinate synthase) (NPL), transcript variant 2, mRNA [NM_001200050]                       | gene          | 6.22E-11 | 1.87E-06          | up                       | 32.37                   | 632                 |
| NPL         | Homo sapiens N-acetylneuraminate pyruvate lyase (dihydrodipicolinate synthase) (NPL), transcript variant 3, mRNA [NM_001200050]                       | gene          | 2.35E-09 | 7.01E-05          | up                       | 18.56                   | Not used            |
| NPL         | N-acetylneuraminate pyruvate lyase (dihydrodipicolinate synthase) [Source:HGNC Symbol;Acc:HGNC:16781] [ENST00000463899]                               | gene          | 3.84E-07 | 1.11E-02          | down                     | -2.03                   | Not used            |
| NPY6R       | Homo sapiens neuropeptide Y receptor Y6 (pseudogene) (NPY6R), non-coding RNA [NR_002713]                                                              | gene          | 1.78E-07 | 5.19E-03          | down                     | -3.07                   | 1153                |
| NR6A1       | Homo sapiens nuclear receptor subfamily 6, group A, member 1 (NR6A1), transcript variant 1, mRNA [NM_033334]                                          | gene          | 1.04E-10 | 3.13E-06          | up                       | 30.21                   | Not used            |
| NR6A1       | Homo sapiens nuclear receptor subfamily 6, group A, member 1 (NR6A1), transcript variant 1, mRNA [NM_033334]                                          | gene          | 1.62E-12 | 4.89E-08          | up                       | 45.30                   | 147                 |
| NRG1        | Homo sapiens neuregulin 1 (NRG1), transcript variant HRG-gamma, mRNA [NM_004495]                                                                      | gene          | 1.25E-07 | 3.66E-03          | up                       | 7.49                    | 361                 |
| NRIP2       | Homo sapiens nuclear receptor interacting protein 2 (NRIP2), mRNA [NM_031474]                                                                         | gene          | 2.21E-07 | 6.43E-03          | down                     | -2.26                   | 1158                |
| NSG1        | Homo sapiens neuron specific gene family member 1 (NSG1), transcript variant 3, mRNA [NM_001287763]                                                   | gene          | 6.84E-11 | 2.06E-06          | up                       | 22.19                   | 777                 |
| NTNG2       | Homo sapiens netrin G2 (NTNG2), mRNA [NM_023536]                                                                                                      | gene          | 6.19E-08 | 1.82E-03          | up                       | 12.37                   | 780                 |
| NUCB2       | Homo sapiens nucleobindin 2 (NUCB2), mRNA [NM_005013]                                                                                                 | gene          | 1.06E-08 | 3.15E-04          | up                       | 11.02                   | 681                 |
| NUDT8       | Homo sapiens nudix (nucleoside diphosphate linked moiety X)-type motif 8 (NUDT8), transcript variant 2, mRNA [NM_181843]                              | gene          | 5.22E-07 | 1.50E-02          | down                     | -2.22                   | 923                 |
| NUMA1       | Homo sapiens nuclear mitotic apparatus protein 1 (NUMA1), transcript variant 1, mRNA [NM_006185]                                                      | gene          | 3.08E-07 | 8.94E-03          | down                     | -2.23                   | 1086                |
| NUP188      | Homo sapiens nucleoporin 188kDa (NUP188), mRNA [NM_015354]                                                                                            | gene          | 4.28E-07 | 1.24E-02          | down                     | -2.47                   | 1016                |
| OASL        | Homo sapiens 2'-5'-oligoadenylate synthetase-like (OASL), transcript variant 1, mRNA [NM_003733]                                                      | gene          | 5.08E-09 | 1.51E-04          | up                       | 19.48                   | 598                 |
| OGFR        | Homo sapiens opioid growth factor receptor (OGFR), mRNA [NM_007346]                                                                                   | gene          | 4.40E-08 | 1.32E-03          | down                     | -2.58                   | 1106                |
| OLF1M1      | Homo sapiens olfactomedin 1 (OLF1M1), transcript variant 2, mRNA [NM_006334]                                                                          | gene          | 7.32E-11 | 2.20E-06          | up                       | 6.63                    | 810                 |
| OLF4M4      | Homo sapiens olfactomedin 4 (OLF4M4), mRNA [NM_006418]                                                                                                | gene          | 9.96E-12 | 3.00E-07          | up                       | 77.02                   | 840                 |
| OLIG1       | Homo sapiens oligodendrocyte transcription factor 1 (OLIG1), mRNA [NM_138983]                                                                         | gene          | 1.31E-18 | 3.99E-14          | up                       | 149.58                  | 72                  |
| OPLAH       | Homo sapiens 5-oxoprolinase (ATP-hydrolysing) (OPLAH), mRNA [NM_017570]                                                                               | gene          | 6.23E-08 | 1.83E-03          | up                       | 4.14                    | 349                 |
| OPRD1       | Homo sapiens opioid receptor, delta 1 (OPRD1), mRNA [NM_000911]                                                                                       | gene          | 2.72E-07 | 7.89E-03          | down                     | -2.88                   | 1061                |
| OR10C1      | Homo sapiens olfactory receptor, family 10, subfamily C, member 1 (gene/pseudogene) (OR10C1), mRNA [NM_013941]                                        | gene          | 7.51E-07 | 2.15E-02          | down                     | -4.38                   | 1189                |
| OR10G9      | Homo sapiens olfactory receptor, family 10, subfamily G, member 9 (OR10G9), mRNA [NM_001001953]                                                       | gene          | 4.29E-07 | 1.24E-02          | down                     | -4.19                   | 1203                |
| OR1J4       | Homo sapiens olfactory receptor, family 1, subfamily J, member 4 (OR1J4), mRNA [NM_001004452]                                                         | gene          | 2.39E-07 | 6.96E-03          | down                     | -2.91                   | 1028                |
| OR1L6       | Homo sapiens olfactory receptor, family 1, subfamily L, member 6 (OR1L6), mRNA [NM_001004453]                                                         | gene          | 1.72E-11 | 5.19E-07          | down                     | -3.06                   | 945                 |
| OR2A2       | Homo sapiens olfactory receptor, family 2, subfamily A, member 2 (OR2A2), mRNA [NM_001005480]                                                         | gene          | 3.65E-08 | 1.08E-03          | down                     | -4.64                   | 988                 |
| OR3A4P      | Homo sapiens olfactory receptor, family 3, subfamily A, member 4 pseudogene (OR3A4P), non-coding RNA [NR_024128]                                      | gene          | 1.67E-07 | 4.88E-03          | down                     | -2.40                   | 1204                |
| OR4D6       | Homo sapiens olfactory receptor, family 4, subfamily D, member 6 (OR4D6), mRNA [NM_001004708]                                                         | gene          | 1.19E-06 | 3.39E-02          | down                     | -3.32                   | 1233                |
| OR4Q3       | Homo sapiens olfactory receptor, family 4, subfamily Q, member 3 (OR4Q3), mRNA [NM_172194]                                                            | gene          | 5.33E-07 | 1.54E-02          | down                     | -3.12                   | 1048                |
| ORS1B5      | Homo sapiens olfactory receptor, family 51, subfamily B, member 5 (ORS1B5), transcript variant 1, mRNA [NM_001005567]                                 | gene          | 3.64E-07 | 1.05E-02          | down                     | -3.24                   | 1251                |
| ORS1I2      | Homo sapiens olfactory receptor, family 51, subfamily I, member 2 (ORS1I2), mRNA [NM_001004754]                                                       | gene          | 4.41E-07 | 1.19E-02          | down                     | -5.39                   | 1213                |
| ORS5C1      | Homo sapiens olfactory receptor, family 5, subfamily C, member 1 (ORS5C1), mRNA [NM_001001923]                                                        |               |          |                   |                          |                         |                     |



| Gene Symbol | Description                                                                                                                                        | Feature Type  | p-value  | Corrected p-value | Regulation in NOTCH1-mut | Fold change (Mut vs WT) | Position in Heatmap |
|-------------|----------------------------------------------------------------------------------------------------------------------------------------------------|---------------|----------|-------------------|--------------------------|-------------------------|---------------------|
| PCAT19      | Homo sapiens prostate cancer associated transcript 19 (non-protein coding) (PCAT19), long non-coding RNA [NR_040109]                               | ncRNA         | 1.11E-07 | 3.25E-03          | down                     | -3.61                   | Not used            |
| PCAT19      | Homo sapiens prostate cancer associated transcript 19 (non-protein coding) (PCAT19), long non-coding RNA [NR_040109]                               | gene          | 4.97E-08 | 1.46E-03          | down                     | -3.71                   | 1207                |
| PCDH8       | Homo sapiens protocadherin beta 8 (PCDH8), mRNA [NM_019120]                                                                                        | gene          | 2.29E-07 | 6.65E-03          | down                     | -3.55                   | 1243                |
| PCED1B-AS1  | Homo sapiens PCED1B antisense RNA 1 (PCED1B-AS1), long non-coding RNA [NR_026544]                                                                  | ncRNA         | 3.84E-08 | 1.13E-03          | down                     | -3.32                   | Not used            |
| PCNXL4      | Homo sapiens cDNA FLJ38170 fs, clone FCBF1000024, [AKO95489]                                                                                       | gene          | 6.37E-09 | 1.89E-04          | down                     | -2.56                   | 1147                |
| PCSK1N      | Homo sapiens proprotein convertase subtilisin/kexin type 1 inhibitor (PCSK1N), mRNA [NM_013271]                                                    | gene          | 1.05E-11 | 3.18E-07          | down                     | -15.01                  | 874                 |
| PCSK5       | Homo sapiens proprotein convertase subtilisin/kexin type 5 (PCSK5), transcript variant 2, mRNA [NM_006200]                                         | gene          | 1.75E-13 | 5.31E-09          | up                       | 40.30                   | 554                 |
| PCTP        | Homo sapiens phosphatidylcholine transfer protein (PCTP), transcript variant 1, mRNA [NM_021213]                                                   | gene          | 5.50E-08 | 1.62E-03          | up                       | 11.01                   | 660                 |
| PDE3B       | Homo sapiens phosphodiesterase 3B, cGMP-inhibited (PDE3B), mRNA [NM_000922]                                                                        | gene          | 6.92E-08 | 2.03E-03          | up                       | 40.35                   | 531                 |
| PDE4D       | Homo sapiens phosphodiesterase 4D, cAMP-specific (PDE4D), transcript variant 3, mRNA [NM_001165899]                                                | gene          | 5.69E-08 | 1.67E-03          | up                       | 8.63                    | Not used            |
| PDE4D       | Homo sapiens phosphodiesterase 4D, cAMP-specific (PDE4D), transcript variant 3, mRNA [NM_001165899]                                                | gene          | 1.97E-11 | 5.92E-07          | up                       | 28.04                   | 538                 |
| PDE9A       | Homo sapiens cDNA FLJ90181 fs, clone MAMMA1000706, [AK074662]                                                                                      | gene          | 6.90E-09 | 2.05E-04          | down                     | -2.88                   | 1265                |
| PDGFC       | Homo sapiens platelet derived growth factor C (PDGFC), transcript variant 1, mRNA [NM_016205]                                                      | gene          | 9.13E-11 | 2.74E-06          | up                       | 18.31                   | 733                 |
| PF4V1       | Homo sapiens platelet factor 4 variant 1 (PF4V1), mRNA [NM_002620]                                                                                 | gene          | 4.36E-07 | 1.26E-02          | up                       | 12.43                   | 243                 |
| PFKFB3      | Homo sapiens 6-phosphofructo-2-kinase/fructose-2,6-bisphosphatase 3 (PFKFB3), transcript variant 1, mRNA [NM_004566]                               | gene          | 3.04E-10 | 9.10E-06          | up                       | 8.16                    | 317                 |
| PFKFB4      | Homo sapiens 6-phosphofructo-2-kinase/fructose-2,6-bisphosphatase 4 (PFKFB4), mRNA [NM_004567]                                                     | gene          | 2.82E-12 | 8.52E-08          | up                       | 17.46                   | 620                 |
| PGC         | Homo sapiens progesterone receptor (PGR), transcript variant 1, mRNA [NM_002630]                                                                   | gene          | 1.32E-06 | 3.76E-02          | down                     | -2.73                   | 1140                |
| PGD         | Homo sapiens phosphogluconate dehydrogenase (PGD), mRNA [NM_002631]                                                                                | gene          | 3.25E-08 | 9.58E-04          | up                       | 7.03                    | 668                 |
| PGLYRP1     | Homo sapiens peptidoglycan recognition protein 1 (PGLYRP1), mRNA [NM_005091]                                                                       | gene          | 6.68E-16 | 2.64E-11          | up                       | 164.23                  | 62                  |
| PGPEP1L     | Homo sapiens peptidoglycanase-like (PGPEP1L), transcript variant 2, mRNA [NM_001167902]                                                            | gene          | 7.46E-08 | 2.19E-03          | down                     | -4.24                   | 1156                |
| PHC2        | Homo sapiens polyhomeotic homolog 2 (Drosophila) (PHC2), transcript variant 1, mRNA [NM_198040]                                                    | gene          | 4.59E-09 | 1.37E-04          | up                       | 3.39                    | 478                 |
| PHOSPHO1    | Homo sapiens phosphatase, orphan 1 (PHOSPHO1), transcript variant 1, mRNA [NM_001143804]                                                           | gene          | 9.16E-09 | 2.72E-04          | up                       | 4.75                    | 499                 |
| P13         | Homo sapiens peptidase inhibitor 3, skin-derived (P13), mRNA [NM_002638]                                                                           | gene          | 8.32E-09 | 2.47E-04          | up                       | 67.54                   | 148                 |
| PI4KA       | Homo sapiens phosphatidylinositol 4-kinase, catalytic, alpha (PI4KA), mRNA [NM_058004]                                                             | gene          | 2.32E-07 | 6.75E-03          | down                     | -2.03                   | 1105                |
| PICALM      | Homo sapiens phosphatidylinositol binding clathrin assembly protein (PICALM), transcript variant 1, mRNA [NM_007166]                               | gene          | 2.58E-08 | 7.60E-04          | up                       | 4.30                    | 446                 |
| PID1        | Homo sapiens phosphotyrosine interaction domain containing 1 (PID1), transcript variant 1, mRNA [NM_017933]                                        | gene          | 2.58E-09 | 7.69E-05          | up                       | 18.92                   | 236                 |
| PIK3R1      | Homo sapiens phosphoinositide-3-kinase, regulatory subunit 1 (alpha) (PIK3R1), transcript variant 1, mRNA [NM_181523]                              | gene          | 6.86E-07 | 1.97E-02          | up                       | 3.32                    | 392                 |
| PITX1       | Homo sapiens paired-like homeodomain 1 (PITX1), mRNA [NM_002653]                                                                                   | gene          | 2.94E-07 | 8.51E-03          | down                     | -3.14                   | 1201                |
| PKP4        | Homo sapiens plakophilin 4 (PKP4), transcript variant 1, mRNA [NM_003628]                                                                          | gene          | 3.96E-07 | 1.14E-02          | up                       | 6.90                    | 229                 |
| PLA2G4C     | phospholipase A2, group IVC (cytosolic, calcium-independent) [Source:HGNC Symbol;Acc:HGNC:9037] [ENST00000596510]                                  | gene          | 5.50E-09 | 1.64E-04          | down                     | -2.84                   | 916                 |
| PLA2G7      | Homo sapiens phospholipase A2, group VII (platelet-activating factor acetylhydrolase, plasma) (PLA2G7), transcript variant 1, mRNA [NM_005044]     | gene          | 8.94E-13 | 2.71E-08          | up                       | 35.34                   | 300                 |
| PLAUR       | Homo sapiens plasminogen activator, urokinase receptor (PLAUR), transcript variant 3, mRNA [NM_001005377]                                          | gene          | 1.78E-13 | 5.40E-09          | up                       | 79.40                   | 39                  |
| PLB1        | Homo sapiens phospholipase B1 (PLB1), transcript variant 1, mRNA [NM_153021]                                                                       | gene          | 7.55E-09 | 2.24E-04          | up                       | 8.50                    | 762                 |
| PLCB1       | Homo sapiens phospholipase C, beta 1 (phosphoinositide-specific) (PLCB1), transcript variant 1, mRNA [NM_015192]                                   | gene          | 1.04E-06 | 2.96E-02          | up                       | 3.78                    | Not used            |
| PLCB1       | Homo sapiens phospholipase C, beta 1 (phosphoinositide-specific) (PLCB1), transcript variant 2, mRNA [NM_182734]                                   | gene          | 1.49E-08 | 4.39E-04          | up                       | 6.26                    | 502                 |
| PLCH2       | Homo sapiens phospholipase C, eta 2 (PLCH2), transcript variant 1, mRNA [NM_014638]                                                                | gene          | 3.99E-07 | 1.15E-02          | down                     | -2.97                   | 1144                |
| PLEK        | Homo sapiens pleckstrin (PLEK), mRNA [NM_002664]                                                                                                   | gene          | 1.41E-07 | 4.11E-03          | up                       | 9.25                    | 314                 |
| PLEKHG3     | Homo sapiens pleckstrin homology domain containing, family G (with RhoGef domain) member 3 (PLEKHG3), mRNA [NM_015549]                             | gene          | 1.50E-16 | 4.48E-12          | up                       | 118.38                  | Not used            |
| PLEKHG3     | Homo sapiens pleckstrin homology domain containing, family G (with RhoGef domain) member 3 (PLEKHG3), mRNA [NM_015549]                             | gene          | 4.85E-13 | 1.47E-08          | up                       | 213.67                  | 68                  |
| PLEKHG5     | Homo sapiens pleckstrin homology domain containing, family G (with RhoGef domain) member 5 (PLEKHG5), transcript variant 8, mRNA [NM_001265594]    | gene          | 3.06E-08 | 9.03E-04          | down                     | -2.72                   | 927                 |
| PLEKH2      | Homo sapiens pleckstrin homology domain containing, family O member 2 (PLEKH2), transcript variant 1, mRNA [NM_025201]                             | gene          | 8.65E-08 | 2.53E-03          | up                       | 5.17                    | 344                 |
| PLSCR1      | Homo sapiens phospholipid scramblase 1 (PLSCR1), mRNA [NM_021105]                                                                                  | gene          | 7.47E-09 | 2.20E-04          | up                       | 17.02                   | 685                 |
| PLXDC1      | Homo sapiens plexin domain containing 1 (PLXDC1), mRNA [NM_020405]                                                                                 | gene          | 8.66E-09 | 2.57E-04          | up                       | 11.02                   | 372                 |
| PLXDC2      | Homo sapiens plexin domain containing 2 (PLXDC2), transcript variant 1, mRNA [NM_032812]                                                           | gene          | 2.47E-13 | 7.48E-09          | up                       | 79.28                   | 571                 |
| PLXNC1      | Homo sapiens plexin C1 (PLXNC1), transcript variant 1, mRNA [NM_005761]                                                                            | gene          | 3.17E-09 | 9.44E-05          | up                       | 30.16                   | 102                 |
| PMP22       | Homo sapiens peripheral myelin protein 22 (PMP22), transcript variant 1, mRNA [NM_000304]                                                          | gene          | 8.60E-13 | 2.60E-08          | up                       | 10.31                   | 806                 |
| PNPLA2      | Homo sapiens patatin-like phospholipase domain containing 2 (PNPLA2), mRNA [NM_002376]                                                             | gene          | 1.05E-07 | 3.06E-03          | down                     | -2.91                   | 1023                |
| PNLR1C      | polymerase (RNA) I polypeptide C, 30kDa [Source:HGNC Symbol;Acc:HGNC:20194] [ENST00000512472]                                                      | gene          | 1.81E-07 | 5.27E-03          | down                     | -2.38                   | 911                 |
| POLR2F      | Homo sapiens polymerase (RNA) II (DNA directed) polypeptide F (POLR2F), transcript variant 2, mRNA [NM_00131129]                                   | gene          | 3.48E-07 | 1.01E-02          | down                     | -1.65                   | 1112                |
| PPA2        | pyrophosphatase [inorganic] 2 [Source:HGNC Symbol;Acc:HGNC:28883] [ENST00000505713]                                                                | gene          | 1.96E-08 | 5.80E-04          | down                     | -5.82                   | 865                 |
| PPDF        | pancreatic progenitor cell differentiation and proliferation factor [Source:HGNC Symbol;Acc:HGNC:16142] [ENST00000370177]                          | gene          | 5.05E-09 | 1.50E-04          | down                     | -5.32                   | 985                 |
| PP1A4G      | peptidylprolyl isomerase A (cyclophilin A)-like 4G [Source:HGNC Symbol;Acc:HGNC:33996] [ENST00000419275]                                           | gene          | 1.14E-07 | 3.32E-03          | down                     | -3.36                   | 1150                |
| PPM1F       | Homo sapiens protein phosphatase, Mg <sup>2+</sup> /Mn <sup>2+</sup> dependent, 1F (PPM1F), mRNA [NM_014634]                                       | gene          | 2.28E-08 | 6.73E-04          | up                       | 9.24                    | 653                 |
| PPP1R12B    | Homo sapiens protein phosphatase 1, regulatory subunit 12B (PPP1R12B), transcript variant 1, mRNA [NM_002481]                                      | gene          | 5.43E-07 | 1.56E-02          | up                       | 2.58                    | 479                 |
| PPP1R13B    | Homo sapiens protein phosphatase 1, regulatory subunit 13B (PPP1R13B), mRNA [NM_015316]                                                            | gene          | 1.22E-06 | 3.49E-02          | down                     | -3.19                   | 1129                |
| PPP1R18     | Homo sapiens protein phosphatase 1, regulatory subunit 18 (PPP1R18), transcript variant 1, mRNA [NM_133471]                                        | gene          | 7.03E-07 | 2.02E-02          | up                       | 5.11                    | Not used            |
| PPP1R18     | Homo sapiens protein phosphatase 1, regulatory subunit 18 (PPP1R18), transcript variant 1, mRNA [NM_133471]                                        | gene          | 3.97E-12 | 1.20E-07          | up                       | 5.98                    | 398                 |
| PPP1R3B     | Homo sapiens protein phosphatase 1, regulatory subunit 3B (PPP1R3B), transcript variant 1, mRNA [NM_001201329]                                     | gene          | 5.82E-09 | 1.73E-04          | up                       | 5.99                    | 403                 |
| PPP2R2B     | Homo sapiens protein phosphatase 2, regulatory subunit B, beta (PPP2R2B), transcript variant 10, mRNA [NM_0012171948]                              | gene          | 3.27E-10 | 9.82E-06          | up                       | 9.06                    | 719                 |
| PPP2R5B     | protein phosphatase 2, regulatory subunit B', beta [Source:HGNC Symbol;Acc:HGNC:9310] [ENST00000412922]                                            | gene          | 3.68E-07 | 1.06E-02          | down                     | -2.72                   | 1198                |
| PRAM1       | Homo sapiens PML-RARA regulated adaptor molecule 1 (PRAM1), mRNA [NM_032152]                                                                       | gene          | 2.77E-08 | 7.88E-04          | up                       | 13.25                   | 684                 |
| PRDM1       | Homo sapiens PR domain containing 1, with ZNF domain (PRDM1), transcript variant 1, mRNA [NM_001198]                                               | gene          | 2.60E-07 | 1.55E-03          | up                       | 27.51                   | 599                 |
| PRDM6       | Homo sapiens PR domain containing 6 (PRDM6), mRNA [NM_001136239]                                                                                   | gene          | 9.44E-08 | 2.76E-03          | down                     | -4.09                   | 1033                |
| PRF1        | Homo sapiens perforin 1 (pore forming protein) (PRF1), transcript variant 1, mRNA [NM_005041]                                                      | gene          | 2.38E-10 | 7.14E-06          | up                       | 20.78                   | 523                 |
| PRKACA      | Homo sapiens protein kinase, cAMP-dependent, catalytic, alpha (PRKACA), transcript variant 1, mRNA [NM_002730]                                     | gene          | 7.57E-07 | 2.17E-02          | up                       | 2.57                    | 426                 |
| PRKCH1      | Homo sapiens protein kinase C, eta (PRKCH), mRNA [NM_006255]                                                                                       | gene          | 4.26E-11 | 1.28E-06          | up                       | 62.71                   | 591                 |
| PRKCO       | Homo sapiens protein kinase C, theta (PRKCO), transcript variant 1, mRNA [NM_006257]                                                               | gene          | 3.30E-14 | 1.00E-09          | up                       | 26.03                   | 194                 |
| PRKCO-AS1   | Homo sapiens PRKCO antisense RNA 1 (PRKCO-AS1), transcript variant 1, long non-coding RNA [NR_036502]                                              | ncRNA         | 3.91E-12 | 1.18E-07          | up                       | 81.47                   | Not used            |
| PRKCO-AS1   | PRKCO antisense RNA 1 [Source:HGNC Symbol;Acc:HGNC:44689] [ENST00000501822]                                                                        | RNA antisense | 3.64E-07 | 1.05E-02          | up                       | 6.21                    | Not used            |
| PRKCO-AS1   | PRKCO antisense RNA 1 [Source:HGNC Symbol;Acc:HGNC:44689] [ENST00000501822]                                                                        | RNA antisense | 5.44E-07 | 1.57E-02          | up                       | 7.40                    | Not used            |
| PRLHR       | Homo sapiens prolactin releasing hormone receptor (PRLHR), mRNA [NM_004248]                                                                        | gene          | 2.22E-07 | 6.45E-03          | down                     | -2.06                   | 967                 |
| PRM1        | Homo sapiens protamine 1 (PRM1), mRNA [NM_002761]                                                                                                  | gene          | 3.95E-10 | 1.18E-05          | down                     | -2.22                   | 996                 |
| PROK2       | Homo sapiens prokineticin 2 (PROK2), transcript variant 2, mRNA [NM_021935]                                                                        | gene          | 2.56E-15 | 7.79E-11          | up                       | 742.48                  | 22                  |
| PRR25       | Homo sapiens proline rich 25 (PRR25), mRNA [NM_001013638]                                                                                          | gene          | 4.98E-10 | 1.49E-05          | down                     | -6.07                   | 851                 |
| PRR27       | Homo sapiens proline rich 27 (PRR27), mRNA [NM_214711]                                                                                             | gene          | 8.95E-07 | 2.56E-02          | down                     | -3.98                   | 1245                |
| PRR33       | proline rich 33 [Source:HGNC Symbol;Acc:HGNC:35118] [ENST00000391480]                                                                              | gene          | 6.16E-08 | 1.81E-03          | down                     | -1.82                   | 995                 |
| PRR36       | Homo sapiens proline rich 36 (PRR36), transcript variant 1, mRNA [NM_001190467]                                                                    | gene          | 3.83E-09 | 1.14E-04          | down                     | -3.57                   | Not used            |
| PRR36       | Homo sapiens proline rich 36 (PRR36), transcript variant 1, mRNA [NM_001190467]                                                                    | gene          | 2.82E-09 | 8.39E-05          | down                     | -16.78                  | 881                 |
| PRR5L       | Homo sapiens proline rich 5 like (PRR5L), transcript variant 2, mRNA [NM_024841]                                                                   | gene          | 2.07E-08 | 6.11E-04          | up                       | 15.44                   | 727                 |
| PRRC2B      | Homo sapiens proline-rich coiled-coil 2B (PRRC2B), mRNA [NM_013318]                                                                                | gene          | 9.78E-07 | 2.80E-02          | down                     | -2.45                   | 942                 |
| PRRT4       | Homo sapiens proline-rich transmembrane protein 4 (PRRT4), transcript variant 1, mRNA [NM_001174164]                                               | gene          | 1.61E-09 | 4.80E-05          | up                       | 6.69                    | 214                 |
| PRSS23      | Homo sapiens protease, serine, 23 (PRSS23), transcript variant 1, mRNA [NM_007173]                                                                 | gene          | 6.08E-15 | 1.85E-10          | up                       | 23.65                   | 278                 |
| PSAP        | Homo sapiens prosaposin (PSAP), transcript variant 2, mRNA [NM_001042465]                                                                          | gene          | 5.01E-07 | 1.45E-02          | up                       | 3.24                    | 415                 |
| PSMA6       | Homo sapiens proteasome (prosome, macropain) subunit, alpha type, 6 (PSMA6), transcript variant 1, mRNA [NM_002791]                                | gene          | 1.76E-06 | 5.00E-02          | up                       | 1.83                    | 433                 |
| PSMD10      | proteasome (prosome, macropain) 26S subunit, non-ATPase, 10 [Source:HGNC Symbol;Acc:HGNC:9555] [ENST0000038548]                                    | gene          | 9.90E-08 | 2.90E-03          | down                     | -3.46                   | 1230                |
| PSRC1       | Homo sapiens proline/serine-rich coiled-coil 1 (PSRC1), transcript variant 1, mRNA [NM_023636]                                                     | gene          | 3.04E-09 | 9.07E-05          | up                       | 5.18                    | 505                 |
| PSTPIP2     | Homo sapiens proline-serine-threonine phosphatase interacting protein 2 (PSTPIP2), mRNA [NM_024430]                                                | gene          | 6.97E-08 | 2.04E-03          | up                       | 11.16                   | 707                 |
| PTAFR       | Homo sapiens platelet-activating factor receptor (PTAFR), transcript variant 3, mRNA [NM_000952]                                                   | gene          | 1.11E-12 | 3.35E-08          | up                       | 90.96                   | 69                  |
| PTEN        | Homo sapiens phosphatase and tensin homology (PTEN), mRNA [NM_000314]                                                                              | gene          | 1.86E-07 | 5.41E-03          | up                       | 3.08                    | 419                 |
| PTGDR       | Homo sapiens prostaglandin D2 receptor (PTGDR), transcript variant 1, mRNA [NM_000953]                                                             | gene          | 9.14E-07 | 2.62E-02          | up                       | 4.81                    | 384                 |
| PTGDR2      | Homo sapiens prostaglandin D2 receptor 2 (PTGDR2), mRNA [NM_004778]                                                                                | gene          | 7.34E-09 | 2.18E-04          | up                       | 7.26                    | 228                 |
| PTGDS       | prostaglandin D2 synthase 21kDa (brain) [Source:HGNC Symbol;Acc:HGNC:9592] [ENST00000371623]                                                       | gene          | 6.29E-07 | 1.81E-02          | down                     | -2.23                   | 1024                |
| PTGER2      | Homo sapiens prostaglandin E receptor 2 (subtype EP2), 53kDa (PTGER2), mRNA [NM_000956]                                                            | gene          | 1.13E-13 | 3.44E-09          | up                       | 68.58                   | 111                 |
| PTGIR       | Homo sapiens prostaglandin I2 (prostacyclin) receptor (PTGIR), mRNA [NM_000960]                                                                    | gene          | 3.57E-10 | 1.07E-05          | up                       | 20.46                   | 793                 |
| PTGS1       | Homo sapiens prostaglandin-endoperoxide synthase 1 (prostaglandin G/H synthase and cyclooxygenase) (PTGS1), transcript variant 1, mRNA [NM_000962] | gene          | 1.44E-06 | 4.10E-02          | up                       | 9.58                    | 794                 |
| PTGS2       | Homo sapiens prostaglandin-endoperoxide synthase 2 (prostaglandin G/H synthase and cyclooxygenase) (PTGS2), mRNA [NM_000963]                       | gene          | 4.69E-11 | 1.41E-06          | up                       | 62.73                   | 170                 |
| PTK7        | Homo sapiens protein tyrosine kinase 7 (PTK7), transcript variant PTK7-1, mRNA [NM_002821]                                                         | gene          | 4.38E-08 | 1.29E-03          | down                     | -3.24                   | 1255                |
| PTMS        | Homo sapiens parathyrimosin (PTMS), mRNA [NM_002824]                                                                                               | gene          | 6.51E-08 | 1.91E-03          | down                     | -3.75                   | 1232                |
| PTPN5       | Homo sapiens protein tyrosine phosphatase, non-receptor type 5 (striatum-enriched) (PTPN5), transcript variant 1, mRNA [NM_006906]                 | gene          | 1.64E-07 | 4.79E-03          | down                     | -3.47                   | 1041                |
| PTPRE       | Homo sapiens protein tyrosine phosphatase, receptor type, E (PTPRE), transcript variant 1, mRNA [NM_006504]                                        | gene          | 2.65E-09 | 7.89E-05          | up                       | 4.26                    | 390                 |
| PTX3        | Homo sapiens pentraxin 3, long (PTX3), mRNA [NM_002852]                                                                                            | gene          | 4.26E-07 | 1.23E-02          | up                       | 8.84                    | 307                 |
| PXN         | Homo sapiens paxillin (PXN), transcript variant 1, mRNA [NM_002859]                                                                                | gene          | 3.97E-07 | 1.15E-02          | up                       | 8.19                    | 744                 |
| PYGL        | Homo sapiens phosphorylase, glycogen, liver (PYGL), transcript variant 1, mRNA [NM_002863]                                                         | gene          | 1.88E-13 | 5.68E-09          | up                       | 396.27                  | 52                  |
| QARS        | Homo sapiens glutamyl-tRNA synth                                                                                                                   |               |          |                   |                          |                         |                     |

| Gene Symbol | Description                                                                                                                                              | Feature Type | p-value  | Corrected p-value | Regulation in NOTCH1-mut (Mut vs WT) | Fold change | Position in Heatmap |
|-------------|----------------------------------------------------------------------------------------------------------------------------------------------------------|--------------|----------|-------------------|--------------------------------------|-------------|---------------------|
| RGL4        | Homo sapiens ral guanine nucleotide dissociation stimulator-like 4 (RGL4), mRNA [NM_153615]                                                              | gene         | 5.10E-11 | 1.54E-06          | up                                   | 174.53      | 53                  |
| RGS18       | Homo sapiens regulator of G-protein signaling 18 (RGS18), mRNA [NM_130782]                                                                               | gene         | 1.71E-08 | 5.07E-04          | up                                   | 100.03      | 555                 |
| RGS9        | Homo sapiens regulator of G-protein signaling 9 (RGS9), transcript variant 1, mRNA [NM_003835]                                                           | gene         | 2.27E-10 | 6.82E-06          | up                                   | 11.07       | 739                 |
| RHOA        | ras homolog family member A [Source:HGNC Symbol;Acc:HGNC:667] [ENST00000265538]                                                                          | gene         | 6.25E-07 | 1.80E-02          | down                                 | -1.96       | 1125                |
| RHOBTB1     | Homo sapiens Rho-related BTB domain containing 1 (RHOBTB1), transcript variant 4, mRNA [NM_001242359]                                                    | gene         | 3.79E-08 | 1.12E-03          | up                                   | 8.00        | 376                 |
| RHOG        | Homo sapiens ras homolog family member G (RHOG), mRNA [NM_001665]                                                                                        | gene         | 2.43E-07 | 7.05E-03          | up                                   | 3.20        | 453                 |
| RHO         | Homo sapiens ras homolog family member U (RHO), transcript variant 1, mRNA [NM_021205]                                                                   | gene         | 8.97E-14 | 2.72E-09          | up                                   | 21.78       | 790                 |
| RIN1        | Homo sapiens Ras and Rab interactor 1 (RIN1), mRNA [NM_004292]                                                                                           | gene         | 5.57E-08 | 1.64E-03          | up                                   | 4.58        | 324                 |
| RIN2        | Homo sapiens Ras and Rab interactor 2 (RIN2), transcript variant 2, mRNA [NM_018993]                                                                     | gene         | 5.84E-09 | 1.73E-04          | up                                   | 16.30       | 795                 |
| RNASE2      | Homo sapiens ribonuclease, RNase A family, 2 (liver, eosinophil-derived neurotoxin) (RNASE2), mRNA [NM_002934]                                           | gene         | 7.32E-11 | 2.20E-06          | up                                   | 59.32       | Not used            |
| RNASE2      | Homo sapiens ribonuclease, RNase A family, 2 (liver, eosinophil-derived neurotoxin) (RNASE2), mRNA [NM_002934]                                           | gene         | 1.30E-11 | 3.91E-07          | up                                   | 79.90       | 155                 |
| RNASE3      | Homo sapiens ribonuclease, RNase A family, 3 (RNASE3), mRNA [NM_002935]                                                                                  | gene         | 1.32E-09 | 3.94E-05          | up                                   | 39.93       | 156                 |
| RNF126      | Homo sapiens ring finger protein 126 (RNF126), mRNA [NM_194460]                                                                                          | gene         | 2.75E-07 | 7.99E-03          | down                                 | -2.12       | 910                 |
| RNF13       | Homo sapiens ring finger protein 13 (RNF13), transcript variant 1, mRNA [NM_007282]                                                                      | gene         | 1.00E-07 | 2.93E-03          | up                                   | 3.22        | Not used            |
| RNF13       | Homo sapiens ring finger protein 13 (RNF13), transcript variant 1, mRNA [NM_007282]                                                                      | gene         | 1.35E-07 | 3.93E-03          | up                                   | 3.26        | 456                 |
| RNF130      | Homo sapiens ring finger protein 130 (RNF130), transcript variant 1, mRNA [NM_018434]                                                                    | gene         | 9.66E-07 | 2.76E-02          | up                                   | 3.76        | 471                 |
| RNF144A     | Homo sapiens ring finger protein 144A (RNF144A), mRNA [NM_014746]                                                                                        | gene         | 9.49E-10 | 2.84E-05          | up                                   | 7.04        | 227                 |
| RNF149      | Homo sapiens ring finger protein 149 (RNF149), mRNA [NM_173647]                                                                                          | gene         | 1.43E-06 | 3.82E-02          | up                                   | 6.36        | 507                 |
| RNF160      | Homo sapiens ring finger protein 166 (RNF160), transcript variant 1, mRNA [NM_178841]                                                                    | gene         | 4.23E-09 | 1.29E-04          | up                                   | 5.05        | 393                 |
| RNF180      | ring finger protein 180 [Source:HGNC Symbol;Acc:HGNC:27752] [ENST00000296615]                                                                            | gene         | 1.88E-08 | 5.54E-04          | down                                 | -3.24       | 1148                |
| RNF207      | Homo sapiens ring finger protein 207 (RNF207), mRNA [NM_207996]                                                                                          | gene         | 8.93E-08 | 2.44E-03          | up                                   | 7.17        | 514                 |
| RNF24       | Homo sapiens ring finger protein 24 (RNF24), transcript variant 1, mRNA [NM_007219]                                                                      | gene         | 2.27E-07 | 6.59E-03          | up                                   | 4.48        | 457                 |
| ROPN1L      | Homo sapiens rhophilin associated tail protein 1-like (ROPN1L), transcript variant 1, mRNA [NM_031916]                                                   | gene         | 2.59E-08 | 7.65E-04          | up                                   | 10.79       | 781                 |
| RORA        | Homo sapiens RAR-related orphan receptor A (RORA), transcript variant 2, mRNA [NM_134260]                                                                | gene         | 1.23E-08 | 3.65E-04          | up                                   | 17.42       | 591                 |
| RORC        | Homo sapiens RAR-related orphan receptor C (RORC), transcript variant 1, mRNA [NM_005060]                                                                | gene         | 7.19E-11 | 2.16E-06          | up                                   | 13.00       | 595                 |
| RP2         | Homo sapiens retinitis pigmentosa 2 (X-linked recessive) (RP2), mRNA [NM_006915]                                                                         | gene         | 1.21E-06 | 3.46E-02          | up                                   | 2.37        | 428                 |
| RP9P        | Homo sapiens retinitis pigmentosa 9 pseudogene (RP9P), non-coding RNA [NR_003500]                                                                        | gene         | 1.52E-09 | 4.55E-05          | down                                 | -4.19       | 1222                |
| RPL29       | Homo sapiens ribosomal protein L29 (RPL29), mRNA [NM_000992]                                                                                             | gene         | 5.70E-07 | 1.64E-02          | down                                 | -2.70       | 1054                |
| RPSAP58     | Homo sapiens ribosomal protein SA pseudogene 58 (RPSAP58), non-coding RNA [NR_003662]                                                                    | gene         | 1.60E-07 | 4.66E-03          | down                                 | -3.06       | 1221                |
| RRAGD       | Homo sapiens Ras-related GTP binding D (RRAGD), mRNA [NM_021244]                                                                                         | gene         | 1.48E-10 | 4.43E-06          | up                                   | 42.38       | 837                 |
| RRH         | Homo sapiens retinal pigment epithelium-derived rhodopsin homolog (RRH), mRNA [NM_006583]                                                                | gene         | 1.59E-06 | 4.51E-02          | down                                 | -1.82       | 1133                |
| RSAD2       | Homo sapiens radical S-adenosyl methionine domain containing 2 (RSAD2), mRNA [NM_080657]                                                                 | gene         | 4.68E-09 | 1.39E-04          | up                                   | 88.61       | 168                 |
| RTBDN       | Homo sapiens retbindin (RTBDN), transcript variant 2, mRNA [NM_031429]                                                                                   | gene         | 6.15E-08 | 1.81E-03          | down                                 | -3.01       | 965                 |
| RTN3        | Homo sapiens reticulon 3 (RTN3), transcript variant 1, mRNA [NM_006054]                                                                                  | gene         | 6.06E-08 | 1.78E-03          | up                                   | 7.03        | 664                 |
| RUNX2       | Homo sapiens runt-related transcription factor 2 (RUNX2), transcript variant 1, mRNA [NM_001024630]                                                      | gene         | 2.36E-12 | 7.12E-08          | up                                   | 25.85       | 560                 |
| RUNX2       | Homo sapiens runt-related transcription factor 2 (RUNX2), transcript variant 1, mRNA [NM_001015051]                                                      | gene         | 3.06E-07 | 8.87E-03          | up                                   | 4.36        | Not used            |
| S100A11     | Homo sapiens S100 calcium binding protein A11 (S100A11), mRNA [NM_005620]                                                                                | gene         | 1.16E-09 | 3.48E-05          | up                                   | 29.51       | Not used            |
| S100A11     | Homo sapiens S100 calcium binding protein A11 (S100A11), mRNA [NM_005620]                                                                                | gene         | 1.03E-08 | 3.07E-04          | up                                   | 31.90       | 608                 |
| S100A12     | Homo sapiens S100 calcium binding protein A12 (S100A12), mRNA [NM_005621]                                                                                | gene         | 2.18E-18 | 6.64E-14          | up                                   | 1256.46     | Not used            |
| S100A12     | Homo sapiens S100 calcium binding protein A12 (S100A12), mRNA [NM_005621]                                                                                | gene         | 6.70E-19 | 2.04E-14          | up                                   | 1779.21     | 6                   |
| S100A8      | Homo sapiens S100 calcium binding protein A8 (S100A8), mRNA [NM_002964]                                                                                  | gene         | 4.17E-11 | 1.25E-06          | up                                   | 2377.51     | 7                   |
| S100A9      | Homo sapiens S100 calcium binding protein A9 (S100A9), mRNA [NM_002965]                                                                                  | gene         | 2.41E-12 | 7.29E-08          | up                                   | 1378.72     | 8                   |
| S100P       | Homo sapiens S100 calcium binding protein P (S100P), mRNA [NM_005980]                                                                                    | gene         | 2.30E-15 | 7.28E-11          | up                                   | 302.08      | 29                  |
| S100Z       | Homo sapiens S100 calcium binding protein Z (S100Z), mRNA [NM_130772]                                                                                    | gene         | 2.99E-14 | 9.08E-10          | up                                   | 31.94       | 289                 |
| S1PR3       | Homo sapiens sphingosine-1-phosphate receptor 3 (S1PR3), mRNA [NM_005226]                                                                                | gene         | 1.25E-14 | 3.80E-10          | up                                   | 52.00       | 295                 |
| S1PR5       | Homo sapiens sphingosine-1-phosphate receptor 5 (S1PR5), transcript variant 1, mRNA [NM_030760]                                                          | gene         | 2.26E-11 | 6.81E-07          | up                                   | 38.75       | 196                 |
| SAMD3       | Homo sapiens sterile alpha motif domain containing 3 (SAMD3), transcript variant 1, mRNA [NM_001017373]                                                  | gene         | 6.58E-11 | 1.98E-06          | up                                   | 57.71       | 568                 |
| SAMD3       | Homo sapiens sterile alpha motif domain containing 3 (SAMD3), transcript variant 3, mRNA [NM_001258275]                                                  | gene         | 3.39E-12 | 1.03E-07          | up                                   | 23.82       | Not used            |
| SAMHD1      | Homo sapiens SAM domain and HD domain 1 (SAMHD1), mRNA [NM_015474]                                                                                       | gene         | 2.25E-09 | 6.71E-05          | up                                   | 16.22       | 792                 |
| SAP30       | Homo sapiens Sirt3-associated protein, 30kDa (SAP30), mRNA [NM_003864]                                                                                   | gene         | 1.69E-11 | 5.10E-07          | up                                   | 17.10       | 700                 |
| SASH3       | Homo sapiens SAM and SH3 domain containing 3 (SASH3), mRNA [NM_018990]                                                                                   | gene         | 8.31E-07 | 2.38E-02          | up                                   | 1.99        | 424                 |
| SAT1        | Homo sapiens spermidine/spermine N1-acetyltransferase 1 (SAT1), transcript variant 1, mRNA [NM_002970]                                                   | gene         | 8.02E-07 | 2.30E-02          | up                                   | 3.88        | 351                 |
| SATB1-AS1   | Homo sapiens SATB1 antisense RNA 1 (SATB1-AS1), long non-coding RNA [NR_125803]                                                                          | ncRNA        | 3.64E-09 | 1.08E-04          | up                                   | 8.34        | Not used            |
| SATB1-AS1   | Homo sapiens SATB1 antisense RNA 1 (SATB1-AS1), long non-coding RNA [NR_125803]                                                                          | ncRNA        | 1.44E-08 | 4.27E-04          | up                                   | 8.35        | Not used            |
| SATB1-AS1   | Homo sapiens SATB1 antisense RNA 1 (SATB1-AS1), long non-coding RNA [NR_125803]                                                                          | ncRNA        | 2.24E-09 | 6.68E-05          | up                                   | 9.75        | Not used            |
| SATB1-AS1   | Homo sapiens SATB1 antisense RNA 1 (SATB1-AS1), long non-coding RNA [NR_125803]                                                                          | ncRNA        | 1.40E-10 | 4.20E-06          | up                                   | 31.28       | Not used            |
| SCAR3       | Homo sapiens scavenger receptor class A, member 3 (SCAR3), transcript variant 1, mRNA [NM_016240]                                                        | gene         | 4.71E-07 | 1.36E-02          | down                                 | -2.46       | 929                 |
| SCARF1      | Homo sapiens scavenger receptor class F, member 1 (SCARF1), transcript variant 1, mRNA [NM_003693]                                                       | gene         | 4.78E-11 | 1.44E-06          | up                                   | 5.56        | 642                 |
| SCARF2      | Homo sapiens scavenger receptor class F, member 2 (SCARF2), transcript variant 1, mRNA [NM_153334]                                                       | gene         | 1.91E-11 | 5.75E-07          | down                                 | -6.33       | 869                 |
| SCGB3A1     | Homo sapiens secretoglobulin, family 3A, member 1 (SCGB3A1), mRNA [NM_052863]                                                                            | gene         | 1.84E-12 | 5.55E-08          | down                                 | -5.12       | 870                 |
| SDCBP       | Homo sapiens syndecan binding protein (syntenin) (SDCBP), transcript variant 1, mRNA [NM_005652]                                                         | gene         | 1.86E-07 | 5.41E-03          | up                                   | 3.78        | 454                 |
| SDR39U1     | Homo sapiens short chain dehydrogenase/reductase family 39U, member 1 (SDR39U1), transcript variant 1, mRNA [NM_020195]                                  | gene         | 3.20E-07 | 9.27E-03          | down                                 | -1.85       | 1088                |
| SEC14L4     | Homo sapiens SEC14-like 4 (S. cerevisiae) (SEC14L4), transcript variant 1, mRNA [NM_174977]                                                              | gene         | 6.17E-07 | 1.78E-02          | down                                 | -3.29       | 1161                |
| SECTM1      | Homo sapiens secreted and transmembrane 1 (SECTM1), mRNA [NM_003004]                                                                                     | gene         | 2.35E-11 | 7.09E-07          | up                                   | 213.01      | 19                  |
| SELPLG      | Homo sapiens selectin P ligand (SELPLG), transcript variant 1, mRNA [NM_001206609]                                                                       | gene         | 1.40E-07 | 4.08E-03          | up                                   | 6.11        | Not used            |
| SEMA4C      | Homo sapiens sema domain, immunoglobulin domain (Ig), transmembrane domain (TM) and short cytoplasmic domain, (semaphorin) 4C (SEMA4C), mRNA [NM_017789] | gene         | 2.45E-08 | 7.25E-04          | up                                   | 11.40       | 693                 |
| SERPINA1    | Homo sapiens serpin peptidase inhibitor, clade A (alpha1-antitrypsin, antitrypsin), member 1 (SERPINA1), transcript variant 2, mRNA [NM_001002236]       | gene         | 3.40E-12 | 1.03E-07          | up                                   | 16.25       | 374                 |
| SERPINA1    | Homo sapiens serpin peptidase inhibitor, clade A (alpha1-antitrypsin, antitrypsin), member 1 (SERPINA1), transcript variant 2, mRNA [NM_001002236]       | gene         | 1.54E-19 | 4.68E-15          | up                                   | 264.36      | 65                  |
| SERPINB10   | Homo sapiens serpin peptidase inhibitor, clade B (ovalbumin), member 10 (SERPINB10), mRNA [NM_005024]                                                    | gene         | 1.05E-06 | 3.01E-02          | up                                   | 4.78        | 208                 |
| SERPINC1    | Homo sapiens serpin peptidase inhibitor, clade C (C1 inhibitor), member 1 (SERPINC1), transcript variant 1, mRNA [NM_000062]                             | gene         | 8.14E-07 | 2.33E-02          | up                                   | 8.12        | 515                 |
| SFTA1P      | AGENCOURT_10018270 NIH_MGC_142 Homo sapiens cDNA clone IMAGE:64950001, mRNA sequence [BU601128]                                                          | gene         | 1.09E-08 | 3.22E-04          | down                                 | -11.66      | 880                 |
| SFTA1P      | Homo sapiens surfactant associated 1, pseudogene (SFTA1P), non-coding RNA [NR_027082]                                                                    | pseudogene   | 5.35E-09 | 1.59E-04          | down                                 | -2.48       | Not used            |
| SFXN5       | Homo sapiens sideroflexin 5 (SFXN5), mRNA [NM_144579]                                                                                                    | gene         | 1.48E-06 | 4.20E-02          | down                                 | -2.86       | 1025                |
| SGK1        | Homo sapiens serum/glucocorticoid regulated kinase 1 (SGK1), transcript variant 1, mRNA [NM_005627]                                                      | gene         | 3.71E-09 | 1.11E-04          | up                                   | 29.14       | 550                 |
| SH2D1A      | Homo sapiens SH2 domain containing 1A (SH2D1A), transcript variant 2, mRNA [NM_00114937]                                                                 | gene         | 4.29E-10 | 1.28E-05          | up                                   | 17.98       | Not used            |
| SH2D1A      | Homo sapiens SH2 domain containing 1A (SH2D1A), transcript variant 1, mRNA [NM_002351]                                                                   | gene         | 3.64E-12 | 1.10E-07          | up                                   | 22.80       | Not used            |
| SH2D1A      | Homo sapiens SH2 domain containing 1A (SH2D1A), transcript variant 1, mRNA [NM_002351]                                                                   | gene         | 3.85E-14 | 1.17E-09          | up                                   | 57.38       | 197                 |
| SH2D1B      | Homo sapiens SH2 domain containing 1B (SH2D1B), mRNA [NM_053282]                                                                                         | gene         | 2.68E-09 | 7.99E-05          | up                                   | 33.16       | 562                 |
| SH2D2A      | Homo sapiens SH2 domain containing 2A (SH2D2A), transcript variant 5, mRNA [NM_001161444]                                                                | gene         | 3.71E-09 | 1.10E-04          | up                                   | 9.71        | 374                 |
| SHANK2      | Homo sapiens SH3 and multiple ankyrin repeat domains 2 (SHANK2), transcript variant 1, mRNA [NM_012309]                                                  | gene         | 5.71E-07 | 1.64E-02          | down                                 | -3.80       | 1256                |
| SHISA7      | Homo sapiens shisa family member 7 (SHISA7), mRNA [NM_001145176]                                                                                         | gene         | 3.69E-09 | 1.07E-02          | down                                 | -3.06       | 1006                |
| SHQ1        | Homo sapiens SHQ1, H/ACA ribonucleoprotein assembly factor (SHQ1), mRNA [NM_018130]                                                                      | gene         | 7.17E-07 | 2.06E-02          | down                                 | -2.85       | 1059                |
| SIGLEC17P   | sialic acid binding Ig-like lectin 17, pseudogene [Source:HGNC Symbol;Acc:HGNC:15604] [ENST00000061992]                                                  | gene         | 3.64E-07 | 1.05E-02          | up                                   | 19.25       | 738                 |
| SIGLEC7     | Homo sapiens sialic acid binding Ig-like lectin 7 (SIGLEC7), transcript variant 1, mRNA [NM_014385]                                                      | gene         | 1.69E-08 | 5.00E-04          | up                                   | 7.21        | 694                 |
| SIGLEC9     | Homo sapiens sialic acid binding Ig-like lectin 9 (SIGLEC9), transcript variant 2, mRNA [NM_014441]                                                      | gene         | 5.41E-07 | 1.56E-02          | up                                   | 7.64        | 761                 |
| SIPA1L2     | Homo sapiens signal-induced proliferation-associated 1 like 2 (SIPA1L2), mRNA [NM_020808]                                                                | gene         | 5.64E-14 | 1.71E-09          | up                                   | 54.38       | 173                 |
| SIRPA       | Homo sapiens signal-regulatory protein alpha (SIRPA), transcript variant 1, mRNA [NM_001040022]                                                          | gene         | 4.78E-10 | 1.43E-05          | up                                   | 55.70       | 120                 |
| SIRPB1      | Homo sapiens signal-regulatory protein beta 1 (SIRPB1), transcript variant 3, mRNA [NM_00135844]                                                         | gene         | 3.06E-13 | 9.28E-09          | up                                   | 12.45       | 702                 |
| SIRPB1      | Homo sapiens signal-regulatory protein beta 1 (SIRPB1), transcript variant 1, mRNA [NM_006065]                                                           | gene         | 1.03E-06 | 2.96E-02          | up                                   | 3.80        | Not used            |
| SIRPB1      | Homo sapiens signal-regulatory protein beta 1 (SIRPB1), transcript variant 1, mRNA [NM_006065]                                                           | gene         | 2.53E-07 | 1.02E-02          | up                                   | 6.33        | Not used            |
| SIRPB2      | Homo sapiens signal-regulatory protein beta 2 (SIRPB2), transcript variant 1, mRNA [NM_001122962]                                                        | gene         | 5.37E-09 | 1.59E-04          | up                                   | 12.17       | 703                 |
| SIRPB2      | signal-regulatory protein beta 2 [Source:HGNC Symbol;Acc:HGNC:16247] [ENST00000486775]                                                                   | gene         | 1.14E-08 | 3.37E-04          | up                                   | 10.35       | Not used            |
| SIRPD       | Homo sapiens signal-regulatory protein delta (SIRPD), mRNA [NM_178460]                                                                                   | gene         | 1.32E-11 | 3.97E-07          | up                                   | 19.83       | 686                 |
| SIRPG       | Homo sapiens signal-regulatory protein gamma (SIRPG), transcript variant 3, mRNA [NM_001039508]                                                          | gene         | 2.26E-10 | 8.03E-06          | up                                   | 7.75        | Not used            |
| SIRPG       | Homo sapiens signal-regulatory protein gamma (SIRPG), transcript variant 1, mRNA [NM_018556]                                                             | gene         | 1.01E-12 | 3.05E-08          | up                                   | 69.94       | 109                 |
| SLAMF8      | Homo sapiens SLAM family member 8 (SLAMF8), mRNA [NM_020125]                                                                                             | gene         | 1.05E-06 | 3.60E-02          | up                                   | 8.16        | 508                 |
| SLC11A1     | solute carrier family 11 (proton-coupled divalent metal ion transporter), member 1 [Source:HGNC Symbol;Acc:HGNC:10907] [ENST00000469799]                 | gene         | 1.23E-11 | 3.72E-07          | up                                   | 9.13        | Not used            |
| SLC11A1     | Homo sapiens solute carrier family 11 (proton-coupled divalent metal ion transporter), member 1 (SLC11A1), mRNA [NM_000578]                              | gene         | 3.41E-13 | 1.03E-08          | up                                   | 13.36       | Not used            |
| SLC11A1     | Homo sapiens solute carrier family 11 (proton-coupled divalent metal ion transporter), member 1 (SLC11A1), mRNA [NM_000578]                              | gene         | 3.03E-17 | 9.22E-13          | up                                   | 36.94       | 836                 |
| SLC17A7     | Homo sapiens solute carrier family 17 (vesicular glutamate transporter), member 7 (SLC17A7), mRNA [NM_020309]                                            | gene         | 9.58E-07 | 2.74E-02          | down                                 | -1.91       | 957                 |
| SLC19A1     | Homo sapiens solute carrier family 19 (folate transporter), member 1 (SLC19A1), transcript variant 2, mRNA [NM_001205206]                                | gene         | 7.29E-08 | 2.14E-03          | up                                   | 3.50        | Not used            |
| SLC19A1     | Homo sapiens solute carrier family 19 (folate transporter), member 1 (SLC19A1), transcript variant 1, mRNA [NM_194255]                                   | gene         | 9.26E-11 | 2.78E-06          | up                                   | 17.76       | 705                 |
| SLC19A3     | solute carrier family 19 (thiamine transporter), member 3 [Source:HGNC Symbol;Acc:HGNC:16266] [ENST0000049456]                                           | gene         | 7.08E-07 | 2.03E-02          | down                                 | -4.15       | 1162                |
| SLC22A1     | Homo sapiens solute carrier family 22 (organic cation transporter), member 1 (SLC22A1), transcript variant 2, mRNA [NM_153187]                           | gene         | 9.68E-09 | 2.87E-04          | up                                   | 3.29        | 485                 |
| SLC22A18A5  | Homo sapiens solute carrier family 22 (organic cation transporter), member 18 antisense (SLC22A18                                                        |              |          |                   |                                      |             |                     |

| Gene Symbol | Description                                                                                                                                                      | Feature Type | p-value  | Corrected p-value | Regulation in NOTCH1-mut | Fold change (Mut vs WT) | Position in Heatmap |
|-------------|------------------------------------------------------------------------------------------------------------------------------------------------------------------|--------------|----------|-------------------|--------------------------|-------------------------|---------------------|
| SLPI        | Homo sapiens secretory leukocyte peptidase inhibitor (SLPI), mRNA [NM_003064]                                                                                    | gene         | 4.95E-13 | 1.50E-08          | up                       | 82.68                   | 63                  |
| SMAD1       | Homo sapiens SMAD family member 1 (SMAD1), transcript variant 1, mRNA [NM_005900]                                                                                | gene         | 7.14E-11 | 2.15E-06          | up                       | 8.57                    | 239                 |
| SMARCD3     | Homo sapiens SWI/SNF related, matrix associated, actin dependent regulator of chromatin, subfamily 4, member 3 (SMARCD3), transcript variant 2, mRNA [NM_003078] | gene         | 1.04E-12 | 3.15E-08          | up                       | 11.88                   | 329                 |
| SMCO4       | Homo sapiens single-pass membrane protein with coiled-coil domains 4 (SMCO4), mRNA [NM_020179]                                                                   | gene         | 7.50E-07 | 2.15E-02          | up                       | 12.27                   | 695                 |
| SMG9        | Homo sapiens SMG9 nonsense mediated mRNA decay factor (SMG9), mRNA [NM_019108]                                                                                   | gene         | 9.08E-07 | 2.60E-02          | down                     | -2.16                   | 1083                |
| SMIM3       | Homo sapiens small integral membrane protein 3 (SMIM3), mRNA [NM_032947]                                                                                         | gene         | 1.48E-07 | 4.31E-03          | up                       | 64.25                   | 112                 |
| SMPDL3A     | Homo sapiens sphingomyelin phosphodiesterase, acid-like 3A (SMPDL3A), transcript variant 1, mRNA [NM_006714]                                                     | gene         | 2.36E-09 | 7.04E-05          | up                       | 18.98                   | 708                 |
| SNAR-A3     | Homo sapiens small ILF3/NF90-associated RNA A3 (SNAR-A3), small nuclear RNA [NR_024214]                                                                          | gene         | 9.68E-08 | 2.83E-03          | down                     | -2.88                   | 972                 |
| SNCA        | Homo sapiens synuclein, alpha (non A4 component of amyloid precursor) (SNCA), transcript variant 4, mRNA [NM_007308]                                             | gene         | 1.74E-07 | 5.08E-03          | up                       | 11.60                   | 710                 |
| SNHG11      | Homo sapiens small nucleolar RNA host gene 11 (non-protein coding) (SNHG11), long non-coding RNA [NR_003299]                                                     | gene         | 5.00E-13 | 1.51E-08          | down                     | -10.63                  | 873                 |
| SNORA70A    | UI-H-DT0-aub-m-04-U-01.S1.NC1.CGAP.DT0.Homo sapiens cDNA clone IMAGE:5867307 3', mRNA sequence [BM912661]                                                        | gene         | 8.04E-07 | 2.31E-02          | down                     | -2.66                   | 1017                |
| SNOR417B    | AGENCOURT.8611325.NIH.MGC.106.Homo sapiens cDNA clone IMAGE:5485440 5', mRNA sequence [BM918074]                                                                 | gene         | 1.18E-08 | 3.48E-04          | down                     | -5.94                   | 1166                |
| SNRPD2P2    | Homo sapiens small nuclear ribonucleoprotein D2 pseudogene 2 (SNRPD2P2), non-coding RNA [NR_033826]                                                              | gene         | 6.00E-07 | 1.73E-02          | down                     | -3.27                   | 1273                |
| SNTB1       | Homo sapiens syntrophin, beta 1 (dystrophin-associated protein 1, 59kDa, basic component 1) (SNTB1), mRNA [NM_021021]                                            | gene         | 9.72E-13 | 2.94E-08          | up                       | 17.89                   | 787                 |
| SOC2        | Homo sapiens suppressor of cytokine signaling 2 (SOC2), transcript variant 1, mRNA [NM_003877]                                                                   | gene         | 9.87E-08 | 2.89E-03          | up                       | 9.28                    | 656                 |
| SOC3        | Homo sapiens suppressor of cytokine signaling 3 (SOC3), mRNA [NM_003955]                                                                                         | gene         | 1.79E-09 | 5.34E-05          | up                       | 38.10                   | 58                  |
| SOD2        | Homo sapiens superoxide dismutase 2, mitochondrial (SOD2), transcript variant 2, mRNA [NM_001024465]                                                             | gene         | 1.66E-14 | 5.04E-10          | up                       | 19.44                   | 622                 |
| SORBS2      | Homo sapiens sorbin and SH3 domain containing 2 (SORBS2), transcript variant 9, mRNA [NM_001270771]                                                              | gene         | 9.85E-08 | 2.88E-03          | down                     | -3.69                   | 1036                |
| SORBS3      | Homo sapiens sorbin and SH3 domain containing 2 (SORBS3), transcript variant 1, mRNA [NM_005753]                                                                 | gene         | 3.60E-07 | 1.04E-02          | down                     | -3.74                   | 1236                |
| SORL1       | Homo sapiens sortilin-related receptor, 1 (LDLR class) A repeats containing (SORL1), mRNA [NM_003105]                                                            | gene         | 1.81E-09 | 5.39E-05          | up                       | 236.88                  | 1443                |
| SORT1       | Homo sapiens sortilin 1 (SORT1), transcript variant 1, mRNA [NM_002959]                                                                                          | gene         | 3.11E-07 | 9.01E-03          | up                       | 65.16                   | 519                 |
| SP8         | Homo sapiens Sp8 transcription factor (SP8), transcript variant 2, mRNA [NM_198956]                                                                              | gene         | 3.85E-10 | 1.15E-05          | down                     | -4.83                   | 1165                |
| SPACA6P     | Homo sapiens sperm acrosome associated 6, pseudogene (SPACA6P), long non-coding RNA [NR_024330]                                                                  | gene         | 3.48E-08 | 1.02E-03          | up                       | 7.98                    | 379                 |
| SPATA6      | Homo sapiens spermatogenesis associated 6 (SPATA6), transcript variant 1, mRNA [NM_019073]                                                                       | gene         | 7.06E-11 | 2.12E-06          | up                       | 6.22                    | 512                 |
| SPEF2       | Homo sapiens sperm flagellar 2 (SPEF2), transcript variant 2, mRNA [NM_144722]                                                                                   | gene         | 1.63E-10 | 4.89E-06          | up                       | 6.96                    | 219                 |
| SPI1        | Homo sapiens Spi-1 proto-oncogene (SPI1), transcript variant 1, mRNA [NM_001080547]                                                                              | gene         | 8.10E-11 | 2.43E-06          | up                       | 5.53                    | 399                 |
| SPINK7      | Homo sapiens serine peptidase inhibitor, Kazal type 7 (putative) (SPINK7), mRNA [NM_032566]                                                                      | gene         | 1.18E-06 | 3.37E-02          | down                     | -1.91                   | 1127                |
| SPINK8      | Homo sapiens serine peptidase inhibitor, Kazal type 8 (putative) (SPINK8), mRNA [NM_001080525]                                                                   | gene         | 3.56E-10 | 1.07E-05          | up                       | 12.68                   | 782                 |
| SPINT3      | Homo sapiens serine peptidase inhibitor, Kunitz type 3 (SPINT3), mRNA [NM_006652]                                                                                | gene         | 9.16E-07 | 2.62E-02          | down                     | -3.59                   | 1049                |
| SPNS2       | Homo sapiens spinster homolog 2 (Drosophila) (SPNS2), mRNA [NM_001124758]                                                                                        | gene         | 1.84E-07 | 5.35E-03          | up                       | 2.74                    | 409                 |
| SPRN1P      | Homo sapiens shadow of prion protein homolog (zebrafish) pseudogene 1 (SPRN1P), non-coding RNA [NR_033789]                                                       | gene         | 4.87E-07 | 1.41E-02          | down                     | -2.47                   | 932                 |
| SPRR2E      | Homo sapiens small proline-rich protein 2E (SPRR2E), mRNA [NM_001024209]                                                                                         | gene         | 2.10E-07 | 6.12E-03          | down                     | -2.16                   | 997                 |
| SPSB1       | Homo sapiens splanchnin receptor domain and SOCS box containing 1 (SPSB1), mRNA [NM_025106]                                                                      | gene         | 1.99E-09 | 5.95E-05          | up                       | 13.80                   | 734                 |
| SREBF1      | Homo sapiens steroid regulatory element binding transcription factor 1 (SREBF1), transcript variant 1, mRNA [NM_001005291]                                       | gene         | 1.39E-06 | 3.95E-02          | down                     | -2.33                   | 1124                |
| SRGN        | Homo sapiens serglycin (SRGN), transcript variant 1, mRNA [NM_002727]                                                                                            | gene         | 1.24E-09 | 3.69E-05          | up                       | 7.40                    | 665                 |
| SRMS        | Homo sapiens src-related kinase lacking C-terminal regulatory tyrosine and N-terminal myristylation sites (SRMS), mRNA [NM_0080823]                              | gene         | 3.17E-11 | 9.56E-07          | up                       | 11.34                   | 646                 |
| SRXN1       | Homo sapiens sulfiredoxin 1 (SRXN1), mRNA [NM_080725]                                                                                                            | gene         | 1.23E-11 | 3.72E-07          | up                       | 52.06                   | 118                 |
| SSPO        | SCO-spondin [Source:HGNC Symbol;Acc:HGNC:21998] [ENST00000472850]                                                                                                | gene         | 4.01E-09 | 1.19E-04          | down                     | -2.83                   | 898                 |
| SSX3        | Homo sapiens synovial sarcoma, X breakpoint 3 (SSX3), mRNA [NM_021014]                                                                                           | gene         | 9.37E-07 | 2.68E-02          | down                     | -2.23                   | 1108                |
| ST3GAL4     | Homo sapiens ST3 beta-galactoside alpha-2,3-sialyltransferase 4 (ST3GAL4), transcript variant 1, mRNA [NM_006278]                                                | gene         | 8.25E-12 | 2.49E-07          | up                       | 9.54                    | 720                 |
| ST3GAL6     | Homo sapiens ST3 beta-galactoside alpha-2,3-sialyltransferase 6 (ST3GAL6), transcript variant 1, mRNA [NM_006100]                                                | gene         | 1.51E-14 | 4.57E-10          | up                       | 31.52                   | 253                 |
| ST6GALNAC2  | Homo sapiens ST6 (alpha-N-acetyl-neuraminyl-2,3-beta-galactosyl-1,3)-N-acetylgalactosaminide alpha-2,6-sialyltransferase 2 (ST6GALNAC2), mRNA [NM_006456]        | gene         | 3.19E-13 | 9.64E-09          | up                       | 38.25                   | 177                 |
| STAB1       | Homo sapiens stabilin 1 (STAB1), mRNA [NM_015136]                                                                                                                | gene         | 6.82E-14 | 2.07E-09          | up                       | 21.14                   | 301                 |
| STAT5B      | Homo sapiens signal transducer and activator of transcription 5B (STAT5B), mRNA [NM_012448]                                                                      | gene         | 1.07E-06 | 3.07E-02          | up                       | 3.87                    | 477                 |
| STAP4       | Homo sapiens STEAP family member 4 (STAP4), transcript variant 2, mRNA [NM_001205315]                                                                            | gene         | 1.10E-09 | 3.29E-05          | up                       | 20.56                   | Not used            |
| STAP4       | Homo sapiens STEAP family member 4 (STAP4), transcript variant 2, mRNA [NM_001205315]                                                                            | gene         | 3.04E-15 | 9.24E-11          | up                       | 65.17                   | 179                 |
| STOM        | Homo sapiens stomatin (STOM), transcript variant 2, mRNA [NM_198194]                                                                                             | gene         | 2.26E-07 | 6.58E-03          | up                       | 12.86                   | 625                 |
| STX3        | Homo sapiens syntaxin 3 (STX3), transcript variant 1, mRNA [NM_004177]                                                                                           | gene         | 2.30E-08 | 6.80E-04          | up                       | 19.40                   | 624                 |
| SUPT20H1    | Homo sapiens suppressor of Ty 20 homolog (S. cerevisiae)-like 1 (SUPT20H1), mRNA [NM_001136234]                                                                  | gene         | 2.68E-07 | 7.79E-03          | down                     | -4.17                   | 1258                |
| SUV420H2    | suppressor of variegation 4-20 homolog 2 (Drosophila) [Source:HGNC Symbol;Acc:HGNC:28405] [ENST000000402499]                                                     | gene         | 1.68E-06 | 4.22E-02          | down                     | -2.48                   | 949                 |
| SVEP1       | Homo sapiens sushi, von Willebrand factor type A, EGF and pentraxin domain containing 1 (SVEP1), mRNA [NM_153366]                                                | gene         | 2.02E-08 | 5.96E-04          | down                     | -5.06                   | 1180                |
| SVIL        | Homo sapiens suppressor villin (SVIL), transcript variant 2, mRNA [NM_021738]                                                                                    | gene         | 9.52E-14 | 2.89E-09          | up                       | 41.66                   | 85                  |
| SYCP1       | Homo sapiens synaptonemal complex protein 1 (SYCP1), transcript variant 1, mRNA [NM_003176]                                                                      | gene         | 3.00E-07 | 8.71E-03          | down                     | -3.13                   | 1067                |
| SYNE1       | Homo sapiens spectrin repeat containing, nuclear envelope 1 (SYNE1), transcript variant 2, mRNA [NM_033071]                                                      | gene         | 3.24E-11 | 9.76E-07          | up                       | 16.70                   | 740                 |
| SYNJ1       | Homo sapiens synaptotagmin 1 (SYNJ1), transcript variant 2, mRNA [NM_203446]                                                                                     | gene         | 1.18E-06 | 3.36E-02          | up                       | 3.25                    | 460                 |
| SYNJ2       | synaptotagmin 2 [Source:HGNC Symbol;Acc:HGNC:11504] [ENST00000449320]                                                                                            | gene         | 7.44E-07 | 2.14E-02          | down                     | -4.01                   | 1274                |
| SYNM        | Homo sapiens synemin, intermediate filament protein (SYNM), transcript variant 4, mRNA [NM_145728]                                                               | gene         | 1.46E-08 | 4.31E-04          | up                       | 11.46                   | 373                 |
| SYT2        | Homo sapiens synaptotagmin II (SYT2), transcript variant 2, mRNA [NM_001136504]                                                                                  | gene         | 3.02E-07 | 8.75E-03          | down                     | -3.58                   | 1261                |
| TAAR8       | Homo sapiens trace amine associated receptor 8 (TAAR8), mRNA [NM_053278]                                                                                         | gene         | 4.18E-07 | 1.21E-02          | down                     | -4.34                   | 1253                |
| TACSTD2     | Homo sapiens tumor-associated calcium signal transducer 2 (TACSTD2), mRNA [NM_002353]                                                                            | gene         | 5.08E-11 | 1.53E-06          | up                       | 10.92                   | 215                 |
| TALDO1      | Homo sapiens transfaldolase 1 (TALDO1), mRNA [NM_006755]                                                                                                         | gene         | 1.40E-06 | 3.98E-02          | up                       | 9.00                    | 650                 |
| TAPT1-AS1   | Homo sapiens TAPT1 antisense RNA 1 (head to head) (TAPT1-AS1), transcript variant 1, long non-coding RNA [NR_027696]                                             | ncRNA        | 4.42E-08 | 1.30E-03          | down                     | -2.04                   | Not used            |
| TARP        | Homo sapiens TCR gamma alternate reading frame protein (TARP), transcript variant 1, mRNA [NM_001003799]                                                         | gene         | 5.91E-10 | 1.77E-05          | up                       | 38.87                   | 587                 |
| TAS2R9      | Homo sapiens taste receptor, type 2, member 9 (TAS2R9), mRNA [NM_023917]                                                                                         | gene         | 3.80E-07 | 1.10E-02          | down                     | -4.90                   | 1214                |
| TBC1D2      | Homo sapiens TBC1 domain family, member 2 (TBC1D2), transcript variant 1, mRNA [NM_001267571]                                                                    | gene         | 1.41E-08 | 4.17E-04          | up                       | 5.63                    | 819                 |
| TBC1D4      | Homo sapiens TBC1 domain family, member 4 (TBC1D4), transcript variant 1, mRNA [NM_014832]                                                                       | gene         | 1.28E-11 | 3.86E-07          | up                       | 19.63                   | 798                 |
| TBC1D8      | Homo sapiens TBC1 domain family, member 8 (with GRAM domain) (TBC1D8), mRNA [NM_001102426]                                                                       | gene         | 3.27E-09 | 1.00E-04          | up                       | 17.40                   | 596                 |
| TBL3        | transducin (beta)-like 3 [Source:HGNC Symbol;Acc:HGNC:11587] [ENST00000568546]                                                                                   | gene         | 4.73E-07 | 1.37E-02          | down                     | -2.16                   | 895                 |
| TBX10       | Homo sapiens T-box 10 (TBX10), mRNA [NM_005995]                                                                                                                  | gene         | 1.37E-06 | 3.91E-02          | down                     | -2.57                   | 1020                |
| TBX21       | Homo sapiens T-box 21 (TBX21), mRNA [NM_013351]                                                                                                                  | gene         | 8.50E-07 | 2.44E-02          | up                       | 2.76                    | 422                 |
| TBXAS1      | Homo sapiens thromboxane A synthase 1 (platelet) (TBXAS1), transcript variant 2, mRNA [NM_030984]                                                                | gene         | 2.45E-08 | 7.23E-04          | up                       | 4.87                    | 500                 |
| TC2N        | Homo sapiens tandem C2 domains, nuclear (TC2N), transcript variant 1, mRNA [NM_152332]                                                                           | gene         | 1.66E-11 | 5.00E-07          | up                       | 31.26                   | 589                 |
| TCEANC2     | Homo sapiens transcription elongation factor A (SII) N-terminal and central domain containing 2 (TCEANC2), mRNA [NM_153035]                                      | gene         | 5.35E-07 | 1.54E-02          | down                     | -1.94                   | 1119                |
| TCF7L2      | Homo sapiens transcription factor 7-like 2 (T-cell specific, HMG-box) (TCF7L2), transcript variant 13, mRNA [NM_001198531]                                       | gene         | 8.75E-07 | 2.51E-02          | up                       | 5.21                    | Not used            |
| TCF7L2      | Homo sapiens transcription factor 7-like 2 (T-cell specific, HMG-box) (TCF7L2), transcript variant 2, mRNA [NM_030756]                                           | gene         | 8.49E-13 | 2.57E-08          | up                       | 6.47                    | 513                 |
| TCN1        | Homo sapiens transcobalamin 1 (vitamin B12 binding protein, R binder family) (TCN1), mRNA [NM_001062]                                                            | gene         | 5.82E-12 | 1.76E-07          | up                       | 29.64                   | 201                 |
| TCTE1       | Homo sapiens t-complex-associated-testis-expressed 1 (TCTE1), mRNA [NM_182539]                                                                                   | gene         | 9.33E-08 | 2.73E-03          | down                     | -5.19                   | 1074                |
| TENM1       | Homo sapiens teneurin transmembrane protein 1 (TENM1), transcript variant 1, mRNA [NM_001163278]                                                                 | gene         | 1.08E-09 | 3.22E-05          | up                       | 4.58                    | 490                 |
| TEX101      | Homo sapiens testis expressed 101 (TEX101), transcript variant 1, mRNA [NM_031451]                                                                               | gene         | 2.47E-07 | 7.16E-03          | down                     | -3.09                   | 1208                |
| TFF1        | Homo sapiens trefoil factor 1 (TFF1), mRNA [NM_003225]                                                                                                           | gene         | 3.00E-07 | 8.70E-03          | down                     | -2.83                   | 976                 |
| TFF3        | Homo sapiens trefoil factor 3 (intestinal) (TFF3), mRNA [NM_003226]                                                                                              | gene         | 3.39E-08 | 9.98E-04          | up                       | 6.20                    | 216                 |
| TGIF1       | Homo sapiens TGFB-induced factor homeobox 1 (TGIF1), transcript variant 5, mRNA [NM_173209]                                                                      | gene         | 4.33E-07 | 1.25E-02          | down                     | -3.48                   | 990                 |
| TGIF2LY     | Homo sapiens TGFB-induced factor homeobox 2-like, Y-linked (TGIF2LY), mRNA [NM_139214]                                                                           | gene         | 6.26E-07 | 1.80E-02          | down                     | -3.52                   | 1270                |
| TGM3        | Homo sapiens transglutaminase 3 (TGM3), mRNA [NM_003245]                                                                                                         | gene         | 7.29E-07 | 2.09E-02          | up                       | 5.69                    | 825                 |
| THBD        | Homo sapiens thrombomodulin (THBD), mRNA [NM_000361]                                                                                                             | gene         | 2.31E-12 | 6.99E-08          | up                       | 125.50                  | 56                  |
| THEMIS      | Homo sapiens thymocyte selection associated (THEMIS), transcript variant 1, mRNA [NM_001164685]                                                                  | gene         | 7.52E-12 | 2.27E-07          | up                       | 50.10                   | 799                 |
| TIAM1       | Homo sapiens T-cell lymphoma invasion and metastasis 1 (TIAM1), mRNA [NM_003253]                                                                                 | gene         | 2.27E-12 | 6.87E-08          | up                       | 87.62                   | 569                 |
| TIMD4       | Homo sapiens T-cell immunoglobulin and mucin domain containing 4 (TIMD4), transcript variant 1, mRNA [NM_138379]                                                 | gene         | 5.91E-07 | 1.70E-02          | up                       | 5.88                    | Not used            |
| TIMD4       | Homo sapiens T-cell immunoglobulin and mucin domain containing 4 (TIMD4), transcript variant 1, mRNA [NM_138379]                                                 | gene         | 5.46E-07 | 1.57E-02          | up                       | 6.08                    | 334                 |
| TKT         | Homo sapiens transketolase (TKT), transcript variant 1, mRNA [NM_001064]                                                                                         | gene         | 5.31E-09 | 1.58E-04          | up                       | 6.82                    | 669                 |
| TLR2        | Homo sapiens toll-like receptor 2 (TLR2), mRNA [NM_003264]                                                                                                       | gene         | 2.54E-07 | 7.37E-03          | up                       | 25.01                   | 626                 |
| TLR4        | Homo sapiens toll-like receptor 4 (TLR4), transcript variant 1, mRNA [NM_138554]                                                                                 | gene         | 2.23E-09 | 6.66E-05          | up                       | 49.98                   | Not used            |
| TLR4        | Homo sapiens toll-like receptor 4 (TLR4), transcript variant 1, mRNA [NM_138554]                                                                                 | gene         | 1.15E-08 | 3.40E-04          | up                       | 119.63                  | 183                 |
| TLR8        | Homo sapiens toll-like receptor 8 (TLR8), transcript variant 1, mRNA [NM_010610]                                                                                 | gene         | 1.17E-13 | 3.55E-09          | up                       | 102.35                  | 571                 |
| TM6SF1      | Homo sapiens transmembrane 6 superfamily member 1 (TM6SF1), transcript variant 1, mRNA [NM_023003]                                                               | gene         | 7.65E-11 | 2.30E-06          | up                       | 13.60                   | 759                 |
| TMCO4       | Homo sapiens transmembrane and coiled-coil domains 4 (TMCO4), mRNA [NM_181719]                                                                                   | gene         | 1.37E-06 | 3.92E-02          | down                     | -2.23                   | 1205                |
| TMEM119     | Homo sapiens transmembrane protein 119 (TMEM119), mRNA [NM_181724]                                                                                               | gene         | 5.25E-07 | 7.31E-03          | up                       | 5.70                    | 338                 |
| TMEM151B    | Homo sapiens transmembrane protein 151B (TMEM151B), mRNA [NM_001137560]                                                                                          | gene         | 7.78E-08 | 2.28E-03          | down                     | -4.05                   | 1239                |
| TMEM158     | Homo sapiens transmembrane protein 158 (gene/pseudogene) (TMEM158), mRNA [NM_015444]                                                                             | gene         | 5.06E-07 | 1.46E-02          | up                       | 7.48                    | 245                 |
| TMEM164     | Homo sapiens transmembrane protein 164 (TMEM164), transcript variant 2, mRNA [NM_032227]                                                                         | gene         | 2.90E-08 | 8.56E-04          | up                       | 5.09                    | 405                 |
| TMEM170B    | Homo sapiens transmembrane protein 170B (TMEM170B), mRNA [NM_001100829]                                                                                          | gene         | 1.37E-06 | 3.90E-02          | up                       | 8.36                    | Not used            |
| TMEM170B    | Homo sapiens transmembrane protein 170B (TMEM170B), mRNA [NM_001100829]                                                                                          | gene         | 2.77E-07 | 6.89E-03          | up                       | 13.09                   | 688                 |
| TMEM173     | Homo sapiens transmembrane protein 173 (TMEM173), transcript variant 1, mRNA [NM_198282]                                                                         | gene         | 1.02E-12 | 3.08E-08          | up                       | 12.43                   | 332                 |
| TMEM176B    | Homo sapiens transmembrane protein 176B (TMEM176B), transcript variant 1, mRNA [NM_014020]                                                                       | gene         | 1.61E-07 | 4.69E-03          | up                       | 19.90                   | 753                 |
| TMEM45B     | Homo sapiens transmembrane protein 45B (TMEM45B), mRNA [NM_138788]                                                                                               | gene         | 4.68E-11 | 1.41E-06          | up                       | 34                      |                     |

| Gene Symbol    | Description                                                                                                                              | Feature Type | p-value  | Corrected p-value | Regulation in NOTCH1-mut | Fold change (Mut vs WT) | Position in Heatmap |
|----------------|------------------------------------------------------------------------------------------------------------------------------------------|--------------|----------|-------------------|--------------------------|-------------------------|---------------------|
| TPP1           | Homo sapiens tripeptidyl peptidase 1 (TPP1), mRNA [NM_000391]                                                                            | gene         | 1.56E-07 | 4.55E-03          | down                     | -3.26                   | 991                 |
| TPSG1          | Homo sapiens tryptase gamma 1 (TPSG1), mRNA [NM_012467]                                                                                  | gene         | 3.05E-08 | 8.98E-04          | down                     | -6.27                   | 861                 |
| TRABD2B        | Homo sapiens TraB domain containing 2B (TRABD2B), mRNA [NM_001194986]                                                                    | gene         | 1.30E-07 | 3.79E-03          | down                     | -3.54                   | 1062                |
| TRAPPCC3L      | trafficking protein particle complex 3-like [Source:HGNC Symbol;Acc:HGNC:21090] [ENST00000356128]                                        | gene         | 1.44E-07 | 4.20E-03          | down                     | -2.41                   | 1101                |
| TRAT1          | Homo sapiens T cell receptor associated transmembrane adaptor 1 (TRAT1), mRNA [NM_016388]                                                | gene         | 2.57E-13 | 7.79E-09          | up                       | 80.70                   | 578                 |
| TREM1          | Homo sapiens triggering receptor expressed on myeloid cells 1 (TREM1), transcript variant 2, mRNA [NM_001242589]                         | gene         | 4.63E-12 | 1.40E-07          | up                       | 112.66                  | Not used            |
| TREM1          | Homo sapiens triggering receptor expressed on myeloid cells 1 (TREM1), transcript variant 1, mRNA [NM_018643]                            | gene         | 1.06E-14 | 3.22E-10          | up                       | 30.33                   | Not used            |
| TREM1          | Homo sapiens triggering receptor expressed on myeloid cells 1 (TREM1), transcript variant 1, mRNA [NM_018643]                            | gene         | 4.27E-18 | 1.30E-13          | up                       | 410.52                  | 31                  |
| TREM4          | Homo sapiens triggering receptor expressed on myeloid cells-like 4 (TREM4), mRNA [NM_198153]                                             | gene         | 4.41E-09 | 1.31E-04          | up                       | 6.70                    | 246                 |
| TRERF1         | Homo sapiens transcriptional regulating factor 1 (TRERF1), transcript variant 1, mRNA [NM_001297573]                                     | gene         | 2.18E-11 | 6.58E-07          | up                       | 23.52                   | 770                 |
| TRERF1         | Homo sapiens transcriptional regulating factor 1 (TRERF1), transcript variant 2, mRNA [NM_033502]                                        | gene         | 1.38E-06 | 3.94E-02          | up                       | 15.90                   | Not used            |
| TREX2          | Homo sapiens three prime repair exonuclease 2 (TREX2), mRNA [NM_080701]                                                                  | gene         | 9.75E-08 | 2.85E-03          | down                     | -2.15                   | 1107                |
| TRGV7          | Homo sapiens T cell receptor gamma variable 7 pseudogene, mRNA (cDNA clone IMAGE:5210958). [BC027954]                                    | gene         | 9.54E-07 | 2.73E-02          | up                       | 7.71                    | 222                 |
| TRIM16         | tripartite motif containing 16 [Source:HGNC Symbol;Acc:HGNC:17241] [ENST00000582708]                                                     | gene         | 1.18E-06 | 3.36E-02          | down                     | -2.71                   | 1055                |
| TRIM33         | Homo sapiens tripartite motif containing 33 (TRIM33), transcript variant a, mRNA [NM_015906]                                             | gene         | 9.42E-09 | 2.79E-04          | up                       | 2.03                    | 435                 |
| TRIM46         | Homo sapiens tripartite motif containing 46 (TRIM46), transcript variant 8, mRNA [NM_001282379]                                          | gene         | 1.45E-08 | 4.29E-04          | down                     | -3.04                   | 904                 |
| TRPM6          | Homo sapiens transient receptor potential cation channel, subfamily M, member 6 (TRPM6), transcript variant a, mRNA [NM_017662]          | gene         | 7.49E-11 | 2.25E-06          | up                       | 28.14                   | 285                 |
| TSEN34         | Homo sapiens TSEN34 (RNA splicing endonuclease subunit) (TSEN34), transcript variant 3, mRNA [NM_001282332]                              | gene         | 9.27E-10 | 2.77E-05          | up                       | 7.52                    | 670                 |
| TSN23          | Homo sapiens teashirt zinc finger homeobox 3 (TSN23), mRNA [NM_020856]                                                                   | gene         | 1.59E-13 | 4.83E-09          | up                       | 33.69                   | 775                 |
| TSPAN14        | Homo sapiens tetraspanin 14 (TSPAN14), transcript variant 1, mRNA [NM_030927]                                                            | gene         | 1.19E-06 | 3.39E-02          | up                       | 3.53                    | Not used            |
| TSPAN14        | Homo sapiens tetraspanin 14 (TSPAN14), transcript variant 1, mRNA [NM_030927]                                                            | gene         | 4.89E-10 | 1.46E-05          | up                       | 8.51                    | Not used            |
| TSPAN14        | Homo sapiens tetraspanin 14 (TSPAN14), transcript variant 1, mRNA [NM_030927]                                                            | gene         | 1.08E-07 | 3.16E-03          | up                       | 10.01                   | 680                 |
| TSPAN16        | Homo sapiens tetraspanin 16 (TSPAN16), transcript variant 1, mRNA [NM_012466]                                                            | gene         | 2.83E-13 | 8.58E-09          | up                       | 40.25                   | 614                 |
| TSPAN2         | Homo sapiens tetraspanin 2 (TSPAN2), mRNA [NM_005725]                                                                                    | gene         | 2.76E-07 | 8.00E-03          | up                       | 10.96                   | 231                 |
| TSPAN4         | Homo sapiens tetraspanin 4 (TSPAN4), transcript variant 1, mRNA [NM_001025237]                                                           | gene         | 7.23E-08 | 2.12E-03          | up                       | 6.43                    | 510                 |
| TSPQ2          | Homo sapiens translocator protein 2 (TSPQ2), transcript variant 1, mRNA [NM_00110873]                                                    | gene         | 1.49E-08 | 4.40E-04          | down                     | -3.61                   | 1252                |
| TTC16          | Homo sapiens tetraatricopeptide repeat domain 16 (TTC16), mRNA [NM_144965]                                                               | gene         | 4.23E-10 | 1.27E-05          | up                       | 12.07                   | 728                 |
| TTY14          | Homo sapiens testis-specific transcript, Y-linked 14 (non-protein coding) (TTY14), transcript variant 5, long non-coding RNA [NR_001543] | gene         | 6.64E-09 | 1.91E-04          | down                     | -2.82                   | 1160                |
| TYH1           | Homo sapiens twenty family member 1 (TYH1), transcript variant 1, mRNA [NM_020659]                                                       | gene         | 3.80E-07 | 1.10E-02          | down                     | -3.51                   | 1259                |
| TUSC1          | Homo sapiens tumor suppressor candidate 1 (TUSC1), mRNA [NM_001004125]                                                                   | gene         | 5.19E-10 | 1.55E-05          | down                     | -6.25                   | 1241                |
| TUSC8          | AGENCOURT_8883169 Lupski_sciatic_nerve Homo sapiens cDNA clone IMAGE:619956 5', mRNA sequence [BQ950045]                                 | gene         | 1.65E-06 | 4.69E-02          | down                     | -3.58                   | 1167                |
| TYROBP         | Homo sapiens TYRO protein tyrosine kinase binding protein (TYROBP), transcript variant 1, mRNA [NM_003332]                               | gene         | 4.48E-10 | 1.34E-05          | up                       | 49.40                   | 98                  |
| UBASH3A        | Homo sapiens ubiquitin associated and SH3 domain containing A (UBASH3A), transcript variant 1, mRNA [NM_018961]                          | gene         | 1.02E-13 | 3.09E-09          | up                       | 33.46                   | 800                 |
| UBE2E3         | ubiquitin-conjugating enzyme E2E 3 [Source:HGNC Symbol;Acc:HGNC:12479] [ENST00000602837]                                                 | gene         | 3.44E-08 | 1.01E-03          | down                     | -1.60                   | 1113                |
| UCP3           | Homo sapiens uncoupling protein 3 (mitochondrial, proton carrier) (UCP3), transcript variant short, mRNA [NM_022803]                     | gene         | 2.04E-07 | 5.92E-03          | down                     | -4.49                   | 1226                |
| UMODL1         | uromodulin-like 1 [Source:HGNC Symbol;Acc:HGNC:12560] [ENST00000491559]                                                                  | gene         | 3.45E-07 | 1.00E-02          | down                     | -4.88                   | 1246                |
| UNC13B         | Homo sapiens unc-13 homolog B (C. elegans) (UNC13B), mRNA [NM_006377]                                                                    | gene         | 9.55E-07 | 2.73E-02          | down                     | -4.12                   | 1068                |
| UPP1           | Homo sapiens uridine phosphorylase 1 (UPP1), transcript variant 3, mRNA [NM_001287426]                                                   | gene         | 2.91E-10 | 8.72E-06          | up                       | 17.85                   | 257                 |
| UPP1           | Homo sapiens uridine phosphorylase 1 (UPP1), transcript variant 4, mRNA [NM_001287428]                                                   | gene         | 8.43E-11 | 2.53E-06          | up                       | 14.62                   | Not used            |
| UTS2R          | Homo sapiens urotensin 2 receptor (UTS2R), mRNA [NM_018949]                                                                              | gene         | 1.49E-10 | 4.47E-06          | down                     | -7.77                   | 863                 |
| VANGL1         | Homo sapiens VANG1 planar cell polarity protein 1 (VANGL1), transcript variant 1, mRNA [NM_138959]                                       | gene         | 1.11E-07 | 3.24E-03          | up                       | 11.99                   | 729                 |
| VAPA           | Homo sapiens VAMP (vesicle-associated membrane protein)-associated protein A, 33kDa (VAPA), transcript variant 1, mRNA [NM_003574]       | gene         | 1.05E-08 | 3.12E-04          | up                       | 3.16                    | 439                 |
| VCAN           | Homo sapiens versican (VCAN), transcript variant 1, mRNA [NM_004385]                                                                     | gene         | 1.18E-17 | 3.58E-13          | up                       | 62.44                   | 265                 |
| VCY            | Homo sapiens vesicle charge, Y-linked (VCY), mRNA [NM_004679]                                                                            | gene         | 3.36E-08 | 8.90E-04          | down                     | -3.41                   | 1267                |
| VDR            | Homo sapiens vitamin D (1,25-dihydroxyvitamin D3) receptor (VDR), transcript variant 2, mRNA [NM_001017535]                              | gene         | 5.36E-08 | 1.58E-03          | up                       | 18.43                   | 828                 |
| VEGFA          | Homo sapiens vascular endothelial growth factor A (VEGFA), transcript variant 1, mRNA [NM_001025366]                                     | gene         | 3.78E-08 | 1.11E-03          | up                       | 12.00                   | 839                 |
| VENTX          | Homo sapiens VENT homeobox (VENTX), mRNA [NM_014468]                                                                                     | gene         | 1.41E-10 | 4.23E-06          | up                       | 15.26                   | 304                 |
| VHL            | Homo sapiens von Hippel-Lindau tumor suppressor, E3 ubiquitin protein ligase (VHL), transcript variant 1, mRNA [NM_000551]               | gene         | 2.17E-07 | 6.31E-03          | down                     | -2.35                   | 1012                |
| VNN1           | Homo sapiens vanin 1 (VNN1), mRNA [NM_004666]                                                                                            | gene         | 5.79E-14 | 1.76E-09          | up                       | 76.62                   | 119                 |
| VNN2           | Homo sapiens vanin 2 (VNN2), transcript variant 1, mRNA [NM_004665]                                                                      | gene         | 2.52E-09 | 7.51E-05          | up                       | 16.40                   | 637                 |
| VNN3           | Homo sapiens vanin 3 (VNN3), transcript variant 5, mRNA [NM_001291703]                                                                   | gene         | 2.62E-14 | 7.97E-10          | up                       | 27.61                   | 259                 |
| VPS51          | Homo sapiens vacuolar protein sorting 51 homolog (S. cerevisiae) (VPS51), transcript variant 1, mRNA [NM_013265]                         | gene         | 3.61E-07 | 1.05E-02          | down                     | -1.71                   | 1116                |
| VPS53          | vacuolar protein sorting 53 homolog (S. cerevisiae) [Source:HGNC Symbol;Acc:HGNC:25608] [ENST00000541903]                                | gene         | 2.18E-07 | 6.33E-03          | down                     | -2.44                   | 912                 |
| VSIG4          | Homo sapiens V-set and immunoglobulin domain containing 4 (VSIG4), transcript variant 1, mRNA [NM_007268]                                | gene         | 1.33E-08 | 3.94E-04          | up                       | 8.60                    | 692                 |
| VSTM1          | Homo sapiens V-set and transmembrane domain containing 1 (VSTM1), transcript variant 1, mRNA [NM_198481]                                 | gene         | 1.11E-12 | 3.35E-08          | up                       | 161.82                  | 66                  |
| VXSI1          | Homo sapiens visual system homeobox 1 (VXSI1), transcript variant 2, mRNA [NM_199425]                                                    | gene         | 8.60E-10 | 2.57E-05          | down                     | -6.35                   | 857                 |
| WASH1          | Homo sapiens WAS protein family homolog 1 (WASH1), mRNA [NM_182905]                                                                      | gene         | 6.04E-07 | 1.74E-02          | down                     | -2.02                   | 1081                |
| WASH5P         | Homo sapiens WAS protein family homolog 5 pseudogene (WASH5P), non-coding RNA [NR_033266]                                                | gene         | 9.74E-07 | 2.79E-02          | down                     | -2.07                   | 1109                |
| WBP1           | Homo sapiens WW domain binding protein 1 (WBP1), mRNA [NM_012477]                                                                        | gene         | 2.14E-07 | 6.23E-03          | down                     | -2.15                   | 962                 |
| WDFY3          | WD repeat and FYVE domain containing 3 [Source:HGNC Symbol;Acc:HGNC:20751] [ENST00000426414]                                             | gene         | 1.14E-18 | 3.48E-14          | up                       | 93.81                   | 73                  |
| WDFY3          | Homo sapiens WD repeat and FYVE domain containing 3 (WDFY3), mRNA [NM_014991]                                                            | gene         | 3.42E-15 | 1.04E-10          | up                       | 51.66                   | Not used            |
| WDFY3-AS2      | Homo sapiens WDFY3 antisense RNA 2 (WDFY3-AS2), long non-coding RNA [NR_015359]                                                          | ncRNA        | 3.05E-10 | 9.15E-06          | up                       | 8.75                    | Not used            |
| WDR38          | Homo sapiens WD repeat domain 38 (WDR38), transcript variant 2, mRNA [NM_001045476]                                                      | gene         | 3.55E-08 | 1.05E-03          | down                     | -4.40                   | 1072                |
| WDR6           | Homo sapiens WD repeat domain 6 (WDR6), mRNA [NM_018031]                                                                                 | gene         | 1.70E-07 | 4.96E-03          | down                     | -1.92                   | 1089                |
| WLS            | Homo sapiens wireless Wnt ligand secretion mediator (WLS), transcript variant 2, mRNA [NM_001002292]                                     | gene         | 1.09E-09 | 3.25E-05          | up                       | 48.56                   | 287                 |
| WLS            | Homo sapiens wireless Wnt ligand secretion mediator (WLS), transcript variant 1, mRNA [NM_024911]                                        | gene         | 1.36E-06 | 3.86E-02          | up                       | 13.62                   | Not used            |
| WNT3A          | Homo sapiens wingless-type MMTV integration site family, member 3A (WNT3A), mRNA [NM_033131]                                             | gene         | 7.37E-07 | 2.11E-02          | down                     | -2.31                   | 1022                |
| WNT7B          | Homo sapiens wingless-type MMTV integration site family, member 7B (WNT7B), mRNA [NM_058238]                                             | gene         | 4.02E-07 | 1.16E-02          | down                     | -2.79                   | 1154                |
| WWOX           | Homo sapiens WW domain containing oxidoreductase (WWOX), transcript variant 3, non-coding RNA [NR_120435]                                | lincRNA      | 1.33E-06 | 3.79E-02          | down                     | -2.91                   | 1069                |
| XLOC_I2_000123 | BROAD Institute lincRNA (XLOC_I2_000123), lincRNA [TCONS_I2_00000181]                                                                    | lincRNA      | 7.79E-07 | 2.23E-02          | up                       | 1.72                    | Not used            |
| XLOC_I2_000900 | BROAD Institute lincRNA (XLOC_I2_000900), lincRNA [TCONS_I2_00001221]                                                                    | lincRNA      | 3.42E-09 | 1.02E-04          | down                     | -4.87                   | Not used            |
| XLOC_I2_001483 | BROAD Institute lincRNA (XLOC_I2_001483), lincRNA [TCONS_I2_00002890]                                                                    | lincRNA      | 1.65E-06 | 4.68E-02          | down                     | -2.22                   | Not used            |
| XLOC_I2_001760 | BROAD Institute lincRNA (XLOC_I2_001760), lincRNA [TCONS_I2_00003281]                                                                    | lincRNA      | 2.00E-07 | 5.83E-03          | down                     | -3.06                   | Not used            |
| XLOC_I2_003758 | BROAD Institute lincRNA (XLOC_I2_003758), lincRNA [TCONS_I2_00006892]                                                                    | lincRNA      | 8.80E-07 | 2.52E-02          | down                     | -2.86                   | Not used            |
| XLOC_I2_004072 | BROAD Institute lincRNA (XLOC_I2_004072), lincRNA [TCONS_I2_00007295]                                                                    | lincRNA      | 1.02E-06 | 2.91E-02          | down                     | -2.75                   | Not used            |
| XLOC_I2_004315 | BROAD Institute lincRNA (XLOC_I2_004315), lincRNA [TCONS_I2_00007925]                                                                    | lincRNA      | 1.12E-06 | 3.19E-02          | down                     | -4.43                   | Not used            |
| XLOC_I2_004594 | BROAD Institute lincRNA (XLOC_I2_004594), lincRNA [TCONS_I2_00008470]                                                                    | lincRNA      | 9.12E-08 | 2.67E-03          | down                     | -2.52                   | Not used            |
| XLOC_I2_004844 | BROAD Institute lincRNA (XLOC_I2_004844), lincRNA [TCONS_I2_00008932]                                                                    | lincRNA      | 1.61E-08 | 4.76E-04          | down                     | -4.10                   | Not used            |
| XLOC_I2_005415 | BROAD Institute lincRNA (XLOC_I2_005415), lincRNA [TCONS_I2_00010039]                                                                    | lincRNA      | 2.04E-09 | 6.09E-05          | down                     | -3.04                   | Not used            |
| XLOC_I2_005490 | BROAD Institute lincRNA (XLOC_I2_005490), lincRNA [TCONS_I2_00010170]                                                                    | lincRNA      | 2.59E-09 | 7.73E-05          | up                       | 12.86                   | Not used            |
| XLOC_I2_005933 | BROAD Institute lincRNA (XLOC_I2_005933), lincRNA [TCONS_I2_00011027]                                                                    | lincRNA      | 3.79E-07 | 1.10E-02          | down                     | -3.15                   | Not used            |
| XLOC_I2_006025 | BROAD Institute lincRNA (XLOC_I2_006025), lincRNA [TCONS_I2_00011143]                                                                    | lincRNA      | 1.21E-06 | 3.45E-02          | down                     | -4.10                   | Not used            |
| XLOC_I2_006196 | BROAD Institute lincRNA (XLOC_I2_006196), lincRNA [TCONS_I2_00011463]                                                                    | lincRNA      | 6.64E-10 | 1.99E-05          | up                       | 28.81                   | Not used            |
| XLOC_I2_006926 | BROAD Institute lincRNA (XLOC_I2_006926), lincRNA [TCONS_I2_00012876]                                                                    | lincRNA      | 6.91E-09 | 2.05E-04          | down                     | -5.39                   | Not used            |
| XLOC_I2_006958 | BROAD Institute lincRNA (XLOC_I2_006958), lincRNA [TCONS_I2_00012917]                                                                    | lincRNA      | 5.02E-07 | 1.45E-02          | down                     | -2.58                   | Not used            |
| XLOC_I2_007135 | BROAD Institute lincRNA (XLOC_I2_007135), lincRNA [TCONS_I2_00013243]                                                                    | lincRNA      | 1.61E-06 | 4.58E-02          | down                     | -3.72                   | Not used            |
| XLOC_I2_007767 | BROAD Institute lincRNA (XLOC_I2_007767), lincRNA [TCONS_I2_00014250]                                                                    | lincRNA      | 1.13E-08 | 3.34E-04          | down                     | -2.62                   | Not used            |
| XLOC_I2_007967 | BROAD Institute lincRNA (XLOC_I2_007967), lincRNA [TCONS_I2_00014514]                                                                    | lincRNA      | 1.76E-06 | 4.98E-02          | down                     | -2.59                   | Not used            |
| XLOC_I2_008013 | BROAD Institute lincRNA (XLOC_I2_008013), lincRNA [TCONS_I2_00014567]                                                                    | lincRNA      | 3.59E-09 | 1.07E-04          | up                       | 26.78                   | Not used            |
| XLOC_I2_009328 | BROAD Institute lincRNA (XLOC_I2_009328), lincRNA [TCONS_I2_00017652]                                                                    | lincRNA      | 3.12E-08 | 9.21E-04          | down                     | -2.79                   | Not used            |
| XLOC_I2_009469 | BROAD Institute lincRNA (XLOC_I2_009469), lincRNA [TCONS_I2_00017900]                                                                    | lincRNA      | 1.01E-07 | 2.96E-03          | down                     | -4.71                   | Not used            |
| XLOC_I2_009639 | BROAD Institute lincRNA (XLOC_I2_009639), lincRNA [TCONS_I2_00018461]                                                                    | lincRNA      | 6.46E-07 | 1.86E-02          | up                       | 5.15                    | Not used            |
| XLOC_I2_009773 | BROAD Institute lincRNA (XLOC_I2_009773), lincRNA [TCONS_I2_00018665]                                                                    | lincRNA      | 4.95E-07 | 1.43E-02          | down                     | -2.57                   | Not used            |
| XLOC_I2_009867 | BROAD Institute lincRNA (XLOC_I2_009867), lincRNA [TCONS_I2_00018819]                                                                    | lincRNA      | 1.18E-07 | 3.46E-03          | down                     | -2.91                   | Not used            |
| XLOC_I2_010493 | BROAD Institute lincRNA (XLOC_I2_010493), lincRNA [TCONS_I2_00019671]                                                                    | lincRNA      | 6.61E-10 | 1.98E-05          | down                     | -2.43                   | Not used            |
| XLOC_I2_010751 | BROAD Institute lincRNA (XLOC_I2_010751), lincRNA [TCONS_I2_00020645]                                                                    | lincRNA      | 2.14E-07 | 6.23E-03          | down                     | -3.66                   | Not used            |
| XLOC_I2_010888 | BROAD Institute lincRNA (XLOC_I2_010888), lincRNA [TCONS_I2_00021752]                                                                    | lincRNA      | 1.43E-07 | 4.18E-03          | down                     | -3.26                   | Not used            |
| XLOC_I2_011048 | BROAD Institute lincRNA (XLOC_I2_011048), lincRNA [TCONS_I2_00021062]                                                                    | lincRNA      | 1.10E-06 | 3.13E-02          | down                     | -3.43                   | Not used            |
| XLOC_I2_011426 | BROAD Institute lincRNA (XLOC_I2_011426), lincRNA [TCONS_I2_00022102]                                                                    | lincRNA      | 7.66E-08 | 2.25E-03          | down                     | -5.33                   | Not used            |
| XLOC_I2_015033 | BROAD Institute lincRNA (XLOC_I2_015033), lincRNA [TCONS_I2_00029054]                                                                    | lincRNA      | 4.03E-11 | 1.21E-06          | up                       | 16.44                   | Not used            |
| XPO6           | Homo sapiens exportin 6 (XPO6), transcript variant 1, mRNA [NM_001270940]                                                                | gene         | 5.02E-07 | 1.45E-02          | up                       | 3.96                    | 353                 |
| YJEFN3         | Homo sapiens YJef N-terminal domain containing 3 (YJEFN3), transcript variant 1, mRNA [NM_198537]                                        | gene         | 1.41E-08 | 4.17E-04          | down                     | -4.05                   | 1240                |
| YTHDF2         | Homo sapiens YTH N(6)-methyladenosine RNA binding protein 2 (YTHDF2), transcript variant 2, mRNA [NM_001173128]                          | gene         | 7.42E-07 | 2.07E-02          | down                     | -2.69                   |                     |

Supplementary Table 5. Gene Set Enrichment Analysis of *Notch*-related datasets.

| Name                                                                | Description                                                                                                                                                                                                               | Collection     | Total size | <i>NOTCH1</i> -mut vs. WT |      |         |             | <i>SF3B1</i> -mut vs. WT |       |          |              |
|---------------------------------------------------------------------|---------------------------------------------------------------------------------------------------------------------------------------------------------------------------------------------------------------------------|----------------|------------|---------------------------|------|---------|-------------|--------------------------|-------|----------|--------------|
|                                                                     |                                                                                                                                                                                                                           |                |            | Size                      | NES  | p-value | FDR q-value | Colonn:Size2             | NES3  | p-value4 | FDR q-value5 |
| <b>PID_NOTCH_PATHWAY</b>                                            | Notch signaling pathway                                                                                                                                                                                                   | C2-CP          | 61         | 51                        | 1    | 0.429   | 0.384       | 51                       | -0.89 | 0.669    | 1            |
| <b>KEGG_NOTCH_SIGNALING_PATHWAY</b>                                 | Notch signaling pathway                                                                                                                                                                                                   | C2-CP KEGG     | 49         | 43                        | 1.17 | 0.214   | 0.235       | 43                       | 0.71  | 0.916    | 0.858        |
| <b>REACTOME_ACTIVATED_NOTCH1_TRANSMITS_SIGNAL_TO_THE_NUCLEUS</b>    | Genes involved in Activated NOTCH1 Transmits Signal to the Nucleus                                                                                                                                                        | C2-CP Reactome | 29         | 20                        | 1.43 | 0.044   | 0.074       | 20                       | 1.06  | 0.369    | 0.388        |
| <b>REACTOME_NOTCH1_INTRACELLULAR_DOMAIN_REGULATES_TRANSCRIPTION</b> | Genes involved in NOTCH1 Intracellular Domain Regulates Transcription                                                                                                                                                     | C2-CP Reactome | 48         | 40                        | 1.04 | 0.397   | 0.38        | 40                       | 1.17  | 0.204    | 0.258        |
| <b>REACTOME_SIGNALING_BY_NOTCH1</b>                                 | Genes involved in Signaling by NOTCH1                                                                                                                                                                                     | C2-CP Reactome | 72         | 58                        | 1.3  | 0.099   | 0.145       | 58                       | 1.29  | 0.085    | 0.158        |
| <b>NGUYEN_NOTCH1_TARGETS_DN</b>                                     | Genes down-regulated in primary keratinocytes by expression of constantly active NOTCH1                                                                                                                                   | C2-CPG         | 88         | 74                        | 1.69 | 0.01    | 0.016       | 74                       | 1.75  | 0.002    | 0.016        |
| <b>NGUYEN_NOTCH1_TARGETS_UP</b>                                     | Genes up-regulated in primary keratinocytes by expression of constantly active NOTCH1                                                                                                                                     | C2-CPG         | 31         | 24                        | 1.27 | 0.156   | 0.157       | 24                       | -0.88 | 0.689    | 0.943        |
| <b>VILIMAS_NOTCH1_TARGETS_DN</b>                                    | Genes down-regulated in bone marrow progenitors by constitutively active NOTCH1                                                                                                                                           | C2-CPG         | 22         | 18                        | 1.73 | <0,001  | 0.019       | 18                       | 1.83  | 0.006    | 0.016        |
| <b>VILIMAS_NOTCH1_TARGETS_UP</b>                                    | Genes up-regulated in bone marrow progenitors by constitutively active NOTCH1                                                                                                                                             | C2-CPG         | 54         | 48                        | 2.04 | <0,001  | <0,001      | 48                       | 2.12  | <0,001   | <0,001       |
| <b>GO_NEGATIVE_REGULATION_OF_NOTCH_SIGNALING_PATHWAY</b>            | Any process that stops, prevents, or reduces the frequency, rate or extent of the Notch signaling pathway                                                                                                                 | C5-BP          | 30         | 18                        | 1.53 | 0.046   | 0.043       | 18                       | 1.67  | 0.03     | 0.023        |
| <b>GO_NOTCH_SIGNALING_PATHWAY</b>                                   | A series of molecular signals initiated by the binding of an extracellular ligand to the receptor Notch on the surface of a target cell, and ending with regulation of a downstream cellular process, e.g. transcription. | C5-BP          | 116        | 82                        | 1.03 | 0.369   | 0.367       | 82                       | 0.73  | 0.912    | 0.895        |
| <b>GO_POSITIVE_REGULATION_OF_NOTCH_SIGNALING_PATHWAY</b>            | Any process that activates or increases the frequency, rate or extent of the Notch signaling pathway                                                                                                                      | C5-BP          | 36         | 24                        | 1.46 | 0.043   | 0.066       | 24                       | 1.64  | 0.012    | 0.023        |
| <b>GO_REGULATION_OF_NOTCH_SIGNALING_PATHWAY</b>                     | Any process that modulates the frequency, rate or extent of the Notch signaling pathway                                                                                                                                   | C5-BP          | 69         | 46                        | 1.59 | <0,001  | 0.028       | 46                       | 1.72  | 0.006    | 0.019        |
| <b>NOTCH_DN_V1_DN</b>                                               | Genes down-regulated in MOLT4 cells (T-ALL) by DAPT [PubChem=16219261], an inhibitor of NOTCH signaling pathway                                                                                                           | C6             | 191        | 125                       | 1.88 | <0,001  | 0.006       | 125                      | 1.78  | <0,001   | 0.015        |
| <b>NOTCH_DN_V1_UP</b>                                               | Genes up-regulated in MOLT4 cells (T-ALL) by DAPT [PubChem=16219261], an inhibitor of NOTCH signaling pathway.                                                                                                            | C6             | 195        | 119                       | 1.68 | <0,001  | 0.015       | 119                      | 1.47  | 0.018    | 0.06         |
| <b>FABBRI_NOTCH_SIGNALING</b>                                       | NOTCH1-dependent CLL signature from Fabbri et al.                                                                                                                                                                         | Custom         | 293        | 270                       | 1.71 | <0,001  | 0.019       | 270                      | 1.57  | 0.016    | 0.038        |
| <b>Hallmark_NOTCH_signaling</b>                                     | Genes up-regulated by activation of Notch signaling                                                                                                                                                                       | H              | 34         | 26                        | 1.65 | 0.002   | 0.019       | 26                       | 1.49  | 0.037    | 0.062        |
